# Supplementary material for: Chromatin state signatures associated with tissue-specific gene expression and enhancer activity in the embryonic limb
Source: HighWire-hosted journal article supplement (doi:10.1101/gr.129817.111), 2012-03-15
Supplement: Supplemental_Tables.xlsx [file Supplemental_Tables.xlsx]

## Sheet: Table S1 FL-VS-HL DE
ucsc_cluster_id	ucsc_transcript_id	mgi_gene_symbol	entrezgene_id	FL1	FL2	HL1	HL2	LRT_statistics	rawP	bonP	bhP
25351	uc009prp.1	Crabp1	12903	345.022	334.47	791.233	1050.66	557.385	3.11562e-123	8.4237e-119	8.4237e-119
6025	uc007qsd.1	Pitx1	18740	10.6348	0.9625	151.733	225.953	433.478	2.8437e-96	7.68851e-92	3.84425e-92
21206	uc009fep.1	Rps5	20103	1588.27	1168.67	1854.87	2179.04	241.566	1.7912e-54	4.84288e-50	1.61429e-50
8218	uc007wmt.1	Rpl8	26961	1512.75	1332.94	1743.46	2287.05	204.896	1.78405e-46	4.82354e-42	1.20589e-42
26295	uc009vfc.1	X57780	N/A	472.196	469.782	233.899	200.192	192.058	1.13029e-43	3.05596e-39	6.11193e-40
25491	uc009qcv.1|uc009qcw.1	Punc	N/A	186.143	239.726	354.171	528.631	162.959	2.55398e-37	6.90521e-33	1.15087e-33
26294	uc009vfb.1	mt-Nd4	null	408.307	393.347	173.624	199.037	159.688	1.32348e-36	3.57828e-32	5.11183e-33
26289	uc009vew.1	AK018753	N/A	550.915	586.515	407.437	223.15	148.042	4.64544e-34	1.25599e-29	1.56998e-30
26290	uc009vex.1	AK163440	N/A	334.999	350.429	195.694	113.526	144.883	2.27738e-33	6.15736e-29	6.84151e-30
18922	uc008zgz.1	Tbx5	21388	44.7525	52.0493	0.515389	0.196618	124.697	5.92862e-29	1.60292e-24	1.60292e-25
8742	uc007xwz.1	Hoxc10	209448	3.92296	1.1799	63.1175	47.7113	119.587	7.78907e-28	2.10593e-23	1.91448e-24
3770	uc007ksc.2|uc007ksd.2	Tbx4	21387	7.77171	5.76009	63.4011	69.3653	110.139	9.13478e-26	2.46977e-21	2.05814e-22
17453	uc008vdw.1	Lin28	N/A	11.061	10.9247	66.8837	75.2418	98.0568	4.06544e-23	1.09917e-18	8.45518e-20
3022	uc007ipa.1|uc007ipb.1	Gnb2l1	14694	834.19	782.825	1053.72	1142.36	88.2616	5.73468e-21	1.55049e-16	1.10749e-17
5342	uc007pam.1|uc007pan.1|uc007pao.1	Dlk1	13386	88.2772	70.7715	107.928	261.347	85.8772	1.91463e-20	5.17659e-16	3.45106e-17
22714	uc009iut.1	Hbb-y	15135	2895.12	2573.99	3706.27	2719.79	77.0777	1.6436e-18	4.44381e-14	2.77738e-15
2326	uc007gqi.1	Hsp90b1	22027	329.535	292.644	156.929	206.449	69.3773	8.1318e-17	2.1986e-12	1.29329e-13
14662	uc008npe.1|uc008npf.1	Nnat	18111	314.441	269.368	405.086	494.034	67.8993	1.72062e-16	4.65204e-12	2.58447e-13
2941	uc007ijj.1	Hba-x	15126	2699.74	2991.03	3248.26	3352.16	67.2879	2.34614e-16	6.34326e-12	3.33856e-13
10420	uc008ciq.1	Tubb5	22154	1046.59	1056.06	1274.25	1390.6	66.3967	3.6872e-16	9.96908e-12	4.98454e-13
18146	uc008xfl.1|uc008xfm.1	Crmp1	12933	27.863	33.341	80.1448	98.7255	60.6147	6.9414e-15	1.87674e-10	8.93688e-12
23922	uc009mbd.1	Lsm4	50783	177.475	141.079	200.31	340.96	58.5602	1.97166e-14	5.33078e-10	2.42308e-11
20808	uc009edr.1	Fkbp4	14228	408.376	366.919	504.104	598.8	57.5813	3.24289e-14	8.7678e-10	3.81209e-11
3461	uc007jvv.1	Pfn1	18643	666.956	761.334	792.844	1067.35	56.9236	4.53084e-14	1.225e-09	5.10418e-11
2135	uc007gge.1|uc007ggf.1	Eef2	13629	401.92	358.003	454.392	624.305	55.2963	1.03662e-13	2.80272e-09	1.12109e-10
23233	uc009kel.1	Mki67	17345	80.3723	69.254	15.8783	34.7171	50.1541	1.42131e-12	3.8428e-08	1.478e-09
8741	uc007xwy.1	Hoxc11	109663	1.63043	0.450125	24.6592	21.1904	49.9144	1.60599e-12	4.34212e-08	1.60819e-09
13141	uc008jyt.1|uc008jyu.1	Ssb	20823	118.307	107.055	46.3058	55.5103	47.4239	5.71801e-12	1.54598e-07	5.52135e-09
10563	uc008cqz.1	Hsp90ab1	15516	653.27	585.936	863.026	732.191	44.8382	2.14008e-11	5.78613e-07	1.99522e-08
19279	uc009ajl.1	Fscn1	14086	424.042	470.477	498.842	693.743	42.9848	5.51655e-11	1.49151e-06	4.9717e-08
23234	uc009kem.1	Ki-67	N/A	67.9326	61.1498	13.1082	33.6922	39.7229	2.92671e-10	7.91295e-06	2.55256e-07
25069	uc009pak.1|uc009pal.1	AK011865	N/A	31.0637	28.8905	5.19271	4.83851	39.6243	3.07826e-10	8.32269e-06	2.60084e-07
16165	uc008rwn.1	Rps20	67427	129.488	123.272	127.467	286.125	39.369	3.5083e-10	9.48539e-06	2.87436e-07
3993	uc007lic.1|uc007lid.1	Top2a	21973	160.351	145.576	75.5502	94.7587	38.7347	4.85502e-10	1.31265e-05	3.7699e-07
9864	uc008bbz.1|uc008bca.1|uc008bcb.1	Metrn	70083	71.1273	77.4611	104.344	171.396	38.7246	4.88023e-10	1.31947e-05	3.7699e-07
8617	uc007xoj.1	Tuba1b	22143	46.2354	24.736	69.9911	94.9096	38.4994	5.47703e-10	1.48083e-05	4.11341e-07
26776	uc009tmb.1	Dusp9	75590	81.397	86.9302	125.532	170.44	35.7724	2.21766e-09	5.99589e-05	1.62051e-06
2609	uc007hle.1	Atp5b	11947	517.75	498.327	659.693	642.533	35.6104	2.40995e-09	6.51578e-05	1.71468e-06
18877	uc008zdq.1	Sfrs9	108014	153.122	131.221	172.395	272.263	35.4535	2.61206e-09	7.06223e-05	1.81083e-06
3093	uc007itz.1|uc007iua.1|uc007iub.1	Hnrpab	N/A	448.267	436.404	540.681	607.114	34.3964	4.49563e-09	0.000121548	3.03871e-06
20871	uc009eis.1|uc009eit.1	Csda	56449	117.993	116.167	162.268	215.619	34.2021	4.96746e-09	0.000134305	3.27574e-06
20201	uc009csc.1	Pcbp1	23983	292.294	309.708	325.878	493.114	33.2679	8.02954e-09	0.000217095	5.16892e-06
2072	uc007gbi.1	Polr2e	66420	164.272	135.696	191.884	265.542	33.1768	8.41498e-09	0.000227516	5.29107e-06
15325	uc008ply.1|uc008plz.1|uc008pma.1|uc008pmb.1	Smc4	70099	61.1704	58.5389	18.6713	27.7243	33.0131	9.15392e-09	0.000247494	5.55949e-06
21212	uc009ffb.1	Trim28	21849	522.418	512.989	656.1	656.888	32.9922	9.25314e-09	0.000250177	5.55949e-06
17441	uc008vcy.1	Nudc	18221	132.444	90.075	130.096	228.167	32.1885	1.39916e-08	0.000378291	8.22372e-06
27010	uc009uct.1	Sh3bgrl	56726	50.5098	56.1574	22.943	17.4876	31.6938	1.80496e-08	0.000488007	1.03831e-05
3149	uc007iyj.1	Hint1	15254	214.539	200.89	293.932	299.251	31.2108	2.31476e-08	0.00062584	1.30383e-05
11780	uc008fzg.1	Ppp1ca	19045	408.21	393.709	545.798	494.656	31.0809	2.47489e-08	0.000669135	1.36558e-05
1447	uc007eki.1	Sf3b5	66125	124.013	115.297	139.851	234.739	30.3751	3.56076e-08	0.000962724	1.92545e-05
5859	uc007qhv.1|uc007qhw.1	Dek	110052	91.1914	83.4358	38.958	48.2003	29.5624	5.41442e-08	0.0014639	2.87039e-05
8318	uc007wst.1	Polr2f	69833	126.584	101.457	161.567	196.35	29.0809	6.9417e-08	0.00187683	3.60928e-05
2077	uc007gby.1|uc007gbz.1	Atp5d	66043	253.205	218.537	257.952	393.975	28.9501	7.42665e-08	0.00200794	3.72554e-05
19254	uc009ahr.1	Eif3b	27979	194.561	190.024	262.386	286.706	28.9464	7.44089e-08	0.00201179	3.72554e-05
350	uc007bfz.1	Eef1b2	55949	488.715	420.936	637.594	514.965	28.6894	8.49659e-08	0.00229722	4.17677e-05
3421	uc007jsq.1|uc007jsr.1|uc007jss.1|uc007jst.1|uc007jsu.1|uc007jsv.1	Eif5a	276770	112.093	112.803	141.851	211.394	28.5824	8.97957e-08	0.00242781	4.33537e-05
17131	uc008ugw.1|uc008ugx.1|uc008ugy.1|uc008ugz.1	Nasp	50927	130.984	119.432	59.6062	86.4091	27.6361	1.4642e-07	0.00395876	6.9452e-05
13191	uc008kdm.1	Atp5g3	228033	423.121	355.185	552.005	446.765	27.5564	1.52581e-07	0.00412534	7.11265e-05
6262	uc007rjg.1|uc007rjh.1|uc007rji.1|uc007rjj.1|uc007rjk.1	Vcan	13003	45.6151	42.3048	14.4428	18.0466	27.1757	1.85781e-07	0.00502296	8.51348e-05
23374	uc009koc.1|uc009kod.1	Igf2	16002	881.027	1024.38	853.826	743.065	27.1236	1.90859e-07	0.00516024	8.6004e-05
3072	uc007isj.1|uc007isk.1|uc007isl.1|uc007ism.1	Hnrph1	N/A	222.299	209.643	136.464	156.634	26.8154	2.2385e-07	0.00605223	9.87946e-05
23111	uc009juw.1	2410015N17Rik	N/A	129.933	113.805	173.068	198.962	26.7922	2.26551e-07	0.00612527	9.87946e-05
25991	uc009rjt.1|uc009rju.1	Pcbp4	59092	174.697	183.384	218.66	291.143	26.7552	2.30924e-07	0.00624349	9.9103e-05
2095	uc007gda.1|uc007gdb.1|uc007gdc.1	Mbd3	17192	183.334	174.329	199.709	306.226	25.8547	3.68101e-07	0.00995234	0.000155505
11187	uc008emg.1|uc008emh.1|uc008emi.1	Matr3	17184	70.4838	66.4302	29.6825	35.0617	25.6291	4.13759e-07	0.0111868	0.000169505
19630	uc009bfs.1|uc009bft.1|uc009bfu.1	Mest	17294	1190.96	1352.91	1700.91	1217.25	25.629	4.13777e-07	0.0111873	0.000169505
27001	uc009ucg.1	Itm2a	16431	85.5828	83.8255	58.6292	30.8254	25.0193	5.67595e-07	0.0153461	0.000229046
24807	uc009okg.1|uc009okh.1	Cdc37	12539	158.285	139.6	177.994	253.654	24.7373	6.57006e-07	0.0177635	0.000261228
24796	uc009ojm.1	Eif3g	53356	159.317	143.242	207.204	228.292	24.1334	8.98897e-07	0.0243035	0.000352224
6832	uc007swt.1	Nt5dc2	70021	304.412	288.994	344.728	428.203	23.788	1.0755e-06	0.0290784	0.000415405
15399	uc008prj.1	Mab21l2	23937	75.1489	75.8881	49.5352	27.6	23.6818	1.13651e-06	0.0307279	0.000432787
6816	uc007svc.1	Tkt	21881	176.547	175.731	225.695	266.572	23.2748	1.4043e-06	0.0379682	0.000527335
23076	uc009jsj.1	Bola2	66162	139.469	117.591	140.52	237.02	23.1983	1.46127e-06	0.0395084	0.000533965
10369	uc008cey.1|uc008cez.1	Vars	22321	100.885	110.947	136.728	185.886	23.198	1.46146e-06	0.0395134	0.000533965
11459	uc008fft.1	Pmaip1	58801	23.8513	20.1672	7.48944	2.57529	23.11	1.52992e-06	0.0413645	0.000551527
12482	uc008hwy.1	Smc3	13006	53.9631	47.3036	13.4077	30.6281	23.0229	1.60081e-06	0.043281	0.000563156
23935	uc009mby.1	Ccdc124	234388	97.3469	75.549	105.126	169.323	23.0193	1.60384e-06	0.043363	0.000563156
15984	uc008rim.1	Nola1	N/A	64.3988	50.3532	81.8982	116.225	22.8968	1.70932e-06	0.046215	0.0005925
8398	uc007wza.1|uc007wzb.1	1500032L24Rik	69029	101.173	86.4907	121.073	169.083	22.4172	2.19396e-06	0.0593182	0.000750863
14245	uc008msw.1|uc008msx.1|uc008msy.1	Pax1	18503	11.8899	8.53521	0.546349	0.313182	22.3626	2.25733e-06	0.0610314	0.000762893
14604	uc008njr.1|uc008njs.1|uc008njt.1|uc008nju.1|uc008njv.1	Raly	19383	300.747	270.771	330.615	412.367	22.2996	2.33255e-06	0.0630652	0.000778583
14053	uc008mdb.1|uc008mdc.1|uc008mdd.1	Cops2	12848	48.0109	49.9062	18.6085	23.8858	22.0341	2.67856e-06	0.0724202	0.000883174
17743	uc008vxz.1	Park7	57320	207.031	169.487	251.41	263.97	21.7734	3.06817e-06	0.082954	0.000999446
3473	uc007jxf.1	C1qbp	12261	140.83	152.533	225.257	191.711	21.3859	3.75521e-06	0.10153	0.00120869
18058	uc008wxr.1	Ppm1g	14208	136.495	132.984	184.969	201.615	21.3416	3.84305e-06	0.103905	0.0012177
8942	uc007ymy.1	Ranbp1	19385	174.735	157.755	188.461	274.809	21.3266	3.87328e-06	0.104722	0.0012177
1341	uc007eao.1|uc007eap.1|uc007eaq.1|uc007ear.1	Cenpf	108000	30.256	24.7732	4.01382	12.7399	21.1092	4.33845e-06	0.117299	0.00134826
4509	uc007mtj.1|uc007mtk.1	Arhgdia	192662	142.147	143.119	185.885	218.966	20.9761	4.65058e-06	0.125738	0.00142884
6568	uc007shc.1|uc007shd.1	Top2b	21974	68.2079	70.5675	31.939	40.5666	20.8927	4.85753e-06	0.131333	0.00147565
952	uc007cyb.1|uc007cyc.1|uc007cyd.1|uc007cye.1|uc007cyf.1	Tpr	108989	50.3447	48.7584	12.2792	33.2795	20.7535	5.22357e-06	0.14123	0.00156922
13195	uc008kdu.1	Hoxd13	15433	49.712	39.7133	22.3546	16.5341	20.7239	5.30491e-06	0.143429	0.00157614
4425	uc007mmn.1|uc007mmo.1	Sfrs2	20382	370.693	388.617	430.341	515.182	20.1129	7.30031e-06	0.197378	0.00214542
8241	uc007wom.1	Eif3d	55944	123.896	115.26	164.865	181.893	20.0187	7.66894e-06	0.207345	0.00222952
14932	uc008oib.1	Psma7	26444	261.686	231.056	336.714	304.728	19.6169	9.46272e-06	0.255843	0.00272174
24060	uc009mla.1|uc009mlb.1	Ddx39	68278	97.0486	97.3382	144.46	146.381	19.1682	1.19692e-05	0.323611	0.00340643
7774	uc007vkj.1	Cct5	12465	367.493	354.708	447.85	448.648	18.953	1.33978e-05	0.362236	0.0037733
13258	uc008kiv.1|uc008kiw.1	2700094K13Rik	72657	278.591	236.377	307.876	355.589	18.8808	1.39145e-05	0.376207	0.00387842
4160	uc007ltb.1|uc007ltc.1	Dcakd	68087	217.859	220.298	260.897	314.826	18.8395	1.42194e-05	0.384449	0.00392295
22891	uc009jdk.1	Lmo1	109594	24.136	32.9061	56.7416	56.1438	18.7961	1.45467e-05	0.393299	0.00397272
26457	uc009srl.1	Ddx3x	13205	98.9555	100.047	47.4967	75.2085	18.6517	1.56904e-05	0.42422	0.0042422
19493	uc009avl.1|uc009avm.1|uc009avn.1	Col1a2	12843	57.9348	48.7128	30.2098	22.5609	18.5878	1.62256e-05	0.438693	0.00434349
13534	uc008kwa.1|uc008kwb.1|uc008kwc.1|uc008kwd.1|uc008kwe.1|uc008kwf.1	Ckap5	75786	53.6844	50.2396	18.5308	31.5434	18.4934	1.70497e-05	0.460973	0.00449685
18151	uc008xfw.1	Msx1	17701	94.3576	94.9393	137.113	144.758	18.4843	1.71312e-05	0.463175	0.00449685
19111	uc008zwp.1|uc008zwq.1	Eif4h	22384	292.31	298.667	368.243	380.281	18.4509	1.74336e-05	0.471352	0.00453223
4739	uc007nkf.1	Meox2	17286	27.7663	21.599	10.0096	5.95604	18.3861	1.80365e-05	0.487653	0.00464431
22888	uc009jdc.1	Eif3f	66085	290.051	286.004	361.748	368.193	18.2016	1.98714e-05	0.537262	0.00506851
18921	uc008zgy.1	AK087181	N/A	6.55758	5.82171	0.070806	0.234658	18.0218	2.18387e-05	0.590452	0.00551824
21846	uc009gvc.1|uc009gvd.1	Ruvbl2	20174	121.59	112.589	146.929	188.647	17.9595	2.25656e-05	0.610106	0.00564913
8989	uc007yqs.1|uc007yqt.1|uc007yqu.1|uc007yqv.1|uc007yqw.1	Eif4g1	208643	230.022	234.463	296.737	305.039	17.9152	2.30975e-05	0.624487	0.00572924
20258	uc009cvx.1	Mcm2	17216	171.333	157.833	196.178	249.535	17.7309	2.54454e-05	0.687968	0.00625425
7755	uc007vix.1	Basp1	70350	127.237	97.3456	137.554	183.62	17.6854	2.60616e-05	0.704627	0.00634799
2007	uc007fwo.1	Pfkl	18641	120.554	104.448	133.803	188.869	17.6202	2.69712e-05	0.729219	0.00647786
21809	uc009gsf.1|uc009gsg.1|uc009gsh.1|uc009gsi.1	Prmt1	15469	185.852	176.918	211.529	272.702	17.6129	2.7074e-05	0.731999	0.00647786
1156	uc007doc.1	Pfdn2	18637	93.4048	62.5101	104.315	134.792	17.5712	2.76752e-05	0.748255	0.00656364
26080	uc009rrg.1	Uqcrc1	22273	164.315	149.868	200.357	227.006	17.2995	3.19265e-05	0.863196	0.00750605
13010	uc008jnk.1|uc008jnl.1	Lhx2	16870	49.286	62.5711	74.8261	108.371	17.2571	3.26483e-05	0.882712	0.00760959
16567	uc008swj.1|uc008swk.1|uc008swl.1	Smc2	14211	34.3208	33.8107	9.87723	17.7724	17.1859	3.38942e-05	0.916396	0.00783245
4723	uc007niw.1	Twist1	22160	132.452	122.751	137.587	219.377	17.0796	3.58454e-05	0.969153	0.00821316
3094	uc007iuc.1	Nola2	N/A	67.7324	61.3649	87.023	117.226	17.0377	3.66453e-05	0.99078	0.00831703
21842	uc009guw.1|uc009gux.1|uc009guy.1	Snrp70	N/A	165.97	124.271	169.487	229.117	17.0238	3.6914e-05	0.998044	0.00831703
25737	uc009qqe.1|uc009qqf.1	Nedd4	17999	367.361	363.192	330.657	250.325	16.971	3.79542e-05	1	0.00848072
7015	uc007tgn.1	Psmc6	67089	87.2397	84.9583	53.6163	50.2739	16.9274	3.88375e-05	1	0.00860696
19142	uc008zyz.1	Mdh2	17448	219.015	196.603	247.649	294.54	16.8681	4.007e-05	1	0.00880654
20554	uc009drh.1|uc009dri.1	Phb2	12034	135.243	141.04	185.65	194.613	16.853	4.03895e-05	1	0.00880654
3860	uc007kze.1	Lrrc59	98238	142	136.156	184.835	197.817	16.7501	4.26392e-05	1	0.00919171
24532	uc009nrh.1|uc009nri.1	Cox4i1	12857	378.683	352.717	438.15	459.317	16.7414	4.28359e-05	1	0.00919171
2016	uc007fxs.1	Rrp1	18114	150.848	123.747	167.275	212.241	16.6086	4.59412e-05	1	0.00974019
22566	uc009ilj.1|uc009ilk.1|uc009ill.1|uc009ilm.1	Serpinh1	12406	493.075	415.39	473.248	617.009	16.6016	4.61125e-05	1	0.00974019
24519	uc009nqj.1	Cotl1	72042	68.1753	58.2628	77.685	121.024	16.5377	4.76934e-05	1	0.00999601
1501	uc007ent.1|uc007enu.1|uc007env.1|uc007enw.1|uc007enx.1	Bclaf1	72567	49.8767	49.1488	22.31	28.3267	16.4179	5.08034e-05	1	0.0105659
2122	uc007gfi.1	Timm13	30055	85.7677	84.3761	93.1463	159.88	16.3922	5.14967e-05	1	0.0106284
17009	uc008tyl.1	Dhcr24	74754	102.068	107.169	139.266	161.145	16.357	5.24634e-05	1	0.0107459
16018	uc008rkz.1	Cenpe	229841	24.1337	20.2134	3.35508	10.8862	16.296	5.41789e-05	1	0.0110138
11317	uc008evt.1	Cdo1	12583	44.2994	39.0929	24.1075	15.4701	16.2321	5.60357e-05	1	0.0113063
3850	uc007kyh.1|uc007kyi.1|uc007kyj.1	3300001P08Rik	N/A	50.5068	48.9091	21.1777	30.1805	16.1922	5.72296e-05	1	0.0113986
1260	uc007dva.1	BC033430	N/A	21.155	27.628	8.37538	8.79592	16.1886	5.73368e-05	1	0.0113986
1749	uc007fge.1	Ppa1	67895	129.398	120.869	184.493	164.169	16.1329	5.90502e-05	1	0.0116536
4244	uc007lyn.1	Psmc5	19184	181.074	155.39	226.93	220.872	16.0549	6.15331e-05	1	0.0120556
15938	uc008rer.1	Fnbp1l	214459	47.5486	45.8682	20.0469	26.8178	15.9705	6.43369e-05	1	0.0125142
25724	uc009qox.1	Aldh1a2	19378	1.20267	0.737599	7.08513	12.2477	15.9035	6.6655e-05	1	0.0127812
3903	uc007lbm.1	AK078566	N/A	1.1064	0.728648	7.14459	11.5637	15.9035	6.6655e-05	1	0.0127812
3111	uc007ivh.1|uc007ivi.1|uc007ivj.1|uc007ivk.1|uc007ivl.1	Tcf7	21414	23.2603	26.9036	48.8918	48.7188	15.8527	6.84703e-05	1	0.0130368
27187	uc009upw.1|uc009upx.1	Smc1a	24061	75.3094	70.4096	31.5862	52.683	15.8347	6.91224e-05	1	0.013069
11216	uc008eoj.1	Ndufa2	17991	139.104	101.962	128.205	208.136	15.7127	7.37278e-05	1	0.0138429
2130	uc007gfv.1	Thop1	50492	66.9737	64.3304	78.3235	125.454	15.6435	7.64766e-05	1	0.01426
9423	uc007zvz.1	Sod1	20655	24.1124	15.4612	32.6574	48.5696	15.6201	7.74284e-05	1	0.0143386
21822	uc009gth.1	Rps11	27207	106.544	73.8936	164.463	99.0689	15.2314	9.51073e-05	1	0.0174926
5307	uc007oxu.1	Glrx5	73046	94.3481	93.0082	123.214	146.847	15.1584	9.88583e-05	1	0.0180597
26252	uc009sfd.1|uc009sfe.1	Zfp445	235682	33.6664	34.2843	11.0485	18.9777	15.1281	0.000100456	1	0.0182284
3846	uc007kxu.1	Nme1	18102	224.869	207.874	280.663	274.365	15.1033	0.000101785	1	0.0183465
15314	uc008plc.1|uc008pld.1|uc008ple.1	Shox2	20429	76.9423	83.6253	57.5725	40.9439	14.928	0.000111692	1	0.0199987
10595	uc008ctm.1|uc008ctn.1	Mrpl2	27398	54.6041	56.3578	76.381	99.9555	14.8498	0.000116423	1	0.0207087
3496	uc007jyy.1	Mybbp1a	18432	92.3835	90.2411	126.575	136.038	14.8263	0.000117878	1	0.0208305
8186	uc007wjs.1|uc007wjt.1	Cyc1	66445	111.82	113.235	135.8	177.809	14.7633	0.000121888	1	0.0213992
14118	uc008mij.1	Snrpb	20638	175.208	175.153	209.911	248.612	14.7308	0.000124004	1	0.0216304
26985	uc009ubb.1|uc009ubc.1|uc009ubd.1|uc009ube.1|uc009ubf.1|uc009ubg.1	Atrx	22589	22.4291	20.2514	4.00884	9.67122	14.6509	0.00012937	1	0.0224216
22713	uc009iur.1|uc009ius.1	Hbb-bh1	15132	692.689	660.094	982.922	575.55	14.585	0.000133978	1	0.0230724
19910	uc009bzk.1	1200009O22Rik	66873	63.5951	62.9104	84.619	109.562	14.4689	0.00014249	1	0.0243829
326	uc007bdy.1	Nol5	N/A	88.9418	85.8331	51.2336	59.6992	14.4437	0.000144415	1	0.0245568
19502	uc009awi.1|uc009awj.1	Asb4	65255	242.555	245.277	210.111	166.783	14.2833	0.000157255	1	0.0264557
14089	uc008mgd.1|uc008mge.1|uc008mgf.1	Bub1	12235	46.0238	45.1592	22.8846	24.4853	14.2769	0.000157789	1	0.0264557
13197	uc008kdw.1	Hoxd11	15431	83.1509	109.341	54.8028	70.1613	14.2682	0.000158517	1	0.0264557
10942	uc008drw.1	AW548124	N/A	152.091	151.968	90.2303	127.501	14.2334	0.00016148	1	0.0267849
8192	uc007wkf.1	Bop1	12181	63.0472	62.5014	80.3477	112.9	14.1774	0.000166354	1	0.0274251
23955	uc009mdp.1	Plvap	84094	25.2374	28.384	37.0678	62.3821	14.1417	0.00016954	1	0.0277809
8743	uc007xxa.1	Hoxc9	15427	1.8518	0.890568	10.0795	9.60685	14.073	0.00017585	1	0.0286413
10708	uc008dcj.1	BC018200	N/A	66.8578	47.8808	76.3514	103.003	14.0441	0.000178569	1	0.02891
11687	uc008fru.1	Atp5a1	11946	544.419	521.955	642.82	603.369	14.028	0.000180106	1	0.0289852
18194	uc008xje.1|uc008xjf.1	AK017756	N/A	38.5832	36.1236	18.2121	18.0666	13.9995	0.000182854	1	0.0292535
14624	uc008nll.1	Eif6	16418	65.0488	58.7241	78.0326	111.759	13.9766	0.000185099	1	0.0294384
18049	uc008wwy.1|uc008wwz.1	Cad	69719	62.49	71.9885	86.6844	114.894	13.8574	0.000197216	1	0.0311821
17708	uc008vuw.1	Srm	20810	35.164	37.5651	49.3027	76.1844	13.8181	0.000201392	1	0.0316572
14999	uc008ooa.1	Zfhx4	80892	27.3032	21.6689	10.098	8.8459	13.702	0.000214222	1	0.0334793
3904	uc007lbn.1|uc007lbo.1	Hoxb9	15417	1.17848	0.683783	8.35217	8.88945	13.5528	0.000231951	1	0.0360042
3386	uc007jqa.1|uc007jqb.1	Lsmd1	78304	58.1639	49.7315	61.7971	107.11	13.544	0.000233041	1	0.0360042
5401	uc007pex.1|uc007pey.1	Akt1	11651	130.737	126.169	153.653	192.832	13.4607	0.000243617	1	0.0374243
22381	uc009hxz.1|uc009hya.1|uc009hyb.1	Mfge8	17304	44.8584	42.5559	66.3173	76.6776	13.2219	0.000276703	1	0.0421311
15086	uc008oum.1|uc008oun.1|uc008ouo.1|uc008oup.1|uc008ouq.1|uc008our.1|uc008ous.1|uc008out.1	Evi1	N/A	60.2929	65.1167	37.8577	35.7647	13.2173	0.000277373	1	0.0421311
19516	uc009axf.1	Asns	27053	46.861	45.8769	87.9046	60.8433	13.0769	0.000298963	1	0.0450389
3453	uc007jve.1	Psmb6	19175	126.847	114.478	150.207	177.081	13.0713	0.000299849	1	0.0450389
14637	uc008nmo.1|uc008nmp.1|uc008nmq.1|uc008nmr.1|uc008nms.1|uc008nmt.1|uc008nmu.1|uc008nmv.1|uc008nmw.1	Rbm39	170791	66.4708	64.9938	38.1621	41.3326	13.0111	0.000309648	1	0.0462539
23373	uc009kob.1	H19	14955	2581.92	2319.38	2527.48	2737.31	12.9658	0.000317238	1	0.046939
2884	uc007iet.1	Xpo1	103573	84.5974	84.6102	67.8866	42.0373	12.9574	0.000318661	1	0.046939
25453	uc009pzt.1	Rplp1	56040	63.9486	33.5831	65.7852	88.7322	12.9528	0.000319443	1	0.046939
23748	uc009lnq.1|uc009lnr.1|uc009lns.1|uc009lnt.1|uc009lnu.1	Pcm1	18536	22.2415	20.7388	5.27871	11.0773	12.828	0.000341471	1	0.0499046
12743	uc008isp.1	Phpt1	75454	101.784	76.263	109.509	142.31	12.7985	0.000346897	1	0.0504251
2083	uc007gci.1	Ndufs7	75406	87.1595	86.7482	93.3873	153.988	12.7222	0.000361348	1	0.0522447
24006	uc009mhd.1|uc009mhe.1|uc009mhf.1	Mcm5	17218	167.824	155.322	196.856	222.83	12.6997	0.000365705	1	0.0525935
15421	uc008ptk.1	Crabp2	12904	387.033	382.676	476.483	439.815	12.6588	0.000373804	1	0.0534737
20228	uc009cuc.1|uc009cud.1|uc009cue.1	Cnbp	12785	354.573	351.981	455.845	390.598	12.6297	0.00037966	1	0.0540256
3287	uc007jhm.1|uc007jhn.1	Mfap4	76293	86.5726	93.0782	67.5922	51.0274	12.5326	0.00039991	1	0.0565342
27094	uc009uik.1|uc009uil.1	Ngfrap1	12070	275.45	250.402	313.906	332.444	12.5253	0.000401471	1	0.0565342
2887	uc007iex.1	AK143407	N/A	28.9279	26.3002	8.44439	16.0168	12.4977	0.000407447	1	0.0570785
21500	uc009fxo.1|uc009fxp.1	Psmc4	23996	153.254	145.869	195.601	194.733	12.3033	0.000452165	1	0.0630164
20149	uc009com.1|uc009con.1|uc009coo.1|uc009cop.1|uc009coq.1	Zfml	18139	20.0081	18.9902	4.56667	8.80115	12.2741	0.000459295	1	0.0636818
23669	uc009lih.1	Eif4ebp1	13685	25.2207	26.5526	38.6069	55.4249	12.2546	0.00046411	1	0.0640212
4387	uc007mjn.1	Galk1	14635	93.5202	89.1165	107.713	148.034	12.1955	0.000479043	1	0.0657457
23912	uc009mal.1	2810428I15Rik	66462	46.349	40.2143	47.8358	89.7492	12.1823	0.000482462	1	0.0658804
3811	uc007kva.1|uc007kvb.1	Dynll2	68097	85.3807	72.0066	109.139	115.652	12.1695	0.000485782	1	0.0660005
10725	uc008ddm.1	Clpp	53895	64.0289	60.2822	74.3172	111.36	12.1215	0.000498429	1	0.0668067
12259	uc008hgx.1|uc008hgy.1|uc008hgz.1|uc008hha.1|uc008hhb.1	Mphosph1	N/A	16.7937	15.2028	3.21005	7.2985	12.1189	0.000499129	1	0.0668067
4774	uc007nni.1|uc007nnj.1|uc007nnk.1	Arhgap5	11855	15.8579	15.5076	4.30764	5.99738	12.1189	0.000499129	1	0.0668067
19496	uc009avv.1	Peg10	170676	197.937	240.266	306.93	239.792	12.0867	0.000507837	1	0.0676373
6424	uc007rvv.1|uc007rvw.1|uc007rvx.1	Gpbp1	73274	32.9246	33.0259	18.3569	14.1678	12.0447	0.000519386	1	0.0688364
5632	uc007ptn.1	Zfp322a	218100	19.1882	17.5158	5.9529	7.00294	12.009	0.000529435	1	0.069826
18322	uc008xua.1|uc008xub.1|uc008xuc.1|uc008xud.1|uc008xue.1|uc008xuf.1	Pdgfra	18595	55.6661	51.5149	34.3645	28.7079	11.9827	0.000536961	1	0.0704749
16922	uc008tsg.1	Ift74	67694	22.9001	22.1279	6.99924	10.7354	11.9546	0.000545133	1	0.071057
24080	uc009mmh.1	D8Ertd738e	101966	160.718	140.684	186.358	206.657	11.9494	0.000546653	1	0.071057
21534	uc009fzz.1|uc009gaa.1	Hnrnpl	15388	269.874	284.769	341.982	334.1	11.9128	0.000557493	1	0.0721193
1328	uc007dzo.1|uc007dzp.1	Tgfb2	21808	10.0738	8.43358	1.97349	1.41576	11.8873	0.000565181	1	0.0727224
26614	uc009taw.1|uc009tax.1|uc009tay.1|uc009taz.1	Stag2	20843	23.5628	24.0261	7.44518	13.0449	11.8796	0.000567534	1	0.0727224
7088	uc007tly.1	Apex1	11792	85.2952	71.8071	118.972	104.863	11.8436	0.000578586	1	0.073537
1711	uc007fdd.1|uc007fde.1	Ranbp2	19386	27.7565	26.1042	7.69842	16.16	11.8412	0.000579331	1	0.073537
22564	uc009ilf.1	Mogat2	233549	32.067	38.6432	58.0334	59.5329	11.8114	0.000588699	1	0.0739115
20993	uc009eqs.1|uc009eqt.1|uc009equ.1	Bcat1	12035	29.1471	31.6598	51.6464	52.7091	11.8032	0.000591289	1	0.0739115
15417	uc008ptc.1	Hdgf	15191	114.067	111.916	152.013	152.713	11.797	0.000593249	1	0.0739115
7282	uc007uac.1	Nedd8	18002	207.359	183.657	264.009	229.495	11.7955	0.000593745	1	0.0739115
12298	uc008hjt.1	Hells	15201	43.7618	41.3343	23.3957	23.1983	11.7886	0.00059595	1	0.0739115
97	uc007amo.1|uc007amp.1	Col9a1	12839	23.4111	20.1179	8.79781	8.20207	11.6488	0.000642447	1	0.0789389
3585	uc007ket.1|uc007keu.1	Ywhae	22627	563.796	537.373	717.786	549.107	11.6464	0.000643278	1	0.0789389
3303	uc007jjf.1	Prr6	N/A	24.2429	20.3232	40.409	41.6895	11.6407	0.000645245	1	0.0789389
8193	uc007wkg.1	Scx	20289	33.1384	24.9856	12.3472	15.0817	11.5709	0.000669925	1	0.081589
8441	uc007xbi.1|uc007xbj.1	Scube1	64706	56.409	62.1819	78.2976	98.0493	11.5176	0.000689412	1	0.0835858
14949	uc008ojj.1|uc008ojk.1	Ogfr	72075	60.2278	54.4988	73.2364	97.5386	11.4772	0.000704536	1	0.0850381
24795	uc009ojk.1|uc009ojl.1	Ppan	235036	46.6181	46.2684	51.1779	94.1771	11.4535	0.000713591	1	0.0857483
25994	uc009rkb.1	Rrp9	27966	39.3838	35.2946	48.7529	72.0466	11.4405	0.000718597	1	0.0859678
8575	uc007xlo.1|uc007xlp.1|uc007xlq.1	Col2a1	12824	50.84	43.8673	25.804	28.0871	11.4287	0.000723164	1	0.086133
7127	uc007tor.1	Supt16h	114741	121.041	109.904	70.2576	94.4827	11.4197	0.000726699	1	0.0861743
7325	uc007ucr.1|uc007ucs.1|uc007uct.1	Zmym2	76007	30.8278	30.7014	12.3374	18.3653	11.3665	0.000747811	1	0.0882907
6382	uc007rsk.1|uc007rsl.1|uc007rsm.1|uc007rsn.1	Erbb2ip	59079	25.4609	25.0196	10.4469	12.3722	11.1814	0.000826196	1	0.0971211
25882	uc009rba.1|uc009rbb.1|uc009rbc.1|uc009rbd.1|uc009rbe.1	2610101N10Rik	67958	35.9537	33.7288	17.4825	18.8072	11.1008	0.000862899	1	0.100997
9868	uc008bcf.1	Stub1	56424	75.4567	73.8302	87.0434	124.837	11.051	0.000886414	1	0.103169
9809	uc008axv.1	Tbl3	213773	66.3674	62.6138	80.0641	108.286	11.0454	0.000889091	1	0.103169
22909	uc009jet.1|uc009jeu.1|uc009jev.1	Ipo7	233726	47.4869	47.1139	25.1215	28.7141	10.9464	0.000937842	1	0.108361
7590	uc007uwe.1	Kctd12	239217	24.0545	21.132	8.69146	9.68282	10.8741	0.000975179	1	0.112195
2048	uc007fzl.1|uc007fzm.1	Bsg	12215	162.349	144.557	176.818	217.032	10.8253	0.00100121	1	0.114702
21269	uc009fin.1	Calm3	12315	155.3	145.17	162.145	224.045	10.8098	0.00100966	1	0.115183
18251	uc008xnw.1|uc008xnx.1|uc008xny.1	Pds5a	71521	43.2926	44.2821	20.5963	28.3493	10.7603	0.001037	1	0.117564
13052	uc008jqq.1|uc008jqr.1|uc008jqs.1|uc008jqt.1	Rif1	51869	19.1835	18.4862	4.39882	9.85399	10.7563	0.00103923	1	0.117564
16290	uc008sgn.1	Zfp292	30046	16.9323	15.0811	4.14787	7.27379	10.7082	0.00106659	1	0.119703
14603	uc008njp.1|uc008njq.1	Chmp4b	75608	80.7754	58.4003	90.4987	108.869	10.7075	0.001067	1	0.119703
13196	uc008kdv.1	Hoxd12	15432	30.076	27.8216	17.1136	10.9397	10.6884	0.00107808	1	0.120447
2627	uc007hmq.1	Obfc2b	69917	53.4864	57.7057	85.4151	79.6688	10.6337	0.00111047	1	0.123048
19022	uc008zoz.1	Arl6ip4	65105	61.8281	48.9346	67.9563	96.7271	10.6337	0.00111047	1	0.123048
17580	uc008vna.1|uc008vnb.1	Rcc2	108911	229.481	220.864	258.228	294.715	10.5959	0.00113336	1	0.125073
20613	uc009dvr.1|uc009dvs.1|uc009dvv.1	Ccnd2	12444	118.416	116.153	91.5924	77.1846	10.5298	0.00117465	1	0.128892
9246	uc007zkb.1|uc007zkc.1|uc007zkd.1	C330027C09Rik	224171	23.8552	22.1678	8.24651	11.6312	10.5253	0.00117751	1	0.128892
8907	uc007ykc.1	Sdf2l1	64136	31.6816	24.9521	40.1184	56.8913	10.5097	0.00118749	1	0.129461
25813	uc009qvu.1|uc009qvv.1|uc009qvw.1|uc009qvx.1|uc009qvy.1|uc009qvz.1|uc009qwa.1|uc009qwb.1	Phip	83946	18.3864	17.3265	4.49479	8.60615	10.4699	0.00121337	1	0.131545
5047	uc007oit.1	Ahsa1	217737	152.068	122.311	181.491	174.229	10.4599	0.00121996	1	0.131545
8373	uc007wwz.1|uc007wxa.1|uc007wxb.1|uc007wxc.1	Rangap1	19387	64.2851	54.1102	79.142	93.5814	10.458	0.00122121	1	0.131545
14146	uc008mks.1|uc008mkt.1|uc008mku.1	1700037H04Rik	67326	41.7481	41.5131	48.4959	83.0717	10.3579	0.00128925	1	0.138323
21905	uc009gzm.1|uc009gzn.1|uc009gzo.1	Ldha	16828	86.7928	81.3393	100.365	132.28	10.2841	0.00134178	1	0.143216
25842	uc009qyh.1	Tbx18	76365	26.981	26.0603	13.635	10.7138	10.2791	0.00134544	1	0.143216
26026	uc009rml.1|uc009rmm.1	Gnai2	14678	191.293	177.074	202.755	257.186	10.2434	0.00137177	1	0.145446
24320	uc009ncl.1	E2f4	104394	71.1494	71.1074	90.0028	111.122	10.1993	0.00140491	1	0.148377
23946	uc009mcw.1|uc009mcx.1	Nr2f6	13864	61.2336	56.2892	61.4735	109.756	10.1852	0.00141574	1	0.148939
21689	uc009gkr.1	Ccne1	12447	70.0125	78.3625	105.514	102.212	10.1608	0.00143459	1	0.150338
2579	uc007hiz.1	Mars	216443	65.4637	68.2324	89.4303	101.043	10.1117	0.00147332	1	0.153559
25393	uc009puz.1	Cox5a	12858	82.0135	78.2485	103.098	119.286	10.1075	0.00147669	1	0.153559
21395	uc009fpt.1|uc009fpu.1	Zfp428	232969	35.3276	35.5747	43.3615	70.8208	10.0866	0.00149352	1	0.154714
14854	uc008odh.1	Rbm38	56190	41.3164	45.5491	50.5831	82.5661	10.0722	0.00150522	1	0.155214
13542	uc008kww.1|uc008kwx.1|uc008kwy.1|uc008kwz.1	Mdk	17242	424.736	466.04	470.349	560.122	10.0666	0.00150983	1	0.155214
4139	uc007lrt.1|uc007lru.1	Slc25a39	68066	76.0242	84.9174	98.9861	123.917	10.0544	0.00151987	1	0.155654
16150	uc008rve.1|uc008rvf.1	Zranb2	53861	55.1241	50.471	37.9769	26.292	10.0467	0.00152622	1	0.155715
21214	uc009ffd.1	Ube2m	22192	106.465	110.652	143.563	143.831	10.0153	0.00155243	1	0.157793
2564	uc007hhv.1	Cdk4	12567	505.935	518.069	633.533	538.032	9.98206	0.00158072	1	0.160068
24546	uc009nsc.1|uc009nsd.1	Slc7a5	20539	18.5945	20.1331	30.8817	41.2532	9.9607	0.00159917	1	0.160732
1806	uc007fja.1|uc007fjb.1|uc007fjc.1|uc007fjd.1	Ccar1	67500	34.9575	36.9399	16.6649	21.7103	9.9607	0.00159917	1	0.160732
9481	uc008aaq.1|uc008aar.1|uc008aas.1|uc008aat.1|uc008aau.1|uc008aav.1|uc008aaw.1|uc008aax.1|uc008aay.1|uc008aaz.1|uc008aba.1|uc008abb.1|uc008abc.1|uc008abd.1	Ttc3	22129	44.2145	40.3253	18.5398	28.8855	9.94367	0.00161404	1	0.161625
4617	uc007nax.1|uc007nay.1|uc007naz.1	Smc6	67241	19.6731	18.7732	5.92895	9.90027	9.92019	0.00163476	1	0.163096
23917	uc009mav.1|uc009maw.1	Isyna1	71780	97.7963	95.9954	111.389	149.821	9.9019	0.00165108	1	0.164119
23901	uc009lzr.1|uc009lzs.1|uc009lzt.1	Homer3	26558	53.407	53.5914	75.1905	83.3501	9.8766	0.00167394	1	0.165565
14824	uc008obf.1|uc008obg.1|uc008obh.1	Sall4	99377	15.1153	18.8906	30.5331	33.9426	9.87227	0.00167788	1	0.165565
5417	uc007pfv.1|uc007pfw.1|uc007pfx.1	Mta1	116870	102.549	118.692	136.782	156.05	9.81959	0.00172662	1	0.169755
23002	uc009jmk.1|uc009jml.1	Crym	12971	1.93864	1.19373	6.07009	10.187	9.76542	0.00177824	1	0.174197
2790	uc007hxk.1	Pold2	18972	54.855	48.5775	67.0939	87.2116	9.75151	0.00179176	1	0.174887
8184	uc007wjp.1	Exosc4	109075	31.7618	24.4444	36.2364	57.9746	9.73237	0.0018105	1	0.176081
20553	uc009drg.1	Emg1	14791	131.288	128.573	169.045	166.572	9.71771	0.00182501	1	0.176856
22012	uc009hgy.1|uc009hgz.1	Snrpa1	68981	105.168	89.285	129.912	130.054	9.6288	0.0019155	1	0.184962
23099	uc009jua.1|uc009jub.1|uc009juc.1	Maz	17188	136.43	141.974	158.476	197.508	9.62057	0.0019241	1	0.185131
24110	uc009moy.1	2310036O22Rik	68544	161.06	157.118	184.102	216.652	9.60276	0.00194285	1	0.18574
17788	uc008wby.1	5930403L14Rik	null	43.5673	50.8501	32.169	24.5887	9.60152	0.00194417	1	0.18574
24870	uc009opk.1|uc009opl.1|uc009opm.1	40793	235072	24.6152	21.4161	9.54511	11.0728	9.55786	0.00199095	1	0.18954
21849	uc009gvh.1|uc009gvi.1	Bax	12028	66.9077	60.3182	78.3173	102.788	9.51664	0.00203617	1	0.193164
24470	uc009nne.1|uc009nnf.1|uc009nng.1	Kars	85305	108.334	102.267	137.965	139.551	9.50631	0.00204766	1	0.193576
21261	uc009fia.1	Ap2s1	232910	112.603	91.0463	114.882	156.275	9.48212	0.00207485	1	0.195462
12542	uc008ibx.1|uc008iby.1|uc008ibz.1	Eif3s10	N/A	82.8127	68.5434	36.8813	66.3466	9.4745	0.00208347	1	0.195593
9021	uc007ytd.1|uc007yte.1|uc007ytf.1|uc007ytg.1	Eif4a2	13682	31.9192	39.3601	21.7342	17.2513	9.44505	0.0021172	1	0.198071
4532	uc007mut.1	Fasn	14104	96.0143	102.779	114.947	149.699	9.41985	0.00214649	1	0.200087
5943	uc007qmf.1	Edg3	N/A	47.0624	44.7705	29.7308	25.226	9.41384	0.00215354	1	0.200087
17509	uc008vhs.1	Id3	15903	122.452	113.077	127.822	177.829	9.34486	0.00223611	1	0.206934
2106	uc007gea.1|uc007geb.1	Csnk1g2	103236	136.22	136.017	149.816	198.269	9.3396	0.00224254	1	0.206934
7368	uc007ufw.1	Kpna3	16648	42.774	41.1393	24.8498	24.3935	9.31989	0.00226679	1	0.20846
16268	uc008sew.1|uc008sex.1	Casp8ap2	26885	18.2021	17.249	4.78358	9.20181	9.298	0.00229404	1	0.20954
14197	uc008mpn.1	Esf1	66580	17.6375	17.2254	4.82586	8.71556	9.298	0.00229404	1	0.20954
5776	uc007qbn.1|uc007qbo.1|uc007qbp.1|uc007qbq.1	Prpf4b	19134	30.0301	27.246	12.0449	17.4421	9.28458	0.00231091	1	0.21037
15738	uc008qql.1	Tbx15	21384	69.0647	86.01	61.8801	43.6631	9.25405	0.00234975	1	0.213189
13519	uc008kuf.1	Psmc3	19182	188.613	169.845	214.035	231.016	9.21663	0.00239827	1	0.216863
19625	uc009bfn.1	Cpa2	232680	76.717	72.864	59.6863	41.5925	9.19896	0.00242153	1	0.218212
1055	uc007dgf.1	Dnm3os	474332	11.0211	14.0696	4.93199	3.31659	9.19307	0.00242933	1	0.218212
8448	uc007xby.1	Parvb	170736	21.872	28.0017	40.065	44.5515	9.17856	0.00244866	1	0.218256
19906	uc009byy.1|uc009byz.1	Tax1bp1	52440	28.3714	26.3001	10.8006	15.8678	9.17455	0.00245404	1	0.218256
21574	uc009gde.1	Zfp260	26466	27.0754	26.9402	13.9096	12.7016	9.17455	0.00245404	1	0.218256
4829	uc007nrg.1|uc007nrh.1|uc007nri.1	C79407	217653	14.7969	15.2601	4.58251	6.48421	9.1507	0.00248623	1	0.219272
13838	uc008lmv.1	1110018M03Rik	N/A	17.2561	12.9074	6.6512	4.11218	9.1507	0.00248623	1	0.219272
21878	uc009gxj.1|uc009gxk.1	Grwd1	101612	49.6905	47.5003	62.6264	81.5876	9.14808	0.00248979	1	0.219272
24160	uc009msu.1|uc009msv.1	Irx3	16373	31.0763	29.5402	31.5133	66.5261	9.11182	0.00253963	1	0.222935
7277	uc007tzp.1|uc007tzq.1|uc007tzr.1	Ipo4	75751	47.6235	51.4634	65.5968	79.8396	9.07246	0.00259488	1	0.227048
12681	uc008iod.1|uc008ioe.1	Yme1l1	27377	23.7486	24.0658	12.4502	11.2782	8.99439	0.0027081	1	0.235646
7795	uc007vma.1|uc007vmb.1	Osr2	107587	16.2782	17.3107	9.49545	3.55466	8.99271	0.00271058	1	0.235646
15936	uc008rep.1	Dnttip2	99480	40.7863	36.6997	17.8882	27.3425	8.96306	0.00275494	1	0.238735
24249	uc009mxf.1|uc009mxg.1	Dok4	114255	13.9133	14.0097	21.4425	34.2556	8.94499	0.00278231	1	0.239819
3709	uc007knt.1	Nle1	217011	21.5689	19.5027	26.4201	48.0548	8.9431	0.00278519	1	0.239819
18492	uc008ygt.1|uc008ygu.1|uc008ygv.1|uc008ygw.1	Hnrpd	N/A	78.8301	81.0037	96.0466	122.349	8.93472	0.002798	1	0.240157
14064	uc008mef.1|uc008meg.1|uc008meh.1|uc008mei.1	Trpm7	58800	18.4886	18.3307	7.06382	7.98244	8.90967	0.00283665	1	0.242704
26291	uc009vey.1	DQ539915	N/A	121.392	97.8038	113.831	46.7476	8.88733	0.00287157	1	0.244917
4621	uc007nbf.1|uc007nbg.1	Mycn	18109	65.2424	73.244	86.232	106.141	8.87623	0.00288908	1	0.245635
3665	uc007kkh.1|uc007kki.1|uc007kkj.1	Wsb1	78889	54.9522	56.3843	37.8554	32.5451	8.86339	0.00290947	1	0.246594
6892	uc007taw.1|uc007tax.1	Bmpr1a	12166	42.2895	40.7605	25.6936	23.1805	8.85708	0.00291955	1	0.246674
17719	uc008vvv.1|uc008vvw.1	Pgd	110208	94.5058	100.024	124.612	133.184	8.79005	0.00302877	1	0.255106
11388	uc008fao.1|uc008fap.1|uc008faq.1|uc008far.1|uc008fas.1	Synpo	104027	24.0011	25.249	13.9774	10.4161	8.73738	0.00311752	1	0.260954
12163	uc008haa.1|uc008hab.1	Smc5	226026	25.9684	23.1756	8.17427	16.2451	8.73738	0.00311752	1	0.260954
8749	uc007xxl.1|uc007xxm.1|uc007xxn.1	Cbx5	12419	124.945	126.586	114.418	75.6194	8.72558	0.00313776	1	0.261839
12125	uc008gwn.1|uc008gwo.1|uc008gwp.1	Psat1	107272	35.8023	37.1183	61.5213	50.6358	8.66971	0.00323542	1	0.269157
11921	uc008gkj.1	Cox8a	12868	115.042	83.7273	113.967	148.351	8.63655	0.00329486	1	0.273261
15617	uc008qhe.1	Psmb4	19172	239.148	230.868	293.535	269.75	8.55726	0.00344146	1	0.284547
5017	uc007ogr.1	Eif2b2	217715	49.9514	46.6682	61.0031	81.0543	8.52359	0.00350573	1	0.288768
12932	uc008jhy.1	Lmx1b	16917	54.1307	57.8142	60.9446	99.4477	8.51511	0.0035221	1	0.288768
27174	uc009uos.1|uc009uot.1	Maged2	80884	111.039	102.156	84.9073	72.1918	8.50833	0.00353523	1	0.288768
24109	uc009mox.1	Asna1	56495	82.0612	74.9634	102.227	110.535	8.50833	0.00353523	1	0.288768
15993	uc008rjd.1|uc008rje.1	Rpl34	68436	21.7586	22.8063	29.4286	48.4223	8.49244	0.00356626	1	0.290425
2810	uc007hyz.1|uc007hza.1	Tbrg4	21379	36.106	39.068	53.2288	61.6125	8.48439	0.00358207	1	0.290836
3980	uc007lgw.1|uc007lgx.1	Psmd3	22123	69.7059	82.5175	95.5309	111.857	8.41222	0.00372707	1	0.301703
2422	uc007gxk.1	Dusp6	67603	116.037	118.821	158.936	142.674	8.38123	0.00379116	1	0.304808
3597	uc007kfo.1|uc007kfp.1	Nxn	18230	54.0955	50.4417	76.0561	74.1336	8.37686	0.00380029	1	0.304808
13198	uc008kdx.1	Hoxd10	15430	51.1247	59.9647	42.6493	28.5644	8.37556	0.003803	1	0.304808
3039	uc007ipv.1|uc007ipw.1|uc007ipx.1|uc007ipy.1|uc007ipz.1|uc007iqa.1	Zfp62	22720	13.0897	11.1872	3.43139	4.82881	8.37197	0.00381052	1	0.304808
15951	uc008rfm.1|uc008rfn.1	BC096391	N/A	45.4648	35.9526	46.3015	76.2168	8.33803	0.00388238	1	0.30964
2113	uc007geq.1|uc007ger.1	Plekhj1	78670	48.6108	46.1565	60.6361	78.14	8.32296	0.0039147	1	0.310366
8679	uc007xsx.1	6030408B16Rik	77717	3.47174	3.07139	0.412768	0.155956	8.31777	0.00392592	1	0.310366
2448	uc007gyz.1	Myf5	17877	3.48206	3.04177	0.224193	0.084706	8.31777	0.00392592	1	0.310366
18557	uc008ylp.1|uc008ylq.1|uc008ylr.1|uc008yls.1|uc008ylt.1	Zfp644	52397	15.8996	15.7412	5.27783	8.32703	8.2794	0.00400973	1	0.316067
15623	uc008qhr.1|uc008qhs.1|uc008qht.1|uc008qhu.1|uc008qhv.1	Psmd4	19185	97.2426	91.7442	112.702	135.799	8.24508	0.00408626	1	0.320979
21540	uc009gai.1|uc009gaj.1|uc009gak.1	Eif3k	73830	112.247	97.5587	132.441	141.006	8.24085	0.00409579	1	0.320979
10578	uc008csc.1	Rpo1-1	N/A	75.7055	68.5374	95.9208	101.97	8.22241	0.00413762	1	0.323321
20152	uc009coy.1|uc009coz.1	Cyp26b1	232174	77.5383	75.3626	65.092	41.6484	8.18146	0.00423207	1	0.329748
10398	uc008cgz.1|uc008cha.1|uc008chc.1|uc008chd.1|uc008che.1	Bat1a	53817	211.325	221.481	254.622	265.146	8.14608	0.00431544	1	0.335277
3622	uc007khq.1	BC128327	N/A	23.4363	35.9753	12.5313	18.9319	8.13287	0.00434698	1	0.33676
8729	uc007xvv.2|uc007xvw.2|uc007xvx.2|uc007xvy.2|uc007xvz.2|uc007xwb.2|uc009vat.1	Pcbp2	18521	163.82	162.9	200.446	203.765	8.12587	0.0043638	1	0.337097
1124	uc007dlt.1	AK028767	N/A	29.8224	33.1772	19.9501	15.0273	8.11256	0.00439596	1	0.338614
24095	uc009mnp.1	Calr	12317	304.357	267.48	374.822	296.345	8.06025	0.00452469	1	0.346348
24708	uc009oek.1	BC003348	N/A	23.4983	22.4335	13.2527	9.11701	8.0584	0.00452931	1	0.346348
17777	uc008way.1	Lrrc47	72946	58.2192	50.8014	67.7023	87.2531	8.05621	0.0045348	1	0.346348
11988	uc008gpi.1|uc008gpj.1	1810006K21Rik	69038	80.6936	67.5464	99.4312	102.811	8.03354	0.0045919	1	0.349722
8174	uc007wij.1|uc007wik.1	Puf60	67959	155.818	149.497	181	198.04	8.02154	0.00462243	1	0.351058
1964	uc007ftm.1|uc007ftn.1	Smarcb1	20587	101.664	108.023	132.922	139.144	7.99724	0.00468486	1	0.354105
24831	uc009omk.1|uc009oml.1	Spc24	67629	60.2212	49.9351	76.8006	78.5481	7.99502	0.00469062	1	0.354105
27233	uc009usl.1	Eif1ay	N/A	112.588	89.576	117.836	145.509	7.99069	0.00470184	1	0.354105
9701	uc008aqi.1	Ppp2r1a	51792	114.438	106.425	142.037	140.743	7.91142	0.00491238	1	0.368933
20128	uc009cne.1	Mthfd2	17768	42.7577	39.0151	63.2166	59.3606	7.89418	0.0049594	1	0.369391
5455	uc007piw.1|uc007pix.1|uc007piy.1	BC016423	null	18.1475	17.6024	5.44764	10.8383	7.89416	0.00495946	1	0.369391
2888	uc007iey.1|uc007iez.1|uc007ifa.1	mKIAA0570	N/A	17.1612	18.8463	6.2226	10.2196	7.89416	0.00495946	1	0.369391
9888	uc008bdl.1	Mrpl28	68611	82.9981	82.3	102.095	118.308	7.88409	0.00498716	1	0.370434
21588	uc009gdt.1	Polr2i	69920	56.4689	56.1712	65.5301	92.1901	7.8754	0.00501119	1	0.371198
19563	uc009bav.1	A430107O13Rik	214642	27.6693	25.2788	13.2745	15.3177	7.84348	0.00510044	1	0.376071
10690	uc008dau.1|uc008dav.1|uc008daw.1|uc008dax.1	Hdgfrp2	15193	62.7638	54.861	69.5551	95.3779	7.84194	0.00510479	1	0.376071
17386	uc008uzc.1	Serinc2	230779	13.8319	11.1458	5.26789	4.27304	7.83533	0.00512349	1	0.376423
11846	uc008gdx.1	Rnaseh2c	68209	94.8354	77.5423	88.9445	140.019	7.82642	0.00514879	1	0.377257
3868	uc007kzn.1	Col1a1	12842	36.2523	33.0814	18.54	20.5568	7.8093	0.0051978	1	0.379819
19319	uc009ame.1	Pdap1	231887	87.854	79.1983	104.962	116.587	7.80247	0.00521749	1	0.380114
10367	uc008cer.1|uc008ces.1|uc008cet.1|uc008ceu.1	Lsm2	27756	69.1554	72.9232	88.5256	104.071	7.79445	0.00524069	1	0.380114
26261	uc009sfv.1	Exosc7	66446	45.6351	42.3389	54.0138	75.4797	7.7933	0.00524402	1	0.380114
20437	uc009djn.1	Plxnd1	67784	28.6402	32.8484	36.8681	59.9268	7.76786	0.0053184	1	0.384475
1281	uc007dwi.1	Parp1	11545	145.355	138.497	179.467	174.296	7.72003	0.00546114	1	0.393543
25352	uc009prq.1	Ireb2	64602	42.6637	40.1453	25.8002	25.4933	7.71613	0.00547295	1	0.393543
15853	uc008qyd.1	Gnai3	14679	82.5591	78.4837	60.2866	55.1335	7.70256	0.00551425	1	0.395461
4701	uc007nhg.1	Dld	13382	60.3866	58.9361	44.1893	35.5836	7.69291	0.00554382	1	0.396529
9179	uc007zex.1	Adprh	11544	100.319	104.874	123.589	140.92	7.68052	0.00558202	1	0.398209
18087	uc008xaj.1|uc008xak.1|uc008xal.1|uc008xam.1|uc008xan.1|uc008xao.1	Ctbp1	13016	113.681	109.274	130.622	153.978	7.58583	0.0058829	1	0.418568
25941	uc009rft.1|uc009rfu.1	Anapc13	69010	31.611	24.2485	38.2143	51.0176	7.57656	0.00591322	1	0.419621
24563	uc009ntd.1|uc009nte.1	Cdt1	67177	38.0451	38.7207	48.5529	65.5072	7.57072	0.00593241	1	0.419881
2052	uc007fzr.1	Rnf126	70294	63.2837	66.274	72.9038	104.011	7.5606	0.00596582	1	0.421143
17412	uc008vbc.1|uc008vbd.1|uc008vbe.1	Rcc1	100088	52.9087	54.0897	74.1693	76.5153	7.54068	0.00603213	1	0.424715
17050	uc008ubd.1|uc008ube.1	Zcchc11	230594	34.011	36.8753	19.9064	22.1332	7.52641	0.00608011	1	0.426676
4962	uc007obt.1|uc007obu.1	Smoc1	64075	24.0079	24.9327	40.441	39.7881	7.52302	0.00609154	1	0.426676
546	uc007bvp.1	Ptma	19231	99.941	41.974	95.02	97.0379	7.51324	0.00612471	1	0.427891
14686	uc008nqx.1|uc008nqy.1	Top1	21969	44.3253	40.905	24.3245	29.1364	7.48826	0.00621025	1	0.432749
8307	uc007wrv.1	Lgals1	16852	159.801	137.502	118.023	117.193	7.46397	0.00629462	1	0.436603
22570	uc009ilr.1|uc009ils.1	Rps3	27050	104.525	92.4079	140.938	114.022	7.46304	0.00629786	1	0.436603
24825	uc009olu.1|uc009olv.1|uc009olw.1	Carm1	59035	103.152	109.884	127.973	145.092	7.42634	0.00642759	1	0.444457
5724	uc007pyk.1	Sox4	20677	95.1051	91.9348	60.6475	76.6803	7.41594	0.00646486	1	0.445894
23387	uc009kpd.1|uc009kpe.1|uc009kpf.1	Cdkn1c	12577	233.812	173.938	142.656	191.325	7.39234	0.00655023	1	0.449326
2576	uc007hiu.1	Dctn2	69654	94.8162	83.1578	111.218	122.203	7.38222	0.00658717	1	0.449326
271	uc007azw.1|uc007azx.1|uc007azy.1	Sf3b1	81898	67.9383	67.2391	49.8673	43.5238	7.38034	0.00659407	1	0.449326
7320	uc007ucf.1|uc007ucg.1	Mphosph8	75339	21.1749	20.2672	7.8432	12.1775	7.37955	0.00659699	1	0.449326
15671	uc008qmg.1	Bola1	69168	31.2252	23.3735	27.3535	58.7521	7.37934	0.00659772	1	0.449326
694	uc007cfi.1|uc007cfj.1|uc007cfk.1|uc007cfl.1	mKIAA0433	N/A	24.3423	24.3881	10.9881	13.9878	7.3715	0.00662657	1	0.450157
2033	uc007fyo.1	2610008E11Rik	72128	12.7868	13.397	3.96353	5.53952	7.36596	0.00664703	1	0.450415
7237	uc007twf.1|uc007twg.1	Prmt5	27374	84.0385	89.414	118.074	109.202	7.31231	0.0068484	1	0.460654
301	uc007bbs.1|uc007bbt.1|uc007bbu.1	Clk1	12747	25.6184	25.6295	12.9092	15.0431	7.31209	0.00684923	1	0.460654
847	uc007cqj.1|uc007cqk.1	Sox13	20668	13.9653	13.686	21.2258	31.1389	7.31209	0.00684923	1	0.460654
21834	uc009gud.1|uc009gue.1|uc009guf.1|uc009gug.1	Tead2	21677	173.633	176.383	197.834	227.435	7.26944	0.00701378	1	0.47055
13137	uc008jyk.1|uc008jyl.1|uc008jym.1|uc008jyn.1	Ppig	228005	18.3531	16.6649	7.2713	8.85481	7.252	0.0070822	1	0.473964
12439	uc008htt.1	Arl3	56350	99.5731	81.8827	111.725	125.141	7.24045	0.00712792	1	0.475846
19598	uc009bda.1|uc009bdb.1|uc009bdc.1	Impdh1	23917	23.1142	25.0319	34.587	42.5552	7.21192	0.00724209	1	0.482277
24820	uc009oli.1	Qtrt1	60507	33.3927	31.1348	36.0049	62.2562	7.18913	0.00733464	1	0.48724
21887	uc009gyb.1	Nomo1	211548	22.2458	22.8213	32.8537	40.9857	7.1389	0.00754296	1	0.498975
2186	uc007gjy.1|uc007gjz.1|uc007gka.1|uc007gkb.1|uc007gkd.1	Txnrd1	50493	92.7876	91.9488	124.244	115.665	7.13765	0.00754821	1	0.498975
17864	uc008wib.1|uc008wic.1|uc008wid.1	Akap9	100986	10.1531	9.14114	1.42756	4.82355	7.10336	0.00769395	1	0.507369
4914	uc007nxz.1	Mthfd1	108156	53.1904	50.8385	73.515	72.1249	7.08957	0.00775338	1	0.510044
11032	uc008dzf.1|uc008dzg.1	Kif5b	16573	36.55	33.2278	13.469	28.6537	7.0748	0.00781754	1	0.512037
2500	uc007hcs.1	Cct2	12461	312.759	291.113	394.653	305.058	7.07388	0.00782156	1	0.512037
23305	uc009kim.1|uc009kin.1	Psmd13	23997	74.1334	72.0711	99.2573	96.2576	7.06549	0.00785829	1	0.513199
21786	uc009gpx.1	Pold1	18971	58.9483	56.882	63.8642	96.1075	7.04451	0.00795085	1	0.517223
12010	uc008grc.1|uc008grd.1	Tmem132a	98170	82.1107	91.7727	87.0201	140.143	7.02553	0.00803559	1	0.517223
15838	uc008qxf.1	Alx3	11694	20.1876	19.3849	28.6529	37.449	7.02147	0.00805381	1	0.517223
10871	uc008dme.1|uc008dmf.1|uc008dmg.1	Emilin2	246707	19.3078	19.8597	27.5649	37.6303	7.02147	0.00805381	1	0.517223
23462	uc009kua.1	Shcbp1	20419	33.0305	33.2906	21.4376	17.816	7.02147	0.00805381	1	0.517223
15287	uc008pjn.1	Dhx36	72162	33.0862	33.4738	17.5564	20.9251	7.02147	0.00805381	1	0.517223
4597	uc007mzp.1	Rhob	11852	21.233	18.0865	27.2399	39.4395	7.02147	0.00805381	1	0.517223
10304	uc008cai.1	Wdr46	57315	34.4552	31.5489	43.4373	57.06	7.01338	0.00809027	1	0.518334
10359	uc008ceb.1|uc008cec.1|uc008ced.1|uc008cee.1|uc008cef.1|uc008ceg.1	Ehmt2	110147	90.6908	91.4936	104.279	132.164	6.99561	0.00817098	1	0.522081
2383	uc007guw.1	Snrpf	69878	64.013	30.7727	52.1868	82.8038	6.99202	0.00818739	1	0.522081
6897	uc007tbi.1	Wapal	218914	31.3572	30.7067	15.3899	20.5946	6.98125	0.00823681	1	0.523997
21345	uc009fmz.1|uc009fna.1|uc009fnb.1|uc009fnc.1	Tomm40	53333	29.2746	28.8533	35.8157	53.6114	6.97386	0.00827088	1	0.524929
8937	uc007ymr.1|uc007ymt.1	Dgcr6	13353	38.2492	33.3158	47.3006	58.6969	6.96673	0.00830392	1	0.525156
21729	uc009gmt.1	Etfb	110826	83.2533	59.0283	90.6733	99.1365	6.96414	0.00831594	1	0.525156
11047	uc008eal.1|uc008eam.1	Thoc1	225160	28.9393	28.619	17.7616	15.2993	6.95724	0.00834805	1	0.525156
2923	uc007ihx.1|uc007ihy.1|uc007ihz.1|uc007iia.1	Psme4	103554	25.6528	28.1416	13.9374	16.3256	6.95362	0.00836496	1	0.525156
18189	uc008xiy.1	Lap3	66988	52.3381	49.4808	70.4095	72.4856	6.9509	0.00837772	1	0.525156
12280	uc008hin.1	Kif11	16551	37.4527	33.5755	16.7933	25.7517	6.94806	0.008391	1	0.525156
2952	uc007ikc.1	Fgf18	14172	3.44929	2.06479	0.476569	0.321867	6.93147	0.0084692	1	0.526395
18920	uc008zgx.1	AK006202	N/A	2.94324	2.39879	0.1132	0.190296	6.93147	0.0084692	1	0.526395
10553	uc008cpy.1|uc008cpz.1|uc008cqa.1|uc008cqb.1|uc008cqc.1|uc008cqd.1|uc008cqi.1	Runx2	12393	2.56887	2.2512	0.234593	0.231034	6.93147	0.0084692	1	0.526395
7703	uc007vep.1|uc007veq.1|uc007ver.1|uc007ves.1|uc007vet.1|uc007veu.1|uc007vev.1	Nipbl	71175	14.795	14.5662	4.48184	8.85349	6.90797	0.00858122	1	0.530916
12594	uc008igc.1|uc008igd.1	Upf2	326622	15.139	14.611	3.7037	8.72291	6.90797	0.00858122	1	0.530916
5986	uc007qot.1|uc007qou.1|uc007qov.1|uc007qow.1|uc007qox.1|uc007qoy.1	Rnf44	105239	64.2313	73.5214	79.5307	104.68	6.86335	0.00879814	1	0.543095
11156	uc008ejt.1|uc008eju.1	D0H4S114	27528	114.304	111.404	114.048	59.0892	6.81343	0.00904747	1	0.556774
21583	uc009gdn.1	Zfp146	26465	56.7753	51.4711	28.1414	45.2419	6.81078	0.00906093	1	0.556774
5302	uc007oxh.1	Gsc	14836	20.7591	19.1217	11.6108	8.45272	6.79596	0.00913643	1	0.559512
3354	uc007jnm.1	Ntn1	18208	13.1834	9.16819	3.99066	4.21992	6.79392	0.00914688	1	0.559512
1667	uc007ezx.1	Prep	19072	75.0583	77.9658	104.525	96.8491	6.78502	0.00919259	1	0.560772
23962	uc009meb.1|uc009mec.1	Pgls	66171	50.7886	53.1717	50.047	95.0697	6.78185	0.00920896	1	0.560772
12657	uc008ilx.1	Commd3	12238	34.4454	34.0805	24.3752	17.1222	6.7582	0.00933176	1	0.566888
15444	uc008pva.1|uc008pvb.1	Pmf1	67037	92.3147	90.0208	111.244	124.009	6.75447	0.00935134	1	0.566888
23884	uc009lyd.1	Ndufa13	67184	66.4449	55.9502	66.7225	99.1466	6.74862	0.00938202	1	0.567476
4432	uc007mnd.1|uc007mne.1|uc007mnf.1|uc007mng.1	40795	53860	152.377	159.917	193.549	186.152	6.69288	0.00967989	1	0.584186
11833	uc008gcy.1|uc008gcz.1	Drap1	66556	112.676	101.957	128.732	142.767	6.68677	0.00971308	1	0.584883
11637	uc008fnp.1|uc008fnq.1|uc008fnr.1|uc008fns.1|uc008fnt.1|uc008fnu.1|uc008fnv.1	Tcf4	21413	39.7225	38.1716	22.8655	25.5261	6.68083	0.00974552	1	0.585533
426	uc007blr.1	Aamp	227290	106.602	100.879	126.233	137.937	6.65974	0.00986151	1	0.591188
23948	uc009mdb.1	5430437P03Rik	68251	66.9166	57.112	79.6325	88.0055	6.65546	0.00988525	1	0.5913
19474	uc009auh.1|uc009aui.1|uc009auj.1	Pds5b	100710	24.1659	23.5388	12.6081	13.1234	6.64047	0.00996879	1	0.59399
26162	uc009rxp.1	Trim71	636931	15.0276	16.9582	24.0718	32.1677	6.62911	0.0100325	1	0.59399
8970	uc007ypc.1|uc007ypd.1	B3gnt5	108105	16.9861	17.2115	8.35475	8.08292	6.62777	0.0100401	1	0.59399
927	uc007cwh.1|uc007cwi.1|uc007cwj.1	Aspm	12316	18.2707	15.8432	4.92101	11.3241	6.62777	0.0100401	1	0.59399
11289	uc008eug.1|uc008euh.1|uc008eui.1	Dpysl3	22240	8.87044	7.0524	11.7146	21.8644	6.62777	0.0100401	1	0.59399
19184	uc009act.1	Gnb2	14693	185.451	182.015	205.862	234.031	6.6125	0.0101265	1	0.597796
19278	uc009ajk.1	Actb	11461	561.999	381.573	518.988	539.862	6.60623	0.0101623	1	0.5986
24448	uc009nlp.1	Exosc6	72544	45.3535	46.2787	60.5477	68.0726	6.59667	0.010217	1	0.600514
19300	uc009akw.1|uc009akx.1	Jtv1	N/A	55.7168	51.8064	69.0561	79.9939	6.56889	0.0103777	1	0.606077
26257	uc009sfk.1|uc009sfl.1|uc009sfm.1	Kif15	209737	21.4487	19.6035	8.41404	13.0412	6.56844	0.0103803	1	0.606077
10872	uc008dmh.1|uc008dmi.1|uc008dmj.1	Smchd1	74355	20.0233	21.0558	8.65991	12.052	6.56844	0.0103803	1	0.606077
10313	uc008cav.1|uc008caw.1	Slc39a7	14977	65.6957	60.481	74.2204	95.7359	6.56484	0.0104013	1	0.606077
21117	uc009ezx.1|uc009ezy.1|uc009ezz.1	Epn1	13854	66.1001	67.4463	77.891	99.5612	6.53417	0.0105822	1	0.613751
25413	uc009pwk.1	Islr	26968	11.2449	9.45722	3.61768	3.04316	6.52679	0.0106262	1	0.613751
1709	uc007fcx.1|uc007fcy.1	Gcc2	70297	10.2841	9.55237	2.44488	4.70692	6.52679	0.0106262	1	0.613751
19927	uc009cai.1	Gars	353172	90.088	91.9436	131.88	101.562	6.51703	0.0106846	1	0.613751
4769	uc007nmz.1	Hectd1	207304	32.6968	28.1612	15.1682	21.1083	6.5166	0.0106872	1	0.613751
4218	uc007lwq.1|uc007lwr.1|uc007lws.1	Cdc27	217232	30.7938	29.5289	17.1938	19.1613	6.5166	0.0106872	1	0.613751
24298	uc009nba.1	1110019N10Rik	N/A	23.7497	19.344	31.6233	38.2929	6.51416	0.0107019	1	0.613751
14008	uc008lzf.1	2310003F16Rik	67693	173.918	127.977	161.851	206.272	6.51205	0.0107146	1	0.613751
1745	uc007fga.1	Eif4ebp2	13688	74.4293	86.9509	98.1335	112.429	6.49065	0.0108444	1	0.619871
10464	uc008cln.1	Ppp1r11	76497	66.0369	61.858	92.4637	79.5734	6.47667	0.0109299	1	0.623445
977	uc007czy.1|uc007czz.1|uc007daa.1|uc007dab.1	Dhx9	13211	116.675	109.731	98.0477	78.3452	6.47143	0.0109622	1	0.623969
16541	uc008sur.1	Sec61b	66212	12.8133	5.97158	8.95923	28.5883	6.45616	0.0110568	1	0.628032
17389	uc008uzf.1	Wdr57	N/A	102.467	90.7428	128.231	118.186	6.41427	0.0113207	1	0.641436
4503	uc007mta.1	Mrpl12	56282	30.197	30.3152	46.0245	44.8415	6.40972	0.0113498	1	0.641436
4098	uc007lom.1|uc007lon.1	Psme3	19192	86.579	90.8586	132.895	96.2982	6.40749	0.011364	1	0.641436
6830	uc007swk.1|uc007swl.1|uc007swm.1|uc007swn.1|uc007swo.1|uc007swp.1|uc007swq.1	Pbrm1	66923	34.8883	35.5625	21.0098	22.6816	6.39869	0.0114204	1	0.641943
19049	uc008zrs.1	Aacs	78894	22.7519	20.6379	30.9142	40.1059	6.39869	0.0114204	1	0.641943
16529	uc008stt.1	Anp32b	67628	47.1389	36.523	57.7762	62.2596	6.38633	0.0115002	1	0.645087
16316	uc008shz.1	Bag1	12017	104.787	96.8524	122.58	132.769	6.38165	0.0115306	1	0.645453
7901	uc007vtw.1	Ndufb9	66218	128.132	115.902	156.525	146.425	6.3762	0.0115661	1	0.6461
9160	uc007zdh.1	Golgb1	224139	17.5414	16.6203	6.31062	11.2999	6.36158	0.0116618	1	0.650102
3884	uc007lam.1	Ngfr	18053	5.01099	4.43929	6.25255	16.8871	6.3371	0.0118238	1	0.656399
15226	uc008pep.1|uc008peq.1	Lhfp	108927	31.3167	26.9475	16.8499	17.445	6.33389	0.0118452	1	0.656399
3477	uc007jxo.1	6330403K07Rik	103712	53.7882	49.432	42.2509	28.3965	6.33354	0.0118476	1	0.656399
19247	uc009ahg.1|uc009ahh.1	Psmg3	66506	32.0367	29.0053	42.3081	50.2587	6.32474	0.0119065	1	0.656968
17481	uc008vfx.1|uc008vfy.1|uc008vfz.1	D4Wsu53e	27981	73.7112	80.0457	51.2152	61.5331	6.32086	0.0119326	1	0.656968
21587	uc009gds.1	Tbcb	66411	90.3761	75.6991	96.4447	119.267	6.31933	0.0119429	1	0.656968
24085	uc009mmr.1	Ier2	15936	40.4806	40.2123	47.3506	67.5388	6.31622	0.0119638	1	0.656968
18088	uc008xap.1|uc008xaq.1	Maea	59003	93.0849	88.405	109.728	121.671	6.31393	0.0119793	1	0.656968
13790	uc008ljf.1|uc008ljg.1	Lmo2	16909	24.7011	20.7541	10.9491	13.9809	6.30516	0.0120387	1	0.658889
26455	uc009srg.1|uc009srh.1|uc009sri.1|uc009srj.1	Usp9x	22284	16.1083	16.1312	5.4145	10.059	6.29056	0.0121382	1	0.662993
9715	uc008arf.1	Zfp760	240034	8.87104	8.68584	2.38199	3.71352	6.27898	0.0122179	1	0.664778
2637	uc007hnl.1	Pa2g4	18813	59.8104	60.2281	88.8507	73.1179	6.27865	0.0122201	1	0.664778
20572	uc009dso.1|uc009dsp.1|uc009dsq.1	Mlf2	30853	42.4881	39.3064	50.9602	65.337	6.25141	0.0124095	1	0.673724
17458	uc008vec.1	Sh3bgrl3	73723	88.0287	72.9245	100.277	109.499	6.24461	0.0124572	1	0.674959
2754	uc007huo.1|uc007hup.1	Sf3a1	67465	72.8365	80.6024	102.728	97.8405	6.24084	0.0124837	1	0.675044
7545	uc007usk.1	AK158300	N/A	18.5766	20.0318	8.38338	11.927	6.22905	0.0125671	1	0.676847
20322	uc009czu.1	Lrig1	16206	20.6896	17.5861	11.167	9.27774	6.22905	0.0125671	1	0.676847
24093	uc009mnj.1	Gadd45gip1	102060	56.3343	41.7709	59.9541	76.3271	6.19835	0.0127869	1	0.687316
21255	uc009fhu.1	Tmem160	69094	29.2861	24.5929	34.1337	48.5463	6.18537	0.0128811	1	0.691003
2057	uc007gab.1|uc007gac.1|uc007gad.1	Ptbp1	19205	63.2116	53.0582	67.512	88.9575	6.18087	0.0129139	1	0.691392
19882	uc009bxm.1|uc009bxn.1|uc009bxo.1|uc009bxp.1|uc009bxq.1	Hnrnpa2b1	53379	157.17	155.775	124.607	128.669	6.15046	0.0131378	1	0.70199
19344	uc009ano.1	Gtf3a	66596	46.3488	41.9857	62.0036	61.6988	6.14293	0.0131938	1	0.703593
21056	uc009evh.1|uc009evi.1	Prpf31	68988	55.781	49.2703	67.2797	77.3669	6.13366	0.0132632	1	0.705892
11858	uc008gfj.1	AK019083	N/A	36.2284	28.1512	15.5482	22.9176	6.12899	0.0132983	1	0.705892
16539	uc008sun.1|uc008suo.1|uc008sup.1	Tgfbr1	21812	45.0943	43.9537	33.9322	25.3441	6.12342	0.0133402	1	0.705892
9448	uc007zxu.1|uc007zxv.1|uc007zxw.1|uc007zxx.1	Gart	14450	66.1515	64.2031	90.8597	81.5692	6.12296	0.0133437	1	0.705892
24784	uc009oiu.1|uc009oiv.1	5730601F06Rik	77519	55.8675	56.3771	41.0027	37.4043	6.11711	0.013388	1	0.705892
4610	uc007nao.1	Osr1	23967	21.3045	14.5793	9.80989	7.77854	6.11637	0.0133936	1	0.705892
21063	uc009evz.1|uc009ewa.1	Rps9	76846	91.1801	88.7026	105.115	124.878	6.11277	0.0134209	1	0.705955
23886	uc009lyf.1|uc009lyg.1|uc009lyh.1|uc009lyi.1	Gatad2a	234366	65.6501	70.678	84.7947	95.9823	6.10763	0.01346	1	0.706636
398	uc007bjr.1|uc007bjs.1|uc007bjt.1	Atic	108147	33.0336	31.4445	49.0761	46.2646	6.08291	0.0136496	1	0.713817
13267	uc008kjh.1	Timm10	30059	31.9249	32.2449	40.3178	54.5399	6.08291	0.0136496	1	0.713817
5509	uc007pmy.1|uc007pmz.1|uc007pna.1|uc007pnb.1|uc007pnc.1	Arid4b	94246	7.50569	7.59966	1.99845	3.3503	6.05946	0.013832	1	0.721962
3894	uc007lay.1|uc007laz.1	Igf2bp1	140486	91.9168	97.6666	131.782	109.352	6.04897	0.0139144	1	0.722825
9872	uc008bck.1	9530058B02Rik	N/A	4.00498	4.01473	8.47766	12.8541	6.04039	0.0139822	1	0.722825
18168	uc008xhd.1|uc008xhe.1|uc008xhf.1|uc008xhg.1	A230054D04Rik	N/A	10.8343	9.65483	2.3774	6.4827	6.04039	0.0139822	1	0.722825
26611	uc009tao.1|uc009tap.1|uc009taq.1	Thoc2	331401	10.8866	10.4046	3.00733	4.66113	6.04039	0.0139822	1	0.722825
11049	uc008eaq.1|uc008ear.1	Rock1	19877	10.5361	9.63541	3.2507	4.68197	6.04039	0.0139822	1	0.722825
3216	uc007jcq.1	Rnf187	108660	130.405	138.814	145.199	183.567	6.03021	0.0140631	1	0.725617
26605	uc009taa.1|uc009tab.1|uc009tac.1	Cul4b	72584	31.8791	32.8164	24.6896	14.8027	6.00994	0.0142255	1	0.732602
6011	uc007qrc.1|uc007qrd.1|uc007qre.1	Dbn1	56320	194.693	179.414	207.686	236.06	5.99755	0.0143257	1	0.736359
2132	uc007gfx.1|uc007gfy.1	Map2k2	26396	96.0627	95.6512	102.819	140.126	5.99308	0.0143621	1	0.736826
2129	uc007gft.1|uc007gfu.1	Sgta	52551	84.0502	84.6576	98.739	117.74	5.98439	0.014433	1	0.739064
76	uc007alc.1	Mcm3	17215	162.001	149.401	192.844	182.209	5.97954	0.0144728	1	0.7397
23929	uc009mbn.1	Pik3r2	18709	46.2974	45.358	51.847	74.5988	5.97227	0.0145325	1	0.740809
2909	uc007igq.1|uc007igr.1|uc007igs.1|uc007igt.1	Smek2	104570	22.1177	21.6362	7.7902	15.6992	5.97024	0.0145493	1	0.740809
27116	uc009ukc.1	Mum1l1	245631	14.6737	14.8687	7.2097	7.49789	5.95371	0.0146863	1	0.74638
21038	uc009eub.1|uc009euc.1|uc009eud.1	2810474O19Rik	67246	11.8216	11.784	4.16085	6.25272	5.93978	0.0148029	1	0.750892
15118	uc008oxk.1|uc008oxl.1|uc008oxn.1	Fxr1	14359	44.066	41.5196	26.2916	31.1632	5.92211	0.0149521	1	0.757039
17196	uc008ule.1	Slc2a1	20525	60.5119	60.6159	71.0383	92.0839	5.91876	0.0149805	1	0.757061
19900	uc009byo.1|uc009byp.1|uc009byr.1	U20367	N/A	33.0822	33.489	24.1463	17.0838	5.89546	0.01518	1	0.76571
7544	uc007usi.1|uc007usj.1	Akap11	219181	17.8731	19.0691	7.7151	10.5136	5.8897	0.0152297	1	0.766787
26939	uc009txz.1|uc009tya.1|uc009tyb.1|uc009tyc.1|uc009tyd.1	Ogt	108155	44.5314	46.8614	33.0208	28.9701	5.88169	0.0152991	1	0.768852
17960	uc008wqs.1	Tomm7	66169	89.4088	34.2509	93.9326	70.3386	5.87723	0.0153379	1	0.769056
10203	uc008bsm.1	Ppil1	68816	82.8491	81.642	96.7255	114.731	5.87469	0.0153601	1	0.769056
16338	uc008sjk.1|uc008sjl.1	Oprs1	N/A	32.3255	35.1402	45.0108	52.9298	5.859	0.0154976	1	0.773789
6357	uc007rqg.1|uc007rqh.1|uc007rqi.1	Smn1	20595	38.2269	38.8407	53.2495	56.8065	5.85414	0.0155405	1	0.773789
18934	uc008zhq.1	Ddx54	71990	41.1705	35.9685	45.4004	64.5939	5.85414	0.0155405	1	0.773789
19898	uc009byn.1	Hoxa11	15396	49.5223	55.2169	89.6498	53.0438	5.84558	0.0156162	1	0.776132
24829	uc009omd.1|uc009ome.1|uc009omf.1	Smarca4	20586	152.919	155.615	173.627	198.354	5.83654	0.0156967	1	0.7787
3070	uc007isf.1|uc007isg.1|uc007ish.1	Canx	12330	177.002	172.662	168.278	121.451	5.83204	0.0157369	1	0.779264
11881	uc008ghl.1	Sac3d1	66406	28.4739	26.0474	30.5056	50.9953	5.80614	0.0159703	1	0.787252
25821	uc009qwo.1|uc009qwp.1	Ttk	22137	24.7994	24.0506	12.7053	14.593	5.80047	0.0160219	1	0.787252
12777	uc008ivd.1|uc008ive.1	Pmpca	66865	52.8642	47.0462	65.6662	70.5897	5.80007	0.0160256	1	0.787252
25804	uc009qva.1|uc009qvb.1|uc009qvc.1|uc009qvd.1|uc009qve.1|uc009qvf.1	Senp6	215351	22.2275	22.5186	10.7811	14.4618	5.79469	0.0160747	1	0.787252
1261	uc007dvc.1	AK080656	N/A	48.0881	50.9427	45.8176	22.1498	5.788	0.0161359	1	0.787252
27093	uc009uij.1	Wbp5	22381	57.4558	48.094	35.6442	36.8199	5.7842	0.0161708	1	0.787252
18632	uc008yrm.1|uc008yrn.1|uc008yro.1|uc008yrp.1	Pus1	56361	24.6231	24.7684	30.8942	45.5478	5.7842	0.0161709	1	0.787252
2103	uc007gdv.1|uc007gdw.1	D10Bwg1364e	N/A	61.7698	69.5689	65.6014	108.331	5.78294	0.0161824	1	0.787252
9477	uc008aae.1|uc008aaf.1	Sim2	20465	5.90536	6.48235	1.53343	1.01416	5.78234	0.016188	1	0.787252
11979	uc008goq.1|uc008gor.1|uc008gos.1	Incenp	16319	87.5055	79.7074	105.971	108.613	5.78219	0.0161894	1	0.787252
26648	uc009tdr.1	2610018G03Rik	70415	17.8712	15.5623	9.73277	7.30506	5.77657	0.0162412	1	0.788136
21797	uc009gqw.1	Nup62	18226	88.8494	87.3347	105.501	117.887	5.7739	0.0162659	1	0.788136
25728	uc009qpd.1|uc009qpe.1|uc009qpf.1|uc009qpg.1|uc009qph.1|uc009qpi.1|uc009qpj.1|uc009qpk.1	Tcf12	21406	76.9821	74.8933	57.4399	55.848	5.76052	0.0163902	1	0.79274
25098	uc009pcb.1	DQ567485	N/A	4.33121	2.64546	13.1899	5.80872	5.75406	0.0164506	1	0.792826
12481	uc008hwx.1	Dusp5	240672	3.34114	3.77715	5.7569	12.6451	5.75406	0.0164506	1	0.792826
11883	uc008gho.1	Arl2	56327	43.1747	36.2925	46.9169	64.7681	5.73028	0.0166748	1	0.802201
24731	uc009ogb.1|uc009ogc.1	BC017612	170748	17.1568	14.5338	20.7132	32.6434	5.69095	0.0170526	1	0.818917
16510	uc008ssk.1|uc008ssl.1	Exosc3	66362	33.3182	27.4352	37.0333	52.4544	5.68048	0.0171547	1	0.822359
21817	uc009gsx.1|uc009gsy.1	Nosip	66394	40.5295	34.4149	40.0725	67.1937	5.65573	0.0173985	1	0.83257
7891	uc007vtf.1|uc007vtg.1|uc007vth.1	Atad2	70472	24.6086	25.3352	14.0668	14.8476	5.64995	0.0174558	1	0.83384
21510	uc009fyf.1|uc009fyg.1	Timm50	66525	77.2124	73.0967	98.8249	95.2187	5.64335	0.0175217	1	0.835508
21239	uc009fgq.1|uc009fgr.1|uc009fgs.1	Gltscr2	68077	23.3943	12.5515	25.0873	33.9271	5.62414	0.0177148	1	0.841896
4841	uc007nsd.1|uc007nse.1|uc007nsf.1|uc007nsg.1|uc007nsh.1	Sdccag1	66244	10.6319	11.4783	2.7666	6.29923	5.62383	0.0177179	1	0.841896
24564	uc009ntf.1|uc009ntg.1|uc009nth.1	Aprt	11821	54.7908	55.4577	65.454	82.9928	5.61731	0.0177839	1	0.843549
14046	uc008mck.1|uc008mcl.1|uc008mcn.1	Dut	110074	54	50.0341	83.7297	57.1263	5.60919	0.0178665	1	0.845836
15939	uc008res.1	AK152002	N/A	41.5448	37.0701	18.7223	33.4418	5.60497	0.0179096	1	0.845836
18451	uc008ydx.1|uc008ydy.1|uc008ydz.1|uc008yea.1|uc008yeb.1|uc008yec.1	40797	52398	111.17	114.495	143.986	134.492	5.59487	0.0180131	1	0.845836
13200	uc008kdz.1	Hoxd9	15438	42.1089	65.5152	36.4204	39.7697	5.59362	0.018026	1	0.845836
15479	uc008pyl.1	Krtcap2	66059	82.9863	76.0392	100.158	103.598	5.59289	0.0180335	1	0.845836
16291	uc008sgo.1|uc008sgp.1	Zfp292	30046	14.638	10.2619	2.26879	8.67732	5.59072	0.0180559	1	0.845836
18614	uc008ypq.1|uc008ypr.1	Gtpbp6	107999	20.3709	19.5918	21.4449	43.4572	5.5887	0.0180767	1	0.845836
17306	uc008ute.1	Adprhl2	100206	31.8118	34.0298	37.5126	57.6524	5.58775	0.0180865	1	0.845836
9793	uc008awe.1|uc008awf.1	1700012G19Rik	N/A	23.1517	24.8537	30.1795	44.3992	5.58371	0.0181283	1	0.845836
19593	uc009bct.1	Snd1	56463	86.8787	80.4086	99.4757	113.753	5.5821	0.0181449	1	0.845836
3483	uc007jxz.1	6720460F02Rik	N/A	46.4055	46.7222	59.9993	68.4502	5.56639	0.0183084	1	0.851988
24572	uc009ntv.1	Cdh15	12555	2.43411	1.85814	0.18182	0.426657	5.54518	0.0185317	1	0.855019
17229	uc008unx.1	Col9a2	12840	2.12425	1.56242	0.424823	0.288062	5.54518	0.0185317	1	0.855019
19150	uc008zzq.1	Upk3b	100647	0.222552	0.252303	1.2615	3.3321	5.54518	0.0185317	1	0.855019
3889	uc007las.1	Phospho1	237928	0.316735	0.499767	1.23456	2.90066	5.54518	0.0185317	1	0.855019
19902	uc009byt.1	AK033508	N/A	2.51913	1.07108	0.469415	0.122157	5.54518	0.0185317	1	0.855019
24121	uc009mpo.1	Vps35	65114	49.9012	52.5146	42.9176	29.3122	5.52052	0.0187947	1	0.865678
20164	uc009cpu.1|uc009cpv.1	Cct7	12468	60.7211	58.0886	80.2203	78.3786	5.50926	0.018916	1	0.867975
18577	uc008ynj.1|uc008ynk.1|uc008ynl.1|uc008ynm.1|uc008ynn.1|uc008yno.1	Mtf2	17765	25.9008	25.2035	14.4776	15.8143	5.50714	0.018939	1	0.867975
2257	uc007gni.1	D10Wsu52e	28088	121.96	106.745	146.695	134.917	5.50696	0.0189409	1	0.867975
4063	uc007llk.1|uc007lll.1|uc007llm.1	Acly	104112	131.432	126.816	152.237	161.968	5.49131	0.0191112	1	0.874298
27310	uc009uzk.1|uc009uzm.1|uc009uzn.1	Ddx3y	26900	8.89104	8.31458	2.4402	4.43109	5.4824	0.0192088	1	0.877279
11139	uc008eim.1	Polr2d	69241	82.6501	65.3846	104.937	86.0883	5.469	0.0193567	1	0.882542
1259	uc007duz.1	2310005N03Rik	N/A	17.1851	26.3944	12.4492	12.2554	5.46271	0.0194266	1	0.884235
22942	uc009jhn.1|uc009jho.1|uc009jhp.1|uc009jhq.1|uc009jhs.1	Mlstd2	N/A	16.6108	15.4779	8.10631	7.99952	5.43677	0.0197171	1	0.891573
2885	uc007ieu.1|uc007iev.1	Usp34	null	17.2117	15.4043	5.46496	11.4512	5.43677	0.0197171	1	0.891573
2156	uc007ghu.1|uc007ghv.1	Dohh	102115	29.4319	24.9422	31.4839	50.1898	5.43659	0.0197191	1	0.891573
23779	uc009lpz.1|uc009lqa.1	Slc25a4	11739	262.754	257.618	273.578	324.911	5.43654	0.0197197	1	0.891573
21666	uc009gjf.1|uc009gjg.1	Kctd15	233107	55.3548	52.6322	62.1741	82.9322	5.43052	0.0197878	1	0.893158
3274	uc007jgs.1	Tmem11	216821	29.351	30.4408	39.796	46.5159	5.40327	0.020099	1	0.905695
13060	uc008jrk.1|uc008jrl.1|uc008jrm.1	Prpf40a	56194	31.6862	29.2395	17.585	20.1137	5.39257	0.0202227	1	0.90975
24400	uc009nij.1|uc009nik.1|uc009nil.1	Dhx38	64340	44.8938	39.942	49.5602	68.0653	5.38841	0.0202709	1	0.910162
495	uc007brc.1|uc007brd.1	Cul3	26554	48.7184	49.5577	38.8204	30.2133	5.38598	0.0202991	1	0.910162
13175	uc008kca.1|uc008kcb.1|uc008kcc.1	Sp3	20687	33.3415	33.3201	23.6856	18.2533	5.37812	0.0203908	1	0.91276
6410	uc007rut.1	2810008M24Rik	75616	26.3785	25.9218	17.6788	13.276	5.37144	0.020469	1	0.914745
25218	uc009plq.2|uc009plr.2|uc009pls.2	Rdx	19684	91.6654	85.5164	68.1412	68.5216	5.35168	0.0207023	1	0.923645
11392	uc008fbb.1|uc008fbc.1|uc008fbd.1	Tcof1	21453	45.156	46.6614	61.165	64.6791	5.32446	0.0210281	1	0.936445
2066	uc007gas.1|uc007gat.1	Wdr18	216156	35.3951	34.579	41.5409	57.8474	5.32194	0.0210585	1	0.936445
21576	uc009gdg.1	DQ704011	N/A	10.4246	9.52723	5.80518	2.42241	5.31315	0.0211651	1	0.937078
26554	uc009sxi.1	Dock11	75974	9.8912	10.0181	2.77798	5.10985	5.31315	0.0211651	1	0.937078
22926	uc009jge.1|uc009jgf.1|uc009jgg.1|uc009jgh.1	Usp47	74996	29.0289	27.9759	15.529	19.4714	5.31219	0.0211767	1	0.937078
16244	uc008sde.1|uc008sdf.1|uc008sdg.1|uc008sdh.1|uc008sdi.1	AK081407	N/A	23.0136	20.83	8.99866	15.6709	5.30009	0.0213243	1	0.942067
5431	uc007pha.1|uc007phb.1|uc007phc.1	Zfp386	56220	14.1909	12.4363	5.10428	7.17755	5.28142	0.0215542	1	0.948191
19227	uc009afq.1|uc009afr.1|uc009afs.1	Zfp68	24135	13.5984	11.7431	4.48031	7.86848	5.28142	0.0215542	1	0.948191
7736	uc007vhj.1	Sub1	20024	34.7032	32.0284	24.6327	17.6063	5.27872	0.0215876	1	0.948191
10430	uc008cjk.1	Abcf1	224742	53.2476	45.6386	63.7342	69.534	5.27746	0.0216032	1	0.948191
4817	uc007nqa.1|uc007nqb.1	Pnn	18949	46.8674	41.5276	23.3746	37.6444	5.25745	0.021853	1	0.955412
8678	uc007xsw.1	9430023L20Rik	68118	34.7775	30.9034	37.0236	57.9688	5.25222	0.0219188	1	0.955412
12012	uc008grf.1|uc008grg.1	Prpf19	28000	83.6342	78.6173	106.008	100.604	5.24484	0.022012	1	0.955412
20605	uc009dve.1	Ndufa9	66108	88.646	82.4647	107.676	108.198	5.24441	0.0220173	1	0.955412
10688	uc008dar.1|uc008das.1	Chaf1a	27221	56.1662	49.8499	67.0201	74.8783	5.24432	0.0220186	1	0.955412
17344	uc008uvt.1|uc008uvu.1	Ak2	11637	70.2951	63.3712	84.9996	87.5162	5.24375	0.0220257	1	0.955412
2147	uc007ghf.1	2510012J08Rik	70312	28.0172	24.4331	31.3743	47.4626	5.23523	0.0221338	1	0.955412
15032	uc008oqh.1|uc008oqi.1|uc008oqj.1	Lrrcc1	71710	7.54385	7.19679	1.75212	3.38956	5.23248	0.0221689	1	0.955412
10280	uc008byj.1|uc008byk.1	Zfp101	22643	7.874	6.57116	2.16258	3.24112	5.23248	0.0221689	1	0.955412
16638	uc008tbw.1|uc008tbx.1	Zfp37	22696	7.59959	6.60236	2.15811	3.16774	5.23248	0.0221689	1	0.955412
17828	uc008wey.1	Aurkaip1	66077	78.5489	68.7293	93.9351	95.5156	5.23245	0.0221693	1	0.955412
23068	uc009jrw.1	Eif3c	56347	154.533	137.73	169.076	182.123	5.23069	0.0221918	1	0.955412
4314	uc007med.1	Sox9	20682	34.3499	38.5068	23.4854	24.5516	5.20268	0.0225521	1	0.968185
3228	uc007jdg.1	Guk1	14923	57.3098	49.5952	64.0382	79.2673	5.20207	0.0225601	1	0.968185
19145	uc008zzf.1|uc008zzg.1|uc008zzh.1	Ywhag	22628	78.3036	79.1112	95.9588	103.884	5.19187	0.0226928	1	0.972338
2097	uc007gdf.1|uc007gdg.1|uc007gdh.1|uc007gdi.1|uc007gdj.1|uc007gdk.1|uc007gdl.1|uc007gdm.1	Tcf3	21423	193.502	195.359	197.687	257.123	5.16641	0.0230278	1	0.985129
2155	uc007ght.1	Fzr1	56371	71.9246	70.7257	84.0627	100.444	5.15423	0.0231899	1	0.990496
26833	uc009tqi.1|uc009tqj.1|uc009tqk.1	Pls3	102866	21.9444	19.2874	12.2398	11.3029	5.13145	0.0234961	1	1
23939	uc009mcd.1	Mtap1s	270058	28.082	30.1141	29.9432	54.6586	5.12863	0.0235343	1	1
4766	uc007nmt.1|uc007nmu.1	Strn3	94186	27.3745	27.3606	16.5024	15.8044	5.11937	0.0236602	1	1
10383	uc008cfu.1|uc008cfv.1	Csnk2b	13001	102.542	117.266	147.365	122.569	5.11093	0.0237755	1	1
15110	uc008owo.1	Actl6a	56456	68.5896	68.0017	90.3791	87.0512	5.10941	0.0237964	1	1
21524	uc009fzh.1	Pak4	70584	36.5844	36.8436	48.1844	55.9597	5.08039	0.0241979	1	1
15754	uc008qrj.1	Atp1a1	11928	98.0117	96.6035	128.353	114.285	5.06471	0.0244178	1	1
6456	uc007rye.1|uc007ryf.1|uc007ryg.1	Isl1	16392	0.533043	0.158329	2.81785	4.32408	5.06203	0.0244555	1	1
7440	uc007ukw.1|uc007ukx.1	Ebf2	13592	3.60386	2.97511	0.708392	0.417417	5.06203	0.0244555	1	1
26201	uc009sax.1|uc009say.1	Acvr2b	11481	38.5128	41.3721	41.2781	69.9074	5.05374	0.0245728	1	1
5418	uc007pfy.1	Crip2	68337	14.0391	15.6059	20.3538	29.5658	5.05343	0.0245772	1	1
21054	uc009eve.1	Ndufa3	66091	122.229	91.5491	137.657	124.578	5.04243	0.0247337	1	1
6019	uc007qrw.1	Ddx46	212880	61.2991	56.9735	32.029	54.2746	5.0404	0.0247628	1	1
3572	uc007kdp.1|uc007kdq.1	Serpinf1	20317	51.3664	60.3402	67.0537	79.5564	5.03968	0.024773	1	1
22947	uc009jhx.1	Copb1	70349	50.7337	53.6279	43.7812	31.2204	5.02341	0.0250069	1	1
7421	uc007ujp.1	Esco2	71988	9.44075	9.20675	3.16308	3.63286	5.00969	0.0252058	1	1
13942	uc008lta.1|uc008ltb.1	Casc5	76464	8.98123	8.62267	2.62626	3.57412	5.00969	0.0252058	1	1
9437	uc007zwz.1|uc007zxa.1|uc007zxb.1	C21orf66	N/A	23.2235	23.1005	11.8182	15.1915	5.00261	0.0253091	1	1
17946	uc008wpd.1	Psmc2	19181	90.371	82.3197	114.632	101.142	5.00044	0.0253409	1	1
20394	uc009dfs.1|uc009dft.1	Arpc4	68089	86.4417	95.0205	131.168	94.9952	4.98562	0.0255589	1	1
11619	uc008fmd.1|uc008fme.1	Tubb6	67951	20.7385	17.0812	25.2454	35.4357	4.98112	0.0256254	1	1
11964	uc008gnt.1	1810009A15Rik	66276	20.5044	17.424	30.9054	29.1935	4.98112	0.0256254	1	1
13279	uc008kkb.1	Agtrl1	N/A	12.4207	12.4177	22.9912	19.4186	4.97183	0.0257633	1	1
24447	uc009nlo.1	Aars	234734	65.0166	61.5667	83.2667	82.1169	4.95926	0.0259513	1	1
10728	uc008ddp.1	Gtf2f1	98053	57.1438	42.8201	56.9201	77.326	4.9577	0.0259747	1	1
11820	uc008gcf.1	Rab1b	76308	98.544	101.451	112.686	134.129	4.95098	0.0260759	1	1
8315	uc007wsk.1|uc007wsl.1	Eif3eip	N/A	146.702	143.142	181.487	164.948	4.93721	0.0262844	1	1
18102	uc008xbv.1|uc008xbw.1	BC023882	N/A	11.412	10.477	4.21306	4.94234	4.93697	0.026288	1	1
9245	uc007zjy.1|uc007zjz.1|uc007zka.1	Dzip3	224170	11.1446	10.296	3.62972	5.24161	4.93697	0.026288	1	1
5884	uc007qjt.1|uc007qju.1	Nol8	70930	10.5152	9.9204	2.86427	5.82283	4.93697	0.026288	1	1
8046	uc007wbt.1	DQ712810	N/A	73.6414	32.8404	66.6717	75.2886	4.93601	0.0263027	1	1
10590	uc008csz.1	BC048355	381101	26.8322	29.4611	37.4605	44.8146	4.92795	0.0264256	1	1
20411	uc009dhm.1	Sec13	110379	91.3027	84.1468	97.03	122.001	4.92397	0.0264866	1	1
4948	uc007oao.1|uc007oap.1|uc007oaq.1	Actn1	109711	69.9701	73.4834	92.93	90.1273	4.92037	0.0265419	1	1
15214	uc008pdz.1	Narg1	N/A	43.8753	44.4314	26.1074	35.2105	4.91975	0.0265513	1	1
20104	uc009cll.1	Hk2	15277	24.6245	21.7733	32.4174	39.1446	4.91558	0.0266155	1	1
8935	uc007ymp.1	Slc25a1	13358	36.3291	40.8669	47.914	58.6816	4.91321	0.0266521	1	1
11764	uc008fye.1	Ndufv1	17995	99.7987	92.5024	111.046	128.092	4.90745	0.0267411	1	1
21272	uc009fiq.1	Ppp5c	19060	71.3134	65.2915	80.7034	93.7789	4.90357	0.0268012	1	1
11217	uc008eok.1	Ik	24010	70.307	57.8106	42.3058	52.7645	4.90139	0.0268351	1	1
26697	uc009tgv.1|uc009tgw.1|uc009tgx.1|uc009tgy.1	Htatsf1	72459	34.217	31.8686	20.0485	23.0747	4.88988	0.0270145	1	1
11823	uc008gcl.1|uc008gcm.1|uc008gcn.1	Sf3b2	319322	143.794	138.856	171.995	166.353	4.87756	0.027208	1	1
4827	uc007nrb.1	Fkbp3	30795	181.812	155.562	160.948	121.843	4.87756	0.027208	1	1
25797	uc009qun.1	Eef1a1	13627	24.8431	52.3541	28.6333	22.8509	4.87575	0.0272365	1	1
4826	uc007nqw.1|uc007nqx.1|uc007nqy.1|uc007nqz.1|uc007nra.1	Prpf39	328110	15.7866	15.3871	7.85355	7.70189	4.87201	0.0272957	1	1
21466	uc009fva.1|uc009fvb.1	Egln2	112406	55.0424	53.897	56.655	87.1191	4.85746	0.0275268	1	1
4394	uc007mkc.1|uc007mkd.1	Mrpl38	60441	46.279	37.9829	57.4743	57.6648	4.84887	0.0276643	1	1
19123	uc008zxm.1|uc008zxn.1|uc008zxo.1	Wbscr22	66138	45.7309	44.4444	58.9267	63.2262	4.8487	0.027667	1	1
8954	uc007yok.1	Cldn5	12741	11.6092	12.8159	17.0905	26.3992	4.82197	0.0280992	1	1
24529	uc009nrd.1	Gins2	272551	55.2512	54.8241	65.5005	79.3612	4.81912	0.0281457	1	1
15975	uc008rhu.1|uc008rhv.1|uc008rhw.1|uc008rhx.1	Pitx2	18741	4.79581	3.70895	1.30295	1.17964	4.81817	0.0281612	1	1
23413	uc009kqt.1	Ccnd1	12443	120.833	124.057	154.185	141.598	4.81491	0.0282145	1	1
11110	uc008egh.1	Zfp397	69256	17.3848	17.883	9.56932	9.21761	4.81266	0.0282513	1	1
2623	uc007hmj.1	Cs	12974	90.0862	80.5264	117.887	95.9299	4.81263	0.0282519	1	1
480	uc007bpz.1|uc007bqa.1	Epha4	13838	28.4322	24.3207	18.2568	13.6935	4.80795	0.0283287	1	1
26986	uc009ubh.1|uc009ubi.1|uc009ubj.1	2610529C04Rik	N/A	27.6295	23.551	17.5036	13.9812	4.80795	0.0283287	1	1
6455	uc007ryb.1|uc007ryc.1|uc007ryd.1	Pelo	105083	16.7941	15.1967	22.5737	28.8385	4.80795	0.0283287	1	1
27078	uc009uhm.1|uc009uhn.1|uc009uho.1|uc009uhp.1|uc009uhq.1	Gprasp1	67298	26.9477	24.8593	16.8029	14.7827	4.80795	0.0283287	1	1
21089	uc009eyc.1|uc009eyd.1	1500019G21Rik	N/A	44.6348	46.0794	52.6266	69.9813	4.80304	0.0284096	1	1
2636	uc007hnj.1|uc007hnk.1	Rpl41	67945	34.3507	29.2909	47.4106	42.911	4.78975	0.0286296	1	1
3553	uc007kca.1|uc007kcb.1|uc007kcc.1	1300001I01Rik	74148	29.9098	33.0693	40.429	49.8217	4.78975	0.0286296	1	1
17718	uc008vvt.1|uc008vvu.1	Apitd1	69928	20.4928	15.817	26.4572	30.8987	4.78308	0.0287407	1	1
25529	uc009qfu.1|uc009qfv.1|uc009qfw.1|uc009qfx.1|uc009qfy.1	Tln2	70549	18.7873	16.8341	27.3111	30.0607	4.78308	0.0287407	1	1
2143	uc007ggy.1	Mrpl54	66047	71.828	67.5805	85.9657	93.2839	4.77997	0.0287925	1	1
17314	uc008utq.1|uc008utr.1	Psmb2	26445	65.8209	51.8353	76.1731	78.2172	4.77872	0.0288136	1	1
14262	uc008mtt.1	Cst3	13010	79.4667	68.5603	88.3826	99.8451	4.77322	0.0289058	1	1
11827	uc008gcr.1|uc008gcs.1	Banf1	23825	133.424	157.36	182.916	162.174	4.76975	0.028964	1	1
9814	uc008ayd.1	Ndufb10	68342	98.0965	83.8939	104.989	120.728	4.75434	0.0292245	1	1
24561	uc009nsz.1|uc009nta.1	2310061F22Rik	N/A	25.4057	24.3466	29.7585	42.6924	4.75224	0.0292601	1	1
18078	uc008wzq.1|uc008wzr.1	Ppp1cb	19046	72.0025	75.4872	72.6223	39.1916	4.74423	0.0293967	1	1
17810	uc008wdp.1|uc008wdq.1|uc008wdr.1|uc008wds.1	Gnb1	14688	215.516	223.585	251.874	255.056	4.74419	0.0293973	1	1
2160	uc007gig.1	Ncln	103425	46.2586	52.5843	48.8523	83.1798	4.73045	0.0296331	1	1
10358	uc008cea.1	Zbtb12	193736	70.7071	56.3526	64.9747	99.0738	4.71723	0.0298619	1	1
23321	uc009kju.1|uc009kjv.1|uc009kjw.1	Hras1	15461	25.7955	19.0585	31.2665	36.8054	4.71429	0.029913	1	1
24522	uc009nqn.1|uc009nqo.1	Usp10	22224	52.4783	53.5728	68.2421	72.4283	4.71426	0.0299134	1	1
2114	uc007ges.1	Sf3a2	20222	58.2356	61.7231	75.0484	81.4355	4.70906	0.0300041	1	1
12834	uc008izt.1|uc008izu.1|uc008izv.1|uc008izw.1|uc008izx.1	Rapgef1	107746	39.7409	41.0922	55.0524	55.788	4.70676	0.0300442	1	1
1343	uc007eax.1|uc007eay.1|uc007eaz.1	Smyd2	226830	37.1357	33.1842	46.6526	51.0768	4.68852	0.0303649	1	1
16305	uc008shk.1	Ndufb6	230075	100.545	83.7616	119.764	109.316	4.68517	0.030424	1	1
8007	uc007vyg.1|uc007vyh.1|uc007vyi.1	Myc	17869	12.8572	12.8147	17.18	27.1385	4.68098	0.0304984	1	1
16619	uc008szv.1|uc008szw.1|uc008szx.1	Rod1	230257	20.7564	22.8635	14.6342	10.7036	4.68098	0.0304984	1	1
24030	uc009mit.1|uc009miu.1	Abce1	24015	28.2167	29.7982	17.5058	19.4585	4.68067	0.0305039	1	1
18874	uc008zdk.1|uc008zdl.1|uc008zdm.1|uc008zdn.1	Rnf10	50849	134.149	151.403	169.472	170.214	4.67893	0.0305348	1	1
12896	uc008jet.1|uc008jeu.1	2900010J23Rik	72931	90.7511	77.1878	121.791	88.3613	4.67632	0.0305813	1	1
21336	uc009fmi.1	Gemin7	69731	57.1914	49.9587	73.1962	67.817	4.676	0.0305868	1	1
27306	uc009uzd.1	Eif2s3y	26908	12.7061	11.6874	5.85618	5.79103	4.66652	0.0307562	1	1
25112	uc009pde.1|uc009pdf.1|uc009pdg.1	Hyou1	12282	77.0161	75.0722	101.989	90.0979	4.6617	0.0308426	1	1
11150	uc008ejh.1|uc008eji.1|uc008ejj.1	Bin1	30948	44.3158	43.5419	53.5455	64.6182	4.66002	0.0308728	1	1
23206	uc009kce.1	2310007H09Rik	N/A	13.3011	10.2427	18.4293	21.7528	4.64466	0.0311503	1	1
15095	uc008ovh.1	Tloc1	N/A	20.9171	19.1918	9.2106	14.2637	4.64466	0.0311503	1	1
11630	uc008fnb.1|uc008fnc.1|uc008fnd.1|uc008fne.1|uc008fnf.1	Cep192	null	17.1547	19.1296	8.87759	11.4208	4.63575	0.0313125	1	1
360	uc007bgr.1|uc007bgs.1|uc007bgt.1	Creb1	12912	18.5843	17.0233	9.88511	10.2196	4.63575	0.0313125	1	1
10432	uc008cjo.1	Gna-rs1	N/A	36.2735	34.8284	46.1184	53.1472	4.63285	0.0313655	1	1
3439	uc007jud.1|uc007jue.1|uc007juf.1|uc007jug.1|uc007juh.1	0610010K14Rik	104457	79.2903	90.625	100.876	111.052	4.62715	0.0314698	1	1
11891	uc008ghz.1	Ehd1	13660	45.6191	42.9546	55.4603	65.2623	4.6151	0.0316917	1	1
2536	uc007hfj.1|uc007hfk.1	Wif1	24117	11.0057	8.1232	5.33206	3.35198	4.6145	0.0317027	1	1
11311	uc008evm.1	Ccdc112	240261	10.1759	8.64929	4.40129	3.9949	4.6145	0.0317027	1	1
13968	uc008lur.1|uc008lus.1|uc008lut.1|uc008luu.1|uc008luv.1	Mga	29808	11.0468	10.9833	4.0365	6.37419	4.61189	0.031751	1	1
4932	uc007nzg.1|uc007nzh.1|uc007nzi.1	Mpp5	56217	10.843	11.0486	3.6808	6.17519	4.61189	0.031751	1	1
19517	uc009axg.1	C1galt1	94192	10.8572	10.6087	6.30269	4.43878	4.61189	0.031751	1	1
21469	uc009fvg.1|uc009fvh.1|uc009fvi.1	Snrpa	53607	35.7699	29.8805	34.8292	58.3634	4.6072	0.031838	1	1
10621	uc008cvq.1	Bysl	53414	21.1627	21.23	30.7716	33.2422	4.5994	0.0319832	1	1
4978	uc007odj.1|uc007odk.1|uc007odl.1|uc007odm.1|uc007odn.1	Rbm25	67039	30.9524	28.3641	18.3314	20.0342	4.58259	0.0322984	1	1
1125	uc007dlu.1|uc007dlv.1	Ddr2	18214	29.8321	28.7442	17.8877	19.8216	4.58259	0.0322984	1	1
11895	uc008gik.1|uc008gil.1|uc008gim.1|uc008gin.1	Sf1	22668	102.74	114.968	134.332	130.952	4.58074	0.0323332	1	1
1996	uc007fvy.1|uc007fvz.1	Sumo3	20610	39.2366	32.9803	47.2041	53.2297	4.57849	0.0323758	1	1
24052	uc009mkk.1	Ndufb7	66916	106.509	82.9723	95.8428	137.783	4.57427	0.0324556	1	1
14793	uc008nys.1|uc008nyt.1	Cse1l	110750	83.9631	85.1405	74.9178	57.3797	4.5597	0.0327329	1	1
11851	uc008get.1	Map3k11	26403	21.9485	24.9236	28.6904	41.1096	4.55095	0.0329005	1	1
4534	uc007muw.1|uc007mux.1|uc007muy.1	Slc16a3	80879	32.7125	33.7699	40.5114	52.931	4.54942	0.03293	1	1
1288	uc007dwv.1	Pycr2	69051	47.6015	49.0596	56.8767	71.868	4.54624	0.0329912	1	1
27150	uc009umk.1|uc009uml.1	Capn6	12338	124.672	142.367	122.859	96.9388	4.543	0.0330536	1	1
12831	uc008izl.1|uc008izm.1|uc008izn.1	Setx	269254	15.2412	14.365	5.25038	9.90141	4.53293	0.0332487	1	1
21805	uc009grv.1|uc009grw.1|uc009grx.1	Ap2a1	11771	51.7764	58.5759	61.7561	82.7862	4.52899	0.0333252	1	1
13883	uc008lor.1	Nola3	N/A	39.8657	33.3103	57.0566	44.1735	4.5254	0.0333953	1	1
24843	uc009oni.1|uc009onj.1|uc009onk.1	Prkcsh	19089	75.1295	74.3295	88.1516	100.093	4.52348	0.0334327	1	1
1322	uc007dze.1|uc007dzf.1|uc007dzg.1|uc007dzh.1	Eprs	107508	54.9188	52.8153	34.591	43.5414	4.51553	0.0335885	1	1
23038	uc009jpb.1|uc009jpc.1|uc009jpd.1|uc009jpe.1|uc009jpf.1	Tnrc6a	233833	31.753	32.9802	19.9595	23.3451	4.513	0.0336382	1	1
27185	uc009upu.1	Hsd17b10	15108	101.418	92.118	125.81	110.878	4.51022	0.033693	1	1
16708	uc008tfb.1	Pole3	59001	58.1482	39.7721	51.6724	77.5216	4.50609	0.0337744	1	1
18314	uc008xtj.1	Rasl11b	68939	26.2755	23.5726	16.8685	13.8129	4.49859	0.0339229	1	1
850	uc007cqr.1	Zc3h11a	70579	20.1906	21.197	11.5094	12.0692	4.49828	0.0339289	1	1
11902	uc008gjc.1	Prdx5	54683	58.5659	46.2048	67.0557	70.5964	4.49536	0.033987	1	1
8351	uc007wvl.1	Atf4	11911	87.6151	87.7363	116.859	101.192	4.48568	0.03418	1	1
24393	uc009nhz.1|uc009nia.1	Psmd7	17463	98.1713	86.6069	116.966	111.391	4.48512	0.0341911	1	1
9787	uc008avs.1|uc008avt.1|uc008avu.1	Rnps1	19826	19.3922	16.4468	25.8692	28.6917	4.48177	0.0342583	1	1
13959	uc008ltx.1|uc008lty.1	AK030275	N/A	18.9723	17.9276	9.63879	10.8265	4.47155	0.0344637	1	1
23906	uc009mab.1|uc009mac.1	Upf1	19704	54.4233	59.2529	64.4043	82.8125	4.45891	0.0347196	1	1
2588	uc007hju.1|uc007hjv.1	Shmt2	108037	48.7046	57.3785	65.3177	74.3531	4.45844	0.0347293	1	1
4102	uc007los.1	Aarsd1	69684	53.895	51.9134	66.3838	72.6021	4.45844	0.0347293	1	1
4359	uc007mhj.1|uc007mhk.1|uc007mhl.1	Ict1	68572	56.4459	50.2016	70.0811	68.7924	4.45844	0.0347293	1	1
15116	uc008oxa.1|uc008oxb.1|uc008oxc.1|uc008oxd.1|uc008oxe.1|uc008oxf.1|uc008oxg.1|uc008oxh.1	Ttc14	67120	7.0132	7.41705	2.34324	3.25953	4.4389	0.035129	1	1
12322	uc008hlj.1|uc008hlk.1	Zfp518	72672	7.41299	6.75907	1.76904	2.60685	4.4389	0.035129	1	1
9357	uc007zrf.1|uc007zrg.1|uc007zrh.1|uc007zri.1|uc007zrj.1|uc007zrk.1|uc007zrl.1	Robo2	268902	7.23221	7.48791	3.38927	2.14348	4.4389	0.035129	1	1
1613	uc007ewc.1|uc007ewd.1|uc007ewe.1	Rev3l	19714	6.89313	6.63235	1.47239	3.51401	4.4389	0.035129	1	1
12755	uc008itg.1	Bmyc	107771	23.485	20.8576	26.0325	39.9636	4.42981	0.0353164	1	1
11987	uc008gpf.1|uc008gpg.1|uc008gph.1	Fen1	14156	82.6665	78.4722	98.1784	103.479	4.42893	0.0353347	1	1
17351	uc008uwk.1	Yars	107271	42.5673	44.2038	59.808	56.6797	4.42781	0.0353579	1	1
19990	uc009cec.1|uc009ced.1	Smarcad1	13990	23.2488	23.4773	13.6909	13.9701	4.42261	0.0354657	1	1
1049	uc007dft.1|uc007dfu.1	AI848100	226551	12.9389	13.1419	6.13424	7.0101	4.41737	0.0355747	1	1
6232	uc007rgs.1	Ankrd32	105377	13.3451	12.6633	5.62386	6.95427	4.41737	0.0355747	1	1
175	uc007aso.1	Eif5b	226982	28.1166	23.1055	13.5595	18.2995	4.3882	0.0361884	1	1
14879	uc008ofd.1	Ctsz	64138	46.2597	41.8921	50.7438	66.6536	4.38451	0.036267	1	1
11362	uc008eyt.1|uc008eyu.1	Lmnb1	16906	135.475	125.543	146.732	163.963	4.37621	0.0364439	1	1
9661	uc008apg.1|uc008aph.1	Lix1	66643	55.518	55.264	47.9095	33.7534	4.37406	0.03649	1	1
12719	uc008irb.1|uc008irc.1	Ssna1	68475	64.5626	57.8112	73.001	84.8945	4.37077	0.0365604	1	1
2078	uc007gca.1|uc007gcb.1|uc007gcc.1|uc007gcd.1	Midn	59090	129.977	142.769	151.32	173.181	4.3621	0.036747	1	1
24704	uc009oea.1|uc009oeb.1|uc009oec.1|uc009oed.1|uc009oee.1	Cep57	74360	21.4709	21.1292	12.1266	12.6207	4.36095	0.0367718	1	1
3511	uc007kab.1	Tmem93	66048	33.8162	30.8136	43.9035	46.8478	4.35362	0.0369303	1	1
19286	uc009ajy.1	E130309D02Rik	231868	42.2988	46.7766	54.6208	64.0533	4.34205	0.0371821	1	1
2046	uc007fzi.1	Cdc34	216150	34.2816	37.347	38.8674	59.4029	4.33215	0.037399	1	1
11160	uc008ekd.1|uc008eke.1|uc008ekf.1	Apc	11789	15.1797	15.0347	6.1278	9.68096	4.32921	0.0374635	1	1
17979	uc008wsb.1	Abcf2	27407	41.3446	41.6021	55.9692	55.6214	4.32886	0.0374713	1	1
21539	uc009gah.1	Actn4	60595	102.818	99.092	112.278	133.789	4.3284	0.0374814	1	1
18566	uc008ymm.1	Glmn	170823	10.5491	11.8971	6.41733	5.39396	4.32792	0.037492	1	1
19901	uc009bys.1	Hoxa13	15398	14.2803	8.92733	5.88537	4.80697	4.32792	0.037492	1	1
2479	uc007hbg.1|uc007hbh.1	Ccdc131	N/A	10.7166	11.7432	4.13522	6.92192	4.32792	0.037492	1	1
16772	uc008tkw.1|uc008tkx.1|uc008tla.1	Psip1	101739	41.0673	38.2325	25.0137	30.4985	4.32179	0.0376273	1	1
14202	uc008mpw.1	Flrt3	71436	20.374	18.3308	11.8805	10.4936	4.31873	0.037695	1	1
675	uc007cee.1	Bok	51800	11.086	10.5042	15.1232	23.1491	4.31873	0.037695	1	1
13045	uc008jqf.1|uc008jqg.1	Rnd3	74194	23.5364	22.6918	15.0493	14.2071	4.30394	0.0380243	1	1
5380	uc007pdo.1|uc007pdp.1|uc007pdq.1	6720458F09Rik	N/A	13.5292	15.2413	16.9782	29.6683	4.30394	0.0380243	1	1
19225	uc009afo.1	Zfp157	72154	8.77714	7.77896	3.12313	4.34726	4.29648	0.0381914	1	1
21246	uc009fha.1|uc009fhb.1|uc009fhc.1|uc009fhd.1|uc009fhe.1	Mrg2	N/A	3.69034	2.8251	5.68393	11.0072	4.29648	0.0381914	1	1
26997	uc009ubx.1	Gpr23	N/A	9.13085	7.67945	3.71836	3.4929	4.29648	0.0381914	1	1
18188	uc008xix.1	Qdpr	110391	50.8155	45.9799	65.3452	62.9738	4.28473	0.0384562	1	1
20119	uc009cmn.1	Gcs1	N/A	35.7504	35.7462	44.8799	53.5449	4.28105	0.0385395	1	1
24556	uc009nss.1|uc009nst.1	Mvd	192156	34.5492	36.5191	43.8283	55.4187	4.28105	0.0385395	1	1
26650	uc009tdt.1|uc009tdu.1|uc009tdv.1	Mbnl3	171170	10.1591	10.327	4.44192	4.94926	4.27871	0.0385926	1	1
7890	uc007vtd.1|uc007vte.1	Zhx1	22770	9.88827	10.152	4.11057	5.33208	4.27871	0.0385926	1	1
24728	uc009oft.1|uc009ofu.1|uc009ofv.1|uc009ofw.1|uc009ofx.1|uc009ofy.1	5830418K08Rik	319675	10.022	10.4783	3.34303	5.82256	4.27871	0.0385926	1	1
21491	uc009fwz.1|uc009fxa.1	Zfp60	22718	9.48853	10.5555	4.81267	4.4118	4.27871	0.0385926	1	1
1854	uc007flr.1|uc007fls.1|uc007flt.1|uc007flu.1|uc007flv.1	Jmjd1c	108829	9.64294	9.88764	3.04514	6.1959	4.27871	0.0385926	1	1
4506	uc007mtf.1|uc007mtg.1	BC003940	N/A	71.8541	69.9008	82.2523	97.0409	4.27429	0.0386931	1	1
16048	uc008rnk.1	Adh5	11532	110.737	103.839	147.729	112.482	4.26956	0.038801	1	1
10624	uc008cvx.1|uc008cvy.1	1110002E23Rik	N/A	81.6764	76.6209	108.257	89.8319	4.26902	0.0388133	1	1
16497	uc008srh.1|uc008sri.1|uc008srj.1|uc008srk.1|uc008srl.1	Clta	12757	97.0686	79.9881	110.539	106.647	4.26337	0.0389426	1	1
11829	uc008gcu.1	Sart1	20227	30.3181	26.3097	35.2332	44.8639	4.25756	0.0390761	1	1
20333	uc009dal.1|uc009dam.1|uc009dan.1|uc009dao.1|uc009dap.1|uc009daq.1	Ube1c	N/A	22.7717	19.8155	14.344	12.3507	4.23184	0.0396723	1	1
24707	uc009oej.1	Sesn3	75747	22.0398	21.471	12.3772	13.6452	4.23184	0.0396723	1	1
12768	uc008iuf.1	AK007459	N/A	12.9452	13.0192	15.9475	26.8132	4.23184	0.0396723	1	1
24229	uc009mvw.1|uc009mvx.1	Mt1	17748	51.4597	22.3606	46.1433	53.9803	4.23115	0.0396886	1	1
17390	uc008uzg.1|uc008uzh.1|uc008uzi.1|uc008uzj.1	2610200G18Rik	N/A	60.1051	60.2372	83.043	71.3705	4.22987	0.0397184	1	1
17018	uc008tza.1	Mrpl37	56280	57.3912	63.338	78.4367	75.5203	4.22987	0.0397184	1	1
15374	uc008ppl.1	Sfrp2	20319	29.6794	32.0182	38.4837	49.0955	4.21454	0.040079	1	1
4668	uc007ner.1	Rrm2	20135	105.006	94.3223	121.926	119.869	4.19941	0.040438	1	1
2136	uc007ggg.1|uc007ggh.1|uc007ggi.1|uc007ggj.1|uc007ggk.1	Dapk3	13144	24.8949	22.281	26.4298	43.2488	4.19779	0.0404766	1	1
21250	uc009fhm.1|uc009fhn.1	Ccdc9	243846	22.1961	15.763	23.6	34.3218	4.19734	0.0404874	1	1
14148	uc008mkx.1	Cenpb	12616	64.4114	65.3436	71.2494	93.3281	4.19089	0.0406418	1	1
8979	uc007ypu.1	Eif2b5	224045	68.2241	69.0126	91.4149	81.7066	4.19009	0.0406609	1	1
1358	uc007ecg.1	Nenf	66208	27.5487	24.3989	29.0793	45.9442	4.18843	0.0407008	1	1
10279	uc008byi.1	Zfp81	224694	5.82651	5.75612	2.31573	2.38837	4.18599	0.0407595	1	1
1527	uc007ept.1|uc007epu.1	Eya4	14051	6.15157	5.98069	1.95107	1.83237	4.18599	0.0407595	1	1
467	uc007box.1	Des	13346	1.69887	2.20731	4.39991	7.55672	4.18599	0.0407595	1	1
17318	uc008uty.1	Zmym4	null	26.4028	27.035	16.8929	17.435	4.18306	0.04083	1	1
17975	uc008wru.1|uc008wrv.1|uc008wrw.1	Centg3	N/A	38.4974	36.2361	41.0358	59.5774	4.1824	0.0408458	1	1
11656	uc008fpg.1	Cxxc1	74322	48.1105	45.0516	53.2388	70.2062	4.18017	0.0408997	1	1
7809	uc007vmx.1|uc007vmy.1	Pabpc1	18458	46.7378	46.2005	53.021	70.3577	4.18017	0.0408997	1	1
12863	uc008jcn.1	Ppp2r4	110854	86.691	93.5312	114.679	107.251	4.17844	0.0409413	1	1
25932	uc009rey.1|uc009rez.1|uc009rfa.1|uc009rfb.1	Stag1	20842	20.3566	19.3663	11.129	11.5425	4.17613	0.0409972	1	1
21252	uc009fhp.1|uc009fhq.1|uc009fhr.1	Sae1	56459	122.407	108.985	154.341	122.96	4.17107	0.0411199	1	1
7343	uc007udx.1|uc007udy.1	Fgf9	14180	2.10567	1.49748	0.448188	0.235447	4.15888	0.0414167	1	1
21894	uc009gym.1	Myod1	17927	2.49082	1.44737	0.08546	0.048818	4.15888	0.0414167	1	1
14244	uc008msv.1	AB080658	N/A	1.79515	1.25434	0.186532	0.477326	4.15888	0.0414167	1	1
2053	uc007fzs.1|uc007fzt.1	Fstl3	83554	0.468085	0.442497	0.738641	2.05475	4.15888	0.0414167	1	1
18310	uc008xtc.1|uc008xtd.1|uc008xte.1	Spata18	73472	1.42255	1.5439	0.428557	0.25471	4.15888	0.0414167	1	1
24038	uc009mje.1|uc009mjf.1|uc009mjg.1|uc009mjh.1|uc009mji.1	Inpp4b	234515	1.18108	1.60276	0.411417	0.438502	4.15888	0.0414167	1	1
45	uc007aja.1	Msc	17681	1.83495	1.43362	0.180991	0.152129	4.15888	0.0414167	1	1
15355	uc008pnz.1|uc008poa.1|uc008pob.1|uc008poc.1|uc008pod.1|uc008poe.1|uc008pof.1	Gria2	14800	2.04688	1.46517	0.053216	0.032997	4.15888	0.0414167	1	1
20502	uc009doq.1	A2m	232345	0.3152	0.339885	1.3803	1.52551	4.15888	0.0414167	1	1
16943	uc008ttn.1|uc008tto.1|uc008ttp.1	E130114P18Rik	null	0.435022	0.375238	1.56962	1.05638	4.15888	0.0414167	1	1
14959	uc008okf.1|uc008okg.1|uc008okh.1	C030019F02Rik	N/A	1.15999	1.50941	0.255393	0.439433	4.15888	0.0414167	1	1
5352	uc007pbi.1	Dio3	107585	0.452589	0.385275	0.527343	1.95796	4.15888	0.0414167	1	1
6153	uc007rbf.1|uc007rbg.1	AA987161	null	0.965984	1.50301	0.375244	0.449139	4.15888	0.0414167	1	1
9028	uc007ytr.1|uc007yts.1|uc007ytt.1|uc007ytu.1	Masp1	17174	0.266945	0.240748	0.971694	1.62217	4.15888	0.0414167	1	1
12802	uc008ixc.1	C630035N08Rik	N/A	1.52092	0.929846	0.197044	0.397104	4.15888	0.0414167	1	1
8740	uc007xwx.1	AK035706	N/A	0.19494	0.052515	1.66976	0.942459	4.15888	0.0414167	1	1
13811	uc008lko.1|uc008lkp.1	Wt1	22431	0.290347	0.123066	0.77666	1.57055	4.15888	0.0414167	1	1
2108	uc007gee.1|uc007gef.1|uc007geg.1	Mknk2	17347	74.4052	81.42	86.562	106.065	4.15771	0.0414454	1	1
10531	uc008con.1	Cenpq	83815	14.9217	16.1857	8.94584	8.45199	4.14329	0.0417998	1	1
3091	uc007itv.2	Col23a1	237759	18.3784	17.3722	11.2993	9.45307	4.14319	0.0418022	1	1
16707	uc008tez.1|uc008tfa.1	Alad	17025	41.6147	39.0936	47.8738	61.0078	4.14138	0.041847	1	1
9797	uc008awq.1|uc008awr.1|uc008aws.1	Traf7	224619	53.5229	54.4177	63.6325	76.3864	4.14057	0.0418671	1	1
8378	uc007wxo.1	Phf5a	68479	52.9458	47.8742	64.3216	68.4729	4.13672	0.0419624	1	1
16608	uc008sza.1|uc008szb.1|uc008szc.1	Edg2	N/A	67.0191	65.1703	57.1048	44.0653	4.13672	0.0419624	1	1
23915	uc009mao.1|uc009map.1|uc009maq.1|uc009mar.1|uc009mas.1|uc009mat.1	Fkbp8	14232	71.6891	67.0619	76.1087	99.479	4.13648	0.0419684	1	1
13516	uc008kuc.1	Cugbp1	N/A	78.1881	70.4958	98.5096	86.2303	4.11961	0.0423888	1	1
6014	uc007qro.1	Ddx41	72935	46.9756	41.2465	51.5639	64.7329	4.11623	0.0424736	1	1
9653	uc008aot.1|uc008aou.1|uc008aov.1	Chd1	12648	29.2176	29.883	18.2312	20.9201	4.11045	0.0426191	1	1
1670	uc007faa.1|uc007fab.1|uc007fac.1	Lin28b	380669	12.6491	14.174	21.8846	21.6522	4.11024	0.0426244	1	1
14529	uc008nex.1	Tcf15	21407	14.8275	11.9773	13.8489	29.7666	4.11024	0.0426244	1	1
17761	uc008vzx.1|uc008vzy.1|uc008vzz.1|uc008waa.1	Acot7	70025	13.5509	13.2088	17.7636	25.6126	4.11024	0.0426244	1	1
2069	uc007gaz.1	Cnn2	12798	72.6736	67.4792	88.2441	87.5938	4.11018	0.0426257	1	1
7233	uc007tvy.1|uc007tvz.1|uc007twa.1|uc007twb.1	Mrpl52	68836	67.3402	64.7741	76.5328	89.6975	4.1064	0.0427213	1	1
1108	uc007dku.1	Uck2	80914	106.131	119.222	132.228	137.877	4.09656	0.0429705	1	1
22404	uc009hzm.1|uc009hzn.1	Idh2	269951	192.911	175.758	202.004	223.533	4.0903	0.04313	1	1
14105	uc008mho.1|uc008mhp.1	Ckap2l	70466	27.5572	26.4298	17.8577	16.871	4.08757	0.0431998	1	1
19106	uc008zvt.1|uc008zvu.1|uc008zvv.1|uc008zvw.1|uc008zvx.1|uc008zvy.1|uc008zvz.1|uc008zwa.1|uc008zwb.1|uc008zwc.1|uc008zwd.1|uc008zwe.1|uc008zwf.1|uc008zwg.1|uc008zwh.1	Gtf2ird1	57080	14.6201	16.2552	24.6357	24.3164	4.08488	0.0432684	1	1
22517	uc009iib.1|uc009iic.1|uc009iid.1|uc009iie.1	Pcf11	74737	11.7839	12.25	5.27667	7.26487	4.07758	0.0434559	1	1
3678	uc007klf.1|uc007klg.1|uc007klh.1	Atad5	237877	11.9512	12.4565	5.14704	6.79758	4.07758	0.0434559	1	1
25059	uc009ozt.1|uc009ozu.1|uc009ozw.1	9030425E11Rik	71566	40.3956	42.7767	28.3658	30.9904	4.07587	0.0434998	1	1
5243	uc007osq.1	Calm1	12313	133.882	124.639	135.891	171.264	4.07556	0.0435077	1	1
23082	uc009jss.1	Ppp4c	56420	152.109	155.286	183.637	175.153	4.0642	0.0438016	1	1
10236	uc008bvb.1|uc008bvc.1|uc008bvd.1	Wdr4	57773	26.73	26.7386	33.7178	42.5783	4.05917	0.043932	1	1
1044	uc007dfl.1|uc007dfm.1	Prdx6	11758	69.4735	73.0846	105.171	72.7534	4.05859	0.0439473	1	1
4152	uc007lsp.1|uc007lsq.1|uc007lsr.1|uc007lss.1	Eftud2	20624	71.1913	70.5539	89.9768	88.2803	4.05859	0.0439473	1	1
18244	uc008xni.1|uc008xnj.1|uc008xnk.1|uc008xnl.1|uc008xnm.1	Rfc1	19687	34.9164	35.7537	20.6224	28.2232	4.05624	0.0440085	1	1
26791	uc009tnl.1|uc009tnm.1	Hcfc1	15161	86.9482	90.8491	105.717	112.358	4.0473	0.044242	1	1
9762	uc008atr.1|uc008ats.1	Tceb2	67673	14.4407	9.65144	17.1415	23.2602	4.04274	0.0443616	1	1
20581	uc009dtn.1	Nol1	N/A	37.5867	38.5434	50.0999	54.2287	4.0427	0.0443629	1	1
4257	uc007lzp.1|uc007lzq.1|uc007lzr.1|uc007lzs.1	Ddx5	13207	50.9805	52.5687	44.7768	31.7901	4.0427	0.0443629	1	1
23798	uc009lrn.1|uc009lro.1|uc009lrp.1|uc009lrq.1	Dctd	320685	33.3731	37.9474	49.7234	46.7357	4.04003	0.0444331	1	1
10709	uc008dck.1	AK087504	N/A	56.3458	48.1143	57.0777	77.7469	4.03227	0.0446378	1	1
3120	uc007ivy.1|uc007ivz.1	Uqcrq	22272	29.769	30.3801	29.7797	53.7843	4.01873	0.0449977	1	1
6251	uc007rid.1	Cetn3	12626	42.5902	40.8944	36.825	23.1126	4.01873	0.0449977	1	1
8598	uc007xne.1|uc007xnf.1|uc007xng.1	Ddx23	74351	56.2486	48.6707	63.4958	73.2134	3.99862	0.0455375	1	1
20162	uc009cpq.1	Smyd5	232187	37.5476	40.1473	51.0357	54.1158	3.99819	0.0455492	1	1
17300	uc008usn.1|uc008uso.1|uc008usp.1	2610027C15Rik	N/A	32.5851	32.7105	32.0286	58.992	3.99789	0.0455573	1	1
5982	uc007qok.1	D13Wsu177e	N/A	28.9614	26.2982	38.6057	38.6806	3.99751	0.0455676	1	1
10915	uc008dpk.1|uc008dpl.1	Cebpz	12607	28.4453	27.2365	16.0075	19.6468	3.99637	0.0455984	1	1
24018	uc009mhv.1|uc009mhw.1	Ednra	13617	24.4565	20.8411	17.0955	10.798	3.99549	0.0456223	1	1
27090	uc009uig.1	Bex1	19716	16.014	11.9441	23.2902	21.5387	3.99549	0.0456223	1	1
12484	uc008hxb.1|uc008hxc.1|uc008hxd.1	Pdcd4	18569	25.2372	20.1312	14.6903	12.6513	3.99549	0.0456223	1	1
26117	uc009rug.1|uc009ruh.1|uc009rui.1|uc009ruj.1	Setd2	235626	17.6248	17.5996	8.90047	12.3575	3.99424	0.045656	1	1
17	uc007agk.1	Rrs1	59014	11.2194	9.86266	14.1032	21.7499	3.99424	0.045656	1	1
26185	uc009rzr.1|uc009rzs.1|uc009rzt.1|uc009rzu.1|uc009rzv.1	Golga4	54214	19.4447	17.3862	6.01387	15.0159	3.99424	0.045656	1	1
2192	uc007gkj.1	A230046K03Rik	319277	11.1971	10.4308	3.93804	5.96978	3.98956	0.0457829	1	1
12070	uc008guf.1	4632417K18Rik	N/A	10.2203	11.4815	3.85093	5.86362	3.98956	0.0457829	1	1
12218	uc008heb.1	Ranbp6	240614	10.3324	10.6155	4.16202	5.67769	3.98956	0.0457829	1	1
3267	uc007jge.1|uc007jgf.1|uc007jgg.1	Llgl1	16897	88.6758	92.288	96.6819	123.613	3.98669	0.045861	1	1
25441	uc009pys.1|uc009pyt.1	Myo9a	270163	6.80599	7.84898	1.86503	3.64109	3.98486	0.0459109	1	1
23974	uc009mez.1	Zfp617	170938	10.4783	4.53177	2.98374	3.02644	3.98486	0.0459109	1	1
27021	uc009udk.1|uc009udl.1	Zfp711	245595	4.72087	4.68532	1.35494	2.1843	3.97652	0.0461388	1	1
3934	uc007ldu.1	Kpnb1	16211	184.205	183.492	232.947	190.443	3.97295	0.0462367	1	1
18494	uc008yha.1|uc008yhb.1	Enoph1	67870	31.3006	30.3716	38.9579	46.095	3.96317	0.0465061	1	1
19553	uc009bag.1	Wnt2	22413	0.60358	0.051921	2.27264	4.34623	3.96243	0.0465264	1	1
3849	uc007kyg.1	Wfikkn2	278507	3.15094	2.67968	0.723544	0.113285	3.96243	0.0465264	1	1
19903	uc009byu.1	AK031498	N/A	3.56405	2.44354	1.47251	0.459637	3.96243	0.0465264	1	1
20937	uc009emf.1|uc009emg.1	Wbp11	60321	45.8859	45.6941	60.32	60.6519	3.96065	0.0465758	1	1
542	uc007bvl.1	Ncl	17975	113.205	98.8959	68.468	105.295	3.95743	0.0466648	1	1
1754	uc007fgm.1	H2afy2	404634	45.1886	33.9662	49.9577	55.9606	3.95465	0.046742	1	1
295	uc007bbk.1	Sgol2	68549	10.2493	8.48358	3.1592	5.04145	3.94708	0.0469527	1	1
24498	uc009npc.1	Plcg2	234779	4.0927	4.06611	8.24139	9.60062	3.94708	0.0469527	1	1
16761	uc008tjl.1|uc008tjm.1|uc008tjn.1|uc008tjo.1|uc008tjp.1	Ptprd	19266	9.56179	8.17936	4.1896	3.87953	3.94708	0.0469527	1	1
11920	uc008gki.1	Otub1	107260	102.966	99.9726	122.294	122.678	3.94329	0.0470587	1	1
16955	uc008tuo.1|uc008tup.1|uc008tuq.1	Dock7	67299	39.3144	40.1009	29.5092	26.1466	3.9377	0.0472153	1	1
20303	uc009cye.1	Lsm3	67678	108.719	104.858	152.447	105.47	3.93116	0.0473992	1	1
15436	uc008pul.1|uc008pum.1|uc008pun.1|uc008puo.1	Cct3	12462	98.1228	95.86	118.695	116.022	3.9244	0.0475901	1	1
17368	uc008uxm.1|uc008uxn.1	Eif3i	54709	41.4318	39.4856	52.1459	55.1608	3.91205	0.0479409	1	1
2459	uc007gzs.1	Csrp2	13008	85.4807	80.7995	110.298	94.0288	3.90959	0.0480112	1	1
19181	uc009aco.1	Pop7	74097	20.3499	16.9693	26.342	29.6431	3.90918	0.0480229	1	1
15357	uc008poi.1|uc008poj.1|uc008pok.1	Pdgfc	54635	29.2019	26.7055	22.2635	15.0851	3.90918	0.0480229	1	1
2728	uc007hso.1	AK177174	N/A	17.0026	19.5173	33.4632	23.2358	3.90918	0.0480229	1	1
4408	uc007mld.1|uc007mle.1	Prpsap1	67763	52.3369	55.9879	66.7284	72.0591	3.90097	0.0482583	1	1
21636	uc009ghg.1|uc009ghh.1	Usf2	22282	33.6362	33.9163	39.8294	52.7096	3.89774	0.0483511	1	1
25194	uc009pjv.1	Sdhd	66925	103.972	102.265	130.613	116.992	3.89102	0.0485448	1	1
8490	uc007xeq.1	Pim3	223775	14.9245	14.2233	19.1137	27.0477	3.88703	0.0486605	1	1
6258	uc007riw.1|uc007rix.1	Rasa1	218397	22.9775	22.7433	13.1763	16.29	3.88703	0.0486605	1	1
4093	uc007lny.1|uc007lnz.1	Ramp2	54409	15.2986	13.6982	24.0418	21.5825	3.88703	0.0486605	1	1
8854	uc007yfd.1	BC067207	N/A	21.7497	23.9231	16.7355	11.5069	3.88703	0.0486605	1	1
27159	uc009una.1|uc009unb.1	Amot	27494	52.4009	55.6185	48.7428	31.6178	3.87037	0.0491457	1	1
4601	uc007mzu.1|uc007mzv.1|uc007mzw.1|uc007mzx.1|uc007mzy.1|uc007mzz.1|uc007naa.1	Pum2	80913	52.9968	54.6174	37.8659	42.7424	3.87037	0.0491457	1	1
9099	uc007yyz.1|uc007yza.1|uc007yzb.1	Tfrc	22042	30.7557	30.9536	21.4319	20.5093	3.87022	0.0491501	1	1
10374	uc008cfh.1|uc008cfi.1	Ddah2	51793	194.499	169.574	189.073	229.797	3.86653	0.0492583	1	1
14931	uc008ohy.1|uc008ohz.1|uc008oia.1	Lsm14b	241846	68.9394	64.3528	82.5591	84.2761	3.86162	0.0494025	1	1
11218	uc008eol.1	Wdr55	67936	27.4639	25.019	34.5478	38.8629	3.86103	0.04942	1	1
18084	uc008xag.1	Ywhah	22629	11.8339	9.66403	10.2661	27.2015	3.85574	0.049576	1	1
8239	uc007wof.1|uc007wog.1|uc007woh.1	Txn2	56551	45.2649	42.8523	53.6932	62.329	3.8553	0.0495892	1	1
17232	uc008uoa.1|uc008uob.1|uc008uoc.1	Rlf	109263	12.8683	12.1073	5.17962	7.62015	3.85511	0.0495946	1	1
7857	uc007vqw.1|uc007vqx.1|uc007vqy.1|uc007vqz.1|uc007vra.1	Trps1	83925	11.8222	12.8486	5.47941	7.54863	3.85511	0.0495946	1	1
18984	uc008zll.1|uc008zlm.1|uc008zln.1	Ift81	12589	11.6769	12.846	5.49109	7.51756	3.85511	0.0495946	1	1
9874	uc008bcm.1	BC048715	N/A	1.16408	1.4411	2.83012	5.20806	3.8549	0.049601	1	1
4888	uc007nvz.1	AK035085	N/A	3.67302	3.89297	1.44361	0.90694	3.8549	0.049601	1	1
592	uc007bzj.1|uc007bzk.1|uc007bzl.1	Col6a3	12835	3.75764	3.82244	0.918619	0.609623	3.8549	0.049601	1	1
12883	uc008jdy.1	Exosc2	227715	51.9651	42.5332	63.5069	59.5744	3.85149	0.049702	1	1
8358	uc007wvz.1	Adsl	11564	57.1631	52.6687	65.9022	75.3648	3.83848	0.0500889	1	1
23135	uc009jwo.1|uc009jwp.1|uc009jwq.1	Fbxl19	233902	63.5686	61.7299	68.857	89.747	3.82964	0.0503538	1	1
6381	uc007rsh.1|uc007rsi.1|uc007rsj.1	Sfrs12	218543	29.0547	28.2002	15.438	22.7239	3.82575	0.0504708	1	1
26938	uc009txv.1|uc009txw.1|uc009txx.1|uc009txy.1	Taf1	270627	17.1297	16.0263	7.76203	11.4232	3.81614	0.050761	1	1
3066	uc007iry.1	Mgat4b	103534	28.7095	34.795	42.2874	46.0648	3.80538	0.0510882	1	1
11810	uc008gbt.1	Mrpl11	66419	59.711	59.2546	83.8946	66.5631	3.80152	0.051206	1	1
26970	uc009tzz.1|uc009uaa.1	Rnf12	N/A	20.7859	21.4445	12.836	12.8902	3.80024	0.0512453	1	1
12341	uc008hmk.1	Rrp12	107094	24.2291	24.0989	31.1428	38.3808	3.78973	0.0515678	1	1
14814	uc008oaj.1|uc008oak.1	Ptpn1	19246	23.2789	24.6465	30.6274	38.2022	3.78973	0.0515678	1	1
16196	uc008rzg.1|uc008rzh.1	Ints8	72656	33.6682	34.5206	27.4312	20.7607	3.78973	0.0515678	1	1
15105	uc008owd.1	Pik3ca	18706	23.8431	22.7567	14.9672	15.4888	3.78435	0.0517341	1	1
12222	uc008hej.1|uc008hek.1	Gldc	104174	13.9706	15.514	23.5931	22.8327	3.78435	0.0517341	1	1
22377	uc009hxp.1|uc009hxq.1|uc009hxr.1|uc009hxs.1	Isg20l1	N/A	16.0425	14.4318	18.0574	28.964	3.78435	0.0517341	1	1
11828	uc008gct.1	2010003J03Rik	N/A	50.7538	45.9626	60.8156	65.098	3.782	0.0518066	1	1
23383	uc009kov.1|uc009kow.1|uc009kox.1	Tssc4	56844	46.792	42.9805	50.5604	67.315	3.7807	0.051847	1	1
23097	uc009jtx.1	2900092E17Rik	67278	40.3982	36.8679	47.5692	54.5286	3.76873	0.0522194	1	1
23481	uc009kvb.1	Col4a1	12826	89.0133	93.5229	113.116	109.062	3.76138	0.0524492	1	1
19823	uc009bsz.1|uc009bta.1	Cul1	26965	66.6491	67.7142	53.1737	51.5304	3.75983	0.052498	1	1
25801	uc009quv.1	Cox7a2	12866	84.3461	70.7233	106.493	85.1866	3.75245	0.0527301	1	1
10190	uc008brl.1|uc008brm.1|uc008brn.1	Mapk14	26416	42.2145	42.1828	52.9235	57.7281	3.7505	0.0527917	1	1
8166	uc007whs.1|uc007wht.1	Tsta3	22122	43.7691	39.72	49.6909	60.743	3.7505	0.0527917	1	1
15480	uc008pym.1	Dpm3	68563	44.6089	39.3975	39.5544	70.9844	3.7505	0.0527917	1	1
2786	uc007hxb.1|uc007hxc.1|uc007hxd.1	Dbnl	13169	49.4118	42.4118	57.8194	61.4932	3.74447	0.0529824	1	1
7294	uc007uax.1	Nfatc4	73181	65.5161	69.8952	53.9599	52.0375	3.72859	0.0534884	1	1
17124	uc008ugm.1	Pik3r3	18710	19.7424	17.8165	13.5652	9.4328	3.72663	0.0535514	1	1
8789	uc007yae.1|uc007yaf.1	Nmral1	67824	134.657	114.864	143.812	151.212	3.71983	0.0537699	1	1
17605	uc008vol.1	Zbtb17	22642	31.4856	28.8379	33.6551	48.7881	3.71542	0.0539121	1	1
21528	uc009fzo.1	Mrps12	24030	50.5687	47.6404	54.1996	73.761	3.71499	0.053926	1	1
23110	uc009juv.1	Zfp771	244216	37.0617	35.3385	33.1306	63.8132	3.71183	0.054028	1	1
20196	uc009crp.1|uc009crq.1|uc009crr.1|uc009crs.1|uc009crt.1	Tia1	21841	26.8309	26.2257	18.3193	16.5694	3.70793	0.0541545	1	1
10181	uc008bqz.1|uc008bra.1	Fkbp5	14229	32.5717	32.6218	46.3359	44.0623	3.70701	0.0541843	1	1
13926	uc008lsa.1	Srp14	20813	74.7667	56.3769	93.0524	71.3233	3.69926	0.0544365	1	1
2911	uc007igv.1|uc007igw.1|uc007igx.1|uc007igy.1	Ccdc88a	108686	6.64023	6.48726	2.04921	2.9365	3.68298	0.0549706	1	1
20141	uc009cob.1	Vax2	24113	2.73133	2.40348	6.40519	7.19147	3.68298	0.0549706	1	1
20563	uc009dsa.1|uc009dsb.1	Usp5	22225	83.8411	83.9327	100.415	105.136	3.67628	0.0551917	1	1
11288	uc008euf.1	BC134356	N/A	9.92449	9.70407	18.4315	16.237	3.67143	0.0553528	1	1
13086	uc008jtx.1|uc008jty.1|uc008jtz.1|uc008jua.1	40609	57438	17.8902	15.5652	9.01764	10.6107	3.67143	0.0553528	1	1
10340	uc008ccv.1	Pbx2	18515	87.3791	90.6738	117.378	99.2028	3.67068	0.0553777	1	1
2163	uc007gik.1|uc007gil.1	Gna11	14672	36.179	36.716	44.3129	54.0021	3.6681	0.0554633	1	1
18628	uc008yrd.1	Noc4l	100608	35.84	37.0816	45.6573	51.506	3.6681	0.0554633	1	1
11917	uc008gke.1|uc008gkf.1	Stip1	20867	122.786	120.194	160.383	127.314	3.65704	0.0558328	1	1
11962	uc008gnr.1	AI462493	107197	27.3798	18.4374	26.3446	39.1933	3.65667	0.0558452	1	1
23657	uc009lhj.1	Hook3	320191	14.8338	10.7984	6.2689	7.80125	3.65604	0.0558662	1	1
17038	uc008uaj.1	Magoh	17149	140.842	125.676	177.868	135.043	3.65211	0.0559982	1	1
26876	uc009tss.1|uc009tst.1|uc009tsu.1	Pola1	18968	10.3302	9.07884	3.40243	6.44111	3.65151	0.0560183	1	1
18871	uc008zdf.1	2410014A08Rik	N/A	116.898	103.544	138.392	125.212	3.64922	0.0560956	1	1
25987	uc009rjn.1|uc009rjo.1	Rpl29	19944	7.93036	8.59805	12.1761	18.4608	3.64306	0.0563035	1	1
122	uc007aor.1	Imp4	27993	45.8828	41.1637	55.4638	58.651	3.63785	0.0564797	1	1
20570	uc009dsm.1	Ptms	69202	164.148	177.623	139.479	155.132	3.62609	0.0568804	1	1
12962	uc008jlb.1	Ndufa8	68375	74.9314	59.2034	84.399	83.2289	3.62522	0.0569099	1	1
14516	uc008ndx.1|uc008ndy.1|uc008ndz.1|uc008nea.1|uc008neb.1	Fkbp1a	14225	17.8256	18.0163	22.9854	31.4439	3.62439	0.0569384	1	1
7463	uc007ump.1|uc007umq.1|uc007umr.1	R3hcc1	71843	32.6638	28.6113	40.3287	45.218	3.61347	0.0573135	1	1
20518	uc009dpq.1	Slc2a3	20527	48.1233	37.1832	34.9964	26.8922	3.61347	0.0573135	1	1
25400	uc009pvj.1|uc009pvk.1|uc009pvl.1	Csk	12988	54.4789	56.3829	64.3866	76.2367	3.60869	0.0574784	1	1
13961	uc008lua.1|uc008lub.1	Nusap1	108907	20.9377	18.025	13.1108	11.0849	3.60596	0.0575728	1	1
2045	uc007fzh.1	Gtrgeo22	N/A	25.6245	25.4798	25.553	45.8931	3.60299	0.0576757	1	1
617	uc007cbh.1	Ndufa10	67273	88.3081	84.3039	112.198	96.7215	3.59885	0.0578197	1	1
14630	uc008nlx.1|uc008nly.1	Ergic3	66366	74.3893	69.7514	83.7771	94.1088	3.59676	0.0578922	1	1
13275	uc008kjt.1|uc008kju.1|uc008kjv.1	Ssrp1	20833	216.082	208.62	254.569	227.228	3.5845	0.0583209	1	1
12204	uc008hda.1	Rcl1	59028	38.1502	36.8081	52.7983	47.4687	3.58368	0.0583499	1	1
24377	uc009ngr.1|uc009ngs.1	Cirh1a	21771	36.781	38.3658	50.7655	49.2214	3.58368	0.0583499	1	1
9176	uc007zet.1	Cox17	12856	37.9934	36.9027	43.5385	56.1167	3.58368	0.0583499	1	1
3230	uc007jdi.1|uc007jdj.1|uc007jdk.1	Mrpl55	67212	29.5504	27.0986	36.2795	42.6432	3.57451	0.0586728	1	1
8173	uc007wif.1|uc007wig.1|uc007wih.1|uc007wii.1	Scrib	105782	39.6757	41.8815	44.5386	63.4853	3.56908	0.0588648	1	1
11786	uc008fzt.1|uc008fzu.1|uc008fzv.1	Adrbk1	110355	31.1002	32.4916	38.1279	48.314	3.56457	0.059025	1	1
9870	uc008bch.1	Rhot2	214952	29.9199	33.0583	39.2685	46.9567	3.56457	0.059025	1	1
6016	uc007qrr.1|uc007qrs.1	Tmed9	67511	82.4129	73.4009	93.7044	96.3706	3.55684	0.0593005	1	1
26783	uc009tmp.1|uc009tmq.1	Idh3g	15929	87.3832	77.5235	95.4357	106.181	3.54672	0.0596634	1	1
2062	uc007gak.1|uc007gal.1|uc007gam.1	Med16	216154	25.9257	25.9839	28.9164	44.2169	3.54479	0.0597329	1	1
13889	uc008lpe.1|uc008lpf.1	Aven	74268	19.4806	18.4324	26.6814	28.2607	3.54456	0.059741	1	1
20305	uc009cyg.1|uc009cyh.1	Slc6a6	21366	17.4776	19.536	26.9546	27.9891	3.54456	0.059741	1	1
2554	uc007hhb.1|uc007hhc.1|uc007hhd.1	Lrig3	320398	28.0931	26.9197	19.6833	17.118	3.54456	0.059741	1	1
5437	uc007pht.1|uc007phu.1	Ncapg2	76044	17.469	18.1235	8.50216	11.957	3.5374	0.0599994	1	1
24934	uc009otv.1|uc009otw.1|uc009otx.1	Chek1	12649	17.501	16.9476	10.7633	9.50847	3.5374	0.0599994	1	1
19153	uc008zzw.1	Polr2j	20022	99.3131	107.907	125.315	121.644	3.5288	0.0603113	1	1
8440	uc007xbh.1	Ttll12	223723	51.4883	53.7303	65.7655	68.1855	3.52751	0.0603582	1	1
11728	uc008fut.1|uc008fuu.1	Cndp2	66054	25.3145	21.7151	33.6045	33.0229	3.527	0.0603771	1	1
1752	uc007fgh.1	Tysnd1	71767	22.4273	24.9702	25.9709	41.0492	3.527	0.0603771	1	1
10719	uc008ddd.1|uc008dde.1	Dus3l	224907	20.9567	21.0285	21.8924	38.5376	3.52501	0.0604496	1	1
12852	uc008jbl.1|uc008jbm.1|uc008jbn.1	D2Wsu81e	227695	28.8317	29.182	34.8796	44.991	3.52226	0.06055	1	1
17058	uc008ubt.1	Kti12	100087	30.4458	34.0164	39.4582	48.2957	3.51699	0.0607428	1	1
26993	uc009ubs.1	Gm784	N/A	39.618	47.2467	30.7562	33.1961	3.51699	0.0607428	1	1
11031	uc008dzb.1|uc008dzc.1|uc008dzd.1|uc008dze.1	Arhgap12	75415	12.2165	10.6322	5.68811	6.42155	3.51643	0.0607631	1	1
17410	uc008vba.1	AF357401	N/A	5.57683	6.02577	7.8827	14.5927	3.51643	0.0607631	1	1
9449	uc007zxy.1|uc007zxz.1|uc007zya.1|uc007zyb.1	Son	20658	63.2143	62.6247	46.7395	50.8714	3.50917	0.0610299	1	1
26922	uc009twh.1	Kif4	16571	25.9347	24.2459	14.5839	17.7909	3.50669	0.0611214	1	1
177	uc007ass.1	Aff3	16764	48.3201	53.7095	40.8799	36.02	3.50306	0.0612555	1	1
10712	uc008dco.1|uc008dcp.1	Lonp1	74142	43.1453	40.9558	49.2022	60.7303	3.49504	0.0615528	1	1
23433	uc009krz.1	AK011549	N/A	34.2264	19.1391	39.3041	34.8721	3.48844	0.0617988	1	1
24797	uc009ojn.1|uc009ojo.1|uc009ojp.1|uc009ojq.1|uc009ojr.1|uc009ojs.1	Dnmt1	13433	100.469	99.367	117.656	120.208	3.48518	0.0619205	1	1
11961	uc008gno.1|uc008gnp.1|uc008gnq.1	AK172428	N/A	52.8933	45.6351	62.6308	63.5222	3.47796	0.0621915	1	1
5549	uc007ppy.1	Trim27	19720	77.3363	82.1264	93.9255	99.8328	3.47596	0.0622665	1	1
14533	uc008nfd.1|uc008nfe.1	Rbck1	24105	33.4858	32.4646	36.4177	52.1271	3.47066	0.0624665	1	1
3445	uc007jup.1|uc007juq.1	Pelp1	75273	44.3512	48.491	57.6097	60.9665	3.46447	0.0627007	1	1
23944	uc009mco.1|uc009mcp.1|uc009mcq.1|uc009mcr.1|uc009mcs.1|uc009mct.1	Use1	67023	29.3654	25.3416	32.3976	43.4852	3.43387	0.0638724	1	1
11208	uc008env.1|uc008enw.1	Eif4ebp3	108112	25.5999	24.8595	16.5254	17.2586	3.42304	0.0642926	1	1
8390	uc007wyh.1|uc007wyi.1	Srebf2	20788	71.0486	72.007	83.4574	93.2343	3.41991	0.0644146	1	1
8447	uc007xbx.1	Samm50	68653	73.7992	69.1464	88.9676	86.9941	3.41991	0.0644146	1	1
4072	uc007lme.1	Rab5c	19345	83.611	78.0106	94.5293	102.01	3.41768	0.0645015	1	1
22976	uc009jkj.1|uc009jkk.1|uc009jkl.1	6330503K22Rik	101565	17.8093	18.357	8.94857	12.6408	3.41292	0.0646881	1	1
21505	uc009fxy.1	Fbl	14113	11.6104	10.0189	12.0798	24.0955	3.41292	0.0646881	1	1
3162	uc007izj.1	Atox1	11927	83.4372	70.0666	87.7543	98.5806	3.40569	0.064972	1	1
153	uc007aqx.1	Actr1b	226977	82.2255	81.2771	98.3877	100.086	3.39869	0.0652483	1	1
2977	uc007ils.1|uc007ilt.1|uc007ilu.1|uc007ilv.1|uc007ilw.1|uc007ilx.1	Hmmr	15366	10.333	9.70647	4.92074	5.45379	3.39798	0.0652763	1	1
7317	uc007ucb.1|uc007ucc.1	Cenpj	219103	11.3216	8.61425	3.48911	6.85138	3.39798	0.0652763	1	1
3616	uc007khc.1	Taok1	216965	9.63444	9.66614	4.24696	6.06691	3.39798	0.0652763	1	1
1647	uc007eyr.1	Snx3	54198	69.0592	66.2899	89.6372	76.9328	3.3971	0.0653111	1	1
20362	uc009ddd.1	Lrrn1	16979	4.67431	5.62143	2.05471	1.63209	3.39696	0.0653167	1	1
6389	uc007rtb.1|uc007rtc.1|uc007rtd.1|uc007rte.1|uc007rtf.1	Cenpk	60411	5.70761	5.06345	2.46903	2.1188	3.39696	0.0653167	1	1
18872	uc008zdg.1|uc008zdh.1	Cabp1	29867	1.89821	2.4169	4.22638	6.81165	3.39696	0.0653167	1	1
5327	uc007ozh.1|uc007ozi.1	Bcl11b	58208	5.80955	4.62632	2.4892	2.39446	3.39696	0.0653167	1	1
1148	uc007dnm.1	Ndufs2	226646	119.612	119.226	143.904	136.662	3.39601	0.0653545	1	1
21672	uc009gjo.1|uc009gjp.1	Lrp3	null	19.3209	20.4894	22.9354	34.2417	3.39506	0.065392	1	1
5970	uc007qnw.1	Msx2	17702	22.4864	19.0115	11.6919	13.5296	3.38684	0.0657188	1	1
15662	uc008qls.1|uc008qlt.1	Car14	23831	55.9418	54.1244	77.616	61.1664	3.38519	0.0657847	1	1
6176	uc007rcm.1|uc007rcn.1|uc007rco.1	Nsun2	28114	59.6602	58.9588	70.8618	77.6854	3.36526	0.0665852	1	1
17499	uc008vhf.1	Pnrc2	52830	49.388	48.7519	41.1279	32.8948	3.35979	0.0668066	1	1
15203	uc008pdf.1|uc008pdg.1	Pcdh18	73173	48.7376	48.5549	40.0183	33.6321	3.35979	0.0668066	1	1
24492	uc009not.1	Gcsh	68133	10.1292	9.1307	14.5705	16.5729	3.35058	0.0671815	1	1
4768	uc007nmx.1|uc007nmy.1	Hectd1	207304	26.9501	24.9922	13.5944	21.0996	3.34331	0.0674788	1	1
11943	uc008gmh.1|uc008gmi.1	Slc3a2	17254	33.2024	34.789	42.5762	47.9261	3.33875	0.0676662	1	1
19557	uc009bao.1	Lsm8	N/A	82.9677	64.4693	106.818	73.1435	3.33595	0.0677812	1	1
628	uc007cbs.1	Gpc1	14733	97.4509	90.4043	99.5166	123.933	3.33541	0.0678033	1	1
8458	uc007xcr.1	5031439G07Rik	223739	19.2839	21.4762	26.3038	32.2131	3.32497	0.0682354	1	1
3743	uc007kpz.1	Ddx52	78394	28.3557	30.2606	19.58	20.0422	3.32497	0.0682354	1	1
9050	uc007yvq.1	BC027835	N/A	27.8295	29.5881	24.2085	16.0726	3.32497	0.0682354	1	1
26486	uc009stl.1|uc009stm.1	Ube1x	N/A	189.82	190.753	230.64	202.352	3.32413	0.0682701	1	1
9492	uc008ach.1	Dscr2	N/A	43.4113	45.7551	60.8493	54.4358	3.32276	0.0683272	1	1
7039	uc007til.1|uc007tim.1|uc007tin.1|uc007tio.1|uc007tip.1|uc007tiq.1|uc007tir.1|uc007tis.1|uc007tit.1|uc007tiu.1|uc007tiv.1|uc007tiw.1|uc007tix.1|uc007tiy.1|uc007tiz.1|uc007tja.1|uc007tjb.1|uc007tjc.1|uc007tjd.1|uc007tje.1|uc007tjf.1	Ktn1	16709	11.5174	11.5481	4.51664	8.08953	3.32023	0.0684321	1	1
20332	uc009dak.1	Tmf1	232286	14.2782	13.6142	6.86292	9.10634	3.31456	0.0686689	1	1
19699	uc009bli.1	AK163747	N/A	7.94405	9.35413	3.94504	3.59354	3.31389	0.0686969	1	1
26569	uc009sye.1|uc009syf.1	Upf3b	68134	7.82525	8.83524	2.76188	4.96208	3.31389	0.0686969	1	1
22961	uc009jjg.1|uc009jjh.1|uc009jji.1	Pik3c2a	18704	9.4292	8.49791	3.04817	4.51618	3.31389	0.0686969	1	1
6805	uc007stw.1|uc007stx.1	Ccdc66	320234	9.44305	8.03436	2.87651	4.67079	3.31389	0.0686969	1	1
8200	uc007wkx.1|uc007wky.1|uc007wkz.1|uc007wla.1	Cpsf1	94230	46.4308	50.6974	56.4034	68.2886	3.3069	0.0689896	1	1
26055	uc009rpf.1	Gpx1	14775	267.781	300.877	312.348	319.507	3.30626	0.0690163	1	1
24562	uc009ntb.1|uc009ntc.1	2310061F22Rik	N/A	14.8932	16.4459	17.9655	28.7526	3.30546	0.0690498	1	1
19175	uc009aca.1|uc009acb.1|uc009acc.1	Ars2	N/A	94.0288	94.6112	110.394	115.97	3.30318	0.0691459	1	1
4092	uc007loa.1|uc007lob.1|uc007loc.1|uc007lod.1	Vps25	28084	34.2557	35.4616	47.9285	43.6008	3.29698	0.0694073	1	1
16334	uc008sje.1|uc008sjf.1|uc008sjg.1	Cntfr	12804	17.2495	19.8634	9.65218	13.0401	3.29697	0.0694076	1	1
475	uc007bpn.1|uc007bpo.1|uc007bpp.1|uc007bpq.1|uc007bpr.1	Obsl1	98733	26.3638	25.471	30.7535	40.4031	3.29353	0.0695532	1	1
22519	uc009iih.1|uc009iii.1	4632434I11Rik	74041	6.95935	6.78509	2.93561	3.04322	3.29132	0.0696472	1	1
23083	uc009jst.1|uc009jsu.1|uc009jsv.1	Aldoa	11674	47.1249	43.2489	51.9168	63.9962	3.29032	0.0696894	1	1
1656	uc007ezj.1	AK122525	N/A	13.4494	13.953	18.7421	23.11	3.28705	0.0698283	1	1
3844	uc007kxm.1|uc007kxn.1|uc007kxo.1|uc007kxp.1|uc007kxq.1|uc007kxr.1	Mbtd1	103537	21.3951	21.3982	14.5581	11.8463	3.28705	0.0698283	1	1
23078	uc009jsm.1|uc009jsn.1	Mapk3	26417	14.4311	12.6101	18.5514	22.8857	3.28705	0.0698283	1	1
18584	uc008yoa.1|uc008yob.1	Atp5k	11958	16.353	10.6571	24.2757	18.4017	3.28705	0.0698283	1	1
2082	uc007gch.1	Mum1	68114	37.379	38.8445	42.3846	57.6377	3.28295	0.0700032	1	1
10178	uc008bqp.1|uc008bqq.1	Rpl10a	19896	28.1696	35.0441	28.3702	56.8898	3.28242	0.0700255	1	1
8194	uc007wkh.1|uc007wki.1|uc007wkj.1|uc007wkk.1|uc007wkl.1	Hsf1	15499	29.7608	32.8966	37.5544	47.2837	3.28242	0.0700255	1	1
3419	uc007jsn.1	0610025P10Rik	N/A	27.762	28.5106	34.7753	42.7375	3.27997	0.0701302	1	1
2085	uc007gck.1|uc007gcl.1|uc007gcm.1	Dazap1	70248	89.3654	90.9847	102.556	113.218	3.27725	0.0702465	1	1
4638	uc007nco.1|uc007ncp.1	Pdia6	71853	179.122	149.409	197.399	178.814	3.27527	0.0703315	1	1
14120	uc008mil.1|uc008mim.1	Nol5a	N/A	84.2671	85.759	96.1662	109.301	3.27143	0.0704963	1	1
17504	uc008vhm.1|uc008vhn.1	Lypla2	26394	59.0645	72.8342	75.8749	86.5895	3.26365	0.0708313	1	1
26649	uc009tds.1	Rap2c	72065	27.8487	30.648	27.208	13.8318	3.25773	0.0710876	1	1
23454	uc009ktp.1	Ctxn1	330695	69.8529	80.6352	81.4525	103.295	3.25602	0.0711615	1	1
22543	uc009ijr.1	Clns1a	12729	50.5901	47.8767	63.4074	62.5661	3.24782	0.0715185	1	1
10388	uc008cgi.1|uc008cgj.1|uc008cgk.1	Bat2	53761	148.391	169.369	179.183	184.595	3.24634	0.0715832	1	1
25099	uc009pcc.1	DQ688647	N/A	47.3433	29.863	55.0196	45.7185	3.24583	0.0716053	1	1
17826	uc008weu.1	Mrpl20	66448	54.7806	60.6675	78.8222	66.2564	3.22889	0.0723499	1	1
19638	uc009bgh.1	Podxl	27205	10.5556	9.29218	16.1471	17.0586	3.22145	0.0726793	1	1
5556	uc007pql.1	Zfp187	432731	15.8773	16.7059	10.0432	9.89078	3.22145	0.0726793	1	1
8711	uc007xuk.1|uc007xul.1	Eif4b	75705	64.7274	60.1061	76.497	78.8259	3.22046	0.072723	1	1
10162	uc008bpg.1	Nudt3	56409	67.8226	66.3042	80.4481	84.8018	3.21983	0.0727512	1	1
2783	uc007hwt.1	Mrps24	64660	35.9586	35.2129	38.0957	55.5025	3.21652	0.0728982	1	1
23505	uc009kxa.1|uc009kxb.1	Lamp1	16783	82.6154	79.6228	99.9615	96.6035	3.2159	0.072926	1	1
24830	uc009omg.1|uc009omh.1|uc009omi.1|uc009omj.1	Ldlr	16835	23.2624	23.7333	31.6613	33.5044	3.20992	0.0731932	1	1
12814	uc008iya.1|uc008iyb.1|uc008iyc.1|uc008iyd.1	Olfm1	56177	22.4433	24.844	32.2305	34.4945	3.20992	0.0731932	1	1
18045	uc008wwq.1|uc008wwr.1	Preb	50907	41.3437	37.411	47.5495	54.0521	3.20955	0.0732096	1	1
5409	uc007pfi.1|uc007pfj.1	Cdca4	71963	72.7173	71.3814	89.3821	86.961	3.20535	0.0733976	1	1
5339	uc007pag.1|uc007pah.1|uc007pai.1|uc007paj.1	Wars	22375	58.1425	58.6925	74.9036	70.7976	3.20423	0.0734481	1	1
19320	uc009amf.1|uc009amg.1	Bud31	231889	91.9544	82.5	131.466	78.294	3.2029	0.0735078	1	1
21305	uc009fkf.1|uc009fkg.1|uc009fkh.1|uc009fki.1	Sympk	68188	46.1548	46.6814	54.018	65.1046	3.19672	0.0737861	1	1
3306	uc007jjk.1|uc007jjl.1	AK010427	N/A	24.1761	17.5723	29.6706	29.9534	3.19317	0.0739467	1	1
13201	uc008kea.1|uc008keb.1	Hoxd8	15437	15.9371	22.4044	14.3019	9.70639	3.18872	0.0741481	1	1
2489	uc007hca.1|uc007hcb.1|uc007hcc.1|uc007hcd.1|uc007hce.1|uc007hcf.1	Cnot2	72068	40.2052	39.6739	30.2255	28.6182	3.18484	0.0743241	1	1
11945	uc008gmm.1	Wdr74	107071	42.808	43.3706	56.0829	55.2571	3.18116	0.0744918	1	1
16195	uc008rzd.1|uc008rze.1|uc008rzf.1	Ccne2	12448	10.1512	11.3285	6.69376	4.27164	3.17796	0.0746379	1	1
2123	uc007gfj.1|uc007gfk.1	Lmnb2	16907	40.9257	37.7147	44.7778	58.3186	3.17407	0.0748157	1	1
18774	uc008yym.1|uc008yyn.1	Sart3	53890	57.1312	53.2048	64.4233	74.4639	3.16804	0.0750925	1	1
7743	uc007via.1|uc007vib.1|uc007vic.1|uc007vid.1	Rnasen	14000	54.4906	55.8649	73.4344	64.781	3.16804	0.0750925	1	1
25877	uc009rau.1|uc009rav.1	Plod2	26432	14.843	14.2339	11.1234	6.2116	3.16694	0.0751429	1	1
26601	uc009szp.1|uc009szq.1	Zbtb33	56805	13.8331	14.564	9.78847	7.06729	3.16694	0.0751429	1	1
26267	uc009sgh.1	Sacm1l	83493	15.112	14.1526	10.0621	7.01282	3.16694	0.0751429	1	1
21220	uc009ffp.1|uc009ffq.1|uc009ffr.1	Lig1	16881	99.2637	88.325	116.341	107.006	3.16505	0.0752301	1	1
8503	uc007xfq.1|uc007xfr.1	Plxnb2	140570	84.9086	82.3354	90.4956	111.177	3.14579	0.0761232	1	1
11629	uc008fna.1	AK158414	N/A	12.6766	12.2403	6.36528	7.55978	3.14507	0.0761568	1	1
18449	uc008ydt.1|uc008ydu.1|uc008ydv.1	Shroom3	27428	6.77406	7.2068	9.94752	14.5504	3.14507	0.0761568	1	1
21989	uc009hff.1	Ndn	17984	58.3598	53.0811	71.4782	67.9908	3.14259	0.0762726	1	1
9119	uc007zap.1|uc007zaq.1	Umps	22247	57.758	53.3229	72.7006	66.4864	3.14259	0.0762726	1	1
666	uc007cdm.1|uc007cdn.1	Sned1	208777	4.45178	5.39447	1.2065	2.05615	3.13949	0.0764178	1	1
19904	uc009byv.1	Evx1	14028	4.73045	4.04759	2.28909	1.4387	3.13949	0.0764178	1	1
14998	uc008onz.1	AK012506	N/A	5.33474	4.33608	1.85103	0.918097	3.13949	0.0764178	1	1
25800	uc009qus.1|uc009qut.1|uc009quu.1	Col12a1	12816	5.18814	3.75132	1.91442	1.09411	3.13949	0.0764178	1	1
15200	uc008pdb.1	AK021231	N/A	4.66602	3.91077	2.45415	0.625652	3.13949	0.0764178	1	1
9334	uc007zpy.1|uc007zpz.1	Epha3	13837	4.8151	3.61754	0.845096	1.53517	3.13949	0.0764178	1	1
1187	uc007dqp.1	Tagln2	21346	26.848	26.8813	42.4241	31.8858	3.13784	0.076495	1	1
4411	uc007mlm.1|uc007mln.1	Ube2o	217342	27.1568	26.9829	31.7826	41.6232	3.13784	0.076495	1	1
7244	uc007twp.1|uc007twq.1|uc007twr.1|uc007tws.1|uc007twt.1|uc007twu.1|uc007twv.1|uc007tww.1|uc007twx.1	Acin1	56215	92.3837	85.9502	97.9602	115.194	3.13719	0.0765256	1	1
20584	uc009dtt.1|uc009dtu.1	Ncapd2	68298	152.903	163.046	185.534	176.475	3.12334	0.0771783	1	1
26656	uc009teg.1|uc009teh.1	Gpc3	14734	412.947	384.298	376.521	350.667	3.12303	0.077193	1	1
20009	uc009cfh.1|uc009cfi.1|uc009cfj.1|uc009cfk.1|uc009cfl.1|uc009cfm.1|uc009cfn.1	Serbp1	66870	126.31	110.995	138.821	137.606	3.11599	0.0775274	1	1
24390	uc009nhr.1|uc009nhs.1	Nob1	67619	33.9024	33.0446	40.028	49.3474	3.11293	0.0776731	1	1
19262	uc009aih.1	Gna12	14673	49.6499	45.8057	54.0439	68.4358	3.10831	0.0778937	1	1
14515	uc008ndw.1	Nsfl1c	386649	17.1471	12.0804	17.6055	25.7291	3.10426	0.0780879	1	1
3783	uc007ktc.1	Dhx40	67487	21.2423	22.7206	17.4525	11.623	3.10426	0.0780879	1	1
9758	uc008ath.1|uc008ati.1|uc008atj.1|uc008atk.1	Flywch1	224613	38.0705	36.2935	46.474	51.4101	3.10296	0.0781499	1	1
13039	uc008jpw.2|uc008jpx.2	Epc2	227867	16.6748	17.1126	9.46141	12.3977	3.102	0.0781963	1	1
514	uc007bsy.1|uc007bsz.1|uc007bta.1|uc007btb.1	Trip12	14897	33.5651	33.6523	27.169	21.767	3.09918	0.0783319	1	1
24366	uc009nft.1|uc009nfu.1|uc009nfv.1|uc009nfw.1	Prmt7	214572	25.1453	23.9279	31.0773	36.5604	3.09918	0.0783319	1	1
18070	uc008wyt.1|uc008wyu.1	Mrpl33	66845	35.5947	24.7323	43.464	39.3375	3.0951	0.0785285	1	1
13129	uc008jxu.1|uc008jxv.1|uc008jxw.1|uc008jxx.1	Spc25	66442	20.4628	18.7178	14.0776	10.9984	3.0874	0.0789006	1	1
8502	uc007xfp.1	Mapk11	19094	11.0629	13.9482	18.377	20.7263	3.0874	0.0789006	1	1
805	uc007cmv.1	Mapkapk2	17164	63.2499	59.1318	82.3752	69.1475	3.08641	0.078949	1	1
13244	uc008khm.1|uc008khn.1	Nckap1	50884	66.0249	66.3632	55.5358	49.4121	3.08264	0.0791321	1	1
12424	uc008hsb.1|uc008hsc.1|uc008hsd.1|uc008hse.1|uc008hsf.1	Pprc1	226169	32.9046	35.2347	43.2296	46.5888	3.07327	0.0795894	1	1
24531	uc009nrf.1|uc009nrg.1	Cox4nb	18117	22.6292	20.8338	26.8691	34.6896	3.07147	0.0796776	1	1
11755	uc008fxn.1|uc008fxo.1|uc008fxp.1	Ndufs8	225887	66.4008	56.9564	70.2697	82.2659	3.06388	0.0800505	1	1
7720	uc007vgg.1	Bxdc2	N/A	28.4569	28.066	19.3643	20.2377	3.05855	0.0803132	1	1
218	uc007avr.1|uc007avs.1|uc007avt.1|uc007avu.1	Tpp2	22019	27.827	27.6658	21.5164	16.8281	3.05855	0.0803132	1	1
6040	uc007qtf.1	AK019388	N/A	199.579	233.305	327.292	159.467	3.05828	0.0803267	1	1
2892	uc007iff.1|uc007ifg.1|uc007ifh.1|uc007ifi.1	0610010F05Rik	71675	8.68966	8.6382	4.81838	4.4348	3.05818	0.0803315	1	1
20973	uc009epc.1	Pyroxd1	232491	9.41523	9.46665	4.00483	5.15996	3.05818	0.0803315	1	1
938	uc007cxd.1	Trove2	20822	9.37425	8.59167	4.27842	5.37514	3.05818	0.0803315	1	1
21195	uc009feb.1|uc009fec.1	Zfp606	67370	9.19831	8.7397	4.12651	5.21735	3.05818	0.0803315	1	1
18224	uc008xlt.1|uc008xlu.1|uc008xlv.1	Pcdh7	54216	5.38321	3.69599	7.09016	10.5797	3.05818	0.0803315	1	1
12680	uc008iob.1|uc008ioc.1	Mastl	67121	8.5537	8.52855	4.01303	5.29669	3.05818	0.0803315	1	1
12465	uc008hvq.1	Gsto1	14873	69.5635	71.9323	100.404	72.7852	3.05574	0.0804525	1	1
9169	uc007zej.1	Fstl1	14314	94.8003	89.4976	85.2866	66.5796	3.05224	0.0806257	1	1
21623	uc009gga.1|uc009ggb.1	Tmem147	69804	48.7926	48.5987	58.8167	64.6238	3.05204	0.0806356	1	1
466	uc007bot.1|uc007bou.1|uc007bov.1|uc007bow.1	Dnpep	13437	26.3557	24.0884	30.8326	38.4545	3.04664	0.0809046	1	1
11204	uc008enk.1	Pfdn1	67199	60.3572	54.9566	64.1636	79.2817	3.04475	0.0809984	1	1
26400	uc009snd.1	Pqbp1	54633	60.1157	54.6219	71.5371	71.2734	3.04475	0.0809984	1	1
12425	uc008hsg.1|uc008hsh.1|uc008hsi.1|uc008hsj.1	Nolc1	70769	61.1665	62.5027	79.1688	73.6642	3.04167	0.0811523	1	1
21813	uc009gso.1|uc009gsp.1|uc009gsq.1|uc009gsr.1	Scaf1	233208	41.0708	41.9289	42.649	64.3939	3.03969	0.0812513	1	1
14094	uc008mgt.1|uc008mgu.1	Mertk	17289	14.9348	14.5008	10.3902	8.33549	3.03206	0.0816344	1	1
9157	uc007zda.1|uc007zdb.1	Iqcb1	320299	15.0276	15.3327	9.78897	7.91767	3.03206	0.0816344	1	1
1744	uc007ffz.1	DQ716436	N/A	70.4961	84.1483	101.652	83.8537	3.01623	0.082435	1	1
12741	uc008isn.1	Edf1	59022	25.364	20.0978	25.6188	36.5926	3.01405	0.082546	1	1
8165	uc007whq.1|uc007whr.1	Pycrl	66194	45.154	39.4549	49.5491	58.067	3.00786	0.0828615	1	1
15306	uc008pkn.1|uc008pko.1	Ssr3	67437	94.2545	92.6434	100.526	53.8541	2.99854	0.0833398	1	1
20264	uc009cwg.1	Plxna1	18844	38.4894	38.7785	43.1775	56.851	2.99717	0.0834102	1	1
4071	uc007llz.1|uc007lma.1|uc007lmb.1|uc007lmc.1|uc007lmd.1	Gcn5l2	N/A	34.2958	42.5191	49.0398	51.239	2.99717	0.0834102	1	1
12415	uc008hrg.1|uc008hrh.1|uc008hri.1|uc008hrj.1	Fgf8	14179	40.1281	29.7074	42.0497	50.0709	2.99691	0.0834237	1	1
1997	uc007fwa.1	Ube2g2	22213	36.0645	34.4905	45.0367	47.4734	2.99691	0.0834237	1	1
26022	uc009rmd.1	Ifrd2	15983	27.645	28.9446	33.5227	43.2707	2.99626	0.0834571	1	1
5443	uc007pid.1	Cdca7l	217946	24.0447	26.7812	34.4076	35.5982	2.99585	0.0834779	1	1
24383	uc009ngz.1	Nip7	66164	24.6214	25.8952	36.7098	32.5803	2.99585	0.0834779	1	1
24545	uc009nsb.1	Klhdc4	234825	14.1537	12.1794	18.6997	21.4787	2.99238	0.0836572	1	1
3845	uc007kxs.1|uc007kxt.1	Nme2	18103	13.0941	8.8458	12.9944	21.897	2.99117	0.0837199	1	1
6265	uc007rjo.1	Tmem167	66074	17.6362	16.6259	12.2986	9.66034	2.99117	0.0837199	1	1
4583	uc007myt.1|uc007myu.1|uc007myv.1	Atad2b	320817	13.2547	13.0198	6.64018	8.00455	2.98769	0.0839	1	1
9813	uc008ayc.1	NR_002897	N/A	7.89674	6.61302	11.1152	14.7574	2.98769	0.0839	1	1
1247	uc007dub.1|uc007duc.1|uc007dud.1|uc007due.1|uc007duf.1|uc007dug.1	Cep170	545389	11.3303	10.9527	6.00403	6.30943	2.98512	0.0840331	1	1
15466	uc008pxi.1|uc008pxj.1	Ash1l	192195	11.1842	11.3456	5.09257	6.80613	2.98512	0.0840331	1	1
3130	uc007iws.1|uc007iwt.1|uc007iwu.1	Rad50	19360	11.0532	10.7459	5.1326	7.32304	2.98512	0.0840331	1	1
8399	uc007wzc.1	Ndufa6	67130	82.2917	74.3965	93.282	94.7404	2.98105	0.0842445	1	1
16263	uc008sel.1|uc008sem.1|uc008sen.1	Epha7	13841	7.66362	6.50468	2.79426	3.50192	2.97686	0.0844632	1	1
20573	uc009dsr.1|uc009dss.1	Cops7a	26894	42.9125	41.7961	48.3922	60.6009	2.97669	0.0844717	1	1
9285	uc007znj.1	4631422O05Rik	N/A	6.43133	6.38869	2.36198	2.68312	2.96989	0.0848277	1	1
21202	uc009feh.1|uc009fei.1	Zfp329	67230	5.78973	6.04095	2.47152	3.33602	2.96989	0.0848277	1	1
24155	uc009mse.1|uc009msf.1|uc009msg.1|uc009msh.1|uc009msi.1	Chd9	109151	5.80908	6.15381	2.40165	3.2286	2.96989	0.0848277	1	1
15356	uc008pog.1|uc008poh.1	Glrb	14658	5.89524	5.59363	3.2474	2.04833	2.96989	0.0848277	1	1
25841	uc009qyg.1	4922501C03Rik	382090	6.04052	5.7546	1.75062	3.10024	2.96989	0.0848277	1	1
8746	uc007xxe.1	Hoxc5	15424	6.64955	4.5877	1.61144	2.93296	2.96989	0.0848277	1	1
20236	uc009cuo.1	DQ721397	N/A	2.20781	3.29534	4.99847	7.3624	2.96989	0.0848277	1	1
2798	uc007hyc.1|uc007hyd.1	Ddx56	52513	31.117	33.2439	43.116	42.0843	2.96961	0.0848424	1	1
17784	uc008wbo.1	AK213563	N/A	50.0336	27.9571	33.6528	66.7377	2.96349	0.0851638	1	1
17563	uc008vlt.1|uc008vlu.1	2310028O11Rik	433771	104.582	96.246	128.715	107.511	2.96224	0.0852295	1	1
2075	uc007gbt.1|uc007gbu.1|uc007gbv.1	Stk11	20869	36.3531	34.5031	36.9015	55.8269	2.96014	0.0853408	1	1
1628	uc007exi.1	Wasf1	83767	21.0564	25.4468	34.6515	28.638	2.95874	0.0854144	1	1
23986	uc009mfp.1	Ap1m1	11767	52.2917	58.431	65.1484	71.5103	2.95732	0.0854894	1	1
23439	uc009ksk.2	Trappc5	66682	25.6595	26.2828	33.453	37.8478	2.94674	0.0860508	1	1
4898	uc007nwo.1|uc007nwp.1|uc007nwq.1|uc007nwr.1	Hif1a	15251	35.774	34.6257	31.5335	20.0301	2.94674	0.0860508	1	1
7288	uc007uao.1	2610027L16Rik	67842	42.1645	44.2177	59.5373	49.977	2.94616	0.0860817	1	1
12801	uc008ixa.1|uc008ixb.1	Adamtsl2	77794	4.19887	3.15151	1.1738	1.34125	2.94194	0.0863071	1	1
16765	uc008tjz.1	Nfib	18028	3.73481	3.09319	1.18095	1.16472	2.94194	0.0863071	1	1
2428	uc007gxv.1|uc007gxw.1	Cep290	null	3.38057	3.50474	0.501612	0.879538	2.94194	0.0863071	1	1
25865	uc009qzu.1|uc009qzv.1	Ctsh	13036	1.1567	1.47707	4.02779	3.17285	2.94194	0.0863071	1	1
13007	uc008jnf.1	Crb2	null	1.47175	1.09918	2.36184	4.59954	2.94194	0.0863071	1	1
17564	uc008vlv.1|uc008vlw.1|uc008vlx.1|uc008vly.1	Capzb	12345	109.86	104.987	126.967	124.739	2.93455	0.0867027	1	1
8489	uc007xep.1	Creld2	76737	44.2177	35.1635	47.4055	54.6703	2.93057	0.0869169	1	1
13543	uc008kxa.1|uc008kxb.1|uc008kxc.1|uc008kxd.1|uc008kxe.1	Dgkz	104418	33.0421	32.3572	37.3703	49.3735	2.93002	0.0869465	1	1
13019	uc008joa.1	Arpc5l	74192	32.5446	31.653	44.7397	40.7786	2.93002	0.0869465	1	1
8641	uc007xqb.1	Smarcd1	83797	68.6988	80.421	94.3612	85.5745	2.92531	0.0872005	1	1
17132	uc008uha.1|uc008uhb.1	Akr1a4	58810	175.888	163.471	196.022	188.533	2.92462	0.0872377	1	1
7737	uc007vhk.1	Zfr	22763	47.9975	46.1416	34.0246	37.5697	2.92426	0.0872573	1	1
11923	uc008gkn.1|uc008gko.1|uc008gkp.1	Rcor2	104383	73.9764	86.157	88.9986	102.816	2.91311	0.0878622	1	1
26504	uc009suq.1	Agtr2	11609	3.16038	1.8224	1.43824	0.381248	2.91103	0.0879756	1	1
21585	uc009gdp.1	Cox7a1	12865	1.67206	2.67902	0.835781	0.242241	2.91103	0.0879756	1	1
1602	uc007eve.1|uc007evf.1	Hdac2	15182	72.0826	66.8562	67.5245	43.7707	2.91001	0.0880313	1	1
10261	uc008bxm.1	9030612M13Rik	N/A	15.5322	15.2296	9.45964	9.83258	2.90831	0.0881244	1	1
8893	uc007yii.1|uc007yij.1|uc007yik.1|uc007yil.1|uc007yim.1|uc007yin.1|uc007yio.1	Dnm1l	74006	15.891	15.2318	7.50962	10.7932	2.90831	0.0881244	1	1
24789	uc009ojd.1	Pin1	23988	15.4339	11.714	17.4969	23.5843	2.90307	0.0884111	1	1
24283	uc009mzx.1	Cdh5	12562	25.296	27.7895	34.9084	37.0437	2.89922	0.0886222	1	1
8238	uc007woc.1|uc007wod.1|uc007woe.1	Myh9	17886	57.8716	46.1148	54.8856	75.3037	2.89486	0.0888623	1	1
9910	uc008bff.1|uc008bfg.1	Bak1	12018	34.4574	32.3414	46.2573	41.3726	2.89147	0.0890495	1	1
12459	uc008hvf.1|uc008hvg.1	Slk	20874	18.9327	17.4454	9.42627	14.4473	2.88805	0.0892391	1	1
10631	uc008cwl.1|uc008cwm.1|uc008cwn.1|uc008cwo.1	Foxp4	74123	45.1417	42.9663	47.3937	64.9251	2.88695	0.0892997	1	1
20042	uc009cif.1	Usp39	28035	56.6659	56.0102	76.3818	64.0619	2.88692	0.0893016	1	1
15772	uc008qsu.1	Bcas2	68183	91.1322	71.1422	105.696	88.008	2.88029	0.0896698	1	1
1724	uc007fee.1	Ddit4	74747	34.187	24.5136	20.6391	21.3332	2.87505	0.089962	1	1
7471	uc007unf.1	2610301G19Rik	219158	75.8029	76.1188	89.6806	92.9256	2.87276	0.09009	1	1
7333	uc007udd.1	N6amt2	68043	33.4734	27.1697	45.3217	34.8773	2.86694	0.0904166	1	1
10303	uc008cah.1	H2-Ke2	14976	53.8662	43.493	57.7143	64.0244	2.86011	0.0908012	1	1
9807	uc008axr.1	Gfer	11692	19.3384	18.3366	24.7102	28.4429	2.85962	0.0908289	1	1
6435	uc007rws.1|uc007rwt.1|uc007rwu.1	Skiv2l2	72198	34.2426	32.469	23.9655	23.7175	2.85403	0.091145	1	1
4513	uc007mtp.1|uc007mtq.1	Pcyt2	68671	24.8147	23.158	25.873	40.0191	2.85403	0.091145	1	1
11814	uc008gby.1|uc008gbz.1	Brms1	107392	34.696	32.1135	39.4425	49.0989	2.85393	0.0911509	1	1
22467	uc009iek.1|uc009iel.1|uc009iem.1|uc009ien.1	Zfand6	65098	36.3636	37.1595	32.6858	20.5768	2.85322	0.0911912	1	1
25725	uc009qoy.1|uc009qoz.1	Grinl1a	28015	228.574	236.985	293.692	225.453	2.85315	0.0911949	1	1
21802	uc009grk.1|uc009grl.1	Ptov1	84113	153.54	163.702	159.316	202.734	2.84905	0.091428	1	1
22000	uc009hgg.1|uc009hgh.1	Mphosph10	67973	15.38	11.9238	6.04265	9.9963	2.84548	0.0916314	1	1
18332	uc008xvc.1	Cep135	381644	8.7199	9.57767	4.04636	6.04373	2.83976	0.0919579	1	1
18279	uc008xql.1|uc008xqm.1|uc008xqn.1|uc008xqo.1	Guf1	231279	8.9602	9.56212	5.07088	4.72943	2.83976	0.0919579	1	1
11309	uc008evj.1	DQ553245	N/A	9.66399	8.99294	3.51221	6.12514	2.83976	0.0919579	1	1
11407	uc008fcf.1	AK040485	N/A	8.83742	9.56905	4.72673	5.13228	2.83976	0.0919579	1	1
14664	uc008nph.1	Ctnnbl1	66642	44.3835	38.1607	52.5722	52.4079	2.83605	0.0921704	1	1
18911	uc008zge.1|uc008zgf.1	Fbxw8	231672	48.9246	48.8509	56.8947	65.8605	2.83412	0.0922815	1	1
21441	uc009fth.1	Bckdha	12039	29.0644	31.8452	30.6511	49.6529	2.82629	0.0927324	1	1
7676	uc007vck.1	Oxct1	67041	52.2904	44.7177	43.4661	32.0534	2.82168	0.0929992	1	1
10715	uc008dct.1|uc008dcu.1|uc008dcv.1|uc008dcw.1	Ranbp3	71810	37.052	37.9761	40.5022	55.5951	2.82168	0.0929992	1	1
17833	uc008wfh.1	Cpsf3l	71957	38.0549	36.7216	48.313	49.1282	2.82168	0.0929992	1	1
2107	uc007gec.1|uc007ged.1	Btbd2	208198	59.2205	56.709	62.6351	79.6308	2.81979	0.0931085	1	1
17250	uc008upi.1|uc008upj.1|uc008upk.1|uc008upl.1|uc008upm.1|uc008upn.1|uc008upo.1|uc008upp.1|uc008upq.1|uc008upr.1|uc008ups.1|uc008upt.1	Macf1	11426	20.7532	20.9529	11.262	16.5761	2.81897	0.0931561	1	1
22418	uc009iaw.1|uc009iax.1|uc009iay.1	Blm	12144	21.3026	21.2312	14.9017	13.0646	2.81897	0.0931561	1	1
473	uc007bph.1|uc007bpi.1|uc007bpj.1|uc007bpk.1	D1Bwg1363e	N/A	12.8575	15.0903	17.2799	24.6311	2.81897	0.0931561	1	1
8384	uc007wxw.1|uc007wxx.1	D15Wsu75e	N/A	19.976	22.6918	34.548	24.9301	2.81871	0.0931715	1	1
9826	uc008ayz.1	Nme3	79059	25.4743	17.6541	29.5855	29.7023	2.81871	0.0931715	1	1
23938	uc009mcc.1	NR_002901	N/A	7.11707	6.3301	11.7251	10.5796	2.81465	0.0934072	1	1
25176	uc009pil.1|uc009pim.1|uc009pin.1	Zbtb16	235320	5.98125	6.64876	10.5852	11.827	2.81465	0.0934072	1	1
7794	uc007vlz.1	Stk3	56274	12.7304	10.0935	6.62722	6.16897	2.81465	0.0934072	1	1
14795	uc008nza.1|uc008nzb.1	Ddx27	228889	25.8219	23.3224	31.5671	35.4069	2.80442	0.0940047	1	1
18880	uc008zdt.1	Cox6a1	12861	116.178	135.951	119.619	170.673	2.80352	0.0940577	1	1
10703	uc008dbp.1|uc008dbq.1|uc008dbr.1|uc008dbs.1	Uhrf1	18140	48.8421	41.5059	55.1258	60.1786	2.80248	0.0941188	1	1
24067	uc009mln.1	Samd1	666704	46.2731	44.7201	53.9591	61.1455	2.80248	0.0941188	1	1
17444	uc008vdb.1	Atpbd1b	N/A	20.014	18.24	23.0552	30.9289	2.79681	0.0944522	1	1
486	uc007bqo.1|uc007bqp.1	Acsl3	74205	28.0264	26.1253	22.4684	16.4696	2.79681	0.0944522	1	1
6388	uc007rsz.1|uc007rta.1	Ppwd1	238831	16.3775	16.4753	9.69924	10.0229	2.79435	0.0945972	1	1
11616	uc008fly.1	Impa2	114663	16.681	16.3526	20.1193	27.7412	2.79388	0.0946251	1	1
13789	uc008ljb.1|uc008ljc.1|uc008ljd.1|uc008lje.1	Caprin1	53872	204.607	197.148	188.154	167.558	2.79327	0.0946607	1	1
3676	uc007klc.1	Suz12	52615	18.4398	18.8928	12.6768	11.1874	2.79185	0.0947446	1	1
18103	uc008xbx.1	AK189470	N/A	20.4191	17.4395	12.606	10.9162	2.79185	0.0947446	1	1
9898	uc008bef.1|uc008beg.1	Ergic1	67458	39.4148	36.5278	50.6109	46.6632	2.78907	0.0949094	1	1
1054	uc007dgc.1	AK013293	N/A	1.40685	1.07095	0.467799	0.492579	2.77259	0.095891	1	1
21616	uc009gfm.1	Etv2	14008	0.431168	0.294428	1.31233	1.31443	2.77259	0.095891	1	1
23873	uc009lxe.1|uc009lxf.1	AK034302	N/A	1.27579	1.16665	0.311319	0.468258	2.77259	0.095891	1	1
7628	uc007uyw.1|uc007uyx.1	Cldn10	N/A	0.220073	0.348524	1.08377	1.39652	2.77259	0.095891	1	1
26694	uc009tgp.1|uc009tgq.1	Mtap7d3	320923	1.15342	1.02144	0.315941	0.468257	2.77259	0.095891	1	1
1291	uc007dwz.1	Ephx1	13849	1.19199	1.16088	0.341251	0.260061	2.77259	0.095891	1	1
19626	uc009bfo.1	Cpa4	71791	1.304	0.933529	0.225708	0.456056	2.77259	0.095891	1	1
16766	uc008tka.1|uc008tkb.1|uc008tkc.1|uc008tkd.1|uc008tke.1|uc008tkf.1|uc008tkg.1|uc008tkh.1|uc008tki.1	Nfib	18028	1.10408	0.886497	0.451079	0.476814	2.77259	0.095891	1	1
26498	uc009sui.1|uc009suj.1|uc009suk.1	Zfp182	319535	1.13687	0.982618	0.302885	0.495117	2.77259	0.095891	1	1
6094	uc007qxb.1|uc007qxc.1	BC053725	N/A	1.2445	0.925781	0.303777	0.431445	2.77259	0.095891	1	1
21496	uc009fxh.1|uc009fxi.1|uc009fxj.1	1700049G17Rik	73430	0.95192	0.993172	0.484233	0.472817	2.77259	0.095891	1	1
13160	uc008kat.1	AK139461	N/A	1.16513	0.875442	0.351806	0.486076	2.77259	0.095891	1	1
5730	uc007pyu.1	Agtr1a	11607	1.09711	1.05851	0.497561	0.200322	2.77259	0.095891	1	1
6877	uc007tab.1	Gdf10	14560	1.29147	0.857568	0.412977	0.208985	2.77259	0.095891	1	1
9723	uc008arr.1|uc008ars.1	Zfp758	224598	0.829056	1.23935	0.435314	0.263995	2.77259	0.095891	1	1
13832	uc008lmd.1|uc008lme.1|uc008lmf.1|uc008lmg.1|uc008lmh.1|uc008lmi.1|uc008lmj.1|uc008lmk.1|uc008lml.1|uc008lmm.1|uc008lmn.1	Bdnf	12064	0.933384	0.865566	0.463425	0.487058	2.77259	0.095891	1	1
19060	uc008zse.1	Tmem132d	243274	0.842709	1.09355	0.362447	0.444428	2.77259	0.095891	1	1
242	uc007axk.1	Sdpr	20324	1.08246	0.904752	0.491337	0.257173	2.77259	0.095891	1	1
15359	uc008pom.1|uc008pon.1	Ctso	229445	1.00559	0.828725	0.449995	0.43714	2.77259	0.095891	1	1
18918	uc008zgs.1|uc008zgt.1	AK035112	N/A	1.1296	0.963819	0.360143	0.251568	2.77259	0.095891	1	1
13988	uc008lwz.1|uc008lxa.1	AK015969	N/A	0.75842	1.18158	0.371286	0.377576	2.77259	0.095891	1	1
16519	uc008ssz.1	1300002K09Rik	74152	0.664366	1.30639	0.394456	0.318063	2.77259	0.095891	1	1
9633	uc008anb.1	Thbs2	21826	0.858282	0.991369	0.449827	0.371253	2.77259	0.095891	1	1
19096	uc008zuq.1|uc008zur.1|uc008zus.1	Wbscr17	212996	0.357842	0.447691	0.659942	1.19028	2.77259	0.095891	1	1
21101	uc009eyu.1|uc009eyv.1	D430041B17Rik	N/A	0.871492	1.11374	0.226443	0.438713	2.77259	0.095891	1	1
6134	uc007rab.1	AK019536	N/A	1.04527	0.76161	0.454998	0.382872	2.77259	0.095891	1	1
1206	uc007drm.1	Aim2	383619	0.635594	1.20135	0.437681	0.367885	2.77259	0.095891	1	1
1600	uc007euy.1|uc007euz.1|uc007eva.1|uc007evb.1	Frk	14302	0.856269	0.924463	0.439528	0.420772	2.77259	0.095891	1	1
18165	uc008xgy.1|uc008xgz.1	Hs3st1	15476	0.931912	0.763221	0.46841	0.463752	2.77259	0.095891	1	1
9187	uc007zfm.1	Upk1b	22268	0.87971	0.981018	0.41076	0.343085	2.77259	0.095891	1	1
21708	uc009gll.1|uc009glm.1|uc009gln.1	AI987944	233168	0.757818	1.20002	0.367722	0.279083	2.77259	0.095891	1	1
11896	uc008gio.1	Pygm	19309	0.835387	0.97519	0.428175	0.359447	2.77259	0.095891	1	1
2928	uc007iij.1|uc007iik.1	Stc2	20856	0.453433	0.473993	0.752628	0.917239	2.77259	0.095891	1	1
23229	uc009kec.1	Foxi2	270004	0.926378	0.791274	0.360127	0.471083	2.77259	0.095891	1	1
16946	uc008tty.1	mKIAA1439	N/A	1.2078	0.838041	0.372664	0.125085	2.77259	0.095891	1	1
10959	uc008dtd.1|uc008dte.1	AK003841	N/A	0.530837	1.10759	0.476239	0.401597	2.77259	0.095891	1	1
150	uc007aqt.1|uc007aqu.1	1700024G10Rik	N/A	0.672176	0.957365	0.496708	0.366973	2.77259	0.095891	1	1
19267	uc009ais.1|uc009ait.1|uc009aiu.1|uc009aiv.1	D930005D10Rik	N/A	0.359086	0.244695	0.597429	1.28626	2.77259	0.095891	1	1
14808	uc008nzz.1	AK077405	N/A	1.00204	0.779766	0.457171	0.241136	2.77259	0.095891	1	1
24323	uc009ncr.1	Lrrc29	234684	1.09206	0.639665	0.466695	0.278044	2.77259	0.095891	1	1
15117	uc008oxi.1|uc008oxj.1	Ccdc39	51938	0.752732	0.794936	0.468758	0.459739	2.77259	0.095891	1	1
9177	uc007zeu.1|uc007zev.1	Popdc2	64082	0.412318	0.325975	0.584098	1.15348	2.77259	0.095891	1	1
24810	uc009okn.1	AK154190	N/A	0.542956	0.981295	0.47871	0.467532	2.77259	0.095891	1	1
2942	uc007ijk.1	Hba-a2	null	0.802039	0.725422	0.457806	0.463561	2.77259	0.095891	1	1
6154	uc007rbh.1	A530054K11Rik	212281	0.950123	0.847537	0.223961	0.403666	2.77259	0.095891	1	1
8828	uc007ydf.1|uc007ydg.1|uc007ydh.1|uc007ydi.1	Atf7ip2	75329	0.723512	0.857458	0.454476	0.37563	2.77259	0.095891	1	1
280	uc007ban.1	Plcl1	null	0.710311	0.904308	0.304071	0.491068	2.77259	0.095891	1	1
24786	uc009oiy.1	5730577I03Rik	66662	0.804942	0.809738	0.495658	0.298706	2.77259	0.095891	1	1
10549	uc008cpo.1|uc008cpp.1|uc008cpq.1	Rcan2	53901	0.726927	0.734144	0.482061	0.46151	2.77259	0.095891	1	1
20076	uc009cke.1|uc009ckf.1	Lrrtm4	243499	0.334002	0.456709	1.04659	0.558786	2.77259	0.095891	1	1
19378	uc009aqb.1	AK146146	N/A	0.634371	1.13108	0.328961	0.297772	2.77259	0.095891	1	1
20140	uc009cnx.1|uc009cny.1|uc009cnz.1|uc009coa.1	NR_002871	N/A	0.245613	0.298314	0.81475	1.03058	2.77259	0.095891	1	1
1299	uc007dxm.1	AK133142	N/A	0.690681	0.732968	0.481775	0.483641	2.77259	0.095891	1	1
12547	uc008icf.1|uc008icg.1|uc008ich.1|uc008ici.1	AK039536	N/A	0.855272	0.84201	0.292326	0.391575	2.77259	0.095891	1	1
25770	uc009qsv.1|uc009qsw.1|uc009qsx.1	Hmgcll1	208982	0.881929	0.733841	0.411657	0.339821	2.77259	0.095891	1	1
6323	uc007rno.1	AK157788	N/A	0.956979	0.604352	0.478551	0.325513	2.77259	0.095891	1	1
5649	uc007puh.1	Hist1h4d	319156	0.469739	0.336904	0.715436	0.842703	2.77259	0.095891	1	1
18100	uc008xbs.1	Nat8l	269642	0.39756	0.479238	0.674217	0.813493	2.77259	0.095891	1	1
27068	uc009ugw.1|uc009ugx.1|uc009ugy.1	Zmat1	215693	0.985583	0.827077	0.275802	0.265676	2.77259	0.095891	1	1
12537	uc008ibp.1	AK087735	N/A	0.908257	0.621453	0.445624	0.377646	2.77259	0.095891	1	1
896	uc007cub.1	Pkp1	18772	0.992069	0.591864	0.437369	0.328356	2.77259	0.095891	1	1
14942	uc008oix.1	Gata5	14464	0.267336	0.315442	0.506534	1.25565	2.77259	0.095891	1	1
13803	uc008lke.1	Depdc7	211896	0.639061	0.943921	0.359263	0.402629	2.77259	0.095891	1	1
19692	uc009bkq.1	AK015545	N/A	0.629367	0.955401	0.355781	0.402658	2.77259	0.095891	1	1
8172	uc007wie.1	K230010J24Rik	432964	0.486081	0.443357	0.662679	0.750922	2.77259	0.095891	1	1
9631	uc008amw.1|uc008amx.1|uc008amy.1|uc008ana.1	Smoc2	64074	1.08984	0.672775	0.330872	0.245071	2.77259	0.095891	1	1
25484	uc009qcf.1|uc009qcg.1|uc009qch.1	AK051202	N/A	0.714515	0.836972	0.350163	0.436693	2.77259	0.095891	1	1
18536	uc008yki.1|uc008ykj.1|uc008ykk.1	Spp1	20750	0.591908	1.12112	0.251417	0.371181	2.77259	0.095891	1	1
5850	uc007qhe.1	Rbm24	666794	0.763665	0.95016	0.431331	0.189603	2.77259	0.095891	1	1
9267	uc007zlv.1	Rpl24	68193	0.446894	0.491463	0.78328	0.612966	2.77259	0.095891	1	1
1701	uc007fcj.1	AK146861	N/A	0.973679	0.692901	0.429581	0.23838	2.77259	0.095891	1	1
1181	uc007dqc.1|uc007dqd.1	Atp1a2	98660	0.737563	0.788022	0.440022	0.349167	2.77259	0.095891	1	1
16474	uc008sqa.1	Car9	230099	0.647471	0.812102	0.394368	0.453671	2.77259	0.095891	1	1
21711	uc009glq.1|uc009glr.1	AW146154	null	0.796636	0.686636	0.47625	0.343433	2.77259	0.095891	1	1
13194	uc008kdt.1	Evx2	14029	1.0915	0.751642	0.144776	0.306012	2.77259	0.095891	1	1
19564	uc009baw.1|uc009bax.1	Wnt16	93735	0.676483	0.884783	0.332407	0.387737	2.77259	0.095891	1	1
664	uc007cdj.1|uc007cdk.1	2310007B03Rik	71874	0.387858	0.417325	0.568681	0.892183	2.77259	0.095891	1	1
5572	uc007prb.1	Hist1h2ai	319191	0.586407	0.688222	0.49876	0.487469	2.77259	0.095891	1	1
390	uc007bje.1|uc007bjf.1	Ikzf2	22779	0.760396	0.632525	0.471234	0.395031	2.77259	0.095891	1	1
23317	uc009kjk.1|uc009kjl.1|uc009kjm.1	Sigirr	24058	0.438345	0.353686	0.735841	0.718147	2.77259	0.095891	1	1
17089	uc008ueb.1	OTTMUSG00000008561	N/A	0.460357	0.473947	0.584362	0.720622	2.77259	0.095891	1	1
5792	uc007qcn.1|uc007qco.1|uc007qcp.1|uc007qcq.1	F13a1	74145	0.775123	0.643884	0.447788	0.369705	2.77259	0.095891	1	1
16181	uc008rxs.1|uc008rxt.1|uc008rxu.1	Tox	252838	0.923022	0.775335	0.356335	0.181596	2.77259	0.095891	1	1
16463	uc008spe.1	AK043958	N/A	0.852916	0.6244	0.340224	0.41736	2.77259	0.095891	1	1
24909	uc009osf.1|uc009osg.1|uc009osh.1|uc009osi.1|uc009osj.1|uc009osl.1	Kirrel3	67703	0.72318	0.582805	0.485889	0.442927	2.77259	0.095891	1	1
19248	uc009ahi.1	A930017N06Rik	N/A	0.186762	0.321406	0.770413	0.954469	2.77259	0.095891	1	1
23627	uc009lew.1	Zmat4	320158	0.603834	0.740885	0.423396	0.459495	2.77259	0.095891	1	1
4908	uc007nxi.1	AK044480	N/A	0.432626	0.487592	0.613017	0.690312	2.77259	0.095891	1	1
11927	uc008gkx.1	AK018996	N/A	0.650735	0.741979	0.39031	0.439546	2.77259	0.095891	1	1
12964	uc008jld.1|uc008jle.1|uc008jlf.1|uc008jlg.1	Lhx6	16874	0.433847	0.45777	0.574598	0.751045	2.77259	0.095891	1	1
6402	uc007rug.1|uc007ruh.1	AK043130	N/A	0.861922	0.508005	0.438857	0.401008	2.77259	0.095891	1	1
482	uc007bqe.1	Sgpp2	433323	0.399868	0.39323	0.741097	0.67531	2.77259	0.095891	1	1
25773	uc009qtb.1|uc009qtc.1	C530008M07Rik	N/A	0.802894	0.657204	0.288455	0.458764	2.77259	0.095891	1	1
2956	uc007ikm.1	Gabrp	216643	0.984908	0.913938	0.141222	0.159566	2.77259	0.095891	1	1
7600	uc007uww.1|uc007uwx.1|uc007uwy.1	Ednrb	13618	0.759225	0.624012	0.387877	0.427905	2.77259	0.095891	1	1
8884	uc007yhn.1|uc007yho.1	Efcab1	66793	0.755037	0.829501	0.341105	0.267161	2.77259	0.095891	1	1
11040	uc008dzs.1|uc008dzt.1|uc008dzu.1|uc008dzv.1|uc008dzw.1|uc008dzx.1|uc008dzy.1|uc008dzz.1|uc008eaa.1	Mpp7	75739	0.698346	0.636993	0.386113	0.469966	2.77259	0.095891	1	1
9531	uc008afk.1|uc008afl.1|uc008afm.1|uc008afn.1|uc008afo.1|uc008afp.1|uc008afr.1|uc008afs.1|uc008aft.1|uc008afu.1|uc008afv.1|uc008afw.1	Synj2	20975	0.6947	0.626994	0.430989	0.435453	2.77259	0.095891	1	1
2898	uc007ifx.1|uc007ify.1	AK019630	N/A	0.758807	1.1286	0.153823	0.145976	2.77259	0.095891	1	1
14822	uc008oau.1|uc008oav.1|uc008oaw.1|uc008oax.1|uc008oay.1|uc008oaz.1|uc008oba.1	Nfatc2	18019	0.664611	1.04436	0.257041	0.207741	2.77259	0.095891	1	1
26508	uc009suw.1|uc009sux.1|uc009suy.1	Wdr44	72404	0.661171	0.784357	0.405069	0.322929	2.77259	0.095891	1	1
3405	uc007jrm.1|uc007jrn.1|uc007jro.1|uc007jrp.1	Zbtb4	75580	0.674377	0.653752	0.361133	0.482766	2.77259	0.095891	1	1
14838	uc008ocg.1	Dok5	76829	0.350028	0.436703	0.683742	0.683098	2.77259	0.095891	1	1
2400	uc007gvz.2	Plxnc1	54712	0.65124	0.677526	0.443761	0.377158	2.77259	0.095891	1	1
17823	uc008wer.1	AK035229	N/A	0.460301	0.39195	0.649606	0.643934	2.77259	0.095891	1	1
353	uc007bgd.1|uc007bge.1|uc007bgf.1|uc007bgg.1|uc007bgh.1	Adam23	23792	0.73306	0.703519	0.385516	0.319802	2.77259	0.095891	1	1
14536	uc008nfh.1	Nrsn2	228777	0.924685	0.539896	0.438095	0.230565	2.77259	0.095891	1	1
8051	uc007wci.1	Gpr20	239530	0.63708	0.575021	0.435749	0.476796	2.77259	0.095891	1	1
5636	uc007ptu.1	Btn2a2	238555	0.672875	0.650726	0.363647	0.436652	2.77259	0.095891	1	1
4839	uc007nrx.1	Klhdc1	271005	0.526512	0.692564	0.482159	0.421585	2.77259	0.095891	1	1
15274	uc008pit.1	mKIAA1635	N/A	0.591903	0.63616	0.445025	0.439382	2.77259	0.095891	1	1
9025	uc007ytn.1	B630019A10Rik	100043541	0.605162	0.660645	0.483969	0.360932	2.77259	0.095891	1	1
5333	uc007ozu.1	AK140072	N/A	0.660309	0.720739	0.259055	0.468827	2.77259	0.095891	1	1
25129	uc009pem.1|uc009pen.1	Tmem25	71687	0.578068	0.600219	0.43137	0.496498	2.77259	0.095891	1	1
3964	uc007lfx.1	AK141527	N/A	0.759163	0.642296	0.423893	0.277771	2.77259	0.095891	1	1
21085	uc009exy.1	Syt5	53420	0.518095	0.759219	0.334477	0.485073	2.77259	0.095891	1	1
13964	uc008luf.1	Itpka	228550	0.642798	0.735376	0.285365	0.431744	2.77259	0.095891	1	1
15846	uc008qxu.1	Gstm6	14867	0.669956	0.701275	0.355885	0.366464	2.77259	0.095891	1	1
9528	uc008aff.1|uc008afg.1	Zdhhc14	224454	0.387515	0.394452	0.612458	0.69677	2.77259	0.095891	1	1
23385	uc009kpb.1	Kcnq1	16535	0.443972	0.335424	0.543301	0.76783	2.77259	0.095891	1	1
25938	uc009rfn.1|uc009rfo.1	Ephb1	270190	0.730531	0.615857	0.43362	0.304454	2.77259	0.095891	1	1
10679	uc008dag.1	BC011426	224893	0.753221	0.548196	0.402825	0.378969	2.77259	0.095891	1	1
9368	uc007zsd.1|uc007zse.1|uc007zsf.1|uc007zsg.1|uc007zsh.1|uc007zsi.1|uc007zsj.1|uc007zsk.1	AK051166	N/A	1.07155	0.638852	0.19189	0.170265	2.77259	0.095891	1	1
21642	uc009ght.1|uc009ghu.1|uc009ghv.1|uc009ghw.1|uc009ghx.1|uc009ghy.1	Fxyd1	56188	0.652842	0.797825	0.233182	0.386271	2.77259	0.095891	1	1
8331	uc007wtu.1|uc007wtv.1|uc007wtw.1	Dmc1	13404	0.546177	0.673323	0.463356	0.378437	2.77259	0.095891	1	1
7270	uc007tzc.1	1110028A07Rik	N/A	0.996511	0.563679	0.115001	0.383845	2.77259	0.095891	1	1
3021	uc007ioy.1|uc007ioz.1	Sgcd	24052	0.734334	0.685019	0.248964	0.388585	2.77259	0.095891	1	1
9539	uc008agl.1|uc008agm.1	Dynlt1	N/A	0.644353	0.763462	0.321992	0.32604	2.77259	0.095891	1	1
15397	uc008prd.1	AK080030	N/A	0.635191	0.833677	0.317686	0.268328	2.77259	0.095891	1	1
13984	uc008lwq.1	Stard9	668880	0.63887	0.767326	0.321405	0.326099	2.77259	0.095891	1	1
25461	uc009qal.1	Itga11	319480	0.911841	0.618184	0.355406	0.159081	2.77259	0.095891	1	1
21113	uc009ezo.1	AK080857	N/A	0.576409	0.727601	0.351043	0.374544	2.77259	0.095891	1	1
16122	uc008rtb.1|uc008rtc.1|uc008rtd.1	Nexn	68810	0.822436	0.599635	0.156167	0.451007	2.77259	0.095891	1	1
25993	uc009rjw.1|uc009rjx.1|uc009rjy.1|uc009rjz.1|uc009rka.1	Parp3	235587	0.493697	0.396404	0.583545	0.551009	2.77259	0.095891	1	1
15713	uc008qou.1	AK145276	N/A	0.489159	0.493658	0.500188	0.541139	2.77259	0.095891	1	1
22588	uc009ims.1|uc009imt.1	P4ha3	320452	0.733831	0.685283	0.181208	0.420669	2.77259	0.095891	1	1
5579	uc007pri.1	Hist1h1b	56702	0.195769	0.46111	0.708479	0.650673	2.77259	0.095891	1	1
3417	uc007jse.1|uc007jsf.1|uc007jsg.1|uc007jsh.1|uc007jsi.1	mKIAA0050	N/A	0.317463	0.435331	0.630063	0.632021	2.77259	0.095891	1	1
3246	uc007jeq.1	AK005722	N/A	0.529513	0.848165	0.187218	0.441152	2.77259	0.095891	1	1
7682	uc007vcr.1	Card6	239319	0.500415	0.696016	0.466915	0.340787	2.77259	0.095891	1	1
13188	uc008kcy.1	Chrna1	11435	0.849162	0.547199	0.364952	0.232239	2.77259	0.095891	1	1
16100	uc008rri.1|uc008rrj.1	Spata1	70951	0.575972	0.655877	0.424003	0.337059	2.77259	0.095891	1	1
25885	uc009rbh.1|uc009rbi.1|uc009rbj.1	Trpc1	22063	0.576309	0.549789	0.461787	0.400422	2.77259	0.095891	1	1
11138	uc008eil.1	AK041287	N/A	0.397321	0.419978	0.63088	0.532861	2.77259	0.095891	1	1
23377	uc009koi.1	Th	21823	0.437988	0.405122	0.54651	0.585954	2.77259	0.095891	1	1
13799	uc008ljw.1	AK015665	N/A	0.879784	0.529568	0.267755	0.297162	2.77259	0.095891	1	1
875	uc007csq.1	Lgr6	329252	0.480904	0.30948	0.514197	0.667463	2.77259	0.095891	1	1
23710	uc009lkw.1|uc009lkx.1	Ppp1r3b	244416	0.467921	0.45365	0.54276	0.507161	2.77259	0.095891	1	1
23430	uc009krv.1	C330021F23Rik	546049	0.393158	0.127774	0.753713	0.694117	2.77259	0.095891	1	1
15647	uc008qjz.1|uc008qka.1	Ctss	13040	0.594965	0.538758	0.436076	0.396998	2.77259	0.095891	1	1
4036	uc007ljz.1	Krtap17-1	77914	0.513699	0.810553	0.409823	0.231887	2.77259	0.095891	1	1
18863	uc008zcu.1	Oasl2	23962	0.8265	0.58781	0.328232	0.222504	2.77259	0.095891	1	1
11631	uc008fng.1|uc008fnh.1	D18Ertd653e	52662	0.536607	0.542114	0.488435	0.395089	2.77259	0.095891	1	1
9560	uc008ahw.1	AK037830	N/A	0.621499	0.56961	0.467342	0.303257	2.77259	0.095891	1	1
3358	uc007jnw.1	Ccdc42	276920	0.331974	0.263818	0.591552	0.77345	2.77259	0.095891	1	1
16243	uc008sdd.1	DQ722851	N/A	0.549508	0.619325	0.429571	0.361809	2.77259	0.095891	1	1
1457	uc007elg.1|uc007elh.1|uc007eli.1|uc007elj.1	Hivep2	15273	0.637282	0.532504	0.378783	0.410947	2.77259	0.095891	1	1
3234	uc007jdq.1	Wnt9a	216795	0.586862	0.679305	0.29669	0.393915	2.77259	0.095891	1	1
16792	uc008tmx.1|uc008tmy.1	Ptplad2	66775	0.688345	0.561216	0.45417	0.25293	2.77259	0.095891	1	1
16982	uc008twn.1|uc008two.1|uc008twp.1|uc008twq.1|uc008twr.1|uc008tws.1|uc008twt.1|uc008twv.1	Sgip1	73094	0.523737	0.529407	0.480397	0.41705	2.77259	0.095891	1	1
9652	uc008aor.1|uc008aos.1	Prdm9	213389	0.626068	0.537674	0.464081	0.321795	2.77259	0.095891	1	1
19684	uc009bjy.1	AK137583	N/A	0.525085	0.518204	0.492228	0.411147	2.77259	0.095891	1	1
12653	uc008ilk.1	AK045818	N/A	0.472468	0.439057	0.509734	0.522017	2.77259	0.095891	1	1
3076	uc007isr.1	9630041N07Rik	N/A	0.672623	0.551883	0.426132	0.289726	2.77259	0.095891	1	1
19687	uc009bkd.1	BC099561	N/A	0.610924	0.556597	0.418053	0.353101	2.77259	0.095891	1	1
1021	uc007ddl.1|uc007ddm.1|uc007ddn.1|uc007ddo.1	Sec16b	89867	0.684216	0.598707	0.320265	0.327481	2.77259	0.095891	1	1
15391	uc008pqu.1|uc008pqv.1|uc008pqw.1	9930021J17Rik	N/A	0.503466	0.609166	0.477179	0.337918	2.77259	0.095891	1	1
9900	uc008bej.1|uc008bek.1|uc008bel.1	A930001N09Rik	77128	0.648558	0.564833	0.364877	0.345662	2.77259	0.095891	1	1
19043	uc008zqt.1	3110032G18Rik	N/A	0.551005	0.743652	0.251587	0.37026	2.77259	0.095891	1	1
19302	uc009ald.1	4930526H21Rik	N/A	0.563835	0.766304	0.258931	0.327253	2.77259	0.095891	1	1
22924	uc009jga.1|uc009jgb.1	AK005898	N/A	0.690655	0.727333	0.212337	0.285702	2.77259	0.095891	1	1
21026	uc009etb.1|uc009etc.1	Mlstd1	N/A	0.628146	0.776131	0.301889	0.209109	2.77259	0.095891	1	1
12234	uc008hfl.1|uc008hfm.1|uc008hfn.1	Papss2	23972	0.639042	0.68405	0.332811	0.257112	2.77259	0.095891	1	1
2855	uc007ich.1|uc007ici.1	AK019730	N/A	0.52177	0.599073	0.363123	0.428791	2.77259	0.095891	1	1
7378	uc007ugn.1	AK200207	N/A	0.710281	0.509425	0.25757	0.432992	2.77259	0.095891	1	1
7816	uc007vnl.1	Rrm2b	382985	0.584536	0.589115	0.330883	0.404432	2.77259	0.095891	1	1
15460	uc008pwp.1|uc008pww.1	AK078122	N/A	0.52621	0.52655	0.370145	0.473828	2.77259	0.095891	1	1
13955	uc008lts.1	Chac1	69065	0.283278	0.254346	0.547496	0.810693	2.77259	0.095891	1	1
4096	uc007loh.1|uc007loi.1	Cntd1	68107	0.525334	0.604046	0.484498	0.281067	2.77259	0.095891	1	1
7727	uc007vgu.1|uc007vgv.1	C1qtnf3	81799	0.76634	0.645533	0.346787	0.134144	2.77259	0.095891	1	1
23081	uc009jsr.1	Tbx6	21389	0.603978	0.536828	0.391666	0.352245	2.77259	0.095891	1	1
6854	uc007syj.1|uc007syk.1|uc007syl.1|uc007sym.1	Ncoa4	27057	0.637517	0.560745	0.342773	0.338263	2.77259	0.095891	1	1
20219	uc009cto.1|uc009ctp.1	Prokr1	58182	0.506692	0.556728	0.440229	0.370329	2.77259	0.095891	1	1
1643	uc007eyj.1	AK006037	N/A	0.645846	0.516916	0.261358	0.439359	2.77259	0.095891	1	1
12230	uc008hew.1|uc008hex.1|uc008hey.1|uc008hez.1|uc008hfa.1|uc008hfb.1	Asah2	54447	0.512059	0.550988	0.401188	0.39688	2.77259	0.095891	1	1
16774	uc008tlb.1|uc008tlc.1|uc008tld.1|uc008tle.1|uc008tlf.1	4930473A06Rik	320226	0.583569	0.545723	0.305645	0.415371	2.77259	0.095891	1	1
15343	uc008pnd.1|uc008pne.1	Serpini1	20713	0.626976	0.641628	0.335382	0.235108	2.77259	0.095891	1	1
1016	uc007ddc.1|uc007ddd.1	Angptl1	72713	0.545216	0.73143	0.25932	0.293127	2.77259	0.095891	1	1
3575	uc007kdv.1	AK008813	N/A	0.551573	0.638684	0.440039	0.192533	2.77259	0.095891	1	1
27048	uc009ufe.1|uc009uff.1|uc009ufg.1|uc009ufh.1	Sytl4	27359	0.529877	0.529217	0.3897	0.360667	2.77259	0.095891	1	1
20843	uc009eft.1	Clec1a	243653	0.544853	0.75249	0.201568	0.309852	2.77259	0.095891	1	1
5780	uc007qbw.1	AK012214	N/A	0.580724	0.64481	0.390845	0.192303	2.77259	0.095891	1	1
23379	uc009kok.1	AK039657	N/A	0.547508	0.707105	0.105701	0.44684	2.77259	0.095891	1	1
2174	uc007gji.1	AK136722	N/A	0.653426	0.52315	0.295401	0.334304	2.77259	0.095891	1	1
14816	uc008oan.1	AK027991	N/A	0.564104	0.636839	0.386014	0.218415	2.77259	0.095891	1	1
23696	uc009lka.1|uc009lkb.1|uc009lkc.1	Tex15	104271	0.783061	0.629106	0.104146	0.276437	2.77259	0.095891	1	1
18487	uc008ygi.1|uc008ygj.1	Prkg2	19092	0.351555	0.293771	0.515062	0.630845	2.77259	0.095891	1	1
13085	uc008jtw.1	AK166079	N/A	0.533295	0.628026	0.213766	0.411688	2.77259	0.095891	1	1
24397	uc009nie.1|uc009nif.1|uc009nig.1	AK083706	N/A	0.584402	0.657127	0.249801	0.292879	2.77259	0.095891	1	1
3764	uc007krk.1	AK085477	N/A	0.609718	0.638243	0.083048	0.442761	2.77259	0.095891	1	1
26959	uc009tzi.1	Nap1l2	17954	0.553634	0.624324	0.378674	0.212884	2.77259	0.095891	1	1
20124	uc009cmx.1|uc009cmy.1	1700003E16Rik	71837	0.542399	0.565439	0.336717	0.323961	2.77259	0.095891	1	1
3121	uc007iwa.1	Gdf9	14566	0.342408	0.360772	0.54545	0.510073	2.77259	0.095891	1	1
9708	uc008aqs.1|uc008aqt.1	Zfp677	210503	0.60075	0.562144	0.231031	0.357693	2.77259	0.095891	1	1
11149	uc008ejg.1	AK043919	N/A	0.515705	0.545138	0.228569	0.461086	2.77259	0.095891	1	1
4886	uc007nvv.1|uc007nvw.1|uc007nvx.1	Six6os1	N/A	0.537653	0.681486	0.326431	0.200811	2.77259	0.095891	1	1
7371	uc007uga.1|uc007ugb.1|uc007ugc.1|uc007ugg.1|uc007ugh.1|uc007ugi.1	AF380425	N/A	0.648386	0.558783	0.337423	0.200017	2.77259	0.095891	1	1
11759	uc008fxw.1	Aldh3b2	621603	0.566718	0.523371	0.408253	0.242643	2.77259	0.095891	1	1
631	uc007cbv.1	AK017177	N/A	0.669717	0.503381	0.188079	0.375946	2.77259	0.095891	1	1
8975	uc007ypk.1	Map6d1	208158	0.258129	0.376036	0.569453	0.532173	2.77259	0.095891	1	1
17712	uc008vvk.1|uc008vvl.1|uc008vvm.1	Casz1	69743	0.551285	0.530256	0.385355	0.265277	2.77259	0.095891	1	1
16148	uc008rvb.1|uc008rvc.1	Negr1	320840	0.579599	0.533478	0.314174	0.294086	2.77259	0.095891	1	1
7687	uc007vcy.1|uc007vcz.1	Ptger4	19219	0.5469	0.720173	0.23687	0.214826	2.77259	0.095891	1	1
18178	uc008xid.1	Fgfbp1	14181	0.503268	0.531991	0.447425	0.227189	2.77259	0.095891	1	1
119	uc007aoc.1|uc007aod.1|uc007aoe.1	B230209C24Rik	N/A	0.242421	0.364811	0.573243	0.518185	2.77259	0.095891	1	1
8127	uc007wfn.1|uc007wfo.1	Arc	11838	0.233378	0.335749	0.559057	0.568238	2.77259	0.095891	1	1
4593	uc007mzl.1	Gdf7	238057	0.696454	0.660211	0.205505	0.126123	2.77259	0.095891	1	1
5999	uc007qqb.1|uc007qqc.1	Fgfr4	14186	0.595713	0.586431	0.239738	0.264996	2.77259	0.095891	1	1
21972	uc009hed.1|uc009hee.1	Gabrb3	14402	0.581693	0.755867	0.181988	0.153416	2.77259	0.095891	1	1
23064	uc009jrf.1	Atp2a1	11937	0.571941	0.780804	0.081054	0.235645	2.77259	0.095891	1	1
13807	uc008lkj.1|uc008lkk.1	Ccdc73	211936	0.612358	0.590238	0.258387	0.193444	2.77259	0.095891	1	1
5025	uc007ohd.1	Batf	53314	0.503154	0.680971	0.169634	0.290812	2.77259	0.095891	1	1
9659	uc008apc.1	AK164331	N/A	0.612467	0.761748	0.100598	0.169112	2.77259	0.095891	1	1
8319	uc007wsu.1|uc007wsv.1|uc007wsw.1	Sox10	20665	0.84397	0.704494	0.056706	0.032392	2.77259	0.095891	1	1
16974	uc008tvw.1|uc008tvx.1|uc008tvy.1|uc008tvz.1|uc008twa.1|uc008twb.1	Lepr	16847	0.815361	0.631672	0.092744	0.097487	2.77259	0.095891	1	1
19340	uc009ani.1	Gpr12	14738	0.079593	0.125588	0.562854	0.86743	2.77259	0.095891	1	1
4625	uc007nbn.1	AW125753	N/A	0.595082	0.598657	0.199539	0.232459	2.77259	0.095891	1	1
24032	uc009mix.1	AK083190	N/A	0.672606	0.57174	0.206571	0.173374	2.77259	0.095891	1	1
26009	uc009rlg.1	6430571L13Rik	235599	0.406077	0.121316	0.520486	0.574636	2.77259	0.095891	1	1
26625	uc009tbv.1	Xpnpep2	170745	0.640284	0.518843	0.263631	0.197939	2.77259	0.095891	1	1
6161	uc007rbq.1|uc007rbr.1	Zfp273	212569	0.587462	0.573018	0.268093	0.188426	2.77259	0.095891	1	1
14926	uc008ohr.1|uc008ohs.1	Cdh26	381409	0.168211	0.317255	0.581869	0.537546	2.77259	0.095891	1	1
12588	uc008ifp.1|uc008ifq.1|uc008ifr.1|uc008ifs.1	Camk1d	227541	0.508792	0.510244	0.332082	0.248213	2.77259	0.095891	1	1
6572	uc007shp.1|uc007shq.1	Nr1d2	353187	0.504954	0.511752	0.289784	0.289625	2.77259	0.095891	1	1
7603	uc007uxb.1	Pou4f1	18996	0.530126	0.666799	0.120264	0.275627	2.77259	0.095891	1	1
10410	uc008chz.1	Psors1c2	57390	0.086234	0.400422	0.53661	0.565036	2.77259	0.095891	1	1
19534	uc009ayl.1	Gm467	N/A	0.860237	0.537503	0.103821	0.065449	2.77259	0.095891	1	1
6092	uc007qwv.1|uc007qww.1|uc007qwx.1	8430426H19Rik	71508	0.663584	0.559322	0.205878	0.100152	2.77259	0.095891	1	1
9667	uc008apr.1|uc008aps.1	Has1	15116	0.548895	0.604184	0.184576	0.174784	2.77259	0.095891	1	1
17345	uc008uvv.1	AK019743	N/A	0.572837	0.505101	0.255384	0.173233	2.77259	0.095891	1	1
2480	uc007hbi.1|uc007hbj.1|uc007hbk.1	Lgr5	14160	0.554826	0.640614	0.18645	0.115686	2.77259	0.095891	1	1
14984	uc008omu.1	AK039436	N/A	0.532638	0.547076	0.152334	0.235866	2.77259	0.095891	1	1
20870	uc009eir.1	Styk1	243659	0.519787	0.541732	0.289647	0.077876	2.77259	0.095891	1	1
18936	uc008zht.1|uc008zhu.1	Dtx1	14357	0.563423	0.525154	0.090657	0.238484	2.77259	0.095891	1	1
18355	uc008xwv.1|uc008xww.1|uc008xwx.1|uc008xwy.1|uc008xwz.1|uc008xxa.1|uc008xxb.1	Epha5	13839	0.632477	0.532024	0.133984	0.107434	2.77259	0.095891	1	1
16951	uc008tuj.1	L1td1	381591	0.594154	0.557184	0.123542	0.089503	2.77259	0.095891	1	1
12864	uc008jco.1	Ier5l	72500	24.7483	30.9284	25.5648	48.7642	2.76547	0.0963185	1	1
17369	uc008uxo.1|uc008uxp.1|uc008uxq.1|uc008uxr.1	2510006D16Rik	76799	49.1058	52.2801	54.1538	71.7268	2.7589	0.0967149	1	1
23342	uc009klk.1|uc009kll.1	Cd151	12476	25.9408	24.4189	31.8952	36.0302	2.75651	0.0968592	1	1
23203	uc009kcb.1	Oat	18242	48.3926	45.2211	61.5178	55.4122	2.74886	0.0973238	1	1
2937	uc007ija.1	3300001G02Rik	N/A	49.4656	43.9531	51.8951	64.9882	2.74886	0.0973238	1	1
26572	uc009syi.1	Ndufa1	54405	43.802	26.2595	43.5658	47.1328	2.74695	0.0974401	1	1
5527	uc007pok.1	Vps41	218035	22.3006	21.4676	14.1981	15.3227	2.73964	0.0978868	1	1
21030	uc009etk.1	1110033J19Rik	N/A	20.6412	18.4227	22.4038	33.3697	2.73671	0.0980665	1	1
10686	uc008dap.1	Mpnd	68047	65.1281	55.0531	66.2869	81.3483	2.73501	0.0981709	1	1
8723	uc007xvi.1|uc007xvj.1	Myg1	60315	40.2033	37.9227	44.7024	55.0353	2.72607	0.0987222	1	1
27014	uc009ucx.1|uc009ucy.1|uc009ucz.1|uc009uda.1	Rps6ka6	67071	48.749	51.1817	42.3689	35.5028	2.72607	0.0987222	1	1
8337	uc007wuf.1	Gtpbp1	14904	39.08	38.9819	47.9813	51.7544	2.72607	0.0987222	1	1
13514	uc008ktu.1|uc008ktv.1|uc008ktw.1	Ptpmt1	66461	17.9873	16.4326	22.1025	26.9523	2.7258	0.0987389	1	1
21554	uc009gbk.1|uc009gbl.1|uc009gbm.1	Spint2	20733	27.6927	21.0393	16.0569	17.5736	2.7258	0.0987389	1	1
7027	uc007thh.1	Gmfb	63985	38.1804	37.6589	34.4005	22.7603	2.72359	0.0988751	1	1
9825	uc008ayy.1	Mrps34	79044	40.2934	45.7642	36.4803	73.1145	2.71915	0.0991511	1	1
9665	uc008app.1	4930546H06Rik	N/A	8.5561	7.38945	3.44099	4.75222	2.71838	0.0991984	1	1
1001	uc007dbr.1|uc007dbs.1	Cep350	74081	7.95172	8.22212	3.20927	5.13254	2.71838	0.0991984	1	1
7328	uc007ucx.1	Gjb2	14619	11.2385	4.84392	5.22391	3.19642	2.71838	0.0991984	1	1
9494	uc008acj.1	AK160668	N/A	7.56991	8.44239	2.98903	5.00373	2.71838	0.0991984	1	1
18358	uc008xxi.1|uc008xxj.1|uc008xxk.1	AK017645	N/A	8.29328	8.20554	3.64671	3.76539	2.71838	0.0991984	1	1
6282	uc007rkq.1	Zfyve16	218441	8.8068	7.17705	3.6659	3.83586	2.71838	0.0991984	1	1
19700	uc009blj.1	Jhdm1d	338523	7.58876	7.90616	3.33277	4.63568	2.71838	0.0991984	1	1
19470	uc009aty.1|uc009atz.1|uc009aua.1	Brca2	12190	7.59563	7.72784	2.69323	5.34901	2.71838	0.0991984	1	1
1623	uc007ewt.1|uc007ewu.1|uc007ewv.1|uc007eww.1|uc007ewx.1|uc007ewy.1	mKIAA1028	N/A	8.29325	8.19866	5.16484	3.33163	2.71838	0.0991984	1	1
6569	uc007she.1|uc007shf.1|uc007shg.1|uc007shh.1|uc007shi.1|uc007shj.1	Rarb	218772	4.34324	4.48337	6.59663	9.35451	2.71838	0.0991984	1	1
7352	uc007uer.1	Tmem46	N/A	12.8303	15.1889	9.15568	8.4382	2.71633	0.0993262	1	1
20330	uc009dai.1	A130022J15Rik	101351	14.5991	13.4995	8.71043	7.79533	2.71633	0.0993262	1	1
5421	uc007pgc.1	Tmem121	69195	8.32914	8.72269	10.4371	17.8795	2.71633	0.0993262	1	1
3075	uc007isq.1	Zfp354c	30944	14.4492	13.5277	9.94455	7.3574	2.71633	0.0993262	1	1
26727	uc009tit.1|uc009tiu.1|uc009tiv.1|uc009tiw.1|uc009tix.1|uc009tiy.1	Fmr1	14265	14.0077	13.7455	9.3855	8.07852	2.71633	0.0993262	1	1
21861	uc009gwi.1	Rasip1	69903	8.01679	9.21036	10.1794	17.5687	2.71633	0.0993262	1	1
15043	uc008org.1|uc008orh.1|uc008ori.1	Ythdf3	229096	33.7552	35.0118	26.8343	24.0678	2.71022	0.0997074	1	1
9856	uc008bbk.1	Chtf18	214901	25.7886	25.1097	29.0118	39.5226	2.71022	0.0997074	1	1
3118	uc007ivu.1|uc007ivv.1|uc007ivw.1	Aff4	93736	18.6982	19.2334	12.2805	12.5955	2.70191	0.100228	1	1
9271	uc007zmd.1	Rg9mtd1	52575	18.9644	18.7229	12.6789	11.7968	2.70191	0.100228	1	1
10568	uc008crj.1	Mrpl14	68463	42.6722	35.6961	48.4591	52.6085	2.69562	0.100624	1	1
23455	uc009ktq.1|uc009ktr.1	Timm44	21856	44.2784	34.9939	45.3262	56.3086	2.69562	0.100624	1	1
5388	uc007pef.1	2010107E04Rik	70257	102.319	83.5606	146.493	72.5362	2.69187	0.100861	1	1
23432	uc009kry.1	Xab2	67439	42.7553	43.6953	48.4415	61.8883	2.69141	0.10089	1	1
17175	uc008ukh.1|uc008uki.1	Tie1	21846	9.57145	10.9792	13.4399	20.3307	2.68906	0.101039	1	1
891	uc007ctq.1	Phlda3	27280	12.2805	9.14678	13.7658	18.5422	2.68906	0.101039	1	1
10696	uc008dbg.1	D17Wsu104e	28106	51.7964	51.6518	57.4577	72.3805	2.68757	0.101134	1	1
4487	uc007mrv.1|uc007mrw.1|uc007mrx.1|uc007mry.1|uc007mrz.1|uc007msa.1	1810073N04Rik	N/A	30.4364	27.9077	34.1849	42.5228	2.68297	0.101426	1	1
17811	uc008wdt.1|uc008wdu.1|uc008wdv.1	Nadk	192185	36.2116	35.706	45.2904	47.9718	2.67999	0.101616	1	1
19244	uc009agz.1|uc009aha.1|uc009ahb.1|uc009ahc.1	Ints1	68510	31.9269	33.3397	33.9754	51.0557	2.67462	0.101959	1	1
3161	uc007izg.1|uc007izh.1|uc007izi.1	Sparc	20692	49.9678	45.6163	62.3582	57.8927	2.67218	0.102116	1	1
3782	uc007kta.1|uc007ktb.1	Cltc	67300	58.9927	60.7055	49.1694	46.7593	2.67218	0.102116	1	1
6066	uc007qvi.1	Gas1	14451	109.006	115.55	101.134	159.85	2.66911	0.102313	1	1
3272	uc007jgo.1|uc007jgp.1	Shmt1	20425	40.8553	38.8377	52.7237	49.1817	2.66586	0.102523	1	1
11661	uc008fpt.1	Acaa2	52538	28.6115	23.0136	32.8316	36.9608	2.66546	0.102548	1	1
3102	uc007ius.1	Cdkn2aipnl	52626	47.545	40.1296	61.9955	48.7633	2.66424	0.102627	1	1
24688	uc009ocz.1	Birc2	11797	12.1037	12.1224	7.07246	7.49447	2.66283	0.102718	1	1
7340	uc007udr.1|uc007uds.1|uc007udt.1|uc007udu.1	Zdhhc20	75965	12.3109	12.1743	6.86238	6.8975	2.66283	0.102718	1	1
24782	uc009oik.1|uc009oil.1|uc009oim.1|uc009oin.1|uc009oio.1	Zfp26	22688	11.671	12.4002	7.58985	6.13093	2.66283	0.102718	1	1
3775	uc007ksk.1	Med13	327987	11.7932	11.9356	6.96028	6.86167	2.66283	0.102718	1	1
4763	uc007nml.1|uc007nmm.1|uc007nmn.1	6030408C04Rik	N/A	12.0118	11.8246	7.54059	6.04158	2.66283	0.102718	1	1
10707	uc008dcf.1|uc008dcg.1|uc008dch.1|uc008dci.1	Safb2	224902	23.9044	21.701	21.2482	42.3104	2.66223	0.102757	1	1
17783	uc008wbn.1	AK205032	N/A	17.2025	17.7934	20.6045	29.3445	2.66097	0.102838	1	1
15980	uc008rid.1|uc008rie.1|uc008rif.1	Elovl6	170439	24.3025	26.13	16.9552	17.8703	2.66097	0.102838	1	1
3853	uc007kyp.1|uc007kyq.1|uc007kyr.1|uc007kys.1	Cacna1g	12291	23.6403	25.6606	16.7687	17.6816	2.66097	0.102838	1	1
71	uc007akq.1|uc007akr.1|uc007aks.1|uc007akt.1|uc007aku.1	Tcfap2b	21419	6.11908	3.75677	2.43792	2.11459	2.65657	0.103123	1	1
25143	uc009pfh.1	Scn4b	399548	1.78498	1.86417	4.5833	5.18315	2.65657	0.103123	1	1
9703	uc008aqk.1|uc008aql.1|uc008aqm.1|uc008aqn.1	Zfp160	224585	4.68685	4.55234	1.54414	2.23326	2.65657	0.103123	1	1
25919	uc009rdw.1|uc009rdx.1|uc009rdy.1|uc009rdz.1	Cep70	68121	4.6384	4.64212	1.85913	1.82962	2.65657	0.103123	1	1
32	uc007ahn.1|uc007aho.1|uc007ahp.1	Arfgef1	211673	9.9452	9.85045	4.82478	6.13273	2.65091	0.103491	1	1
2750	uc007hug.1	1700020C11Rik	67900	5.12416	5.9074	9.1912	10.825	2.65091	0.103491	1	1
12404	uc008hqk.1|uc008hql.1|uc008hqm.1|uc008hqn.1	Lzts2	226154	56.6255	58.3932	55.6381	84.6546	2.64518	0.103864	1	1
4388	uc007mjo.1	H3f3b	15081	64.0237	66.7044	78.493	28.2282	2.64204	0.10407	1	1
26622	uc009tbl.1|uc009tbm.1|uc009tbn.1|uc009tbo.1|uc009tbp.1|uc009tbq.1	Smarca1	93761	6.69959	6.36858	2.50813	2.64712	2.64071	0.104157	1	1
17285	uc008urn.1	Rspo1	192199	3.60721	2.27931	3.53515	8.6456	2.64071	0.104157	1	1
8959	uc007yoq.1|uc007yor.1	Hira	15260	32.4812	34.3795	42.0692	44.4147	2.63923	0.104254	1	1
3178	uc007jal.1|uc007jam.1|uc007jan.1|uc007jao.1	Gemin5	216766	32.6999	33.1627	42.3859	44.479	2.63923	0.104254	1	1
4783	uc007nnv.1|uc007nnw.1	Snx6	72183	52.0813	50.5627	46.8377	33.7713	2.63674	0.104418	1	1
11704	uc008ftb.1	Ctdp1	67655	20.7128	19.9259	27.4173	30.1331	2.62398	0.10526	1	1
15768	uc008qsg.1|uc008qsh.1|uc008qsi.1|uc008qsj.1|uc008qsk.1|uc008qsl.1	Csde1	229663	30.1808	26.7686	19.359	21.5475	2.62398	0.10526	1	1
26809	uc009tos.1|uc009tot.1	Ubl4	27643	29.4395	23.9772	31.4433	40.044	2.62216	0.105381	1	1
9788	uc008avv.1	Dci	13177	27.0059	26.3985	32.8339	37.6251	2.62216	0.105381	1	1
18980	uc008zlf.1	Arpc3	56378	91.1984	77.1298	104.705	94.1998	2.62165	0.105415	1	1
2763	uc007hvb.1	1110020P15Rik	N/A	64.6414	42.4048	62.2748	69.8594	2.61985	0.105534	1	1
15665	uc008qlx.1	Plekho1	67220	76.9564	80.0822	96.9155	89.6217	2.61961	0.105551	1	1
23703	uc009lkk.1|uc009lkl.1|uc009lkm.1|uc009lkn.1	Rbpms	19663	12.6705	12.936	19.9135	18.673	2.61762	0.105683	1	1
672	uc007cea.1	40788	18000	50.9031	44.3951	37.7006	35.7954	2.61622	0.105776	1	1
4423	uc007mmh.1|uc007mmi.1|uc007mmj.1	Jmjd6	107817	24.532	21.5578	27.949	35.5662	2.61388	0.105932	1	1
21824	uc009gtj.1|uc009gtk.1	Rpl13a	22121	44.5146	45.0758	51.834	60.6629	2.61152	0.10609	1	1
2146	uc007ghc.1|uc007ghd.1|uc007ghe.1	Pip5k1c	18717	33.4491	33.5519	32.782	53.733	2.60475	0.106544	1	1
2739	uc007htj.1|uc007htk.1|uc007htl.1	AK165129	N/A	24.9705	26.1235	20.9963	15.0372	2.59917	0.106919	1	1
4982	uc007odz.1	2410016O06Rik	71952	17.1247	18.7945	21.8199	28.6056	2.59917	0.106919	1	1
20131	uc009cnh.1	Bola3	78653	10.3518	8.47444	13.7101	14.7416	2.5985	0.106965	1	1
18139	uc008xez.1	Cno	117197	10.1346	7.52644	10.3837	18.9212	2.5985	0.106965	1	1
2969	uc007ilf.1	Pank3	211347	14.2904	15.0734	10.7822	6.72723	2.5985	0.106965	1	1
10726	uc008ddn.1	Alkbh7	66400	14.999	15.6366	16.1364	29.347	2.59373	0.107287	1	1
19237	uc009agk.1|uc009agl.1	3110082I17Rik	73212	15.5039	15.1264	21.3597	23.7351	2.59373	0.107287	1	1
26234	uc009sdp.1|uc009sdq.1|uc009sdr.1|uc009sds.1|uc009sdt.1	Nktr	18087	16.7648	16.7383	9.07649	13.1482	2.59148	0.10744	1	1
6834	uc007swy.1|uc007swz.1|uc007sxa.1|uc007sxb.1|uc007sxc.1	Nisch	64652	121.402	125.873	128.654	154.856	2.58024	0.108205	1	1
1141	uc007dnb.1	Sdhc	66052	89.22	82.1139	112.897	89.4877	2.57938	0.108264	1	1
24065	uc009mlk.1	Asf1b	66929	35.0563	32.9782	50.3312	38.4429	2.57117	0.108827	1	1
3816	uc007kvi.1|uc007kvj.1	Mrps23	64656	34.2259	33.7585	46.4261	42.0474	2.57117	0.108827	1	1
18892	uc008zew.1	Prkab1	19079	28.7133	31.5313	37.7039	41.8817	2.56809	0.109039	1	1
9873	uc008bcl.1	0610011F06Rik	68347	22.2259	26.341	28.1427	36.8767	2.56726	0.109097	1	1
18870	uc008zde.1	2410014A08Rik	N/A	115.846	105.54	141.691	115.16	2.55969	0.10962	1	1
19377	uc009apx.1|uc009apy.1|uc009apz.1|uc009aqa.1	Hsp110	N/A	58.5332	51.1223	70.5764	63.6198	2.55547	0.109913	1	1
6807	uc007sug.1|uc007suh.1	Wnt5a	22418	50.6375	46.298	43.3132	33.1753	2.55543	0.109916	1	1
11985	uc008gpb.1|uc008gpc.1	Fads2	56473	41.3615	42.7302	52.1654	54.4472	2.55309	0.110079	1	1
10245	uc008bvt.1|uc008bvu.1	Rrp1b	72462	26.6489	27.9077	38.37	34.9683	2.53966	0.111019	1	1
10741	uc008dej.1|uc008dek.1|uc008del.1|uc008dem.1	Trip10	106628	13.2299	14.4205	17.9476	21.6466	2.53846	0.111103	1	1
21253	uc009fhs.1	BC057627	N/A	37.3486	32.4163	40.8738	47.7972	2.53845	0.111104	1	1
5370	uc007pct.1	Cdc42bpb	217866	35.3032	34.1748	40.4204	49.0342	2.53845	0.111104	1	1
24111	uc009moz.1|uc009mpa.1	Tnpo2	212999	34.6761	33.9228	40.3311	49.2069	2.53845	0.111104	1	1
8756	uc007xxz.1|uc007xya.1	Zfp385	N/A	29.6727	32.1249	39.1589	42.4477	2.53196	0.111562	1	1
8496	uc007xfc.1|uc007xfd.1|uc007xfe.1	Trabd	67976	32.5523	29.4673	34.5328	46.2097	2.53196	0.111562	1	1
8352	uc007wvm.1	Rps19bp1	66538	32.5478	29.3232	41.1339	39.607	2.53196	0.111562	1	1
19234	uc009agg.1|uc009agh.1	1110007L15Rik	N/A	28.908	33.2047	37.8259	42.6453	2.53196	0.111562	1	1
26018	uc009rlt.1|uc009rlu.1	Hyal2	15587	50.877	51.2864	53.6374	71.6186	2.531	0.111629	1	1
25223	uc009plz.1	Ddx10	77591	12.9401	12.4568	6.42131	9.0265	2.52672	0.111933	1	1
4616	uc007nav.1|uc007naw.1	5830483C08Rik	N/A	11.5054	12.7186	7.57698	7.38502	2.52672	0.111933	1	1
24608	uc009nww.1|uc009nwx.1	Taf5l	102162	16.3889	16.4861	21.1029	24.6239	2.52649	0.111949	1	1
454	uc007bnt.1|uc007bnu.1|uc007bnv.1	BC038286	N/A	15.4895	16.9617	20.9498	24.6114	2.52649	0.111949	1	1
12913	uc008jgm.1	Fpgs	14287	15.1996	16.8978	19.6576	26.0243	2.52649	0.111949	1	1
26821	uc009tpo.1	Dkc1	245474	34.2421	31.7042	19.6041	28.6706	2.52228	0.112248	1	1
16803	uc008tnk.1	Klhl9	242521	61.2172	55.5183	53.3412	41.2642	2.5121	0.112975	1	1
23911	uc009maj.1|uc009mak.1	Crlf1	12931	60.8427	56.2411	46.507	46.8756	2.5121	0.112975	1	1
10355	uc008cdv.1|uc008cdw.1|uc008cdx.1	Rdbp	27632	48.7389	44.7193	58.1474	58.7318	2.5121	0.112975	1	1
23368	uc009knb.1|uc009knc.1|uc009knd.1|uc009kne.1|uc009knf.1|uc009kng.1|uc009knh.1	Lsp1	16985	5.05908	4.16646	8.40341	9.47466	2.50193	0.113707	1	1
14191	uc008moz.1	Jag1	16449	10.104	7.49966	4.461	4.66608	2.50193	0.113707	1	1
12215	uc008hdy.1	9930021J03Rik	240613	7.63182	9.2825	4.39742	4.8649	2.50193	0.113707	1	1
14713	uc008nth.1|uc008nti.1|uc008ntj.1|uc008ntk.1	Pkig	18769	12.2714	11.4967	16.169	18.7944	2.50078	0.11379	1	1
12912	uc008jgk.1|uc008jgl.1	Eng	13805	10.6912	12.1816	15.0399	20.2656	2.50078	0.11379	1	1
3090	uc007itr.1|uc007its.1|uc007itt.1|uc007itu.1	Clk4	12750	16.425	18.8038	10.7823	11.8682	2.50078	0.11379	1	1
10898	uc008doe.1|uc008dof.1|uc008dog.1|uc008doh.1|uc008doi.1|uc008doj.1	Birc6	12211	17.6125	16.7902	10.2588	13.1442	2.50078	0.11379	1	1
16920	uc008tsc.1|uc008tsd.1|uc008tse.1	Plaa	18786	16.6115	17.6401	12.0149	11.2661	2.50078	0.11379	1	1
17750	uc008vys.1|uc008vyt.1	Dnajc11	230935	28.6557	26.6636	35.172	38.8631	2.50033	0.113822	1	1
6350	uc007rpr.1|uc007rps.1|uc007rpt.1	Mtap1b	17755	10.463	9.42134	14.5791	15.4775	2.49056	0.114531	1	1
26741	uc009tkb.1|uc009tkc.1|uc009tkd.1	Hmgb3	15354	9.80416	8.9134	5.65185	24.2481	2.49056	0.114531	1	1
3392	uc007jql.1|uc007jqm.1|uc007jqn.1	Trp53	22059	44.3572	51.2362	61.4742	56.5111	2.48842	0.114687	1	1
25060	uc009ozv.1	AK089373	N/A	11.4924	10.4747	6.91911	5.47468	2.48592	0.114869	1	1
7048	uc007tjv.1|uc007tjw.1	Exoc5	105504	10.3403	10.5437	6.40775	6.38221	2.48592	0.114869	1	1
19318	uc009amb.1|uc009amc.1|uc009amd.1	Arpc1b	11867	6.49288	6.40358	9.89543	10.6835	2.48592	0.114869	1	1
12999	uc008jmq.1|uc008jmr.1	Rc3h2	319817	10.4915	10.5607	7.11736	5.18408	2.48592	0.114869	1	1
19080	uc008ztn.1	Chchd2	14004	6.25065	6.03566	13.8768	7.18099	2.48592	0.114869	1	1
15099	uc008ovt.1|uc008ovu.1|uc008ovv.1	Skil	20482	10.7747	10.2801	6.17443	5.86394	2.48592	0.114869	1	1
499	uc007bro.1|uc007brp.1	Irs1	16367	11.2223	9.88285	6.68555	5.22898	2.48592	0.114869	1	1
10873	uc008dmk.1	Ndc80	67052	11.1494	9.82592	5.57274	6.21454	2.48592	0.114869	1	1
15895	uc008rbj.1|uc008rbk.1	Col11a1	12814	10.8751	9.54453	6.50616	5.47028	2.48592	0.114869	1	1
12015	uc008grj.1	Ccdc86	108673	23.7677	26.2483	33.6159	32.7385	2.47885	0.115387	1	1
12869	uc008jcx.1	Asb6	72323	23.8633	25.9785	27.7092	38.8101	2.47885	0.115387	1	1
9916	uc008bfm.1	Lemd2	224640	23.2328	26.8537	28.5692	37.9755	2.47885	0.115387	1	1
14609	uc008nkg.1	Dynlrb1	67068	162.658	139.749	175.617	167.413	2.47837	0.115422	1	1
14657	uc008now.1	Rpn2	20014	130.158	127.798	161.091	133.996	2.47744	0.11549	1	1
11984	uc008gpa.1	AK192544	N/A	93.1983	97.8603	142.411	81.4438	2.4759	0.115603	1	1
8632	uc007xpm.1	Tegt	N/A	95.3745	96.3828	115.609	106.666	2.4759	0.115603	1	1
21346	uc009fnd.1|uc009fne.1	Pvrl2	19294	22.4464	21.666	27.7818	31.608	2.47134	0.115939	1	1
8602	uc007xnp.1	Arf3	11842	53.4842	52.4325	61.8316	67.215	2.46587	0.116343	1	1
3369	uc007jpa.1	Aurkb	20877	50.7235	53.7397	62.7114	65.6968	2.46587	0.116343	1	1
19027	uc008zpp.1|uc008zpq.1|uc008zpr.1|uc008zps.1|uc008zpt.1	Sbno1	243272	19.7458	21.0326	12.68	15.0137	2.46398	0.116484	1	1
5400	uc007pev.1|uc007pew.1	Siva1	30954	16.8994	11.3102	16.4806	25.052	2.46398	0.116484	1	1
18055	uc008wxk.1|uc008wxl.1	Eif2b4	13667	33.895	30.3272	39.045	44.1801	2.46267	0.116581	1	1
26214	uc009scb.1|uc009scc.1	Slc25a38	208638	17.094	15.8585	22.3603	24.6057	2.46266	0.116581	1	1
908	uc007cuw.1|uc007cux.1	Zfp281	226442	23.7594	22.6731	14.9576	18.1295	2.46266	0.116581	1	1
18253	uc008xoa.1|uc008xob.1	B3bp	N/A	24.5556	21.6171	16.0169	17.1883	2.46266	0.116581	1	1
2065	uc007gap.1|uc007gaq.1|uc007gar.1	Arid3a	13496	27.6518	28.9389	38.2309	36.7938	2.46221	0.116615	1	1
23391	uc009kpn.1|uc009kpo.1	Cars	27267	29.0522	27.5476	38.3892	36.5347	2.46221	0.116615	1	1
23145	uc009jxf.1	Bckdk	12041	30.1946	27.4184	36.4668	39.4051	2.46221	0.116615	1	1
591	uc007bzi.1	Cops8	108679	72.9328	72.6494	89.6814	84.3734	2.45314	0.11729	1	1
17425	uc008vbw.1	Ppp1r8	100336	65.0182	60.4026	77.4401	74.3644	2.45291	0.117307	1	1
12315	uc008hkw.1|uc008hkx.1|uc008hky.1	Aldh18a1	56454	44.4872	44.2074	55.7526	53.8736	2.4495	0.117562	1	1
6462	uc007ryr.1	Mrps30	59054	34.0769	37.815	43.1092	49.083	2.44511	0.117892	1	1
4531	uc007mur.1|uc007mus.1	Dus1l	68730	34.9897	36.775	42.2024	49.6299	2.44511	0.117892	1	1
10598	uc008ctw.1|uc008ctx.1	Klhdc3	71765	71.1862	76.061	83.2622	92.3019	2.43786	0.118438	1	1
8720	uc007xve.1	D15Mgi27	N/A	23.7204	27.4977	33.6411	34.3877	2.4369	0.11851	1	1
11911	uc008gjt.1|uc008gju.1	Fkbp2	14227	24.3575	26.6169	31.5546	35.5476	2.4369	0.11851	1	1
18493	uc008ygx.1|uc008ygy.1|uc008ygz.1	Hnrpdl	50926	66.4709	74.8238	65.2228	50.7701	2.43576	0.118597	1	1
23401	uc009kqc.1	Dhcr7	13360	29.0747	35.6522	42.8513	41.2373	2.42943	0.119076	1	1
9836	uc008azy.1	AK206957	N/A	30.3252	34.6896	35.768	47.7274	2.42943	0.119076	1	1
22374	uc009hxl.1	Mrpl46	67308	34.0615	31.4238	42.804	40.7156	2.42943	0.119076	1	1
5805	uc007qdq.1|uc007qdr.1|uc007qds.1|uc007qdt.1	Txndc5	105245	75.3434	83.8921	96.8588	90.5089	2.42646	0.119302	1	1
7431	uc007ukc.1|uc007ukd.1|uc007uke.1	Trim35	66854	52.999	53.573	62.6064	67.9224	2.42429	0.119468	1	1
9080	uc007yxy.1	0610012G03Rik	106264	48.783	49.187	42.6913	77.5392	2.41999	0.119796	1	1
14844	uc008ocn.1|uc008oco.1	Aurka	20878	62.8422	63.5667	84.68	67.7211	2.41777	0.119966	1	1
849	uc007cqm.1|uc007cqn.1|uc007cqo.1|uc007cqp.1|uc007cqq.1	Zc3h11a	70579	18.2244	17.7446	11.3641	13.3465	2.41626	0.120081	1	1
22555	uc009ikn.1|uc009iko.1|uc009ikp.1|uc009ikq.1|uc009ikr.1	2210018M11Rik	233545	18.6806	17.1641	10.8047	13.301	2.41626	0.120081	1	1
5959	uc007qnj.1	Ror2	26564	35.3487	38.1536	42.216	50.6703	2.4155	0.120139	1	1
26784	uc009tmr.1|uc009tms.1	Ssr4	20832	39.1587	33.6739	50.8678	42.0443	2.4155	0.120139	1	1
3629	uc007kif.1|uc007kig.1	Traf4	22032	37.4126	43.8892	45.9791	56.0303	2.41515	0.120166	1	1
18155	uc008xgg.1|uc008xgh.1|uc008xgi.1	Lyar	17089	44.029	36.8982	48.4142	53.8501	2.41515	0.120166	1	1
11970	uc008gof.1	Mta2	23942	104.101	106.177	128.484	114.538	2.4061	0.120863	1	1
4370	uc007mia.1	Mrps7	50529	53.7019	53.9871	70.4418	62.3464	2.40402	0.121024	1	1
8973	uc007yph.1	Klhl24	75785	12.9849	13.2344	8.65057	6.8118	2.40397	0.121027	1	1
3127	uc007iwl.1|uc007iwm.1|uc007iwn.1|uc007iwo.1	Kif3a	16568	13.2644	12.5712	7.18823	8.52637	2.40397	0.121027	1	1
20125	uc009cmz.1|uc009cna.1|uc009cnc.1	Dctn1	13191	45.6477	43.5637	48.8631	62.629	2.4008	0.121273	1	1
17544	uc008vkt.1	Ddost	13200	112.195	112.045	127.67	129.672	2.40033	0.121309	1	1
956	uc007cym.1|uc007cyn.1|uc007cyo.1|uc007cyp.1	Ivns1abp	117198	110.654	105.31	93.2391	91.6376	2.3989	0.12142	1	1
23100	uc009jud.1	Kif22	110033	62.2816	55.6238	71.8259	71.1636	2.39831	0.121466	1	1
2606	uc007hla.1	Prim1	19075	42.8763	41.5022	37.0657	29.4711	2.39708	0.121562	1	1
25114	uc009pdk.1|uc009pdl.1	Trappc4	60409	36.1548	29.5635	42.9102	41.6341	2.39708	0.121562	1	1
24281	uc009mzu.1|uc009mzv.1	Cdh11	12552	34.3242	35.014	31.1883	20.8942	2.39635	0.121619	1	1
21262	uc009fib.1	Slc1a5	20514	24.8637	27.1998	31.9555	36.904	2.39635	0.121619	1	1
16068	uc008rpd.1|uc008rpe.1|uc008rpf.1|uc008rpg.1	Pkn2	109333	20.655	21.241	13.4305	15.5026	2.39376	0.12182	1	1
25961	uc009rhj.1	Dnajc13	null	20.5542	21.1756	12.7233	16.1754	2.39376	0.12182	1	1
18919	uc008zgu.1|uc008zgv.1|uc008zgw.1	Tbx3	21386	20.7962	20.7729	14.8126	14.2164	2.39376	0.12182	1	1
14636	uc008nmm.1|uc008nmn.1	2010100O12Rik	N/A	12.7234	6.52095	8.033	22.6013	2.3913	0.122012	1	1
4870	uc007nup.1|uc007nuq.1	Dact1	59036	15.7846	15.0746	9.82415	9.73031	2.3913	0.122012	1	1
4479	uc007mrd.1	Chmp6	208092	30.9356	27.9836	37.4001	40.3439	2.38936	0.122164	1	1
18869	uc008zdc.1|uc008zdd.1	Unc119b	106840	28.9619	29.5534	37.0357	40.4865	2.38936	0.122164	1	1
13241	uc008khi.1|uc008khj.1	Dnajc10	66861	37.8974	38.8584	33.0532	25.7183	2.38936	0.122164	1	1
14845	uc008ocp.1|uc008ocq.1	Cstf1	67337	39.5566	41.8908	47.5257	54.6372	2.38893	0.122197	1	1
8777	uc007xzk.1	Trap1	68015	66.8268	62.3562	74.7393	79.7994	2.38362	0.122613	1	1
6838	uc007sxh.1	Bap1	104416	58.9382	59.5042	73.1508	70.8483	2.38002	0.122896	1	1
24114	uc009mpf.1|uc009mpg.1	Dhps	330817	21.6923	23.9515	30.3209	31.7731	2.37912	0.122967	1	1
410	uc007bkw.1	Igfbp2	16008	98.7166	79.8644	64.7945	86.1815	2.37862	0.123006	1	1
1674	uc007fak.1	Ascc3	77987	6.94386	7.35286	2.43823	5.10869	2.37859	0.123009	1	1
6339	uc007roz.1|uc007rpa.1|uc007rpb.1	Fcho2	218503	7.2227	6.87117	4.31146	3.41405	2.37859	0.123009	1	1
6804	uc007sts.1|uc007stt.1|uc007stu.1|uc007stv.1	D14Abb1e	null	7.29836	7.03557	3.46594	4.01778	2.37859	0.123009	1	1
9851	uc008bay.1|uc008baz.1|uc008bba.1	Sox8	20681	2.95948	4.18192	6.31489	7.97846	2.37859	0.123009	1	1
26445	uc009sql.1|uc009sqm.1	Tspan7	21912	3.80898	3.40167	7.61715	6.36105	2.37859	0.123009	1	1
12647	uc008ikz.1	Plxdc2	67448	6.91296	7.12272	4.37506	2.77086	2.37859	0.123009	1	1
1956	uc007ftc.1	Mif	17319	4.37721	2.99808	4.80583	8.77102	2.37859	0.123009	1	1
7843	uc007vpm.1	Ttc35	66736	6.87769	6.67344	3.26864	4.13077	2.37859	0.123009	1	1
5077	uc007olc.1	Flrt2	399558	7.1954	7.12098	3.04405	3.56456	2.37859	0.123009	1	1
951	uc007cxy.1|uc007cxz.1|uc007cya.1	BC003331	226499	7.26963	6.73033	2.92073	3.95623	2.37859	0.123009	1	1
4634	uc007ncg.1|uc007nch.1|uc007nci.1|uc007ncj.1	Rock2	19878	7.03728	7.29438	2.54746	3.98506	2.37859	0.123009	1	1
1860	uc007fmf.1|uc007fmg.1|uc007fmh.1|uc007fmi.1|uc007fmj.1	Arid5b	71371	7.12759	6.68727	3.90819	3.09444	2.37859	0.123009	1	1
18641	uc008yse.1	Mn1	433938	6.99989	6.73254	3.54022	3.33828	2.37859	0.123009	1	1
3321	uc007jkn.1	Hs3st3b1	54710	6.85001	6.52942	3.74064	3.44515	2.37859	0.123009	1	1
9163	uc007zdm.1|uc007zdn.1|uc007zdo.1|uc007zdp.1|uc007zdq.1|uc007zdr.1	Polq	77782	6.56999	6.55553	2.74523	4.38398	2.37859	0.123009	1	1
24859	uc009ook.1	Anln	68743	27.5454	27.2338	20.8768	19.4844	2.37836	0.123027	1	1
4116	uc007lps.1|uc007lpt.1|uc007lpu.1|uc007lpv.1|uc007lpw.1	Etv4	18612	18.614	20.7932	27.5521	27.3068	2.37836	0.123027	1	1
17243	uc008uow.1	Ppie	56031	49.697	49.5554	61.3725	62.2614	2.37642	0.123179	1	1
19076	uc008zti.1	Cct6a	12466	302.996	283.524	356.338	285.413	2.37536	0.123263	1	1
4796	uc007noq.1	Psma6	26443	159.057	142.144	195.74	143.767	2.37432	0.123345	1	1
12803	uc008ixd.1	Wdr5	140858	54.0932	55.8828	71.8335	61.7784	2.36448	0.124126	1	1
3112	uc007ivm.1	Vdac1	22333	40.1309	34.9104	51.3646	44.0579	2.3584	0.12461	1	1
19063	uc008zsh.1	Fzd10	93897	36.5148	37.592	43.3661	51.777	2.3584	0.12461	1	1
23871	uc009lxc.1	D10627	234358	4.47513	4.36366	1.34664	2.14513	2.35828	0.124619	1	1
3905	uc007lbp.1|uc007lbq.1	Hoxb8	15416	1.42326	2.24117	3.27343	4.92722	2.35828	0.124619	1	1
21713	uc009glt.1|uc009glu.1|uc009glv.1|uc009glw.1|uc009glx.1	2810426N06Rik	N/A	4.26315	4.06939	1.39861	1.66484	2.35828	0.124619	1	1
15893	uc008rbc.1|uc008rbd.1|uc008rbe.1|uc008rbf.1|uc008rbg.1|uc008rbh.1	Rnpc3	67225	3.60285	3.90031	2.40041	1.44844	2.35828	0.124619	1	1
8887	uc007yhs.1|uc007yht.1|uc007yhu.1	Prkdc	19090	3.69419	3.85823	1.2588	2.34376	2.35828	0.124619	1	1
13021	uc008jof.1|uc008jog.1|uc008joh.1	A930041I02Rik	N/A	3.91561	3.74734	1.67776	1.32763	2.35828	0.124619	1	1
21782	uc009gpp.1|uc009gpq.1	2310044H10Rik	69683	51.6995	49.1013	53.7071	70.2049	2.35522	0.124864	1	1
2560	uc007hhm.1|uc007hhn.1|uc007hho.1	Tsfm	66399	17.8339	17.1296	22.3504	26.7636	2.34426	0.125745	1	1
6191	uc007rdg.1|uc007rdh.1	Ndufs6	407785	19.0665	15.6459	24.1971	25.486	2.34426	0.125745	1	1
11969	uc008god.1|uc008goe.1	Eml3	225898	15.5637	18.5205	21.6993	26.5401	2.34426	0.125745	1	1
16283	uc008sga.1	2700059D21Rik	N/A	61.8226	59.1934	75.7183	69.6001	2.34426	0.125746	1	1
6229	uc007rgk.1|uc007rgl.1	AK129128	N/A	11.4904	10.7492	4.77665	8.36672	2.34049	0.12605	1	1
8809	uc007ybv.1|uc007ybw.1	Nagpa	27426	7.41754	6.47401	8.50494	12.8726	2.34049	0.12605	1	1
19013	uc008zoi.1|uc008zoj.1|uc008zok.1|uc008zol.1|uc008zom.1|uc008zon.1	Rsrc2	208606	12.2089	10.0067	5.77581	6.80034	2.34049	0.12605	1	1
9068	uc007ywy.1	BC022623	N/A	6.57415	5.57562	8.62709	13.153	2.34049	0.12605	1	1
23238	uc009ker.1|uc009kes.1	Ebf3	13593	10.7748	10.6775	5.95492	6.87689	2.34049	0.12605	1	1
6022	uc007qrz.1	Pcbd2	72562	14.0501	11.2189	16.8205	20.2679	2.3373	0.126308	1	1
18453	uc008yee.1|uc008yef.1	Ccng2	12452	19.2717	17.8114	14.6427	10.1001	2.3373	0.126308	1	1
4450	uc007mot.1|uc007mou.1|uc007mov.1	Usp36	72344	12.3985	12.781	15.5756	20.6096	2.3373	0.126308	1	1
20121	uc009cmr.1	Znhit4	N/A	21.945	25.273	23.2182	39.9471	2.33555	0.12645	1	1
16102	uc008rrl.1|uc008rrm.1	Bxdc5	N/A	29.7235	32.6958	25.4059	22.2683	2.33555	0.12645	1	1
19295	uc009ako.1	Pscd3	N/A	27.7988	28.4396	21.5283	19.0663	2.32892	0.12699	1	1
4468	uc007mqj.1	Eif4a3	192170	17.0026	13.0402	21.2969	21.8947	2.32746	0.127109	1	1
23036	uc009jox.1|uc009joy.1|uc009joz.1	Rbbp6	19647	21.3136	21.509	12.9433	17.3753	2.32746	0.127109	1	1
17587	uc008vnl.1	Sdhb	67680	122.776	123.275	146.972	133.547	2.32619	0.127213	1	1
17171	uc008ujv.1|uc008ujw.1|uc008ujx.1	Med8	80509	33.2704	28.3506	41.2024	37.9343	2.3207	0.127662	1	1
3462	uc007jvw.1|uc007jvx.1|uc007jvy.1	Eno3	13808	31.2661	29.5553	39.7809	39.095	2.3207	0.127662	1	1
18785	uc008yzf.1|uc008yzg.1|uc008yzh.1	Ung	22256	30.0115	30.5981	40.2437	38.7757	2.3207	0.127662	1	1
24727	uc009ofp.1|uc009ofq.1|uc009ofr.1|uc009ofs.1	Josd3	N/A	7.95663	9.74466	5.13716	5.03541	2.31787	0.127895	1	1
24663	uc009oat.1|uc009oau.1|uc009oav.1|uc009oaw.1|uc009oax.1	Alkbh8	67667	10.0847	8.32671	4.0927	6.11563	2.31787	0.127895	1	1
17908	uc008wma.1|uc008wmb.1|uc008wmc.1	Sema3a	20346	9.48609	8.57362	3.5087	6.15116	2.31787	0.127895	1	1
17789	uc008wbz.1	AK083203	N/A	7.77931	9.58226	5.92277	4.13746	2.31787	0.127895	1	1
11642	uc008foc.1|uc008fod.1|uc008foe.1|uc008fof.1	4930503L19Rik	269033	8.56021	8.8189	4.86905	5.36561	2.31787	0.127895	1	1
6800	uc007sth.1|uc007sti.1	Appl1	72993	8.56218	9.00949	4.98813	4.97771	2.31787	0.127895	1	1
19109	uc008zwl.1	Rfc2	19718	97.7744	94.2802	110.827	111.538	2.31782	0.127899	1	1
24877	uc009oqa.1|uc009oqb.1|uc009oqc.1	Thyn1	77862	51.0538	51.5428	76.2945	50.1465	2.31394	0.128218	1	1
1067	uc007dhh.1|uc007dhi.1|uc007dhj.1|uc007dhk.1	Prrx1	18933	63.8226	61.9611	64.6134	38.4522	2.31394	0.128218	1	1
19161	uc009aay.1|uc009aaz.1|uc009aba.1|uc009abb.1	Emid2	140709	52.7579	53.0672	42.7533	42.0208	2.31358	0.128249	1	1
2068	uc007gaw.1|uc007gax.1|uc007gay.1	ORF61	216157	44.3961	49.7202	45.6034	69.9462	2.309	0.128627	1	1
7798	uc007vmf.1	2310042E16Rik	N/A	6.01688	4.712	2.32489	3.45009	2.30595	0.12888	1	1
12217	uc008hea.1	ENSMUSG00000048936	N/A	5.65488	4.75824	2.23195	3.48015	2.30595	0.12888	1	1
27151	uc009umm.1|uc009umn.1|uc009umo.1|uc009ump.1|uc009umq.1	Dcx	13193	5.00378	6.09916	3.1357	1.68263	2.30595	0.12888	1	1
11973	uc008goj.1|uc008gok.1|uc008gol.1	Ahnak	66395	6.27915	4.85848	2.17928	2.58384	2.30595	0.12888	1	1
4865	uc007nud.1|uc007nue.1|uc007nuf.1	Arid4a	238247	5.67258	4.65867	2.03723	3.47754	2.30595	0.12888	1	1
10270	uc008bxy.1	1700065O13Rik	N/A	5.71316	4.89582	1.99262	3.02933	2.30595	0.12888	1	1
16507	uc008ssh.1	1110019J04Rik	N/A	2.93601	1.59617	2.68137	8.10798	2.30595	0.12888	1	1
25888	uc009rbn.1|uc009rbo.1|uc009rbp.1	Atr	null	5.56772	4.90775	1.67127	2.84318	2.30595	0.12888	1	1
16824	uc008tof.1	Mtap	66902	38.7613	37.7351	53.8392	43.0216	2.30394	0.129046	1	1
23736	uc009lmq.1|uc009lmr.1|uc009lms.1|uc009lmt.1|uc009lmu.1	Cnot7	18983	30.4678	33.761	29.714	17.5062	2.29355	0.129912	1	1
12402	uc008hqg.1	Mrpl43	94067	24.1494	23.9558	31.0255	32.7543	2.29355	0.129912	1	1
21411	uc009fqq.1|uc009fqr.1|uc009fqs.1	Rps19	20085	10.2335	7.0252	12.3847	15.0465	2.29271	0.129983	1	1
9395	uc007zuj.1|uc007zuk.1	Usp16	74112	13.8058	13.1624	6.91724	9.52673	2.29271	0.129983	1	1
15694	uc008qnh.1	Lix1l	null	9.61741	7.10666	6.76038	19.6041	2.29271	0.129983	1	1
3554	uc007kcd.1|uc007kce.1|uc007kcf.1	Pafah1b1	18472	26.1901	23.9857	18.8474	17.3591	2.28924	0.130273	1	1
5844	uc007qgw.1|uc007qgx.1	Dtnbp1	94245	33.2648	29.0981	36.0929	44.4121	2.28784	0.130391	1	1
10250	uc008bwa.1|uc008bwb.1|uc008bwc.1|uc008bwd.1|uc008bwe.1|uc008bwf.1	Brd4	57261	45.7856	48.6738	56.8023	60.0283	2.28713	0.130451	1	1
17411	uc008vbb.1	Trspap1	N/A	29.0308	25.6082	36.4399	36.461	2.28244	0.130846	1	1
9822	uc008ayo.1	Nubp2	26426	27.7379	27.2485	36.6878	35.3301	2.28244	0.130846	1	1
10592	uc008ctg.1	Srf	20807	27.078	27.9309	29.6261	42.3675	2.28244	0.130846	1	1
19154	uc008zzx.1|uc008zzy.1|uc008zzz.1	1200011O22Rik	N/A	28.913	26.3963	31.441	41.2243	2.28244	0.130846	1	1
24012	uc009mhm.1|uc009mhn.1	Arhgap10	78514	22.4999	19.5439	29.0859	28.4403	2.2815	0.130925	1	1
24293	uc009nas.1	Appbp1	N/A	29.1099	28.3787	22.8442	18.8597	2.2815	0.130925	1	1
6027	uc007qsf.1|uc007qsg.1|uc007qsh.1|uc007qsi.1	H2afy	26914	89.3653	82.2399	84.52	114.871	2.26916	0.131971	1	1
25527	uc009qfo.1|uc009qfp.1|uc009qfq.1|uc009qfr.1|uc009qfs.1	Tpm1	22003	48.4074	39.3297	57.4622	51.1597	2.26593	0.132247	1	1
7234	uc007twc.1	Mmp14	17387	52.6046	54.8389	42.5405	44.471	2.26593	0.132247	1	1
10343	uc008ccz.1|uc008cda.1	Agpat1	55979	46.2149	50.1829	55.6077	62.3443	2.26568	0.132268	1	1
24087	uc009mmt.1|uc009mmu.1	Btbd14b	N/A	15.9511	15.317	20.0073	23.9623	2.26475	0.132347	1	1
25475	uc009qbm.1	Zwilch	68014	21.7485	21.8626	18.3728	13.0575	2.26475	0.132347	1	1
676	uc007cef.1|uc007ceg.1|uc007ceh.1	Thap4	67026	15.5785	15.3299	20.928	22.8425	2.26475	0.132347	1	1
26139	uc009rvr.1|uc009rvs.1	Epm2aip1	77781	19.0142	18.8534	15.3747	11.2531	2.26337	0.132465	1	1
12399	uc008hqb.1|uc008hqc.1	6030443O07Rik	N/A	18.8087	18.9601	12.0219	14.2105	2.26337	0.132465	1	1
15663	uc008qlu.1|uc008qlv.1	Anp32e	66471	183.913	150.407	186.993	186.691	2.26109	0.132661	1	1
7858	uc007vrb.1	Eif3h	68135	69.1885	68.4139	76.8488	85.6906	2.25616	0.133083	1	1
6888	uc007tas.1	Glud1	14661	34.054	29.3893	39.1856	42.2635	2.2559	0.133106	1	1
4504	uc007mtb.1	Slc25a10	27376	32.055	31.1387	35.4329	45.7745	2.2559	0.133106	1	1
20244	uc009cva.1	Rpn1	103963	83.228	76.9412	96.6159	91.0801	2.25531	0.133157	1	1
20562	uc009drz.1	Tpi1	21991	43.3116	27.5996	44.2341	45.8887	2.24747	0.133833	1	1
14100	uc008mhf.1	Rpo1-2	N/A	28.1342	28.2701	37.0517	36.2505	2.24684	0.133888	1	1
26004	uc009rkt.1|uc009rku.1	Armet	N/A	52.2333	44.7709	73.47	45.6292	2.24463	0.134079	1	1
2953	uc007ikd.1|uc007ike.1|uc007ikf.1	Npm1	18148	25.2432	26.4366	16.4452	20.6521	2.23676	0.134763	1	1
15213	uc008pdy.1	Ndufc1	66377	25.2067	12.3398	25.0769	25.7922	2.23676	0.134763	1	1
1118	uc007dlj.1|uc007dlk.1|uc007dll.1	Nuf2	66977	24.704	26.0885	19.5648	17.1937	2.23676	0.134763	1	1
17449	uc008vdk.1|uc008vdl.1|uc008vdm.1|uc008vdn.1|uc008vdp.1	Rps6ka1	20111	21.2006	22.4987	28.5536	29.2209	2.23599	0.134831	1	1
18179	uc008xie.1|uc008xif.1|uc008xig.1|uc008xih.1|uc008xii.1|uc008xij.1|uc008xik.1|uc008xil.1|uc008xim.1	Prom1	19126	29.6616	28.0733	24.5287	18.3314	2.23599	0.134831	1	1
11220	uc008eop.1|uc008eoq.1	Hars	15115	56.0342	50.9303	66.134	64.093	2.23558	0.134866	1	1
23217	uc009kdi.1	Bccip	66165	91.2555	83.3004	106.627	95.5463	2.23297	0.135094	1	1
18160	uc008xgs.1|uc008xgt.1	Wdr1	22388	88.1466	85.5376	101.548	100.728	2.23297	0.135094	1	1
4734	uc007njp.1|uc007njq.1|uc007njr.1	Bzw2	66912	77.3118	72.8799	97.2511	79.8271	2.2319	0.135188	1	1
22923	uc009jfy.1|uc009jfz.1	Eif4g2	13690	254.326	265.003	287.621	184.225	2.2299	0.135363	1	1
6347	uc007rpn.1	Mrps27	218506	41.1973	38.9351	54.6255	45.0575	2.22682	0.135633	1	1
12437	uc008htr.1	AK204799	N/A	37.589	25.9108	33.7312	47.7047	2.22483	0.135807	1	1
21617	uc009gfn.1|uc009gfo.1|uc009gfp.1|uc009gfq.1	3100004P22Rik	N/A	50.336	48.1408	52.373	68.1184	2.22397	0.135883	1	1
15452	uc008pvs.1|uc008pvt.1	Ssr2	66256	101.852	99.4029	126.65	104.597	2.2213	0.136118	1	1
20111	uc009cly.1|uc009clz.1|uc009cma.1	Aup1	11993	36.9071	35.0866	43.1882	47.6841	2.21977	0.136254	1	1
17157	uc008uiw.1	Dmap1	66233	29.2783	27.5825	35.7666	37.7606	2.21234	0.136911	1	1
3885	uc007lan.1	Phb	18673	9.41482	5.47179	11.6609	11.4422	2.2113	0.137003	1	1
19164	uc009abf.1	Fis1	66437	106.476	95.8546	109.694	122.881	2.21107	0.137024	1	1
18991	uc008zmq.1|uc008zmr.1|uc008zms.1|uc008zmt.1|uc008zmu.1|uc008zmv.1	Fbxl10	N/A	16.2285	16.1597	18.5495	25.5612	2.20535	0.137532	1	1
16029	uc008rmg.1|uc008rmh.1|uc008rmi.1	Ppp3ca	19055	22.7258	21.9811	16.8775	15.4251	2.20535	0.137532	1	1
18873	uc008zdi.1|uc008zdj.1	Pop5	117109	17.0906	14.5769	20.6379	24.1443	2.20535	0.137532	1	1
21511	uc009fyh.1|uc009fyi.1|uc009fyj.1|uc009fyk.1	Supt5h	20924	52.2642	47.393	57.1725	64.1482	2.20368	0.137682	1	1
14241	uc008msp.1|uc008msq.1|uc008msr.1	Xrn2	24128	50.2307	50.7181	44.7672	35.6129	2.20225	0.13781	1	1
11807	uc008gbn.1|uc008gbo.1|uc008gbq.1	Dpp3	75221	45.4486	44.549	53.2057	57.7238	2.19804	0.138186	1	1
20031	uc009cgy.1|uc009cgz.1|uc009cha.1|uc009chb.1	Jmjd1a	N/A	19.3308	20.1108	15.0804	12.1999	2.194	0.138549	1	1
13885	uc008loy.1	Tmem85	68032	37.6449	35.0397	42.2048	49.7324	2.19274	0.138662	1	1
24554	uc009nsp.1|uc009nsq.1	Cyba	13057	22.7958	21.2898	29.2487	30.1973	2.19225	0.138706	1	1
6000	uc007qqd.1|uc007qqe.1|uc007qqf.1|uc007qqg.1|uc007qqh.1|uc007qqi.1|uc007qqj.1	Nsd1	18193	30.1178	29.0785	22.2553	21.5417	2.19225	0.138706	1	1
4451	uc007mow.1	Timp2	21858	29.9327	28.8172	24.5969	19.1113	2.19225	0.138706	1	1
17884	uc008wkc.1|uc008wkd.1|uc008wke.1	Dbf4	27214	29.0506	29.5534	23.7814	19.7252	2.19225	0.138706	1	1
13190	uc008kdc.1|uc008kdd.1|uc008kde.1|uc008kdf.1|uc008kdg.1|uc008kdh.1|uc008kdi.1|uc008kdj.1|uc008kdk.1|uc008kdl.1	Atf2	11909	14.2729	14.2215	10.163	8.45091	2.19137	0.138786	1	1
23893	uc009lyv.1|uc009lyw.1	2310073E15Rik	N/A	9.4872	9.23881	15.6968	12.2401	2.19137	0.138786	1	1
19520	uc009axk.1	BC020002	N/A	13.5461	13.8752	9.22415	8.72642	2.19137	0.138786	1	1
21307	uc009fkk.1|uc009fkl.1|uc009fkm.1	Dmwd	13401	52.8015	46.9729	53.387	69.41	2.18376	0.139473	1	1
17803	uc008wda.1|uc008wdb.1	2610002J02Rik	67513	29.1814	29.2314	36.4742	39.0051	2.17889	0.139916	1	1
18649	uc008ysy.1	Tfip11	54723	30.6887	27.0623	34.7741	40.4819	2.17889	0.139916	1	1
18982	uc008zli.1|uc008zlj.1	Atp2a2	11938	74.515	79.2085	100.671	79.707	2.17848	0.139952	1	1
21088	uc009eyb.1	Saps1	243819	59.777	61.1986	64.2255	81.1068	2.16836	0.140876	1	1
21264	uc009fie.1|uc009fif.1	Strn4	97387	67.3192	65.1467	76.263	80.5539	2.16534	0.141154	1	1
15793	uc008qul.1	Rhoc	11853	67.9386	63.7963	81.7947	75.4673	2.16534	0.141154	1	1
4764	uc007nmo.1|uc007nmp.1|uc007nmq.1	Scfd1	76983	7.37491	7.89291	4.02743	4.43543	2.16461	0.141221	1	1
9108	uc007yzu.1|uc007yzv.1|uc007yzw.1	Rpl35a	57808	5.48414	3.01288	8.69428	6.10928	2.16461	0.141221	1	1
18079	uc008wzs.1|uc008wzt.1|uc008wzu.1	Yes1	22612	7.12426	7.6359	3.78532	4.46041	2.16461	0.141221	1	1
24730	uc009oga.1	5830418K08Rik	319675	9.37756	5.9789	2.84357	4.80299	2.16461	0.141221	1	1
26712	uc009tia.1|uc009tib.1|uc009tic.1	Atp11c	320940	6.88342	7.69077	3.90701	4.34696	2.16461	0.141221	1	1
16162	uc008rwi.1	Tgs1	116940	7.67451	6.52919	4.05849	4.26767	2.16461	0.141221	1	1
1573	uc007etb.1	Rspo3	72780	7.14812	8.13568	4.57584	2.61728	2.16461	0.141221	1	1
4828	uc007nrc.1|uc007nrd.1|uc007nre.1|uc007nrf.1	Fancm	104806	6.93905	7.5194	3.3435	5.2366	2.16461	0.141221	1	1
3939	uc007leb.1	DQ716032	N/A	8.41576	6.80689	1.9747	5.69075	2.16461	0.141221	1	1
25227	uc009pmd.1|uc009pme.1	Atm	11920	7.7889	7.06285	2.20591	5.73309	2.16461	0.141221	1	1
22539	uc009ijm.1|uc009ijn.1	Rsf1	233532	10.3395	8.70397	4.25401	6.6333	2.15937	0.141703	1	1
96	uc007amk.1|uc007aml.1|uc007amm.1|uc007amn.1	4921533L14Rik	N/A	9.44027	9.99683	4.50051	5.75786	2.15937	0.141703	1	1
4825	uc007nqr.1|uc007nqs.1|uc007nqt.1|uc007nqu.1|uc007nqv.1	AK039995	N/A	9.13571	9.54952	4.48127	6.60961	2.15937	0.141703	1	1
3847	uc007kxv.1|uc007kxw.1|uc007kxx.1|uc007kxy.1|uc007kxz.1|uc007kya.1|uc007kyb.1|uc007kyc.1|uc007kyd.1|uc007kye.1	Spag9	70834	9.6492	8.5913	5.44993	6.00724	2.15937	0.141703	1	1
20482	uc009dnd.1|uc009dne.1|uc009dnf.1|uc009dng.1|uc009dnh.1|uc009dni.1	Jarid1a	N/A	9.5834	8.89698	4.90154	5.70947	2.15937	0.141703	1	1
16524	uc008stj.1|uc008stk.1|uc008stl.1	AU014645	N/A	69.0802	63.8966	85.593	71.5709	2.15042	0.142531	1	1
8751	uc007xxp.1|uc007xxq.1|uc007xxr.1|uc007xxs.1|uc007xxt.1	Hnrnpa1	15382	30.9542	29.4437	19.4248	25.5809	2.15021	0.142551	1	1
23991	uc009mga.1|uc009mgb.1|uc009mgc.1	Cherp	27967	52.0656	60.3685	61.3882	73.999	2.14481	0.143053	1	1
24055	uc009mkp.1|uc009mkq.1	Dnajb1	81489	39.4488	36.1943	48.9966	44.6017	2.14062	0.143444	1	1
23503	uc009kwv.1	Pcid2	234069	26.3721	26.382	37.4024	31.1847	2.1397	0.14353	1	1
18909	uc008zfz.1|uc008zga.1|uc008zgb.1	Fbxo21	231670	25.7789	26.4856	31.9483	36.0165	2.1397	0.14353	1	1
18098	uc008xbn.1|uc008xbo.1	Whsc2	24116	25.7979	26.0254	32.3613	35.7837	2.1397	0.14353	1	1
22406	uc009hzs.1|uc009hzt.1	Cib1	23991	25.5107	25.5024	31.7772	35.8365	2.1397	0.14353	1	1
18650	uc008ysz.1|uc008yta.1|uc008ytb.1	2810002G02Rik	N/A	19.3323	19.8123	22.8027	29.8797	2.13873	0.14362	1	1
26660	uc009ten.1|uc009teo.1|uc009tep.1|uc009teq.1	Phf6	70998	16.5978	16.6711	14.7237	8.42563	2.13618	0.143859	1	1
3690	uc007kmj.1	Tmem98	103743	67.7121	65.7755	80.1399	79.4207	2.1357	0.143905	1	1
24823	uc009olp.1|uc009olq.1	Tmed1	17083	44.2912	40.3285	48.7825	54.5833	2.13169	0.144282	1	1
15866	uc008qza.1|uc008qzb.1|uc008qzc.1	Sars	20226	43.9572	40.1124	53.7722	49.5168	2.13169	0.144282	1	1
9866	uc008bcd.1	Wdr24	268933	13.7363	13.8235	17.0864	22.7815	2.12878	0.144556	1	1
24115	uc009mph.1	1500041N16Rik	N/A	32.933	27.4092	31.895	45.3588	2.11494	0.145868	1	1
11834	uc008gda.1|uc008gdb.1	AI837181	107242	31.2572	29.139	36.7125	40.1053	2.11494	0.145868	1	1
10599	uc008cty.1|uc008ctz.1	Mea1	17256	54.1533	39.7046	53.4906	61.745	2.11361	0.145994	1	1
3425	uc007jtc.1|uc007jtd.1|uc007jte.1	Rai12	54351	47.6634	45.8927	59.765	54.8146	2.11361	0.145994	1	1
3447	uc007juv.1	Med11	66172	23.3223	23.3667	31.7375	29.3204	2.10975	0.146364	1	1
2625	uc007hml.1|uc007hmm.1	Ankrd52	237615	21.2969	24.5029	26.8639	34.2784	2.10975	0.146364	1	1
24346	uc009nei.1	Thap11	59016	41.626	43.0881	48.8236	55.7608	2.10917	0.146419	1	1
18886	uc008zee.1|uc008zef.1|uc008zeg.1	Gcn1l1	231659	33.5014	33.8552	35.9399	50.1833	2.10871	0.146462	1	1
12370	uc008hoi.1|uc008hoj.1	Got1	14718	26.9012	26.0749	39.3445	30.3891	2.10442	0.146874	1	1
16225	uc008sbn.1	Nbn	27354	15.2703	14.3494	8.67218	10.3496	2.09867	0.147427	1	1
25718	uc009qoh.1|uc009qoi.1|uc009qoj.1|uc009qok.1|uc009qol.1|uc009qom.1	Sltm	66660	15.1233	13.92	5.5579	13.0677	2.09867	0.147427	1	1
8851	uc007yey.1|uc007yez.1|uc007yfa.1	Zc3h7a	106205	11.5581	12.22	6.83035	8.48273	2.09576	0.147708	1	1
12953	uc008jjr.1|uc008jjs.1|uc008jjt.1|uc008jju.1|uc008jjv.1|uc008jjw.1|uc008jjx.1|uc008jjy.1	Cep110	null	13.2805	11.184	4.57578	9.94248	2.09576	0.147708	1	1
12851	uc008jbk.1	Endog	13804	8.70771	6.37075	9.03075	14.5557	2.09576	0.147708	1	1
20300	uc009cyb.1	Chchd4	72170	16.362	18.408	23.9011	23.1419	2.09547	0.147736	1	1
13752	uc008lgc.1|uc008lgd.1	Alx4	11695	16.7089	17.3839	19.4099	27.6558	2.09547	0.147736	1	1
6030	uc007qsm.1	Cxcl14	57266	31.825	15.4647	18.1785	15.6338	2.09547	0.147736	1	1
9232	uc007zja.1|uc007zjb.1|uc007zjc.1	Phldb2	208177	24.7672	21.6118	17.3467	17.3631	2.09547	0.147736	1	1
12782	uc008ivp.1|uc008ivq.1|uc008ivr.1|uc008ivs.1	Egfl7	353156	17.1589	17.1019	19.2341	27.5226	2.09547	0.147736	1	1
25827	uc009qwz.1|uc009qxa.1	Tpbg	21983	17.7684	15.7641	23.8858	22.6571	2.09547	0.147736	1	1
17364	uc008uxf.1	Marcksl1	17357	111.876	101.552	116.617	127.77	2.09528	0.147755	1	1
23482	uc009kvc.1	Col4a2	12827	58.6324	56.141	67.3027	71.0169	2.0938	0.147898	1	1
16059	uc008rog.1|uc008roh.1|uc008roi.1|uc008roj.1|uc008rok.1	Bmpr1b	12167	2.43649	3.53256	1.47333	0.951028	2.09299	0.147976	1	1
10966	uc008duc.1	Six2	20472	4.15849	2.47707	0.985864	1.24206	2.09299	0.147976	1	1
17687	uc008vtc.1	MGC67181	N/A	3.00411	2.88956	1.38645	1.46566	2.09299	0.147976	1	1
9720	uc008arm.1	4930432O21Rik	74670	3.1744	3.35266	1.18275	0.996666	2.09299	0.147976	1	1
2177	uc007gjl.1|uc007gjm.1	B230315N10Rik	237411	3.16747	2.94634	1.14967	1.37428	2.09299	0.147976	1	1
24664	uc009oay.1|uc009oaz.1|uc009oba.1|uc009obb.1	Cwf19l2	244672	3.3294	2.88081	0.815731	1.4105	2.09299	0.147976	1	1
11290	uc008euj.1|uc008euk.1	AK076652	N/A	3.50784	2.35322	1.05296	1.49641	2.09299	0.147976	1	1
19311	uc009alr.1	Nptx2	53324	1.12043	0.524083	2.31229	4.37993	2.09299	0.147976	1	1
24692	uc009odj.1	AK129341	234915	2.76501	2.68672	1.2589	1.45963	2.09299	0.147976	1	1
6151	uc007rbb.1|uc007rbc.1	Zfp748	212276	2.93577	3.10857	0.916456	1.17155	2.09299	0.147976	1	1
17006	uc008tyi.1	Pcsk9	100102	1.01657	1.10415	1.87389	4.12062	2.09299	0.147976	1	1
9289	uc007zns.1	AK194005	N/A	2.86184	3.01288	1.25386	0.924921	2.09299	0.147976	1	1
12635	uc008ikd.1|uc008ike.1	Ptpla	30963	1.40905	1.36841	1.58188	3.54228	2.09299	0.147976	1	1
11946	uc008gmn.1	AK007043	N/A	0.806731	0.943243	2.19936	3.79066	2.09299	0.147976	1	1
8885	uc007yhp.1|uc007yhq.1	Ube2v2	70620	2.53087	2.58134	1.19514	1.31471	2.09299	0.147976	1	1
9716	uc008arg.1|uc008arh.1	BC043476	N/A	2.97612	2.66097	0.98723	0.934044	2.09299	0.147976	1	1
23461	uc009ktz.1	BC003267	233987	2.67889	2.57719	0.990013	1.29504	2.09299	0.147976	1	1
11057	uc008ebj.1|uc008ebk.1	Gata6	14465	0.654188	0.757982	1.56159	3.62966	2.09299	0.147976	1	1
10883	uc008dng.1	Lbh	77889	28.2375	25.8756	22.1835	17.9107	2.09288	0.147986	1	1
24228	uc009mvv.1	Mt2	17750	25.0962	14.547	27.1613	26.662	2.09288	0.147986	1	1
10424	uc008ciw.1	Dhx16	69192	32.4602	28.6121	35.2539	43.3556	2.08435	0.148815	1	1
5771	uc007qbe.1|uc007qbf.1	BC070417	N/A	28.9897	31.5238	33.5829	43.5536	2.08435	0.148815	1	1
23365	uc009kmv.1	Ctsd	13033	61.5637	54.0692	70.4199	69.1595	2.07733	0.149501	1	1
25452	uc009pzo.1|uc009pzp.1|uc009pzq.1|uc009pzr.1|uc009pzs.1	Tle3	21887	47.5516	48.2088	53.706	63.4801	2.07379	0.149849	1	1
22413	uc009iam.1	Unc45a	101869	23.5632	23.1866	25.6589	35.9511	2.07079	0.150144	1	1
24097	uc009mnr.1|uc009mns.1|uc009mnt.1|uc009mnu.1	Farsa	66590	28.0249	26.2882	34.44	36.2331	2.07028	0.150194	1	1
6047	uc007qtr.1	BC020449	N/A	15.4731	13.6109	18.4129	22.679	2.06734	0.150484	1	1
7497	uc007upf.1|uc007upg.1|uc007uph.1	Fndc3a	319448	21.2396	19.6162	17.1122	12.184	2.06734	0.150484	1	1
615	uc007cbd.1	Twist2	13345	40.164	37.6221	36.5162	60.2518	2.06693	0.150524	1	1
21238	uc009fgp.1	Sepw1	20364	211.442	194.575	228.667	219.378	2.06641	0.150576	1	1
18868	uc008zdb.1	Acads	11409	43.6498	42.7431	51.9413	55.1765	2.06552	0.150663	1	1
23011	uc009jnb.1|uc009jnc.1|uc009jnd.1|uc009jne.1	Eef2k	13631	12.8577	11.4196	17.1989	18.2849	2.0629	0.150923	1	1
19014	uc008zoo.1	Kntc1	208628	17.8464	16.7426	12.3964	12.358	2.0629	0.150923	1	1
23030	uc009jon.1|uc009joo.1|uc009jop.1	Plk1	18817	35.3404	35.2305	43.9849	43.8199	2.05509	0.151698	1	1
15439	uc008pus.1|uc008put.1	Smg5	229512	32.5653	36.8451	40.431	48.0571	2.05509	0.151698	1	1
6009	uc007qqw.1|uc007qqx.1|uc007qqy.1|uc007qqz.1|uc007qra.1	Grk6	26385	35.1695	34.684	41.7171	45.961	2.05509	0.151698	1	1
24074	uc009mlw.1|uc009mlx.1	BC057552	N/A	47.2346	49.8169	54.2304	64.4108	2.05444	0.151763	1	1
11954	uc008gna.1	Polr2g	67710	78.7128	72.8595	99.8155	77.9593	2.05061	0.152145	1	1
1881	uc007foq.1	Cisd1	52637	20.716	19.8327	23.4954	32.4417	2.04897	0.15231	1	1
19249	uc009ahj.1|uc009ahk.1	Mad1l1	17120	22.207	19.1958	24.8736	29.6005	2.04897	0.15231	1	1
26565	uc009sxx.1|uc009sxy.1|uc009sxz.1|uc009sya.1	40792	56526	25.6585	21.6003	19.5565	14.9342	2.04455	0.152752	1	1
13757	uc008lgp.1|uc008lgq.1	Hsd17b12	56348	43.6396	44.1486	57.3159	50.9535	2.04437	0.15277	1	1
6623	uc007skm.1|uc007skn.1	Chchd1	66121	86.4488	79.4393	119.469	73.3028	2.04397	0.152811	1	1
17589	uc008vnp.1	Mfap2	17150	167.981	167.197	161.532	210.914	2.04053	0.153156	1	1
30	uc007ahg.1|uc007ahh.1|uc007ahi.1|uc007ahj.1|uc007ahk.1|uc007ahl.1	Cspp1	211660	5.9863	6.3154	3.42376	3.46654	2.03879	0.153332	1	1
27006	uc009ucm.1|uc009ucn.1	Brwd3	382236	6.39406	6.17885	2.29949	4.26926	2.03879	0.153332	1	1
25891	uc009rbv.1|uc009rbw.1|uc009rbx.1|uc009rby.1	Xrn1	24127	6.11776	5.71856	3.34598	3.45251	2.03879	0.153332	1	1
24070	uc009mlq.1	4432412L15Rik	74337	3.89511	2.24985	4.99056	7.40203	2.03879	0.153332	1	1
7880	uc007vsl.1	Has2	15117	6.49795	5.50824	3.04783	3.35643	2.03879	0.153332	1	1
25707	uc009qnc.1|uc009qnd.1|uc009qne.1|uc009qnf.1	Narg2	93697	5.62413	6.10191	3.32632	3.29536	2.03879	0.153332	1	1
6901	uc007tbm.1|uc007tbn.1|uc007tbo.1	Gcap14	72972	6.50181	5.10738	3.33151	3.37364	2.03879	0.153332	1	1
5256	uc007otr.1	Trip11	109181	6.21534	6.3425	1.57475	4.1545	2.03879	0.153332	1	1
15196	uc008pcn.1|uc008pco.1|uc008pcp.1|uc008pcq.1	Sclt1	67161	5.83219	5.8046	2.27615	3.56578	2.03879	0.153332	1	1
15398	uc008pre.1|uc008prf.1|uc008prg.1|uc008prh.1|uc008pri.1	Lrba	80877	5.79896	5.55111	3.41848	2.66316	2.03879	0.153332	1	1
789	uc007cls.1|uc007clt.1	Cxcr4	12767	5.39926	6.65787	2.67843	2.58904	2.03879	0.153332	1	1
626	uc007cbq.1	AK003315	N/A	28.1692	27.1898	42.2317	29.3429	2.03724	0.153488	1	1
12042	uc008gsx.1	Mrpl16	94063	27.9935	27.4952	39.5489	31.2454	2.03724	0.153488	1	1
[truncated: 25,190 more rows]

## Sheet: Table_S2_DAVID_FL_HL_DE
Annotation Cluster 1	Enrichment Score: 10.19522655829219
Category	Term	Count	%	PValue	Genes	List Total	Pop Hits	Pop Total	Fold Enrichment	Bonferroni	Benjamini	FDR
GOTERM_CC_FAT	GO:0031974~membrane-enclosed lumen	74	16.2637	6.38107e-15	Xpo1, Grpel1, Lmo1, Maea, E2F4, Hoxd12, Pdia6, Cnot7, Pnn, Esf1, Top1, Sfrs4, Grwd1, Lsm4, Top2B, Myc, Imp4, Top2A, Ccar1, Prpf31, Ctbp1, Ctbp2, Gsc, Exosc7, Exosc4, Mta1, Rrp9, Cdk4, Ncl, Sfrs2, Ppp1Ca, Ccnd1, C1Qbp, Dld, Med9, Tmsb4X, Ruvbl2, Psme4, Matr3, Mrpl43, Mdh2, Midn, Polr2F, Mvd, Lmnb1, Pus1, Lmnb2, Polr2I, Chek1, Timm13, Calr, Serpinh1, Ddx3X, Mrpl17, Cox6B1, Runx2, Tcf3, Olfm1, Etfb,…	298	1174	12504	2.64482	2.17693e-12	2.17693e-12	8.63754e-12
GOTERM_CC_FAT	GO:0043233~organelle lumen	71	15.6044	4.27083e-14	Xpo1, Grpel1, Lmo1, Maea, E2F4, Hoxd12, Pdia6, Cnot7, Pnn, Esf1, Top1, Sfrs4, Grwd1, Lsm4, Top2B, Myc, Imp4, Top2A, Prpf31, Ctbp1, Ctbp2, Gsc, Exosc7, Exosc4, Mta1, Rrp9, Cdk4, Ncl, Sfrs2, Ppp1Ca, Ccnd1, C1Qbp, Dld, Med9, Tmsb4X, Ruvbl2, Psme4, Matr3, Mrpl43, Mdh2, Midn, Polr2F, Mvd, Lmnb1, Pus1, Lmnb2, Polr2I, Chek1, Calr, Serpinh1, Ddx3X, Mrpl17, Runx2, Tcf3, Olfm1, Etfb, Mars, Prpf40A, Dhx9, N…	298	1136	12504	2.62248	1.47038e-11	7.3519e-12	5.83089e-11
GOTERM_CC_FAT	GO:0070013~intracellular organelle lumen	70	15.3846	1.21067e-13	Xpo1, Grpel1, Lmo1, Maea, E2F4, Hoxd12, Pdia6, Cnot7, Pnn, Esf1, Top1, Sfrs4, Grwd1, Lsm4, Top2B, Myc, Imp4, Top2A, Prpf31, Ctbp1, Ctbp2, Gsc, Exosc7, Exosc4, Mta1, Rrp9, Cdk4, Ncl, Sfrs2, Ppp1Ca, Ccnd1, C1Qbp, Dld, Med9, Ruvbl2, Psme4, Matr3, Mrpl43, Mdh2, Midn, Polr2F, Mvd, Lmnb1, Pus1, Lmnb2, Polr2I, Chek1, Calr, Serpinh1, Ddx3X, Mrpl17, Runx2, Tcf3, Olfm1, Etfb, Mars, Prpf40A, Dhx9, Ndufa9, T…	298	1133	12504	2.59239	4.16289e-11	1.38763e-11	1.65079e-10
GOTERM_CC_FAT	GO:0031981~nuclear lumen	55	12.0879	8.4318e-11	Xpo1, Lmo1, Maea, E2F4, Hoxd12, Cnot7, Pnn, Esf1, Top1, Sfrs4, Grwd1, Lsm4, Top2B, Imp4, Top2A, Myc, Prpf31, Ctbp1, Ctbp2, Gsc, Exosc7, Exosc4, Mta1, Rrp9, Cdk4, Ncl, Sfrs2, Ppp1Ca, Ccnd1, Med9, Ruvbl2, Psme4, Matr3, Midn, Polr2F, Lmnb1, Pus1, Lmnb2, Polr2I, Chek1, Ddx3X, Tcf3, Runx2, Mars, Prpf40A, Dhx9, Trim28, Tead2, Sall4, Ppig, Rrs1, Phf5A, Ddx54, Parp1, Tcf12	298	883	12504	2.61357	2.90054e-08	7.25135e-09	1.15023e-07
GOTERM_CC_FAT	GO:0005654~nucleoplasm	37	8.13187	2.63901e-07	Xpo1, Polr2F, E2F4, Pus1, Polr2I, Hoxd12, Chek1, Cnot7, Pnn, Esf1, Top1, Sfrs4, Ddx3X, Lsm4, Tcf3, Runx2, Myc, Prpf40A, Prpf31, Ctbp1, Ctbp2, Gsc, Trim28, Mta1, Tead2, Cdk4, Ncl, Sfrs2, Ppp1Ca, Ccnd1, Sall4, Ppig, Med9, Ruvbl2, Psme4, Parp1, Tcf12	298	599	12504	2.59184	9.07778e-05	1.00868e-05	0.000360003
GOTERM_CC_FAT	GO:0044451~nucleoplasm part	28	6.15385	9.18012e-05	Xpo1, Polr2F, E2F4, Pus1, Polr2I, Hoxd12, Cnot7, Pnn, Sfrs4, Ddx3X, Runx2, Myc, Tcf3, Prpf40A, Prpf31, Ctbp1, Gsc, Ctbp2, Mta1, Tead2, Cdk4, Sfrs2, Sall4, Ppig, Med9, Ruvbl2, Psme4, Tcf12	298	513	12504	2.2902	0.0310876	0.00157781	0.125159
Annotation Cluster 2	Enrichment Score: 7.295448520314835
Category	Term	Count	%	PValue	Genes	List Total	Pop Hits	Pop Total	Fold Enrichment	Bonferroni	Benjamini	FDR
GOTERM_BP_FAT	GO:0048736~appendage development	23	5.05495	1.27805e-12	Lmx1B, Fgf9, Tbx5, Tbx4, Crabp2, Hoxd12, Hoxd13, Col2A1, Gas1, Hoxd10, Hoxd11, Hoxd9, Hoxc10, Shox2, Aldh1A2, Sall4, Msx1, Hoxc11, Meox2, Bax, Cyp26B1, Pitx1, Twist1	377	119	13588	6.96619	2.35168e-09	2.35168e-09	2.17605e-09
GOTERM_BP_FAT	GO:0060173~limb development	23	5.05495	1.27805e-12	Lmx1B, Fgf9, Tbx5, Tbx4, Crabp2, Hoxd12, Hoxd13, Col2A1, Gas1, Hoxd10, Hoxd11, Hoxd9, Hoxc10, Shox2, Aldh1A2, Sall4, Msx1, Hoxc11, Meox2, Bax, Cyp26B1, Pitx1, Twist1	377	119	13588	6.96619	2.35168e-09	2.35168e-09	2.17605e-09
GOTERM_BP_FAT	GO:0035107~appendage morphogenesis	22	4.83516	5.37602e-12	Lmx1B, Fgf9, Tbx5, Tbx4, Crabp2, Hoxd12, Hoxd13, Col2A1, Gas1, Hoxd10, Hoxd11, Hoxd9, Hoxc10, Shox2, Aldh1A2, Sall4, Hoxc11, Msx1, Bax, Cyp26B1, Pitx1, Twist1	377	115	13588	6.89508	9.8919e-09	4.94595e-09	9.15312e-09
GOTERM_BP_FAT	GO:0035108~limb morphogenesis	22	4.83516	5.37602e-12	Lmx1B, Fgf9, Tbx5, Tbx4, Crabp2, Hoxd12, Hoxd13, Col2A1, Gas1, Hoxd10, Hoxd11, Hoxd9, Hoxc10, Shox2, Aldh1A2, Sall4, Hoxc11, Msx1, Bax, Cyp26B1, Pitx1, Twist1	377	115	13588	6.89508	9.8919e-09	4.94595e-09	9.15312e-09
GOTERM_BP_FAT	GO:0035113~embryonic appendage morphogenesis	19	4.17582	1.37699e-10	Lmx1B, Fgf9, Tbx5, Tbx4, Crabp2, Hoxd12, Hoxd13, Gas1, Hoxd10, Hoxd11, Hoxd9, Hoxc10, Shox2, Aldh1A2, Sall4, Hoxc11, Msx1, Cyp26B1, Twist1	377	97	13588	7.05986	2.53365e-07	8.44552e-08	2.34443e-07
GOTERM_BP_FAT	GO:0030326~embryonic limb morphogenesis	19	4.17582	1.37699e-10	Lmx1B, Fgf9, Tbx5, Tbx4, Crabp2, Hoxd12, Hoxd13, Gas1, Hoxd10, Hoxd11, Hoxd9, Hoxc10, Shox2, Aldh1A2, Sall4, Hoxc11, Msx1, Cyp26B1, Twist1	377	97	13588	7.05986	2.53365e-07	8.44552e-08	2.34443e-07
GOTERM_BP_FAT	GO:0001501~skeletal system development	31	6.81319	3.23313e-10	Fgf9, Gna11, Hoxd12, Hoxd13, Col2A1, Dlk1, Sox9, Hoxd10, Hoxd11, Tgfb2, Osr2, Hoxc9, Hoxc5, Runx2, Myc, Pitx1, Tbx15, Gsc, Tgfbr1, Myf5, Tbx4, Gas1, Shox2, Hoxd9, Hoxc10, Msx1, Hoxc11, Sp3, Hoxb9, Col1A1, Tcf15	377	285	13588	3.92041	5.94895e-07	1.48724e-07	5.50465e-07
GOTERM_BP_FAT	GO:0048598~embryonic morphogenesis	35	7.69231	3.54326e-10	Fgf9, Crabp2, Hoxd12, Hoxd13, Col2A1, Hoxd10, Hoxd11, Aldh1A2, Pfn1, Osr2, Hoxc9, Macf1, Cyp26B1, Myc, Twist1, Tcf7, Tbx15, Gsc, Lmx1B, Tbx5, Tgfbr1, Myf5, Tbx4, Gas1, Shox2, Hoxd9, Hoxc10, Msx1, Sall4, Hoxc11, Sp3, Dld, Txnrd1, Tbx18, Mab21L2	377	359	13588	3.51389	6.51959e-07	1.30392e-07	6.03267e-07
GOTERM_BP_FAT	GO:0007389~pattern specification process	28	6.15385	2.30522e-08	Irx3, Fkbp8, Hoxd12, Hoxd13, Hoxd10, Hoxd11, Ednra, Aldh1A2, Sf3B1, Hoxc9, Lhx2, Cyp26B1, Hoxc5, Sim2, Gsc, Lmx1B, Tbx5, Tgfbr1, Myf5, Gas1, Hoxd9, Hoxc10, Hoxc11, Meox2, Sfrp2, Hoxb9, Tbx18, Tcf15	377	284	13588	3.55348	4.24152e-05	6.05942e-06	3.92482e-05
GOTERM_BP_FAT	GO:0003002~regionalization	24	5.27473	2.70603e-08	Irx3, Fkbp8, Gsc, Lmx1B, Tgfbr1, Myf5, Hoxd13, Gas1, Hoxd10, Hoxd11, Hoxc10, Hoxd9, Aldh1A2, Sf3B1, Hoxc11, Hoxc9, Meox2, Sfrp2, Lhx2, Hoxc5, Cyp26B1, Hoxb9, Tbx18, Tcf15	377	214	13588	4.04214	4.97898e-05	6.22385e-06	4.60723e-05
SP_PIR_KEYWORDS	DNA binding	23	5.05495	5.04e-07	Tcf7, Gsc, Tbx5, Tbx4, Hoxd12, Hoxd13, Sox9, Ncl, Hoxd10, Hoxd11, Hoxd9, Hoxc10, Top1, Msx1, Hoxc11, Hoxc9, Meox2, Hoxc5, Hoxb9, Runx2, Tcf3, Tcf12, Top2A	443	258	17854	3.59286	0.00016681	1.39019e-05	0.000683587
SP_PIR_KEYWORDS	developmental protein	45	9.89011	1.01723e-06	Irx3, Fgf9, Nnat, Hoxd12, Hoxd13, Mdk, Slc7A5, Hoxd10, Hoxd11, Wnt2, Metrn, Hoxc9, B3Gnt5, Hoxc5, Rhob, Robo2, Olfm1, Pitx1, Twist1, Sim2, Gsc, Lmx1B, Tbx5, Myf5, Tbx4, Isl1, Fxr1, Shox2, Hoxc10, Hoxd9, Hoxc11, Msx1, Nxn, Meox2, Tbcb, Sfrp2, Gtf2Ird1, Hoxb9, Psme4, Ngfr, Id3, Dbn1, Mab21L2, Tcf12, Tcf15	443	814	17854	2.22802	0.000336648	2.59e-05	0.00137969
GOTERM_MF_FAT	GO:0003700~transcription factor activity	44	9.67033	3.58639e-06	Irx3, E2F4, Gpbp1, Hoxd12, Hoxd13, Sox9, Hoxd10, Hoxd11, Hoxc9, Lhx2, Hoxc5, Nr2F6, Tcf3, Myc, Runx2, Etv4, Pitx1, Twist1, Sim2, Tcf7, Ctbp1, Tbx15, Gsc, Lmx1B, Tbx5, Myf5, Tbx4, Trim28, Mta1, Tead2, Isl1, Mycn, Shox2, Hoxc10, Hoxd9, Hoxc11, Msx1, Meox2, Gtf2Ird1, Trps1, Sp3, Hoxb9, Phf5A, Tbx18	354	776	13288	2.12837	0.00182023	0.000364312	0.00517596
GOTERM_BP_FAT	GO:0009954~proximal/distal pattern formation	8	1.75824	3.67127e-06	Hoxc10, Hoxd9, Aldh1A2, Irx3, Hoxc11, Cyp26B1, Hoxd10, Hoxd11	377	25	13588	11.5336	0.00673239	0.000397283	0.00625044
GOTERM_BP_FAT	GO:0009952~anterior/posterior pattern formation	17	3.73626	5.20736e-06	Tgfbr1, Myf5, Hoxd13, Hoxd10, Hoxd11, Hoxd9, Hoxc10, Aldh1A2, Sf3B1, Hoxc11, Hoxc9, Meox2, Sfrp2, Hoxc5, Hoxb9, Tbx18, Tcf15	377	153	13588	4.00472	0.0095358	0.000532167	0.00886557
INTERPRO	IPR017970:Homeobox, conserved site	19	4.17582	8.43325e-06	Irx3, Gsc, Lmx1B, Hoxd12, Hoxd13, Isl1, Hoxd10, Hoxd11, Hoxd9, Hoxc10, Shox2, Msx1, Hoxc11, Hoxc9, Meox2, Lhx2, Hoxc5, Hoxb9, Pitx1	432	222	17763	3.51911	0.00692494	0.00692494	0.0129945
UP_SEQ_FEATURE	DNA-binding region:Homeobox	18	3.95604	1.07247e-05	Gsc, Lmx1B, Hoxd12, Hoxd13, Isl1, Hoxd10, Hoxd11, Hoxd9, Hoxc10, Shox2, Msx1, Hoxc11, Hoxc9, Meox2, Lhx2, Hoxc5, Hoxb9, Pitx1	444	180	16021	3.60833	0.0125649	0.00630232	0.0172988
INTERPRO	IPR012287:Homeodomain-related	20	4.3956	1.9796e-05	Irx3, Gsc, Lmx1B, Hoxd12, Hoxd13, Isl1, Hoxd10, Hoxd11, Shox2, Hoxd9, Hoxc10, Msx1, Hoxc11, Hoxc9, Meox2, Lhx2, Cenpb, Hoxc5, Hoxb9, Pitx1	432	259	17763	3.17514	0.0161798	0.00812288	0.0305006
GOTERM_MF_FAT	GO:0043565~sequence-specific DNA binding	33	7.25275	3.31371e-05	Irx3, Hoxd12, Hoxd13, Sox9, Hoxd10, Hoxd11, Pole4, Hoxc9, Drap1, Lhx2, Hoxc5, Nr2F6, Tcf3, Myc, Etv4, Pitx1, Gsc, Lmx1B, Tbx5, Myf5, Trim28, Mta1, Mcm2, Isl1, Ncl, Hoxd9, Hoxc10, Shox2, Msx1, Hoxc11, Meox2, Trps1, Hoxb9	354	556	13288	2.2279	0.016693	0.00280172	0.0478146
SMART	SM00389:HOX	19	4.17582	4.49531e-05	Irx3, Gsc, Lmx1B, Hoxd12, Hoxd13, Isl1, Hoxd10, Hoxd11, Hoxd9, Hoxc10, Shox2, Msx1, Hoxc11, Hoxc9, Meox2, Lhx2, Hoxc5, Hoxb9, Pitx1	223	254	9131	3.0629	0.00734537	0.00734537	0.0544956
INTERPRO	IPR001356:Homeobox	19	4.17582	5.13825e-05	Irx3, Gsc, Lmx1B, Hoxd12, Hoxd13, Isl1, Hoxd10, Hoxd11, Hoxd9, Hoxc10, Shox2, Msx1, Hoxc11, Hoxc9, Meox2, Lhx2, Hoxc5, Hoxb9, Pitx1	432	254	17763	3.07576	0.0414565	0.0140143	0.0791493
SP_PIR_KEYWORDS	Homeobox	19	4.17582	0.000102658	Irx3, Gsc, Lmx1B, Hoxd12, Hoxd13, Isl1, Hoxd10, Hoxd11, Hoxd9, Hoxc10, Shox2, Msx1, Hoxc11, Hoxc9, Meox2, Lhx2, Hoxc5, Hoxb9, Pitx1	443	263	17854	2.91159	0.0334107	0.00154342	0.139148
Annotation Cluster 3	Enrichment Score: 6.448920649287137
Category	Term	Count	%	PValue	Genes	List Total	Pop Hits	Pop Total	Fold Enrichment	Bonferroni	Benjamini	FDR
GOTERM_BP_FAT	GO:0001501~skeletal system development	31	6.81319	3.23313e-10	Fgf9, Gna11, Hoxd12, Hoxd13, Col2A1, Dlk1, Sox9, Hoxd10, Hoxd11, Tgfb2, Osr2, Hoxc9, Hoxc5, Runx2, Myc, Pitx1, Tbx15, Gsc, Tgfbr1, Myf5, Tbx4, Gas1, Shox2, Hoxd9, Hoxc10, Msx1, Hoxc11, Sp3, Hoxb9, Col1A1, Tcf15	377	285	13588	3.92041	5.94895e-07	1.48724e-07	5.50465e-07
GOTERM_BP_FAT	GO:0048598~embryonic morphogenesis	35	7.69231	3.54326e-10	Fgf9, Crabp2, Hoxd12, Hoxd13, Col2A1, Hoxd10, Hoxd11, Aldh1A2, Pfn1, Osr2, Hoxc9, Macf1, Cyp26B1, Myc, Twist1, Tcf7, Tbx15, Gsc, Lmx1B, Tbx5, Tgfbr1, Myf5, Tbx4, Gas1, Shox2, Hoxd9, Hoxc10, Msx1, Sall4, Hoxc11, Sp3, Dld, Txnrd1, Tbx18, Mab21L2	377	359	13588	3.51389	6.51959e-07	1.30392e-07	6.03267e-07
GOTERM_BP_FAT	GO:0048705~skeletal system morphogenesis	19	4.17582	1.82095e-08	Gsc, Tbx15, Tgfbr1, Myf5, Tbx4, Col2A1, Gas1, Sox9, Hoxd10, Hoxd11, Tgfb2, Hoxd9, Shox2, Osr2, Hoxc9, Col1A1, Myc, Runx2, Tcf15	377	130	13588	5.26774	3.35048e-05	5.58422e-06	3.1003e-05
GOTERM_BP_FAT	GO:0048706~embryonic skeletal system development	15	3.2967	5.66798e-08	Gsc, Tbx15, Fgf9, Tgfbr1, Myf5, Gas1, Dlk1, Hoxd10, Hoxd9, Shox2, Osr2, Hoxc9, Sp3, Hoxc5, Hoxb9	377	83	13588	6.51369	0.000104285	1.0429e-05	9.65017e-05
GOTERM_BP_FAT	GO:0043009~chordate embryonic development	32	7.03297	7.04385e-07	Fkbp8, Fgf9, Ints1, Dlk1, Hoxd10, Wnt2, Akt1, Ednra, Pfn1, Osr2, Fbxw8, Hoxc9, Hoxc5, Twist1, Tcf7, Tbx15, Gsc, Nasp, Tgfbr1, Myf5, Gas1, Hoxd9, Shox2, Msx1, Sall4, Meox2, Sfrp2, Psmc3, Sp3, Hoxb9, Tbx18, Tcf15	377	421	13588	2.73957	0.00129523	9.96926e-05	0.00119926
GOTERM_BP_FAT	GO:0009792~embryonic development ending in birth or egg hatching	32	7.03297	8.65857e-07	Fkbp8, Fgf9, Ints1, Dlk1, Hoxd10, Wnt2, Akt1, Ednra, Pfn1, Osr2, Fbxw8, Hoxc9, Hoxc5, Twist1, Tcf7, Tbx15, Gsc, Nasp, Tgfbr1, Myf5, Gas1, Hoxd9, Shox2, Msx1, Sall4, Meox2, Sfrp2, Psmc3, Sp3, Hoxb9, Tbx18, Tcf15	377	425	13588	2.71378	0.00159191	0.000113792	0.00147418
GOTERM_BP_FAT	GO:0048704~embryonic skeletal system morphogenesis	10	2.1978	6.20295e-05	Shox2, Hoxd9, Osr2, Tbx15, Hoxc9, Gsc, Tgfbr1, Myf5, Gas1, Hoxd10	377	64	13588	5.63163	0.107865	0.00455511	0.105558
GOTERM_BP_FAT	GO:0048568~embryonic organ development	19	4.17582	0.000132763	Tcf7, Gsc, Tbx15, Fgf9, Tgfbr1, Myf5, Col2A1, Gas1, Hoxd10, Wnt2, Hoxd9, Shox2, Akt1, Aldh1A2, Osr2, Hoxc9, Fbxw8, Sp3, Myc	377	241	13588	2.84152	0.216747	0.00900732	0.225799
GOTERM_BP_FAT	GO:0048562~embryonic organ morphogenesis	15	3.2967	0.000153474	Tcf7, Gsc, Tbx15, Fgf9, Tgfbr1, Myf5, Col2A1, Gas1, Hoxd10, Hoxd9, Shox2, Osr2, Hoxc9, Sp3, Myc	377	161	13588	3.35799	0.246038	0.0100355	0.26098
Annotation Cluster 4	Enrichment Score: 6.350410316843804
Category	Term	Count	%	PValue	Genes	List Total	Pop Hits	Pop Total	Fold Enrichment	Bonferroni	Benjamini	FDR
SP_PIR_KEYWORDS	mrna splicing	23	5.05495	2.22426e-09	Raly, Prpf31, Prpf4B, Ppil1, Ptbp1, Sf1, Prpf39, Sf3A2, Sf3B5, Sf3A1, Sart1, Sfrs2, Pnn, Sf3B1, Ddx39, Sfrs4, Sfrs9, Snrpb, Lsm4, Rbm39, Phf5A, Thoc2, Prpf40A	443	191	17854	4.85318	7.36229e-07	1.05176e-07	3.01682e-06
GOTERM_BP_FAT	GO:0008380~RNA splicing	23	5.05495	3.92765e-08	Raly, Prpf31, Prpf4B, Ppil1, Ptbp1, Sf1, Prpf39, Sf3A2, Sf3B5, Sf3A1, Sart1, Sfrs2, Pnn, Sf3B1, Ddx39, Sfrs4, Prmt7, Sfrs9, Snrpb, Lsm4, Rbm39, Phf5A, Prpf40A	377	201	13588	4.12426	7.22662e-05	8.02984e-06	6.68714e-05
GOTERM_CC_FAT	GO:0030529~ribonucleoprotein complex	33	7.25275	5.30578e-08	Raly, Xpo1, Prpf4B, Ppil1, Calr, Sf3B5, Sart1, Rps3, Pnn, Sf3B1, Pcbp4, Mrpl17, Pcbp1, Rpl8, Pcbp2, Lsm4, Imp4, Mrpl53, Dhx9, Prpf31, Sf1, Ssb, Rrp9, Sf3A2, Rps5, Ncl, Sf3A1, Sfrs2, Nup62, Snrpb, Ruvbl2, Phf5A, Mrpl43	298	462	12504	2.99712	1.82517e-05	3.04197e-06	7.23794e-05
SP_PIR_KEYWORDS	mrna processing	23	5.05495	1.43883e-07	Raly, Prpf31, Prpf4B, Ppil1, Ptbp1, Sf1, Prpf39, Sf3A2, Sf3B5, Sf3A1, Sart1, Sfrs2, Pnn, Sf3B1, Ddx39, Sfrs4, Sfrs9, Snrpb, Lsm4, Rbm39, Phf5A, Thoc2, Prpf40A	443	240	17854	3.86232	4.76241e-05	5.29168e-06	0.000195152
GOTERM_BP_FAT	GO:0006396~RNA processing	34	7.47253	1.68986e-07	Raly, Prpf4B, Pus1, Ppil1, Ints1, Sf3B5, Lin28B, Sart1, Pnn, Sf3B1, Sfrs4, Prmt7, Pcbp1, Sfrs9, Lsm4, Imp4, Prpf40A, Prpf31, Exosc7, Exosc4, Ptbp1, Aars, Sf1, Prpf39, Ssb, Rrp9, Sf3A2, Sf3A1, Sfrs2, Ddx39, Snrpb, Rbm39, Phf5A, Ddx54	377	437	13588	2.80422	0.000310885	2.59108e-05	0.000287711
GOTERM_BP_FAT	GO:0006397~mRNA processing	24	5.27473	1.06262e-06	Raly, Prpf31, Prpf4B, Ppil1, Ptbp1, Sf1, Prpf39, Sf3A2, Sf3B5, Sf3A1, Sart1, Sfrs2, Pnn, Sf3B1, Ddx39, Sfrs4, Prmt7, Pcbp1, Sfrs9, Snrpb, Lsm4, Rbm39, Phf5A, Prpf40A	377	262	13588	3.3016	0.00195332	0.000122194	0.00180918
GOTERM_CC_FAT	GO:0005681~spliceosome	15	3.2967	1.39686e-06	Raly, Prpf31, Prpf4B, Ppil1, Sf1, Sf3A2, Sf3B5, Sf3A1, Sart1, Pnn, Sfrs2, Sf3B1, Snrpb, Lsm4, Phf5A	298	124	12504	5.07577	0.000480405	4.80509e-05	0.00190553
KEGG_PATHWAY	mmu03040:Spliceosome	16	3.51648	8.21018e-06	Prpf31, Ppil1, Sf3A2, Sf3B5, Sf3A1, Sart1, Sfrs2, Sf3B1, Sfrs4, Pcbp1, Sfrs9, Snrpb, Lsm4, Phf5A, Thoc2, Prpf40A	185	124	5738	4.00209	0.00108316	0.000361184	0.00958672
GOTERM_BP_FAT	GO:0016071~mRNA metabolic process	24	5.27473	1.15972e-05	Raly, Prpf31, Prpf4B, Ppil1, Ptbp1, Sf1, Prpf39, Sf3A2, Sf3B5, Sf3A1, Sart1, Sfrs2, Pnn, Sf3B1, Ddx39, Sfrs4, Prmt7, Pcbp1, Sfrs9, Snrpb, Lsm4, Rbm39, Phf5A, Prpf40A	377	302	13588	2.8643	0.0211129	0.00106638	0.0197434
SP_PIR_KEYWORDS	Spliceosome	13	2.85714	1.96667e-05	Raly, Prpf31, Prpf4B, Ppil1, Sf1, Sf3A2, Sf3B5, Sf3A1, Sart1, Pnn, Sf3B1, Snrpb, Phf5A	443	111	17854	4.72011	0.00648861	0.000382853	0.0266712
Annotation Cluster 5	Enrichment Score: 5.152640983882983
Category	Term	Count	%	PValue	Genes	List Total	Pop Hits	Pop Total	Fold Enrichment	Bonferroni	Benjamini	FDR
GOTERM_CC_FAT	GO:0043228~non-membrane-bounded organelle	81	17.8022	1.46836e-07	Xpo1, Lmo1, Maea, Prpf4B, Ccdc85B, Arid4B, Rangap1, Rps3, Akt1, Esf1, Top1, Des, Homer3, Dynll2, Grwd1, Incenp, Tubb6, Top2B, Myc, Tuba1B, Imp4, Top2A, H1F0, Mrpl53, Kif11, Kif5B, Exosc7, Exosc4, Kif15, Actn1, Rrp9, Mcm2, Pcm1, Ncl, Dctn2, Arl3, Tbcb, Apitd1, Nme1, Fnbp1L, Tmsb4X, Dbn1, Mrpl43, Parvb, Map3K11, Midn, Pus1, Lmnb1, Lmnb2, Chek1, Llgl1, Spc24, Pfn1, Macf1, Crmp1, Mrpl17, Cenpb, Rpl8,…	298	1919	12504	1.7711	5.05102e-05	6.31391e-06	0.000200307
GOTERM_CC_FAT	GO:0043232~intracellular non-membrane-bounded organelle	81	17.8022	1.46836e-07	Xpo1, Lmo1, Maea, Prpf4B, Ccdc85B, Arid4B, Rangap1, Rps3, Akt1, Esf1, Top1, Des, Homer3, Dynll2, Grwd1, Incenp, Tubb6, Top2B, Myc, Tuba1B, Imp4, Top2A, H1F0, Mrpl53, Kif11, Kif5B, Exosc7, Exosc4, Kif15, Actn1, Rrp9, Mcm2, Pcm1, Ncl, Dctn2, Arl3, Tbcb, Apitd1, Nme1, Fnbp1L, Tmsb4X, Dbn1, Mrpl43, Parvb, Map3K11, Midn, Pus1, Lmnb1, Lmnb2, Chek1, Llgl1, Spc24, Pfn1, Macf1, Crmp1, Mrpl17, Cenpb, Rpl8,…	298	1919	12504	1.7711	5.05102e-05	6.31391e-06	0.000200307
GOTERM_CC_FAT	GO:0005856~cytoskeleton	39	8.57143	0.016159	Maea, Lmnb1, Lmnb2, Ccdc85B, Chek1, Rangap1, Llgl1, Akt1, Pfn1, Des, Macf1, Homer3, Dynll2, Crmp1, Incenp, Tubb6, Tuba1B, Myc, Nudc, Kif11, Kif5B, Ckap5, Kif15, Smek2, Actn1, Pcm1, Cotl1, Arl3, Dctn2, Gria2, Nup62, Tbcb, Fnbp1L, Nme1, Tmsb4X, Dbn1, Ssna1, Parvb, Map3K11	298	1122	12504	1.45849	0.996317	0.16065	19.9273
Annotation Cluster 6	Enrichment Score: 4.686857382593885
Category	Term	Count	%	PValue	Genes	List Total	Pop Hits	Pop Total	Fold Enrichment	Bonferroni	Benjamini	FDR
SP_PIR_KEYWORDS	dna-binding	69	15.1648	6.49332e-08	Gtf3A, E2F4, Gpbp1, Arid4B, Hoxd12, Hoxd13, Hoxd10, Hoxd11, Pnn, Top1, Hoxc9, Maz, Pcbp4, Pcbp1, Hoxc5, Pcbp2, Nr2F6, Top2B, Myc, Top2A, Pitx1, Twist1, H1F0, Tbx15, Gsc, Mta1, Mcm2, Ncl, Mcm5, Mycn, Hoxc10, Hoxd9, Hoxc11, Msx1, Gtf2Ird1, Tbx18, Irx3, Bclaf1, Cnbp, Hdgf, Sox9, Pole4, Ddx3X, Drap1, Lhx2, Cenpb, Runx2, Tcf3, Etv4, Sim2, Dhx9, Tcf7, Lmx1B, Tbx5, Tbx4, Myf5, Tead2, Isl1, Shox2, Obfc2B…	443	1404	17854	1.98068	2.14926e-05	2.68661e-06	8.80705e-05
SP_PIR_KEYWORDS	transcription regulation	72	15.8242	2.47646e-07	Gtf3A, E2F4, Ccdc85B, Gpbp1, Arid4B, Hoxd12, Cnot2, Hoxd13, Cnot7, Hoxd10, Hoxd11, Pnn, Esf1, Hoxc9, Maz, Prmt7, Casp8Ap2, Hoxc5, Nr2F6, Myc, Pitx1, Ccar1, Twist1, Ctbp1, Ctbp2, Tbx15, Gsc, Sf1, Mcm2, Ncl, Mcm5, Hoxc10, Hoxd9, Rbpms, Hoxc11, Msx1, Gtf2Ird1, Med9, Ruvbl2, Rbm39, Tbx18, Irx3, Bclaf1, Cnbp, Hdgf, Sox9, Drap1, Lhx2, Bcl11A, Runx2, Tcf3, Etv4, Sim2, Zmym2, Tcf7, Lmx1B, Tbx5, Trim28, T…	443	1546	17854	1.87696	8.19676e-05	8.19706e-06	0.000335889
GOTERM_MF_FAT	GO:0030528~transcription regulator activity	63	13.8462	2.71846e-07	Cops2, E2F4, Gpbp1, Hoxd12, Cnot2, Hoxd13, Cnot7, Hoxd10, Hoxd11, Hoxc9, Casp8Ap2, Hoxc5, Nr2F6, Myc, Pitx1, Twist1, Ctbp1, Ctbp2, Tbx15, Gsc, Mta1, Mycn, Hoxc10, Hoxd9, Hoxc11, Msx1, Gtf2Ird1, Med9, Rbm39, Tbx18, Irx3, Bclaf1, Pus1, Polr2I, Sox9, Drap1, Lhx2, Bcl11A, Tcf3, Runx2, Etv4, Sim2, Tcf7, Lmx1B, Tbx5, Tbx4, Myf5, Trim28, Tead2, Isl1, Shox2, Ywhah, Nup62, Meox2, Phb2, Trps1, Sp3, Hoxb9, …	354	1206	13288	1.96087	0.000138088	6.90464e-05	0.000392342
GOTERM_MF_FAT	GO:0003677~DNA binding	81	17.8022	1.05106e-06	Gtf3A, E2F4, Lmo2, Gpbp1, Arid4B, Hoxd12, Hoxd13, Hoxd10, Hoxd11, Pnn, Top1, Hoxc9, Maz, Pcbp4, Pcbp1, Hoxc5, Pcbp2, Nr2F6, Top2B, Myc, Top2A, Pitx1, Twist1, H1F0, Ctbp1, Tbx15, Gsc, Mta1, Mcm2, Ncl, Esco2, Mcm5, Mycn, Hoxc10, Hoxd9, Msx1, Hoxc11, Apitd1, Gtf2Ird1, Ruvbl2, Tbx18, Irx3, Bclaf1, Polr2F, Cnbp, Pus1, Polr2I, Hdgf, Sox9, Lin28B, Pole4, Ddx3X, Drap1, Lhx2, Cenpb, Runx2, Tcf3, Etv4, Fen…	354	1781	13288	1.70717	0.000533794	0.000177963	0.00151693
GOTERM_MF_FAT	GO:0003700~transcription factor activity	44	9.67033	3.58639e-06	Irx3, E2F4, Gpbp1, Hoxd12, Hoxd13, Sox9, Hoxd10, Hoxd11, Hoxc9, Lhx2, Hoxc5, Nr2F6, Tcf3, Myc, Runx2, Etv4, Pitx1, Twist1, Sim2, Tcf7, Ctbp1, Tbx15, Gsc, Lmx1B, Tbx5, Myf5, Tbx4, Trim28, Mta1, Tead2, Isl1, Mycn, Shox2, Hoxc10, Hoxd9, Hoxc11, Msx1, Meox2, Gtf2Ird1, Trps1, Sp3, Hoxb9, Phf5A, Tbx18	354	776	13288	2.12837	0.00182023	0.000364312	0.00517596
GOTERM_MF_FAT	GO:0043565~sequence-specific DNA binding	33	7.25275	3.31371e-05	Irx3, Hoxd12, Hoxd13, Sox9, Hoxd10, Hoxd11, Pole4, Hoxc9, Drap1, Lhx2, Hoxc5, Nr2F6, Tcf3, Myc, Etv4, Pitx1, Gsc, Lmx1B, Tbx5, Myf5, Trim28, Mta1, Mcm2, Isl1, Ncl, Hoxd9, Hoxc10, Shox2, Msx1, Hoxc11, Meox2, Trps1, Hoxb9	354	556	13288	2.2279	0.016693	0.00280172	0.0478146
SP_PIR_KEYWORDS	Transcription	71	15.6044	5.25089e-05	Gtf3A, E2F4, Ccdc85B, Gpbp1, Arid4B, Hoxd12, Cnot2, Hoxd13, Cnot7, Hoxd10, Hoxd11, Pnn, Esf1, Hoxc9, Maz, Prmt7, Casp8Ap2, Hoxc5, Nr2F6, Myc, Pitx1, Ccar1, Twist1, Ctbp1, Ctbp2, Tbx15, Sf1, Mcm2, Mcm5, Hoxc10, Hoxd9, Rbpms, Hoxc11, Msx1, Gtf2Ird1, Med9, Ruvbl2, Rbm39, Tbx18, Irx3, Bclaf1, Cnbp, Polr2F, Polr2I, Hdgf, Sox9, Drap1, Lhx2, Bcl11A, Runx2, Tcf3, Etv4, Sim2, Zmym2, Tcf7, Lmx1B, Tbx5, Tri…	443	1769	17854	1.61757	0.0172307	0.00082732	0.0711957
GOTERM_BP_FAT	GO:0045449~regulation of transcription	88	19.3407	0.000373709	Gtf3A, Cops2, E2F4, Ccdc85B, Gpbp1, Arid4B, Hoxd12, Hoxd13, Cnot2, Cnot7, Hoxd10, Hoxd11, Pnn, Esf1, Hoxc9, Maz, Prmt7, Casp8Ap2, Hoxc5, Nr2F6, Myc, Top2A, Pitx1, Ccar1, Twist1, Ctbp1, Tbx15, Ctbp2, Gsc, Pkig, Sf1, Mta1, Mcm2, Mcm5, Mycn, Hoxc10, Hoxd9, Msx1, Hoxc11, Gtf2Ird1, Med9, Ruvbl2, Rbm39, Tbx18, Irx3, Bclaf1, Cnbp, Pus1, Polr2I, Hdgf, Nedd8, Sox9, Lin28B, Pfn1, Drap1, Lhx2, Cenpb, Bcl11A…	377	2227	13588	1.42422	0.497296	0.0189229	0.634368
GOTERM_BP_FAT	GO:0006350~transcription	70	15.3846	0.00186911	Gtf3A, E2F4, Ccdc85B, Gpbp1, Arid4B, Hoxd12, Cnot2, Hoxd13, Cnot7, Hoxd10, Hoxd11, Pnn, Esf1, Hoxc9, Maz, Prmt7, Casp8Ap2, Hoxc5, Nr2F6, Myc, Pitx1, Ccar1, Twist1, Ctbp1, Ctbp2, Tbx15, Sf1, Mcm2, Mcm5, Hoxc10, Hoxd9, Hoxc11, Msx1, Gtf2Ird1, Med9, Ruvbl2, Rbm39, Tbx18, Irx3, Bclaf1, Cnbp, Polr2F, Polr2I, Hdgf, Sox9, Drap1, Lhx2, Bcl11A, Runx2, Tcf3, Etv4, Mars, Sim2, Zmym2, Tcf7, Lmx1B, Tbx5, Trim…	377	1772	13588	1.4238	0.968012	0.0706243	3.13509
GOTERM_BP_FAT	GO:0006355~regulation of transcription, DNA-dependent	59	12.967	0.00318834	E2F4, Gpbp1, Hoxd12, Hoxd13, Cnot7, Hoxd10, Hoxd11, Hoxc9, Hoxc5, Nr2F6, Myc, Top2A, Pitx1, Twist1, Ctbp1, Ctbp2, Tbx15, Gsc, Pkig, Mta1, Mycn, Hoxc10, Hoxd9, Hoxc11, Msx1, Med9, Tbx18, Irx3, Cnbp, Pus1, Nedd8, Sox9, Lin28B, Pfn1, Drap1, Lhx2, Runx2, Tcf3, Etv4, Sim2, Tcf7, Lmx1B, Tbx5, Tbx4, Myf5, Trim28, Tead2, Cenpk, Isl1, Shox2, Cdkn1C, Sall4, Meox2, Trps1, Sp3, Hoxb9, Phf5A, Id3, Tcf12	377	1465	13588	1.45154	0.997194	0.0947932	5.29191
GOTERM_BP_FAT	GO:0051252~regulation of RNA metabolic process	59	12.967	0.00435896	E2F4, Gpbp1, Hoxd12, Hoxd13, Cnot7, Hoxd10, Hoxd11, Hoxc9, Hoxc5, Nr2F6, Myc, Top2A, Pitx1, Twist1, Ctbp1, Ctbp2, Tbx15, Gsc, Pkig, Mta1, Mycn, Hoxc10, Hoxd9, Hoxc11, Msx1, Med9, Tbx18, Irx3, Cnbp, Pus1, Nedd8, Sox9, Lin28B, Pfn1, Drap1, Lhx2, Runx2, Tcf3, Etv4, Sim2, Tcf7, Lmx1B, Tbx5, Tbx4, Myf5, Trim28, Tead2, Cenpk, Isl1, Shox2, Cdkn1C, Sall4, Meox2, Trps1, Sp3, Hoxb9, Phf5A, Id3, Tcf12	377	1488	13588	1.4291	0.999677	0.113053	7.16782
Annotation Cluster 7	Enrichment Score: 4.36370153254445
Category	Term	Count	%	PValue	Genes	List Total	Pop Hits	Pop Total	Fold Enrichment	Bonferroni	Benjamini	FDR
GOTERM_MF_FAT	GO:0000166~nucleotide binding	93	20.4396	2.11711e-06	Raly, Grpel1, Prpf4B, Atp5B, Gna11, Pgd, Cad, Clk1, Mthfd1L, Akt1, Top1, Sfrs4, Ddx17, Arhgap5, Tia1, Sfrs9, Tubb6, Rhob, Dhx36, Tpr, Eif2B2, Top2B, Top2A, Tuba1B, Abce1, Ctbp1, Yars, Kif11, Ctbp2, Kif5B, Csnk1G2, Trpm7, Ptbp1, Kif15, Aars, Tbrg4, Pim3, Mcm2, Cdk4, Ncl, Mcm5, Sfrs2, Arl3, Ddx39, Rbpms, Nme1, Eif4A2, Clpp, Dld, Ube2M, Yme1L1, Ruvbl2, Txnrd1, Rbm39, Matr3, Map3K11, Gnai3, Mvd, Gnai…	354	2183	13288	1.59914	0.00107491	0.000268837	0.00305548
SP_PIR_KEYWORDS	atp-binding	58	12.7473	1.31137e-05	Prpf4B, Atp5B, Clk1, Mthfd1L, Akt1, Top1, Ddx17, Dhx36, Top2B, Top2A, Abce1, Yars, Kif11, Kif5B, Trpm7, Csnk1G2, Aars, Kif15, Pim3, Mcm2, Cdk4, Mcm5, Ddx39, Nme1, Eif4A2, Clpp, Ube2M, Ruvbl2, Yme1L1, Map3K11, Mvd, Hk2, Asns, Chek1, Kars, Galk1, Ddx3X, Kti12, Bub1, Uck2, Ehd1, Dcakd, Mars, Dhx9, Tgfbr1, Smc5, Smc6, Eprs, Smc2, Smc4, Cct7, Hsp90B1, Cct5, Psmc3, Atp5A1, Ddx54, Asna1, Guk1	443	1287	17854	1.81627	0.00433124	0.000289335	0.0177849
SP_PIR_KEYWORDS	nucleotide-binding	68	14.9451	2.46384e-05	Prpf4B, Gna11, Atp5B, Clk1, Mthfd1L, Akt1, Top1, Ddx17, Rhob, Tubb6, Dhx36, Top2B, Tuba1B, Top2A, Abce1, Yars, Kif11, Kif5B, Csnk1G2, Trpm7, Aars, Kif15, Pim3, Mcm2, Cdk4, Mcm5, Arl3, Ddx39, Nme1, Eif4A2, Clpp, Ube2M, Yme1L1, Ruvbl2, Map3K11, Gnai3, Mvd, Gnai2, Hk2, Hdgf, Asns, Chek1, Kars, Galk1, Ddx3X, Kti12, Bub1, Uck2, Ehd1, Dcakd, Mars, Dhx9, Tgfbr1, Smc5, Smc6, Eprs, Smc2, Smc4, Cct7, Rasl1…	443	1631	17854	1.6803	0.00812225	0.000452976	0.0334125
GOTERM_MF_FAT	GO:0001883~purine nucleoside binding	68	14.9451	3.32318e-05	Grpel1, Prpf4B, Atp5B, Cad, Clk1, Mthfd1L, Akt1, Top1, Ddx17, Rhob, Dhx36, Eif2B2, Top2B, Tpr, Top2A, Abce1, Yars, Kif11, Kif5B, Csnk1G2, Trpm7, Aars, Kif15, Tbrg4, Pim3, Mcm2, Cdk4, Mcm5, Ddx39, Nme1, Eif4A2, Clpp, Dld, Ube2M, Txnrd1, Ruvbl2, Yme1L1, Map3K11, Mvd, Fkbp4, Hk2, Asns, Chek1, Kars, Galk1, Ddx3X, Kti12, Bub1, Uck2, Ehd1, Runx2, Dcakd, Mars, Dhx9, Tgfbr1, Smc5, Smc6, Eprs, Smc2, Smc4,…	354	1548	13288	1.6489	0.0167403	0.00240882	0.0479513
GOTERM_MF_FAT	GO:0001882~nucleoside binding	68	14.9451	3.99423e-05	Grpel1, Prpf4B, Atp5B, Cad, Clk1, Mthfd1L, Akt1, Top1, Ddx17, Rhob, Dhx36, Eif2B2, Top2B, Tpr, Top2A, Abce1, Yars, Kif11, Kif5B, Csnk1G2, Trpm7, Aars, Kif15, Tbrg4, Pim3, Mcm2, Cdk4, Mcm5, Ddx39, Nme1, Eif4A2, Clpp, Dld, Ube2M, Txnrd1, Ruvbl2, Yme1L1, Map3K11, Mvd, Fkbp4, Hk2, Asns, Chek1, Kars, Galk1, Ddx3X, Kti12, Bub1, Uck2, Ehd1, Runx2, Dcakd, Mars, Dhx9, Tgfbr1, Smc5, Smc6, Eprs, Smc2, Smc4,…	354	1558	13288	1.63832	0.0200866	0.00253317	0.0576314
GOTERM_MF_FAT	GO:0005524~ATP binding	64	14.0659	4.53744e-05	Prpf4B, Atp5B, Cad, Clk1, Mthfd1L, Akt1, Top1, Ddx17, Dhx36, Eif2B2, Top2B, Tpr, Top2A, Abce1, Yars, Kif11, Kif5B, Csnk1G2, Trpm7, Aars, Kif15, Tbrg4, Pim3, Mcm2, Cdk4, Mcm5, Ddx39, Nme1, Eif4A2, Clpp, Ube2M, Ruvbl2, Yme1L1, Map3K11, Mvd, Fkbp4, Hk2, Asns, Chek1, Kars, Galk1, Ddx3X, Kti12, Bub1, Uck2, Ehd1, Runx2, Dcakd, Mars, Dhx9, Tgfbr1, Smc5, Smc6, Eprs, Smc2, Smc4, Cct7, Cct5, Hsp90B1, Psmc3…	354	1443	13288	1.66483	0.0227871	0.00255791	0.0654668
GOTERM_MF_FAT	GO:0030554~adenyl nucleotide binding	67	14.7253	4.64158e-05	Grpel1, Prpf4B, Atp5B, Cad, Clk1, Mthfd1L, Akt1, Top1, Ddx17, Dhx36, Eif2B2, Top2B, Tpr, Top2A, Abce1, Yars, Kif11, Kif5B, Csnk1G2, Trpm7, Aars, Kif15, Tbrg4, Pim3, Mcm2, Cdk4, Mcm5, Ddx39, Nme1, Eif4A2, Clpp, Dld, Ube2M, Txnrd1, Ruvbl2, Yme1L1, Map3K11, Mvd, Fkbp4, Hk2, Asns, Chek1, Kars, Galk1, Ddx3X, Kti12, Bub1, Uck2, Ehd1, Runx2, Dcakd, Mars, Dhx9, Tgfbr1, Smc5, Smc6, Eprs, Smc2, Smc4, Cct7,…	354	1535	13288	1.63841	0.0233039	0.0023552	0.066969
GOTERM_MF_FAT	GO:0032559~adenyl ribonucleotide binding	64	14.0659	6.50689e-05	Prpf4B, Atp5B, Cad, Clk1, Mthfd1L, Akt1, Top1, Ddx17, Dhx36, Eif2B2, Top2B, Tpr, Top2A, Abce1, Yars, Kif11, Kif5B, Csnk1G2, Trpm7, Aars, Kif15, Tbrg4, Pim3, Mcm2, Cdk4, Mcm5, Ddx39, Nme1, Eif4A2, Clpp, Ube2M, Ruvbl2, Yme1L1, Map3K11, Mvd, Fkbp4, Hk2, Asns, Chek1, Kars, Galk1, Ddx3X, Kti12, Bub1, Uck2, Ehd1, Runx2, Dcakd, Mars, Dhx9, Tgfbr1, Smc5, Smc6, Eprs, Smc2, Smc4, Cct7, Cct5, Hsp90B1, Psmc3…	354	1460	13288	1.64545	0.0325157	0.00300059	0.09387
GOTERM_MF_FAT	GO:0017076~purine nucleotide binding	77	16.9231	7.63626e-05	Grpel1, Prpf4B, Atp5B, Gna11, Cad, Clk1, Mthfd1L, Akt1, Top1, Ddx17, Arhgap5, Tubb6, Rhob, Dhx36, Tpr, Eif2B2, Top2B, Tuba1B, Top2A, Abce1, Yars, Kif11, Kif5B, Csnk1G2, Trpm7, Aars, Kif15, Tbrg4, Pim3, Mcm2, Cdk4, Mcm5, Arl3, Ddx39, Nme1, Eif4A2, Clpp, Dld, Ube2M, Yme1L1, Ruvbl2, Txnrd1, Map3K11, Gnai3, Mvd, Gnai2, Fkbp4, Hk2, Asns, Chek1, Kars, Galk1, Ddx3X, Kti12, Bub1, Uck2, Ehd1, Runx2, Dcakd…	354	1871	13288	1.5448	0.0380508	0.00322759	0.110154
GOTERM_MF_FAT	GO:0032555~purine ribonucleotide binding	74	16.2637	0.000107735	Prpf4B, Gna11, Atp5B, Cad, Clk1, Mthfd1L, Akt1, Top1, Ddx17, Arhgap5, Tubb6, Rhob, Dhx36, Tpr, Eif2B2, Top2B, Tuba1B, Top2A, Abce1, Yars, Kif11, Kif5B, Csnk1G2, Trpm7, Aars, Kif15, Tbrg4, Pim3, Mcm2, Cdk4, Mcm5, Arl3, Ddx39, Nme1, Eif4A2, Clpp, Ube2M, Yme1L1, Ruvbl2, Map3K11, Gnai3, Mvd, Gnai2, Fkbp4, Hk2, Asns, Chek1, Kars, Galk1, Ddx3X, Kti12, Bub1, Uck2, Ehd1, Runx2, Dcakd, Mars, Dhx9, Tgfbr1,…	354	1796	13288	1.54661	0.0532615	0.00420133	0.155377
GOTERM_MF_FAT	GO:0032553~ribonucleotide binding	74	16.2637	0.000107735	Prpf4B, Gna11, Atp5B, Cad, Clk1, Mthfd1L, Akt1, Top1, Ddx17, Arhgap5, Tubb6, Rhob, Dhx36, Tpr, Eif2B2, Top2B, Tuba1B, Top2A, Abce1, Yars, Kif11, Kif5B, Csnk1G2, Trpm7, Aars, Kif15, Tbrg4, Pim3, Mcm2, Cdk4, Mcm5, Arl3, Ddx39, Nme1, Eif4A2, Clpp, Ube2M, Yme1L1, Ruvbl2, Map3K11, Gnai3, Mvd, Gnai2, Fkbp4, Hk2, Asns, Chek1, Kars, Galk1, Ddx3X, Kti12, Bub1, Uck2, Ehd1, Runx2, Dcakd, Mars, Dhx9, Tgfbr1,…	354	1796	13288	1.54661	0.0532615	0.00420133	0.155377
UP_SEQ_FEATURE	nucleotide phosphate-binding region:ATP	44	9.67033	0.000391806	Prpf4B, Atp5B, Chek1, Clk1, Kars, Mthfd1L, Akt1, Galk1, Ddx17, Ddx3X, Kti12, Bub1, Dhx36, Uck2, Ehd1, Top2B, Top2A, Dcakd, Dhx9, Kif11, Kif5B, Csnk1G2, Trpm7, Tgfbr1, Kif15, Smc5, Smc6, Eprs, Pim3, Mcm2, Cdk4, Smc2, Mcm5, Smc4, Ddx39, Psmc3, Eif4A2, Ruvbl2, Yme1L1, Atp5A1, Asna1, Ddx54, Guk1, Map3K11	444	907	16021	1.75046	0.369996	0.142736	0.630158
Annotation Cluster 8	Enrichment Score: 4.362058537638095
Category	Term	Count	%	PValue	Genes	List Total	Pop Hits	Pop Total	Fold Enrichment	Bonferroni	Benjamini	FDR
SP_PIR_KEYWORDS	isopeptide bond	23	5.05495	1.67751e-06	Atp5D, Ctbp1, Slc25A4, Hdgf, Nedd8, Rangap1, Chek1, Uqcrq, Park7, Rps3, Sumo3, Top1, Pfn1, Msx1, Casp8Ap2, Nme1, Sp3, Trps1, Tuba1B, Psmd7, Bub3, Pls3, Ccar1	443	277	17854	3.34642	0.000555101	3.96603e-05	0.00227522
SP_PIR_KEYWORDS	ubl conjugation	31	6.81319	1.95692e-05	Atp5D, Hdgf, Chek1, Rangap1, Uqcrq, Sart1, Rps3, Akt1, Sumo3, Pfn1, Top1, Casp8Ap2, Bub1, Ngfrap1, Tuba1B, Psmd7, Bub3, Pls3, Ccar1, Ctbp1, Slc25A4, Smc6, Park7, Ccnd1, Msx1, Tbcb, Nme1, Trps1, Sp3, Id3, Epn1	443	524	17854	2.38431	0.00645653	0.000404759	0.0265389
UP_SEQ_FEATURE	cross-link:Glycyl lysine isopeptide (Lys-Gly) (interchain with G-Cter in ubiquitin)	13	2.85714	0.00249797	Atp5D, Slc25A4, Chek1, Uqcrq, Rps3, Pfn1, Casp8Ap2, Nme1, Psmd7, Tuba1B, Pls3, Bub3, Ccar1	444	168	16021	2.79216	0.947597	0.27938	3.95425
Annotation Cluster 9	Enrichment Score: 4.137938453730824
Category	Term	Count	%	PValue	Genes	List Total	Pop Hits	Pop Total	Fold Enrichment	Bonferroni	Benjamini	FDR
SP_PIR_KEYWORDS	cell cycle	36	7.91209	2.00247e-09	Fzr1, E2F4, Maea, Anapc13, Usp9X, Chek1, Pin1, Spc24, Gadd45Gip1, Nipbl, Casp8Ap2, Incenp, Bub1, Bub3, Stag2, Nudc, Ccar1, Kif11, Ckap5, Nasp, Pim3, Mcm2, Gas1, Cdk4, Smc2, Ppp1Cb, Esco2, Arl3, Smc4, Cdkn1C, Ppm1G, Ppp1Ca, Ccnd1, Ccnd3, Ccnd2, Pelo	443	447	17854	3.24584	6.62816e-07	1.10469e-07	2.716e-06
GOTERM_BP_FAT	GO:0007049~cell cycle	42	9.23077	1.34545e-07	Fzr1, Maea, E2F4, Anapc13, Usp9X, Chek1, Sesn3, Pin1, Spc24, Nipbl, Gadd45Gip1, Macf1, Casp8Ap2, Incenp, Cyp26B1, Bub1, Tcf3, Bub3, Stag2, Nudc, Ccar1, Kif11, Ckap5, Nasp, Sf1, Pim3, Gas1, Mcm2, Cdk4, Smc2, Ppp1Cb, Esco2, Arl3, Smc4, Cdkn1C, Ppm1G, Ppp1Ca, Ccnd1, Psmd13, Ccnd3, Ccnd2, Pelo	377	611	13588	2.47755	0.000247533	2.25055e-05	0.000229074
SP_PIR_KEYWORDS	cell division	23	5.05495	4.4381e-07	Fzr1, Kif11, Maea, Ckap5, Anapc13, Usp9X, Cdk4, Ppp1Cb, Smc2, Mcm5, Arl3, Smc4, Spc24, Ppp1Ca, Ccnd1, Ccnd3, Ccnd2, Incenp, Bub1, Pelo, Nudc, Bub3, Stag2	443	256	17854	3.62093	0.00014689	1.33546e-05	0.000601949
GOTERM_BP_FAT	GO:0051301~cell division	25	5.49451	1.01321e-06	Fzr1, Maea, Anapc13, Usp9X, Tgfb2, Spc24, Top1, Incenp, Bub1, Top2A, Nudc, Stag2, Kif11, Ckap5, Cdk4, Ppp1Cb, Smc2, Mcm5, Smc4, Arl3, Ccnd1, Ppp1Ca, Ccnd3, Ccnd2, Pelo	377	281	13588	3.20662	0.00186257	0.000124279	0.00172505
GOTERM_BP_FAT	GO:0022402~cell cycle process	28	6.15385	1.33155e-05	Fzr1, E2F4, Anapc13, Usp9X, Chek1, Sesn3, Spc24, Nipbl, Macf1, Incenp, Cyp26B1, Bub1, Tcf3, Stag2, Nudc, Bub3, Kif11, Ckap5, Sf1, Gas1, Smc2, Smc4, Cdkn1C, Ppm1G, Ppp1Ca, Ccnd1, Psmd13, Ccnd2	377	393	13588	2.56791	0.024203	0.00116602	0.0226683
GOTERM_BP_FAT	GO:0000278~mitotic cell cycle	19	4.17582	0.000155089	Fzr1, Kif11, E2F4, Ckap5, Anapc13, Usp9X, Chek1, Smc2, Smc4, Spc24, Ccnd1, Nipbl, Ccnd2, Incenp, Bub1, Tcf3, Nudc, Stag2, Bub3	377	244	13588	2.80658	0.248275	0.00979261	0.263723
GOTERM_BP_FAT	GO:0022403~cell cycle phase	22	4.83516	0.000324643	Fzr1, Kif11, E2F4, Ckap5, Anapc13, Usp9X, Chek1, Smc2, Smc4, Spc24, Ppp1Ca, Ccnd1, Psmd13, Nipbl, Ccnd2, Incenp, Cyp26B1, Bub1, Tcf3, Nudc, Stag2, Bub3	377	328	13588	2.41748	0.449781	0.0169248	0.551294
SP_PIR_KEYWORDS	mitosis	14	3.07692	0.000531178	Fzr1, Kif11, Ckap5, Anapc13, Usp9X, Smc2, Pin1, Smc4, Spc24, Incenp, Bub1, Stag2, Bub3, Nudc	443	179	17854	3.15215	0.16127	0.00626127	0.718052
GOTERM_BP_FAT	GO:0007067~mitosis	14	3.07692	0.00244438	Fzr1, Kif11, Ckap5, Anapc13, Usp9X, Smc2, Smc4, Spc24, Nipbl, Incenp, Bub1, Stag2, Bub3, Nudc	377	190	13588	2.65576	0.988926	0.0814558	4.08122
GOTERM_BP_FAT	GO:0000280~nuclear division	14	3.07692	0.00244438	Fzr1, Kif11, Ckap5, Anapc13, Usp9X, Smc2, Smc4, Spc24, Nipbl, Incenp, Bub1, Stag2, Bub3, Nudc	377	190	13588	2.65576	0.988926	0.0814558	4.08122
GOTERM_BP_FAT	GO:0000087~M phase of mitotic cell cycle	14	3.07692	0.00292986	Fzr1, Kif11, Ckap5, Anapc13, Usp9X, Smc2, Smc4, Spc24, Nipbl, Incenp, Bub1, Stag2, Bub3, Nudc	377	194	13588	2.601	0.995478	0.0934972	4.87292
GOTERM_BP_FAT	GO:0048285~organelle fission	14	3.07692	0.00334325	Fzr1, Kif11, Ckap5, Anapc13, Usp9X, Smc2, Smc4, Spc24, Nipbl, Incenp, Bub1, Stag2, Bub3, Nudc	377	197	13588	2.56139	0.997892	0.09608	5.54218
GOTERM_BP_FAT	GO:0000279~M phase	17	3.73626	0.00553755	Fzr1, Kif11, Ckap5, Anapc13, Usp9X, Smc2, Smc4, Spc24, Ppp1Ca, Psmd13, Nipbl, Incenp, Cyp26B1, Bub1, Stag2, Bub3, Nudc	377	283	13588	2.16509	0.999963	0.134032	9.02115
GOTERM_BP_FAT	GO:0007059~chromosome segregation	7	1.53846	0.00838066	Nipbl, Usp9X, Incenp, Top2A, Stag2, Bub3, Smc4	377	64	13588	3.94214	1	0.175986	13.3496
Annotation Cluster 10	Enrichment Score: 3.7949722284018375
Category	Term	Count	%	PValue	Genes	List Total	Pop Hits	Pop Total	Fold Enrichment	Bonferroni	Benjamini	FDR
GOTERM_CC_FAT	GO:0005739~mitochondrion	63	13.8462	1.00129e-07	Atp5D, Grpel1, Uqcrc1, Atp5B, Cyc1, Gfer, Timm50, Tmem11, Uqcrq, Cox4Nb, Mthfd1L, Wnt2, Mthfd2, Mrpl53, Opa3, Abce1, Slc25A4, Qdpr, Cox4I1, Tbrg4, Cyb5B, Lap3, C1Qbp, Nme1, Clpp, Dld, Txnrd1, Yme1L1, Slc25A39, Mrpl43, Mdh2, Bcat1, Fkbp8, Glrx5, Txn2, Ndufb9, Hk2, Timm13, Atp5G3, Kars, Gadd45Gip1, Atic, Mrpl17, Cox6B1, Etfb, Dcakd, Mars, Ndufa2, Shmt2, Ndufa3, Ndufa9, Ndufa7, Tomm40, Ywhae, Park7,…	298	1322	12504	1.99959	3.44437e-05	4.9206e-06	0.000136592
GOTERM_CC_FAT	GO:0019866~organelle inner membrane	24	5.27473	1.51897e-06	Atp5D, Shmt2, Ndufa2, Ndufa3, Uqcrc1, Slc25A4, Lmnb1, Lmnb2, Ndufa9, Atp5B, Ndufb9, Cyc1, Ndufa7, Cox4I1, Timm50, Timm13, Cyb5B, Uqcrq, Mrpl17, Phb2, Cox6B1, Slc25A39, Atp5A1, Mdh2	298	312	12504	3.22767	0.000522391	4.75013e-05	0.00207211
GOTERM_CC_FAT	GO:0031967~organelle envelope	33	7.25275	1.73279e-06	Atp5D, Xpo1, Fkbp8, Uqcrc1, Lmnb1, Lmnb2, Atp5B, Ndufb9, Cyc1, Timm50, Timm13, Uqcrq, Mrpl17, Cox6B1, Tpr, Ccar1, Shmt2, Ndufa2, Ndufa3, Slc25A4, Ndufa9, Ndufa7, Tomm40, Cox4I1, Cyb5B, Nup62, Ipo7, Bax, Phb2, Slc25A39, Atp5A1, Kpna3, Mdh2	298	540	12504	2.56421	0.000595901	4.9672e-05	0.00236378
GOTERM_CC_FAT	GO:0031975~envelope	33	7.25275	1.90201e-06	Atp5D, Xpo1, Fkbp8, Uqcrc1, Lmnb1, Lmnb2, Atp5B, Ndufb9, Cyc1, Timm50, Timm13, Uqcrq, Mrpl17, Cox6B1, Tpr, Ccar1, Shmt2, Ndufa2, Ndufa3, Slc25A4, Ndufa9, Ndufa7, Tomm40, Cox4I1, Cyb5B, Nup62, Ipo7, Bax, Phb2, Slc25A39, Atp5A1, Kpna3, Mdh2	298	542	12504	2.55474	0.00065408	5.0329e-05	0.00259463
KEGG_PATHWAY	mmu05016:Huntington's disease	20	4.3956	4.99082e-06	Atp5D, Clta, Polr2F, Ndufa2, Ndufa3, Uqcrc1, Slc25A4, Ndufa9, Ndufb9, Atp5B, Polr2I, Ndufa7, Cyc1, Cox4I1, Uqcrq, Atp5G3, Dctn2, Bax, Cox6B1, Atp5A1	185	183	5738	3.38975	0.000658573	0.000329341	0.0058277
GOTERM_CC_FAT	GO:0005743~mitochondrial inner membrane	22	4.83516	7.94299e-06	Atp5D, Shmt2, Ndufa2, Ndufa3, Uqcrc1, Slc25A4, Ndufa9, Atp5B, Ndufb9, Cyc1, Ndufa7, Cox4I1, Timm50, Timm13, Cyb5B, Uqcrq, Mrpl17, Phb2, Cox6B1, Slc25A39, Atp5A1, Mdh2	298	296	12504	3.11863	0.00272867	0.000195152	0.010835
KEGG_PATHWAY	mmu05012:Parkinson's disease	16	3.51648	1.9394e-05	Atp5D, Ndufa2, Ndufa3, Uqcrc1, Slc25A4, Ndufa9, Ndufb9, Atp5B, Ndufa7, Cyc1, Cox4I1, Uqcrq, Atp5G3, Park7, Cox6B1, Atp5A1	185	133	5738	3.73127	0.00255676	0.000639804	0.0226443
GOTERM_CC_FAT	GO:0044429~mitochondrial part	30	6.59341	2.01003e-05	Atp5D, Fkbp8, Grpel1, Uqcrc1, Atp5B, Ndufb9, Cyc1, Timm50, Timm13, Uqcrq, Mrpl17, Cox6B1, Etfb, Shmt2, Ndufa2, Ndufa3, Slc25A4, Ndufa9, Ndufa7, Tomm40, Cox4I1, Cyb5B, C1Qbp, Bax, Phb2, Dld, Slc25A39, Atp5A1, Mrpl43, Mdh2	298	524	12504	2.40227	0.00689071	0.000460864	0.0274165
GOTERM_CC_FAT	GO:0005740~mitochondrial envelope	25	5.49451	2.08177e-05	Atp5D, Fkbp8, Uqcrc1, Atp5B, Ndufb9, Cyc1, Timm50, Timm13, Uqcrq, Mrpl17, Cox6B1, Shmt2, Ndufa2, Ndufa3, Slc25A4, Ndufa9, Ndufa7, Tomm40, Cox4I1, Cyb5B, Bax, Phb2, Atp5A1, Slc25A39, Mdh2	298	391	12504	2.68285	0.00713577	0.000447484	0.0283949
GOTERM_CC_FAT	GO:0031966~mitochondrial membrane	24	5.27473	2.30051e-05	Atp5D, Shmt2, Ndufa2, Ndufa3, Uqcrc1, Slc25A4, Ndufa9, Atp5B, Ndufb9, Cyc1, Ndufa7, Cox4I1, Tomm40, Timm50, Timm13, Cyb5B, Uqcrq, Mrpl17, Bax, Phb2, Cox6B1, Slc25A39, Atp5A1, Mdh2	298	368	12504	2.7365	0.00788262	0.000465413	0.0313782
GOTERM_BP_FAT	GO:0006091~generation of precursor metabolites and energy	21	4.61538	3.94425e-05	Atp5D, Ndufa2, Ndufa3, Uqcrc1, Txn2, Ndufa9, Atp5B, Ndufb9, Ndufa7, Cyc1, Hk2, Cyb5B, Ppp1Cb, Uqcrq, Atp5G3, Akt1, Ppp1Ca, Dld, Atp5A1, Mdh2, Etfb	377	261	13588	2.89997	0.0700045	0.00315049	0.0671327
SP_PIR_KEYWORDS	mitochondrion inner membrane	16	3.51648	5.23806e-05	Atp5D, Ndufa2, Ndufa3, Uqcrc1, Slc25A4, Ndufb9, Atp5B, Ndufa7, Cyc1, Cox4I1, Timm50, Timm13, Uqcrq, Phb2, Slc25A39, Atp5A1	443	183	17854	3.52371	0.017189	0.000866546	0.0710218
KEGG_PATHWAY	mmu00190:Oxidative phosphorylation	15	3.2967	6.2181e-05	Atp5D, Ndufa2, Ndufa3, Uqcrc1, Ndufa9, Ndufb9, Atp5B, Ndufa7, Cyc1, Cox4I1, Uqcrq, Atp5G3, Ppa1, Cox6B1, Atp5A1	185	130	5738	3.57879	0.00817455	0.00164028	0.0725855
SP_PIR_KEYWORDS	respiratory chain	9	1.97802	0.000138805	Ndufa2, Ndufa3, Uqcrc1, Ndufa9, Ndufb9, Cyc1, Ndufa7, Cox4I1, Uqcrq	443	62	17854	5.85036	0.0449081	0.00199573	0.188101
SP_PIR_KEYWORDS	mitochondrion	38	8.35165	0.000157933	Atp5D, Fkbp8, Grpel1, Uqcrc1, Txn2, Atp5B, Ndufb9, Cyc1, Timm50, Timm13, Uqcrq, Atp5G3, Mthfd1L, Mthfd2, Mrpl17, Cox6B1, Etfb, Mrpl53, Opa3, Abce1, Ndufa2, Ndufa3, Slc25A4, Ndufa9, Ndufa7, Cox4I1, Tomm40, Cyb5B, C1Qbp, Bax, Phb2, Dld, Clpp, Yme1L1, Slc25A39, Atp5A1, Mrpl43, Mdh2	443	790	17854	1.9386	0.0509369	0.00217596	0.213997
SP_PIR_KEYWORDS	electron transport	11	2.41758	0.000185352	Ndufa2, Ndufa3, Uqcrc1, Ndufa9, Txn2, Ndufb9, Cyc1, Ndufa7, Cyb5B, Uqcrq, Etfb	443	100	17854	4.43327	0.0595127	0.00235711	0.251105
GOTERM_BP_FAT	GO:0022900~electron transport chain	12	2.63736	0.000270895	Ndufa2, Ndufa3, Uqcrc1, Ndufa9, Txn2, Ndufb9, Cyc1, Ndufa7, Dld, Cyb5B, Uqcrq, Etfb	377	112	13588	3.86169	0.392568	0.014993	0.460221
GOTERM_CC_FAT	GO:0031090~organelle membrane	35	7.69231	0.000833913	Atp5D, Fkbp8, Clta, Uqcrc1, Lmnb1, Lmnb2, Atp5B, Ndufb9, Cyc1, Timm50, Timm13, Uqcrq, Wnt2, Ap1S1, Mrpl17, Cox6B1, Rhob, Pex14, Ndufa2, Shmt2, Ndufa3, Slc25A4, Ndufa9, Ndufa7, Tomm40, Actn1, Cox4I1, Cyb5B, Gria2, Bax, Phb2, Dpm3, Slc25A39, Atp5A1, Mdh2	298	809	12504	1.81532	0.249478	0.0129601	1.13162
GOTERM_CC_FAT	GO:0070469~respiratory chain	8	1.75824	0.000851072	Ndufa2, Ndufa3, Uqcrc1, Ndufa9, Ndufb9, Cyc1, Ndufa7, Uqcrq	298	65	12504	5.16427	0.253898	0.0126538	1.15478
KEGG_PATHWAY	mmu05010:Alzheimer's disease	14	3.07692	0.00539079	Atp5D, Ndufa2, Ndufa3, Uqcrc1, Ndufa9, Ndufb9, Atp5B, Ndufa7, Cyc1, Cox4I1, Uqcrq, Atp5G3, Cox6B1, Atp5A1	185	182	5738	2.38586	0.510078	0.068865	6.11686
SP_PIR_KEYWORDS	transit peptide	20	4.3956	0.0201186	Atp5D, Mrpl53, Grpel1, Uqcrc1, Txn2, Ndufa9, Atp5B, Cyc1, Cox4I1, Timm50, Atp5G3, Mthfd1L, Mthfd2, C1Qbp, Mrpl17, Clpp, Dld, Atp5A1, Mrpl43, Mdh2	443	457	17854	1.76378	0.998802	0.138855	24.0926
UP_SEQ_FEATURE	transit peptide:Mitochondrion	20	4.3956	0.0447182	Atp5D, Mrpl53, Grpel1, Uqcrc1, Txn2, Ndufa9, Atp5B, Cyc1, Cox4I1, Timm50, Atp5G3, Mthfd1L, Mthfd2, C1Qbp, Mrpl17, Clpp, Dld, Atp5A1, Mrpl43, Mdh2	444	449	16021	1.60728	1	0.795341	52.1923
GOTERM_BP_FAT	GO:0055114~oxidation reduction	26	5.71429	0.0797653	Uqcrc1, Txn2, Ndufb9, Pgd, Hsd17B12, Cyc1, Gfer, Uqcrq, Aldh1A2, Mthfd2, Impdh1, Etfb, Ctbp1, Ndufa2, Ctbp2, Ndufa3, Ndufa9, Ndufa7, Qdpr, Cyb5B, Cdo1, Nxn, Dohh, Dld, Txnrd1, Mdh2	377	672	13588	1.3945	1	0.568462	75.7146
KEGG_PATHWAY	mmu04260:Cardiac muscle contraction	5	1.0989	0.240118	Uqcrc1, Cyc1, Cox6B1, Cox4I1, Uqcrq	185	78	5738	1.98822	1	0.655639	95.95
SP_PIR_KEYWORDS	transport	42	9.23077	0.386201	Atp5D, Xpo1, Uqcrc1, Crabp1, Chmp4B, Txn2, Ndufb9, Atp5B, Crabp2, Cyc1, Timm50, Timm13, Uqcrq, Slc7A5, Atp5G3, Akt1, Ap1S1, Ranbp3, Pex14, Rhob, Etfb, Ndufa2, Ndufa3, Slc25A4, Ndufa9, Trpm7, Nasp, Ndufa7, Tomm40, Cyb5B, Ergic1, Gria2, Nup62, Arf1, Ipo7, Slc6A6, Trappc5, Slc25A39, Atp5A1, Thoc2, Asna1, Kpna3	443	1571	17854	1.07747	1	0.827275	99.8667
Annotation Cluster 11	Enrichment Score: 3.0945847153260195
Category	Term	Count	%	PValue	Genes	List Total	Pop Hits	Pop Total	Fold Enrichment	Bonferroni	Benjamini	FDR
UP_SEQ_FEATURE	region of interest:Flexible hinge	4	0.879121	0.000676483	Smc5, Smc6, Smc2, Smc4	444	7	16021	20.619	0.549701	0.147489	1.08568
INTERPRO	IPR003395:RecF/RecN/SMC protein, N-terminal	4	0.879121	0.000725443	Smc5, Smc6, Smc2, Smc4	432	8	17763	20.559	0.45008	0.112722	1.11206
UP_SEQ_FEATURE	compositionally biased region:Ala/Asp-rich (DA-box)	4	0.879121	0.00106019	Smc5, Smc6, Smc2, Smc4	444	8	16021	18.0417	0.713676	0.188149	1.69657
Annotation Cluster 12	Enrichment Score: 3.035454868211735
Category	Term	Count	%	PValue	Genes	List Total	Pop Hits	Pop Total	Fold Enrichment	Bonferroni	Benjamini	FDR
SP_PIR_KEYWORDS	Spliceosome	13	2.85714	1.96667e-05	Raly, Prpf31, Prpf4B, Ppil1, Sf1, Sf3A2, Sf3B5, Sf3A1, Sart1, Pnn, Sf3B1, Snrpb, Phf5A	443	111	17854	4.72011	0.00648861	0.000382853	0.0266712
GOTERM_BP_FAT	GO:0000398~nuclear mRNA splicing, via spliceosome	6	1.31868	0.00332264	Sf3B1, Prpf31, Prmt7, Phf5A, Sf3A2, Sf3A1	377	37	13588	5.84472	0.99781	0.0970281	5.50892
GOTERM_BP_FAT	GO:0000377~RNA splicing, via transesterification reactions with bulged adenosine as nucleophile	6	1.31868	0.00332264	Sf3B1, Prpf31, Prmt7, Phf5A, Sf3A2, Sf3A1	377	37	13588	5.84472	0.99781	0.0970281	5.50892
GOTERM_BP_FAT	GO:0000375~RNA splicing, via transesterification reactions	6	1.31868	0.00332264	Sf3B1, Prpf31, Prmt7, Phf5A, Sf3A2, Sf3A1	377	37	13588	5.84472	0.99781	0.0970281	5.50892
Annotation Cluster 13	Enrichment Score: 2.9805562321559687
Category	Term	Count	%	PValue	Genes	List Total	Pop Hits	Pop Total	Fold Enrichment	Bonferroni	Benjamini	FDR
GOTERM_BP_FAT	GO:0006457~protein folding	15	3.2967	1.102e-05	Grpel1, Fkbp8, Fkbp4, Ppil1, Aars, Calr, Stub1, Pin1, Cct7, Pfdn2, Hsp90B1, Cct5, Ppig, Ahsa1, Fkbp2	377	127	13588	4.25698	0.0200727	0.00106663	0.0187607
SP_PIR_KEYWORDS	Isomerase	12	2.63736	0.000167802	Top1, Isyna1, Fkbp8, Ppig, Pus1, Ppil1, Fkbp4, Pdia6, Top2B, Top2A, Pin1, Fkbp2	443	118	17854	4.09856	0.0540326	0.00221942	0.227355
SP_PIR_KEYWORDS	Rotamase	6	1.31868	0.00139875	Fkbp8, Ppig, Ppil1, Fkbp4, Pin1, Fkbp2	443	34	17854	7.1122	0.370803	0.0148344	1.88058
GOTERM_MF_FAT	GO:0003755~peptidyl-prolyl cis-trans isomerase activity	6	1.31868	0.00216709	Fkbp8, Ppig, Ppil1, Fkbp4, Pin1, Fkbp2	354	35	13288	6.43487	0.667819	0.0627713	3.08255
GOTERM_MF_FAT	GO:0016859~cis-trans isomerase activity	6	1.31868	0.00278652	Fkbp8, Ppig, Ppil1, Fkbp4, Pin1, Fkbp2	354	37	13288	6.08704	0.757688	0.0757305	3.94726
INTERPRO	IPR001179:Peptidyl-prolyl cis-trans isomerase, FKBP-type	3	0.659341	0.0837539	Fkbp8, Fkbp4, Fkbp2	432	20	17763	6.16771	1	0.7913	74.0211
Annotation Cluster 14	Enrichment Score: 2.829284351509032
Category	Term	Count	%	PValue	Genes	List Total	Pop Hits	Pop Total	Fold Enrichment	Bonferroni	Benjamini	FDR
GOTERM_MF_FAT	GO:0003700~transcription factor activity	44	9.67033	3.58639e-06	Irx3, E2F4, Gpbp1, Hoxd12, Hoxd13, Sox9, Hoxd10, Hoxd11, Hoxc9, Lhx2, Hoxc5, Nr2F6, Tcf3, Myc, Runx2, Etv4, Pitx1, Twist1, Sim2, Tcf7, Ctbp1, Tbx15, Gsc, Lmx1B, Tbx5, Myf5, Tbx4, Trim28, Mta1, Tead2, Isl1, Mycn, Shox2, Hoxc10, Hoxd9, Hoxc11, Msx1, Meox2, Gtf2Ird1, Trps1, Sp3, Hoxb9, Phf5A, Tbx18	354	776	13288	2.12837	0.00182023	0.000364312	0.00517596
GOTERM_BP_FAT	GO:0006357~regulation of transcription from RNA polymerase II promoter	34	7.47253	0.000219209	Cnbp, E2F4, Pus1, Hoxd13, Nedd8, Cnot7, Sox9, Hoxd10, Pfn1, Drap1, Tcf3, Myc, Top2A, Runx2, Sim2, Ctbp1, Gsc, Lmx1B, Tbx5, Myf5, Pkig, Trim28, Tead2, Cenpk, Isl1, Shox2, Hoxd9, Cdkn1C, Msx1, Sall4, Med9, Hoxb9, Id3, Tcf12	377	616	13588	1.98936	0.331948	0.0129283	0.372567
GOTERM_BP_FAT	GO:0045941~positive regulation of transcription	27	5.93407	0.000746742	Cnbp, Pus1, Gpbp1, Hoxd13, Sox9, Cnot7, Hoxd10, Top2A, Runx2, Myc, Tcf3, Etv4, Lmx1B, Tbx5, Myf5, Trim28, Tead2, Cenpk, Isl1, Hoxd9, Shox2, Ywhah, Msx1, Sall4, Nup62, Hoxb9, Phf5A	377	475	13588	2.04873	0.747039	0.0337793	1.26381
GOTERM_BP_FAT	GO:0010628~positive regulation of gene expression	27	5.93407	0.00110271	Cnbp, Pus1, Gpbp1, Hoxd13, Sox9, Cnot7, Hoxd10, Top2A, Runx2, Myc, Tcf3, Etv4, Lmx1B, Tbx5, Myf5, Trim28, Tead2, Cenpk, Isl1, Hoxd9, Shox2, Ywhah, Msx1, Sall4, Nup62, Hoxb9, Phf5A	377	488	13588	1.99415	0.868679	0.0471864	1.86096
GOTERM_BP_FAT	GO:0045893~positive regulation of transcription, DNA-dependent	24	5.27473	0.00130753	Cnbp, Pus1, Lmx1B, Gpbp1, Tbx5, Myf5, Trim28, Hoxd13, Tead2, Cnot7, Sox9, Isl1, Cenpk, Hoxd10, Hoxd9, Shox2, Sall4, Msx1, Hoxb9, Phf5A, Runx2, Tcf3, Top2A, Myc	377	416	13588	2.07937	0.909953	0.0544481	2.20299
GOTERM_BP_FAT	GO:0051254~positive regulation of RNA metabolic process	24	5.27473	0.00143395	Cnbp, Pus1, Lmx1B, Gpbp1, Tbx5, Myf5, Trim28, Hoxd13, Tead2, Cnot7, Sox9, Isl1, Cenpk, Hoxd10, Hoxd9, Shox2, Sall4, Msx1, Hoxb9, Phf5A, Runx2, Tcf3, Top2A, Myc	377	419	13588	2.06448	0.928664	0.0582431	2.41356
GOTERM_BP_FAT	GO:0010557~positive regulation of macromolecule biosynthetic process	28	6.15385	0.00171296	Cnbp, Pus1, Gpbp1, Hoxd13, Sox9, Cnot7, Hoxd10, Top2A, Runx2, Myc, Tcf3, Etv4, Lmx1B, Tbx5, Myf5, Trim28, Tead2, Cenpk, Isl1, Cdk4, Hoxd9, Shox2, Ywhah, Msx1, Sall4, Nup62, Hoxb9, Phf5A	377	530	13588	1.90413	0.957343	0.0677006	2.87677
GOTERM_BP_FAT	GO:0045935~positive regulation of nucleobase, nucleoside, nucleotide and nucleic acid metabolic process	27	5.93407	0.00206075	Cnbp, Pus1, Gpbp1, Hoxd13, Sox9, Cnot7, Hoxd10, Top2A, Runx2, Myc, Tcf3, Etv4, Lmx1B, Tbx5, Myf5, Trim28, Tead2, Cenpk, Isl1, Hoxd9, Shox2, Ywhah, Msx1, Sall4, Nup62, Hoxb9, Phf5A	377	510	13588	1.90813	0.977533	0.074539	3.45125
GOTERM_BP_FAT	GO:0045944~positive regulation of transcription from RNA polymerase II promoter	21	4.61538	0.00238836	Cnbp, Pus1, Lmx1B, Tbx5, Myf5, Hoxd13, Tead2, Cnot7, Sox9, Isl1, Cenpk, Hoxd10, Hoxd9, Shox2, Sall4, Msx1, Hoxb9, Runx2, Myc, Top2A, Tcf3	377	358	13588	2.11422	0.987721	0.0826548	3.98948
GOTERM_BP_FAT	GO:0031328~positive regulation of cellular biosynthetic process	28	6.15385	0.00302668	Cnbp, Pus1, Gpbp1, Hoxd13, Sox9, Cnot7, Hoxd10, Top2A, Runx2, Myc, Tcf3, Etv4, Lmx1B, Tbx5, Myf5, Trim28, Tead2, Cenpk, Isl1, Cdk4, Hoxd9, Shox2, Ywhah, Msx1, Sall4, Nup62, Hoxb9, Phf5A	377	552	13588	1.82824	0.996218	0.0932164	5.03006
GOTERM_BP_FAT	GO:0051173~positive regulation of nitrogen compound metabolic process	27	5.93407	0.00315721	Cnbp, Pus1, Gpbp1, Hoxd13, Sox9, Cnot7, Hoxd10, Top2A, Runx2, Myc, Tcf3, Etv4, Lmx1B, Tbx5, Myf5, Trim28, Tead2, Cenpk, Isl1, Hoxd9, Shox2, Ywhah, Msx1, Sall4, Nup62, Hoxb9, Phf5A	377	526	13588	1.85009	0.997028	0.0954506	5.24154
GOTERM_BP_FAT	GO:0006355~regulation of transcription, DNA-dependent	59	12.967	0.00318834	E2F4, Gpbp1, Hoxd12, Hoxd13, Cnot7, Hoxd10, Hoxd11, Hoxc9, Hoxc5, Nr2F6, Myc, Top2A, Pitx1, Twist1, Ctbp1, Ctbp2, Tbx15, Gsc, Pkig, Mta1, Mycn, Hoxc10, Hoxd9, Hoxc11, Msx1, Med9, Tbx18, Irx3, Cnbp, Pus1, Nedd8, Sox9, Lin28B, Pfn1, Drap1, Lhx2, Runx2, Tcf3, Etv4, Sim2, Tcf7, Lmx1B, Tbx5, Tbx4, Myf5, Trim28, Tead2, Cenpk, Isl1, Shox2, Cdkn1C, Sall4, Meox2, Trps1, Sp3, Hoxb9, Phf5A, Id3, Tcf12	377	1465	13588	1.45154	0.997194	0.0947932	5.29191
GOTERM_BP_FAT	GO:0009891~positive regulation of biosynthetic process	28	6.15385	0.0034346	Cnbp, Pus1, Gpbp1, Hoxd13, Sox9, Cnot7, Hoxd10, Top2A, Runx2, Myc, Tcf3, Etv4, Lmx1B, Tbx5, Myf5, Trim28, Tead2, Cenpk, Isl1, Cdk4, Hoxd9, Shox2, Ywhah, Msx1, Sall4, Nup62, Hoxb9, Phf5A	377	557	13588	1.81183	0.998219	0.095601	5.68947
GOTERM_BP_FAT	GO:0051252~regulation of RNA metabolic process	59	12.967	0.00435896	E2F4, Gpbp1, Hoxd12, Hoxd13, Cnot7, Hoxd10, Hoxd11, Hoxc9, Hoxc5, Nr2F6, Myc, Top2A, Pitx1, Twist1, Ctbp1, Ctbp2, Tbx15, Gsc, Pkig, Mta1, Mycn, Hoxc10, Hoxd9, Hoxc11, Msx1, Med9, Tbx18, Irx3, Cnbp, Pus1, Nedd8, Sox9, Lin28B, Pfn1, Drap1, Lhx2, Runx2, Tcf3, Etv4, Sim2, Tcf7, Lmx1B, Tbx5, Tbx4, Myf5, Trim28, Tead2, Cenpk, Isl1, Shox2, Cdkn1C, Sall4, Meox2, Trps1, Sp3, Hoxb9, Phf5A, Id3, Tcf12	377	1488	13588	1.4291	0.999677	0.113053	7.16782
GOTERM_BP_FAT	GO:0010604~positive regulation of macromolecule metabolic process	30	6.59341	0.00544991	Cnbp, Pus1, Gpbp1, Hoxd13, Sox9, Cnot7, Stub1, Hoxd10, Akt1, Top2A, Runx2, Myc, Tcf3, Etv4, Lmx1B, Tbx5, Myf5, Trim28, Tead2, Cenpk, Isl1, Cdk4, Hoxd9, Shox2, Ywhah, Msx1, Sall4, Nup62, Hoxb9, Phf5A	377	633	13588	1.70817	0.999957	0.133806	8.88455
GOTERM_MF_FAT	GO:0016563~transcription activator activity	14	3.07692	0.0211816	Pus1, Tbx5, Trim28, Tead2, Sox9, Cnot7, Hoxd9, Ywhah, Hoxc9, Hoxb9, Rbm39, Tcf12, Tcf3, Etv4	354	259	13288	2.02901	0.999981	0.352757	26.5811
Annotation Cluster 15	Enrichment Score: 2.3930294194488826
Category	Term	Count	%	PValue	Genes	List Total	Pop Hits	Pop Total	Fold Enrichment	Bonferroni	Benjamini	FDR
INTERPRO	IPR006711:Hox9 activation region	3	0.659341	0.00341195	Hoxd9, Hoxc9, Hoxb9	432	4	17763	30.8385	0.94017	0.245444	5.13039
INTERPRO	IPR017112:Homeobox, Hox9	3	0.659341	0.00341195	Hoxd9, Hoxc9, Hoxb9	432	4	17763	30.8385	0.94017	0.245444	5.13039
PIR_SUPERFAMILY	PIRSF037109:homeobox protein, Hox9 type	3	0.659341	0.00479666	Hoxd9, Hoxc9, Hoxb9	236	4	8136	25.8559	0.717635	0.717635	6.10199
PIR_SUPERFAMILY	PIRSF037109:Homeobox_Hox9	3	0.659341	0.00479666	Hoxd9, Hoxc9, Hoxb9	236	4	8136	25.8559	0.717635	0.717635	6.10199
Annotation Cluster 16	Enrichment Score: 2.391988309606759
Category	Term	Count	%	PValue	Genes	List Total	Pop Hits	Pop Total	Fold Enrichment	Bonferroni	Benjamini	FDR
GOTERM_CC_FAT	GO:0005694~chromosome	23	5.05495	0.000100753	H1f0, Xpo1, Prpf4B, Trim28, Arid4B, Smc5, Smc6, Rangap1, Chek1, Mcm2, Cenpk, Smc2, Smc4, Spc24, Top1, Apitd1, Incenp, Cenpb, Supt16H, Bub1, Top2B, Tcf3, Top2A	298	378	12504	2.55311	0.0340669	0.00164915	0.137356
GOTERM_CC_FAT	GO:0000775~chromosome, centromeric region	8	1.75824	0.0165572	Spc24, Xpo1, Apitd1, Cenpb, Incenp, Bub1, Rangap1, Cenpk	298	111	12504	3.02412	0.996796	0.159737	20.3683
GOTERM_CC_FAT	GO:0044427~chromosomal part	14	3.07692	0.0399754	H1f0, Xpo1, Arid4B, Trim28, Chek1, Rangap1, Mcm2, Cenpk, Spc24, Apitd1, Incenp, Cenpb, Bub1, Tcf3	298	318	12504	1.84728	0.999999	0.302215	42.6804
Annotation Cluster 17	Enrichment Score: 2.3284839346033843
Category	Term	Count	%	PValue	Genes	List Total	Pop Hits	Pop Total	Fold Enrichment	Bonferroni	Benjamini	FDR
GOTERM_BP_FAT	GO:0051216~cartilage development	11	2.41758	5.50092e-05	Shox2, Msx1, Fgf9, Myf5, Col2A1, Col1A1, Sox9, Runx2, Pitx1, Hoxd11, Tgfb2	377	78	13588	5.08291	0.0962655	0.00420861	0.0936162
GOTERM_BP_FAT	GO:0060350~endochondral bone morphogenesis	6	1.31868	0.000173777	Shox2, Col2A1, Col1A1, Sox9, Runx2, Hoxd11	377	20	13588	10.8127	0.27369	0.0106027	0.295458
GOTERM_BP_FAT	GO:0060351~cartilage development involved in endochondral bone morphogenesis	4	0.879121	0.000395073	Shox2, Col2A1, Col1A1, Hoxd11	377	6	13588	24.0283	0.516681	0.0194589	0.670517
GOTERM_BP_FAT	GO:0060349~bone morphogenesis	6	1.31868	0.000643158	Shox2, Col2A1, Col1A1, Sox9, Runx2, Hoxd11	377	26	13588	8.31749	0.693884	0.0298976	1.0894
GOTERM_BP_FAT	GO:0032330~regulation of chondrocyte differentiation	4	0.879121	0.0090034	Shox2, Sox9, Runx2, Hoxd11	377	16	13588	9.01061	1	0.179721	14.2715
GOTERM_BP_FAT	GO:0060348~bone development	9	1.97802	0.0167119	Shox2, Fgf9, Sp3, Myf5, Col2A1, Col1A1, Sox9, Runx2, Hoxd11	377	118	13588	2.749	1	0.278496	24.9441
GOTERM_BP_FAT	GO:0002062~chondrocyte differentiation	4	0.879121	0.0193126	Shox2, Fgf9, Col2A1, Runx2	377	21	13588	6.86523	1	0.306602	28.2533
GOTERM_BP_FAT	GO:0001958~endochondral ossification	3	0.659341	0.0709926	Col2A1, Col1A1, Runx2	377	16	13588	6.75796	1	0.555741	71.4569
GOTERM_BP_FAT	GO:0001503~ossification	7	1.53846	0.0737558	Shox2, Fgf9, Sp3, Myf5, Col2A1, Col1A1, Runx2	377	106	13588	2.38016	1	0.563633	72.8684
GOTERM_BP_FAT	GO:0001649~osteoblast differentiation	4	0.879121	0.140429	Shox2, Fgf9, Col1A1, Runx2	377	47	13588	3.06744	1	0.691124	92.395
Annotation Cluster 18	Enrichment Score: 2.1274123240755647
Category	Term	Count	%	PValue	Genes	List Total	Pop Hits	Pop Total	Fold Enrichment	Bonferroni	Benjamini	FDR
SP_PIR_KEYWORDS	proteasome	9	1.97802	5.07626e-05	Psmb4, Psmd13, Psmb6, Psmc3, Psmb2, Psmd3, Psme4, Psma7, Psmd7	443	54	17854	6.71708	0.0166625	0.00088397	0.0688287
GOTERM_CC_FAT	GO:0000502~proteasome complex	9	1.97802	6.29749e-05	Psmb4, Psmd13, Psmb6, Psmc3, Psmb2, Psmd3, Psme4, Psma7, Psmd7	298	58	12504	6.51099	0.0214311	0.00113956	0.0858739
KEGG_PATHWAY	mmu03050:Proteasome	9	1.97802	0.000103332	Psmb4, Psmd13, Psmb6, Psmc3, Psmb2, Psmd3, Psme4, Psma7, Psmd7	185	47	5738	5.93928	0.0135479	0.00227084	0.120596
INTERPRO	IPR001353:Proteasome, alpha and beta subunits	4	0.879121	0.00627894	Psmb4, Psmb6, Psmb2, Psma7	432	16	17763	10.2795	0.994429	0.329172	9.24996
GOTERM_CC_FAT	GO:0005839~proteasome core complex	4	0.879121	0.0112092	Psmb4, Psmb6, Psmb2, Psma7	298	20	12504	8.39195	0.979302	0.117581	14.2535
INTERPRO	IPR001353:Proteasome, subunit alpha/beta	4	0.879121	0.0118982	Psmb4, Psmb6, Psmb2, Psma7	432	20	17763	8.22361	0.999948	0.404945	16.8436
SP_PIR_KEYWORDS	threonine protease	4	0.879121	0.0143895	Psmb4, Psmb6, Psmb2, Psma7	443	21	17854	7.67666	0.99175	0.115748	17.8469
GOTERM_MF_FAT	GO:0004298~threonine-type endopeptidase activity	4	0.879121	0.0173361	Psmb4, Psmb6, Psmb2, Psma7	354	21	13288	7.14985	0.999861	0.30938	22.3065
GOTERM_MF_FAT	GO:0070003~threonine-type peptidase activity	4	0.879121	0.0173361	Psmb4, Psmb6, Psmb2, Psma7	354	21	13288	7.14985	0.999861	0.30938	22.3065
INTERPRO	IPR016050:Proteasome, beta-type subunit, conserved site	3	0.659341	0.0383947	Psmb4, Psmb6, Psmb2	432	13	17763	9.48878	1	0.591853	45.2999
GOTERM_MF_FAT	GO:0004175~endopeptidase activity	10	2.1978	0.791859	Capn6, Psmb4, Prep, Psmd13, Uqcrc1, Psmb6, Psmb2, Clpp, Yme1L1, Psma7	354	421	13288	0.891609	1	0.999627	100
SP_PIR_KEYWORDS	Protease	11	2.41758	0.813388	Lap3, Psmb4, Prep, Psmb6, Usp9X, Psmb2, Clpp, Cpa2, Yme1L1, Psma7, Dnpep	443	509	17854	0.870977	1	0.98987	100
Annotation Cluster 19	Enrichment Score: 2.105639678609187
Category	Term	Count	%	PValue	Genes	List Total	Pop Hits	Pop Total	Fold Enrichment	Bonferroni	Benjamini	FDR
INTERPRO	IPR001699:Transcription factor, T-box	4	0.879121	0.0074888	Tbx15, Tbx5, Tbx4, Tbx18	432	17	17763	9.67484	0.997958	0.338293	10.9377
INTERPRO	IPR018186:Transcription factor, T-box, conserved site	4	0.879121	0.0074888	Tbx15, Tbx5, Tbx4, Tbx18	432	17	17763	9.67484	0.997958	0.338293	10.9377
SMART	SM00425:TBOX	4	0.879121	0.00749375	Tbx15, Tbx5, Tbx4, Tbx18	223	17	9131	9.6344	0.708759	0.265379	8.71739
UP_SEQ_FEATURE	DNA-binding region:T-box	4	0.879121	0.00899327	Tbx15, Tbx5, Tbx4, Tbx18	444	16	16021	9.02083	0.999976	0.446627	13.5607
Annotation Cluster 20	Enrichment Score: 2.0745356372742014
Category	Term	Count	%	PValue	Genes	List Total	Pop Hits	Pop Total	Fold Enrichment	Bonferroni	Benjamini	FDR
GOTERM_MF_FAT	GO:0003918~DNA topoisomerase (ATP-hydrolyzing) activity	3	0.659341	0.00407535	Top1, Top2B, Top2A	354	4	13288	28.1525	0.874382	0.103435	5.72346
SP_PIR_KEYWORDS	topoisomerase	3	0.659341	0.00858644	Top1, Top2B, Top2A	443	6	17854	20.1512	0.942409	0.0762266	11.0382
GOTERM_MF_FAT	GO:0003916~DNA topoisomerase activity	3	0.659341	0.00983458	Top1, Top2B, Top2A	354	6	13288	18.7684	0.9934	0.212649	13.2934
GOTERM_BP_FAT	GO:0006265~DNA topological change	3	0.659341	0.0146259	Top1, Top2B, Top2A	377	7	13588	15.4468	1	0.252866	22.1866
Annotation Cluster 21	Enrichment Score: 2.0651080772773147
Category	Term	Count	%	PValue	Genes	List Total	Pop Hits	Pop Total	Fold Enrichment	Bonferroni	Benjamini	FDR
SMART	SM00322:KH	6	1.31868	0.00238334	Pcbp4, Pcbp1, Pcbp2, Sf1, Fxr1, Rps3	223	39	9131	6.29941	0.323846	0.177714	2.85198
INTERPRO	IPR004087:K Homology	6	1.31868	0.00239769	Pcbp4, Pcbp1, Pcbp2, Sf1, Fxr1, Rps3	432	39	17763	6.32585	0.861664	0.219061	3.63161
INTERPRO	IPR004088:K Homology, type 1	5	1.0989	0.00640325	Pcbp4, Pcbp1, Pcbp2, Sf1, Fxr1	432	31	17763	6.63194	0.994975	0.31483	9.42474
INTERPRO	IPR018111:K Homology, type 1, subgroup	5	1.0989	0.00801718	Pcbp4, Pcbp1, Pcbp2, Sf1, Fxr1	432	33	17763	6.23001	0.998684	0.339362	11.6655
UP_SEQ_FEATURE	domain:KH 2	4	0.879121	0.0168738	Pcbp4, Pcbp1, Pcbp2, Fxr1	444	20	16021	7.21667	1	0.566558	24.0061
UP_SEQ_FEATURE	domain:KH 1	4	0.879121	0.0168738	Pcbp4, Pcbp1, Pcbp2, Fxr1	444	20	16021	7.21667	1	0.566558	24.0061
UP_SEQ_FEATURE	domain:KH 3	3	0.659341	0.0419195	Pcbp4, Pcbp1, Pcbp2	444	12	16021	9.02083	1	0.783457	49.8821
Annotation Cluster 22	Enrichment Score: 2.063779003020073
Category	Term	Count	%	PValue	Genes	List Total	Pop Hits	Pop Total	Fold Enrichment	Bonferroni	Benjamini	FDR
UP_SEQ_FEATURE	repeat:HEAT 5	6	1.31868	0.00127198	Sf3B1, Ppp2R1A, Xpo1, Nipbl, Ckap5, Psme4	444	30	16021	7.21667	0.777007	0.171035	2.03222
UP_SEQ_FEATURE	repeat:HEAT 4	6	1.31868	0.00332089	Sf3B1, Ppp2R1A, Xpo1, Nipbl, Ckap5, Psme4	444	37	16021	5.85135	0.980195	0.299899	5.22447
UP_SEQ_FEATURE	repeat:HEAT 10	4	0.879121	0.00383516	Sf3B1, Ppp2R1A, Xpo1, Ckap5	444	12	16021	12.0278	0.989223	0.314447	6.01026
UP_SEQ_FEATURE	repeat:HEAT 9	4	0.879121	0.00488427	Sf3B1, Ppp2R1A, Xpo1, Ckap5	444	13	16021	11.1026	0.996889	0.358567	7.59434
UP_SEQ_FEATURE	repeat:HEAT 3	6	1.31868	0.00521725	Sf3B1, Ppp2R1A, Xpo1, Nipbl, Ckap5, Psme4	444	41	16021	5.28049	0.997903	0.356297	8.09187
UP_SEQ_FEATURE	repeat:HEAT 6	5	1.0989	0.00532095	Sf3B1, Ppp2R1A, Xpo1, Ckap5, Psme4	444	26	16021	6.9391	0.998146	0.342521	8.24629
UP_SEQ_FEATURE	repeat:HEAT 8	4	0.879121	0.00899327	Sf3B1, Ppp2R1A, Xpo1, Ckap5	444	16	16021	9.02083	0.999976	0.446627	13.5607
UP_SEQ_FEATURE	repeat:HEAT 2	6	1.31868	0.0101883	Sf3B1, Ppp2R1A, Xpo1, Nipbl, Ckap5, Psme4	444	48	16021	4.51042	0.999994	0.470305	15.2269
UP_SEQ_FEATURE	repeat:HEAT 1	6	1.31868	0.0101883	Sf3B1, Ppp2R1A, Xpo1, Nipbl, Ckap5, Psme4	444	48	16021	4.51042	0.999994	0.470305	15.2269
UP_SEQ_FEATURE	repeat:HEAT 7	4	0.879121	0.0192902	Sf3B1, Ppp2R1A, Xpo1, Ckap5	444	21	16021	6.87302	1	0.600929	26.9637
INTERPRO	IPR011989:Armadillo-like helical	8	1.75824	0.0392723	Hspbp1, Sf3B1, Ppp2R1A, Xpo1, Ckap5, Dohh, Ipo7, Kpna3	432	130	17763	2.53034	1	0.58053	46.0642
INTERPRO	IPR000357:HEAT	4	0.879121	0.110499	Sf3B1, Ppp2R1A, Ckap5, Psme4	432	48	17763	3.4265	1	0.866029	83.5425
Annotation Cluster 23	Enrichment Score: 2.0098392369778724
Category	Term	Count	%	PValue	Genes	List Total	Pop Hits	Pop Total	Fold Enrichment	Bonferroni	Benjamini	FDR
GOTERM_CC_FAT	GO:0015630~microtubule cytoskeleton	21	4.61538	0.00542245	Kif11, Kif5B, Ckap5, Ccdc85B, Kif15, Smek2, Pcm1, Dctn2, Arl3, Akt1, Tbcb, Macf1, Dynll2, Nme1, Incenp, Tubb6, Myc, Ssna1, Tuba1B, Nudc, Map3K11	298	450	12504	1.95812	0.845938	0.0749739	7.14884
SP_PIR_KEYWORDS	cytoskeleton	25	5.49451	0.0106628	Maea, Ccdc85B, Rangap1, Chek1, Llgl1, Pfn1, Macf1, Crmp1, Incenp, Nudc, Kif5B, Kif15, Smek2, Actn1, Cotl1, Pcm1, Dctn2, Arl3, Tbcb, Nup62, Fnbp1L, Tmsb4X, Ssna1, Parvb, Map3K11	443	583	17854	1.72824	0.971228	0.0914463	13.5323
GOTERM_CC_FAT	GO:0005856~cytoskeleton	39	8.57143	0.016159	Maea, Lmnb1, Lmnb2, Ccdc85B, Chek1, Rangap1, Llgl1, Akt1, Pfn1, Des, Macf1, Homer3, Dynll2, Crmp1, Incenp, Tubb6, Tuba1B, Myc, Nudc, Kif11, Kif5B, Ckap5, Kif15, Smek2, Actn1, Pcm1, Cotl1, Arl3, Dctn2, Gria2, Nup62, Tbcb, Fnbp1L, Nme1, Tmsb4X, Dbn1, Ssna1, Parvb, Map3K11	298	1122	12504	1.45849	0.996317	0.16065	19.9273
Annotation Cluster 24	Enrichment Score: 1.9507691484893763
Category	Term	Count	%	PValue	Genes	List Total	Pop Hits	Pop Total	Fold Enrichment	Bonferroni	Benjamini	FDR
GOTERM_BP_FAT	GO:0006417~regulation of translation	10	2.1978	0.00179178	Akt1, Eif4G1, Eif4G2, Ppp1Ca, Eif4Ebp1, Eif4Ebp2, Paip2, Tia1, Cdk4, Fxr1	377	100	13588	3.60424	0.96311	0.0692228	3.00723
GOTERM_BP_FAT	GO:0017148~negative regulation of translation	5	1.0989	0.00284285	Eif4Ebp1, Eif4Ebp2, Paip2, Tia1, Fxr1	377	22	13588	8.19146	0.994691	0.0924488	4.73147
GOTERM_BP_FAT	GO:0010608~posttranscriptional regulation of gene expression	11	2.41758	0.00811486	Akt1, Eif4G1, Eif4G2, Ppp1Ca, Eif4Ebp1, Eif4Ebp2, Paip2, Tia1, Cdk4, Lin28B, Fxr1	377	148	13588	2.67883	1	0.172855	12.9533
GOTERM_BP_FAT	GO:0032269~negative regulation of cellular protein metabolic process	7	1.53846	0.0145439	Eif4Ebp1, Eif4Ebp2, Paip2, Bax, Tia1, Ywhae, Fxr1	377	72	13588	3.50413	1	0.253988	22.0762
SP_PIR_KEYWORDS	translation regulation	6	1.31868	0.0197428	Akt1, Eif4G1, Eif4G2, Eif4Ebp1, Eif4Ebp2, Paip2	443	63	17854	3.83833	0.99864	0.139297	23.6968
GOTERM_BP_FAT	GO:0051248~negative regulation of protein metabolic process	7	1.53846	0.020856	Eif4Ebp1, Eif4Ebp2, Paip2, Bax, Tia1, Ywhae, Fxr1	377	78	13588	3.23458	1	0.318848	30.1518
GOTERM_BP_FAT	GO:0032268~regulation of cellular protein metabolic process	13	2.85714	0.089326	Paip2, Cdk4, Ywhae, Stub1, Fxr1, Eif4G1, Akt1, Eif4G2, Eif4Ebp1, Ppp1Ca, Eif4Ebp2, Bax, Tia1	377	280	13588	1.6734	1	0.580856	79.6707
Annotation Cluster 25	Enrichment Score: 1.9079538118055344
Category	Term	Count	%	PValue	Genes	List Total	Pop Hits	Pop Total	Fold Enrichment	Bonferroni	Benjamini	FDR
GOTERM_BP_FAT	GO:0035295~tube development	16	3.51648	0.00683233	Fgf9, Tbx5, Tbx4, Mycn, Hoxd11, Ednra, Wnt2, Aldh1A2, Pfn1, Ppp1Ca, Phb2, Sp3, Robo2, Etv4, Sim2, Twist1	377	264	13588	2.18439	0.999997	0.158697	11.017
GOTERM_BP_FAT	GO:0030324~lung development	9	1.97802	0.0118935	Wnt2, Aldh1A2, Ppp1Ca, Fgf9, Sp3, Tbx5, Tbx4, Sim2, Mycn	377	111	13588	2.92236	1	0.219141	18.4301
GOTERM_BP_FAT	GO:0030323~respiratory tube development	9	1.97802	0.0131497	Wnt2, Aldh1A2, Ppp1Ca, Fgf9, Sp3, Tbx5, Tbx4, Sim2, Mycn	377	113	13588	2.87064	1	0.234823	20.1778
GOTERM_BP_FAT	GO:0060541~respiratory system development	9	1.97802	0.021847	Wnt2, Aldh1A2, Ppp1Ca, Fgf9, Sp3, Tbx5, Tbx4, Sim2, Mycn	377	124	13588	2.61598	1	0.326052	31.3456
Annotation Cluster 26	Enrichment Score: 1.8345682104528926
Category	Term	Count	%	PValue	Genes	List Total	Pop Hits	Pop Total	Fold Enrichment	Bonferroni	Benjamini	FDR
GOTERM_BP_FAT	GO:0031327~negative regulation of cellular biosynthetic process	24	5.27473	0.001995	Cops2, Bclaf1, Ctbp1, Gsc, Ctbp2, Ccdc85B, Paip2, Pkig, Trim28, Sox9, Fxr1, Cdkn1C, Ednra, Shox2, Eif4Ebp1, Sall4, Msx1, Eif4Ebp2, Drap1, Tia1, Trps1, Id3, Myc, Sim2	377	430	13588	2.01167	0.974637	0.0736946	3.34288
GOTERM_BP_FAT	GO:0009890~negative regulation of biosynthetic process	24	5.27473	0.00228455	Cops2, Bclaf1, Ctbp1, Gsc, Ctbp2, Ccdc85B, Paip2, Pkig, Trim28, Sox9, Fxr1, Cdkn1C, Ednra, Shox2, Eif4Ebp1, Sall4, Msx1, Eif4Ebp2, Drap1, Tia1, Trps1, Id3, Myc, Sim2	377	434	13588	1.99313	0.985129	0.0807227	3.81922
GOTERM_BP_FAT	GO:0010558~negative regulation of macromolecule biosynthetic process	23	5.05495	0.00302201	Cops2, Bclaf1, Ctbp1, Gsc, Ctbp2, Ccdc85B, Paip2, Pkig, Trim28, Sox9, Fxr1, Cdkn1C, Shox2, Eif4Ebp1, Sall4, Msx1, Eif4Ebp2, Drap1, Tia1, Trps1, Id3, Myc, Sim2	377	418	13588	1.9832	0.996185	0.0946602	5.02248
GOTERM_BP_FAT	GO:0010605~negative regulation of macromolecule metabolic process	26	5.71429	0.00376826	Cops2, Bclaf1, Ccdc85B, Sox9, Lin28B, Eif4Ebp1, Eif4Ebp2, Drap1, Tia1, Myc, Sim2, Ctbp1, Gsc, Ctbp2, Paip2, Trim28, Pkig, Ywhae, Fxr1, Cdkn1C, Shox2, Sall4, Msx1, Trps1, Bax, Id3	377	506	13588	1.85198	0.999038	0.102859	6.22564
GOTERM_BP_FAT	GO:0045934~negative regulation of nucleobase, nucleoside, nucleotide and nucleic acid metabolic process	19	4.17582	0.0275076	Cops2, Bclaf1, Ctbp1, Gsc, Ctbp2, Ccdc85B, Pkig, Trim28, Sox9, Cdkn1C, Shox2, Ednra, Sall4, Msx1, Drap1, Trps1, Id3, Myc, Sim2	377	397	13588	1.72495	1	0.362502	37.8054
GOTERM_BP_FAT	GO:0016481~negative regulation of transcription	18	3.95604	0.0300464	Cops2, Bclaf1, Ctbp1, Gsc, Ctbp2, Ccdc85B, Pkig, Trim28, Sox9, Shox2, Cdkn1C, Sall4, Msx1, Drap1, Trps1, Id3, Myc, Sim2	377	372	13588	1.74399	1	0.381074	40.5127
GOTERM_BP_FAT	GO:0051172~negative regulation of nitrogen compound metabolic process	19	4.17582	0.0307102	Cops2, Bclaf1, Ctbp1, Gsc, Ctbp2, Ccdc85B, Pkig, Trim28, Sox9, Cdkn1C, Shox2, Ednra, Sall4, Msx1, Drap1, Trps1, Id3, Myc, Sim2	377	401	13588	1.70775	1	0.382633	41.202
GOTERM_BP_FAT	GO:0010629~negative regulation of gene expression	19	4.17582	0.0371243	Cops2, Bclaf1, Ctbp1, Gsc, Ctbp2, Ccdc85B, Pkig, Trim28, Sox9, Lin28B, Cdkn1C, Shox2, Sall4, Msx1, Drap1, Trps1, Id3, Myc, Sim2	377	410	13588	1.67026	1	0.424463	47.4866
GOTERM_BP_FAT	GO:0045892~negative regulation of transcription, DNA-dependent	15	3.2967	0.0478758	Ctbp1, Gsc, Ctbp2, Trim28, Pkig, Sox9, Shox2, Cdkn1C, Msx1, Sall4, Drap1, Trps1, Id3, Myc, Sim2	377	308	13588	1.75531	1	0.485083	56.6247
GOTERM_BP_FAT	GO:0051253~negative regulation of RNA metabolic process	15	3.2967	0.049647	Ctbp1, Gsc, Ctbp2, Trim28, Pkig, Sox9, Shox2, Cdkn1C, Msx1, Sall4, Drap1, Trps1, Id3, Myc, Sim2	377	310	13588	1.74399	1	0.490371	57.9783
GOTERM_BP_FAT	GO:0000122~negative regulation of transcription from RNA polymerase II promoter	12	2.63736	0.0568035	Shox2, Cdkn1C, Ctbp1, Sall4, Gsc, Msx1, Drap1, Pkig, Trim28, Id3, Myc, Sim2	377	231	13588	1.87233	1	0.521461	63.0528
Annotation Cluster 27	Enrichment Score: 1.6703087354662347
Category	Term	Count	%	PValue	Genes	List Total	Pop Hits	Pop Total	Fold Enrichment	Bonferroni	Benjamini	FDR
INTERPRO	IPR000308:14-3-3 protein	3	0.659341	0.0113775	Ywhag, Ywhah, Ywhae	432	7	17763	17.622	0.99992	0.407749	16.1658
SMART	SM00101:14_3_3	3	0.659341	0.011401	Ywhag, Ywhah, Ywhae	223	7	9131	17.5484	0.847488	0.313468	12.9808
UP_SEQ_FEATURE	site:Interaction with phosphoserine on interacting protein	3	0.659341	0.0146102	Ywhag, Ywhah, Ywhae	444	7	16021	15.4643	1	0.529734	21.1339
PIR_SUPERFAMILY	PIRSF000868:14-3-3 protein	3	0.659341	0.0158513	Ywhag, Ywhah, Ywhae	236	7	8136	14.7748	0.985039	0.75359	18.8789
PIR_SUPERFAMILY	PIRSF000868:14-3-3	3	0.659341	0.0158513	Ywhag, Ywhah, Ywhae	236	7	8136	14.7748	0.985039	0.75359	18.8789
KEGG_PATHWAY	mmu04722:Neurotrophin signaling pathway	9	1.97802	0.0565897	Akt1, Ywhag, Ywhah, Bax, Ngfrap1, Ngfr, Ywhae, Arhgdia, Pik3R2	185	130	5738	2.14728	0.999542	0.332831	49.3505
KEGG_PATHWAY	mmu04114:Oocyte meiosis	8	1.75824	0.0753917	Ppp2R1A, Ppp1Ca, Ywhag, Ywhah, Anapc13, Bub1, Ppp1Cb, Ywhae	185	115	5738	2.15765	0.999968	0.389029	59.9609
Annotation Cluster 28	Enrichment Score: 1.6535350028944928
Category	Term	Count	%	PValue	Genes	List Total	Pop Hits	Pop Total	Fold Enrichment	Bonferroni	Benjamini	FDR
SP_PIR_KEYWORDS	protein biosynthesis	10	2.1978	0.00779389	Eif4G1, Eif4G2, Yars, Eif4A2, Aars, Eprs, Eif2B2, Kars, Rps3, Mars	443	139	17854	2.89946	0.924971	0.0713252	10.0688
GOTERM_BP_FAT	GO:0006418~tRNA aminoacylation for protein translation	6	1.31868	0.00853567	Yars, Aars, Eprs, Tpr, Kars, Mars	377	46	13588	4.70119	1	0.176942	13.5799
GOTERM_BP_FAT	GO:0043039~tRNA aminoacylation	6	1.31868	0.00853567	Yars, Aars, Eprs, Tpr, Kars, Mars	377	46	13588	4.70119	1	0.176942	13.5799
GOTERM_BP_FAT	GO:0043038~amino acid activation	6	1.31868	0.00853567	Yars, Aars, Eprs, Tpr, Kars, Mars	377	46	13588	4.70119	1	0.176942	13.5799
GOTERM_MF_FAT	GO:0004812~aminoacyl-tRNA ligase activity	6	1.31868	0.00863564	Yars, Aars, Eprs, Tpr, Kars, Mars	354	48	13288	4.69209	0.987796	0.19772	11.7658
GOTERM_MF_FAT	GO:0016875~ligase activity, forming carbon-oxygen bonds	6	1.31868	0.00863564	Yars, Aars, Eprs, Tpr, Kars, Mars	354	48	13288	4.69209	0.987796	0.19772	11.7658
GOTERM_MF_FAT	GO:0016876~ligase activity, forming aminoacyl-tRNA and related compounds	6	1.31868	0.00863564	Yars, Aars, Eprs, Tpr, Kars, Mars	354	48	13288	4.69209	0.987796	0.19772	11.7658
GOTERM_BP_FAT	GO:0034660~ncRNA metabolic process	13	2.85714	0.01061	Yars, Pus1, Exosc7, Exosc4, Aars, Eprs, Ints1, Rrp9, Lin28B, Kars, Tpr, Imp4, Mars	377	202	13588	2.31956	1	0.19991	16.6073
SP_PIR_KEYWORDS	Aminoacyl-tRNA synthetase	5	1.0989	0.0153838	Yars, Aars, Eprs, Kars, Mars	443	39	17854	5.16699	0.994093	0.120402	18.9639
INTERPRO	IPR014729:Rossmann-like alpha/beta/alpha sandwich fold	5	1.0989	0.0156862	Yars, Eprs, Asns, Etfb, Mars	432	40	17763	5.13976	0.999998	0.462257	21.6226
GOTERM_BP_FAT	GO:0006412~translation	16	3.51648	0.032383	Yars, Aars, Eprs, Rps5, Kars, Rps3, Eif4G1, Eif4G2, Mrpl17, Eif4A2, Rpl8, Pelo, Tpr, Eif2B2, Mrpl43, Mars	377	319	13588	1.80777	1	0.391332	42.906
SP_PIR_KEYWORDS	trna-binding	3	0.659341	0.0342515	Yars, Aars, Mars	443	12	17854	10.0756	0.99999	0.192352	37.6685
KEGG_PATHWAY	mmu00970:Aminoacyl-tRNA biosynthesis	5	1.0989	0.0444206	Yars, Aars, Eprs, Kars, Mars	185	42	5738	3.69241	0.997516	0.312613	41.1736
UP_SEQ_FEATURE	short sequence motif:"KMSKS" region	3	0.659341	0.0631761	Yars, Eprs, Mars	444	15	16021	7.21667	1	0.853911	65.1012
UP_SEQ_FEATURE	short sequence motif:"HIGH" region	3	0.659341	0.0789454	Yars, Eprs, Mars	444	17	16021	6.36765	1	0.906031	73.4612
GOTERM_BP_FAT	GO:0006399~tRNA metabolic process	7	1.53846	0.0935037	Yars, Pus1, Aars, Eprs, Tpr, Kars, Mars	377	113	13588	2.23272	1	0.589263	81.2015
SP_PIR_KEYWORDS	ligase	9	1.97802	0.422637	Yars, Ube2M, Aars, Eprs, Asns, Stub1, Mthfd1L, Kars, Mars	443	290	17854	1.25077	1	0.849514	99.9419
Annotation Cluster 29	Enrichment Score: 1.5946569619207605
Category	Term	Count	%	PValue	Genes	List Total	Pop Hits	Pop Total	Fold Enrichment	Bonferroni	Benjamini	FDR
SMART	SM00353:HLH	9	1.97802	0.00555918	Myf5, Id3, Myc, Tcf3, Tcf12, Tcf15, Sim2, Mycn, Twist1	223	111	9131	3.31996	0.599183	0.262692	6.53635
INTERPRO	IPR001092:Basic helix-loop-helix dimerisation region bHLH	9	1.97802	0.00565148	Myf5, Id3, Myc, Tcf3, Tcf12, Tcf15, Sim2, Mycn, Twist1	432	111	17763	3.3339	0.990628	0.345935	8.36293
UP_SEQ_FEATURE	domain:Helix-loop-helix motif	9	1.97802	0.0107331	Myf5, Id3, Myc, Tcf3, Tcf12, Tcf15, Sim2, Mycn, Twist1	444	109	16021	2.97936	0.999997	0.454386	15.9764
INTERPRO	IPR011598:Helix-loop-helix DNA-binding	7	1.53846	0.0172524	Myf5, Myc, Tcf3, Tcf12, Tcf15, Mycn, Twist1	432	85	17763	3.38619	0.999999	0.478903	23.5225
UP_SEQ_FEATURE	DNA-binding region:Basic motif	8	1.75824	0.135401	Myf5, Myc, Tcf3, Tcf12, Tcf15, Sim2, Mycn, Twist1	444	154	16021	1.87446	1	0.973999	90.4336
UP_SEQ_FEATURE	domain:Leucine-zipper	5	1.0989	0.343312	E2F4, Myc, Tcf3, Tcf12, Mycn	444	107	16021	1.68614	1	0.999878	99.8868
Annotation Cluster 30	Enrichment Score: 1.58399905590628
Category	Term	Count	%	PValue	Genes	List Total	Pop Hits	Pop Total	Fold Enrichment	Bonferroni	Benjamini	FDR
GOTERM_BP_FAT	GO:0033365~protein localization in organelle	9	1.97802	0.00542032	Xpo1, Grpel1, Macf1, Ipo7, Fgf9, Tomm40, Timm13, Tpr, Kpna3	377	97	13588	3.34414	0.999955	0.134922	8.83838
GOTERM_BP_FAT	GO:0017038~protein import	8	1.75824	0.00754291	Xpo1, Grpel1, Ipo7, Fgf9, Tomm40, Timm13, Tpr, Kpna3	377	82	13588	3.51634	0.999999	0.165506	12.0948
GOTERM_BP_FAT	GO:0007005~mitochondrion organization	8	1.75824	0.0179805	Akt1, Grpel1, Bax, Mrpl17, Tomm40, Timm50, Timm13, Myc	377	97	13588	2.97257	1	0.293734	26.5759
GOTERM_BP_FAT	GO:0006839~mitochondrial transport	5	1.0989	0.0282556	Grpel1, Kif5B, Bax, Tomm40, Timm13	377	42	13588	4.29077	1	0.367831	38.6148
GOTERM_BP_FAT	GO:0006626~protein targeting to mitochondrion	3	0.659341	0.12282	Grpel1, Tomm40, Timm13	377	22	13588	4.91488	1	0.649481	89.259
GOTERM_BP_FAT	GO:0070585~protein localization in mitochondrion	3	0.659341	0.12282	Grpel1, Tomm40, Timm13	377	22	13588	4.91488	1	0.649481	89.259
Annotation Cluster 31	Enrichment Score: 1.5220628467692228
Category	Term	Count	%	PValue	Genes	List Total	Pop Hits	Pop Total	Fold Enrichment	Bonferroni	Benjamini	FDR
INTERPRO	IPR011545:DNA/RNA helicase, DEAD/DEAH box type, N-terminal	7	1.53846	0.00209191	Dhx9, Ddx39, Ddx17, Ddx3X, Eif4A2, Dhx36, Ddx54	432	55	17763	5.23321	0.821923	0.218473	3.17543
INTERPRO	IPR014014:RNA helicase, DEAD-box type, Q motif	5	1.0989	0.00987709	Ddx39, Ddx17, Ddx3X, Eif4A2, Ddx54	432	35	17763	5.87401	0.99972	0.381914	14.1835
UP_SEQ_FEATURE	short sequence motif:Q motif	5	1.0989	0.0125166	Ddx39, Ddx17, Ddx3X, Eif4A2, Ddx54	444	33	16021	5.46717	1	0.490847	18.3869
GOTERM_MF_FAT	GO:0070035~purine NTP-dependent helicase activity	7	1.53846	0.0267958	Dhx9, Ddx39, Ddx17, Ddx3X, Eif4A2, Dhx36, Ddx54	354	86	13288	3.05531	0.999999	0.400126	32.4301
GOTERM_MF_FAT	GO:0008026~ATP-dependent helicase activity	7	1.53846	0.0267958	Dhx9, Ddx39, Ddx17, Ddx3X, Eif4A2, Dhx36, Ddx54	354	86	13288	3.05531	0.999999	0.400126	32.4301
SP_PIR_KEYWORDS	helicase	8	1.75824	0.0297305	Dhx9, Ddx39, Ddx17, Ddx3X, Eif4A2, Dhx36, Ruvbl2, Ddx54	443	120	17854	2.68683	0.999954	0.177892	33.5924
UP_SEQ_FEATURE	domain:Helicase C-terminal	7	1.53846	0.0318188	Dhx9, Ddx39, Ddx17, Ddx3X, Eif4A2, Dhx36, Ddx54	444	86	16021	2.93702	1	0.731426	40.6441
SMART	SM00490:HELICc	7	1.53846	0.0333372	Dhx9, Ddx39, Ddx17, Ddx3X, Eif4A2, Dhx36, Ddx54	223	99	9131	2.89519	0.996153	0.426531	33.7101
INTERPRO	IPR014021:Helicase, superfamily 1 and 2, ATP-binding	7	1.53846	0.0334614	Dhx9, Ddx39, Ddx17, Ddx3X, Eif4A2, Dhx36, Ddx54	432	99	17763	2.90734	1	0.583711	40.812
INTERPRO	IPR001650:DNA/RNA helicase, C-terminal	7	1.53846	0.0348995	Dhx9, Ddx39, Ddx17, Ddx3X, Eif4A2, Dhx36, Ddx54	432	100	17763	2.87826	1	0.577224	42.1547
UP_SEQ_FEATURE	domain:Helicase ATP-binding	7	1.53846	0.0367496	Dhx9, Ddx39, Ddx17, Ddx3X, Eif4A2, Dhx36, Ddx54	444	89	16021	2.83801	1	0.759251	45.3369
INTERPRO	IPR000629:RNA helicase, ATP-dependent, DEAD-box, conserved site	4	0.879121	0.0385983	Ddx17, Ddx3X, Eif4A2, Ddx54	432	31	17763	5.30556	1	0.583814	45.4781
SMART	SM00487:DEXDc	7	1.53846	0.0393241	Dhx9, Ddx39, Ddx17, Ddx3X, Eif4A2, Dhx36, Ddx54	223	103	9131	2.78275	0.998611	0.422058	38.5204
INTERPRO	IPR014001:DEAD-like helicase, N-terminal	7	1.53846	0.0394507	Dhx9, Ddx39, Ddx17, Ddx3X, Eif4A2, Dhx36, Ddx54	432	103	17763	2.79443	1	0.57276	46.2183
UP_SEQ_FEATURE	short sequence motif:DEAD box	4	0.879121	0.049116	Ddx17, Ddx3X, Eif4A2, Ddx54	444	30	16021	4.81111	1	0.807834	55.6216
GOTERM_MF_FAT	GO:0004386~helicase activity	8	1.75824	0.0563696	Dhx9, Ddx39, Ddx17, Ddx3X, Eif4A2, Dhx36, Ruvbl2, Ddx54	354	129	13288	2.32786	1	0.559012	56.716
GOTERM_MF_FAT	GO:0042623~ATPase activity, coupled	11	2.41758	0.0742975	Atp5D, Dhx9, Ddx39, Ddx17, Ddx3X, Atp5B, Eif4A2, Dhx36, Atp5A1, Ddx54, Asna1	354	223	13288	1.85159	1	0.624865	67.1831
GOTERM_MF_FAT	GO:0016887~ATPase activity	12	2.63736	0.129456	Atp5D, Abce1, Dhx9, Ddx39, Ddx17, Ddx3X, Atp5B, Eif4A2, Dhx36, Atp5A1, Ddx54, Asna1	354	281	13288	1.60299	1	0.762431	86.4785
Annotation Cluster 32	Enrichment Score: 1.5123195202766357
Category	Term	Count	%	PValue	Genes	List Total	Pop Hits	Pop Total	Fold Enrichment	Bonferroni	Benjamini	FDR
INTERPRO	IPR000886:Endoplasmic reticulum, targeting sequence	7	1.53846	0.000561597	Hsp90B1, Sdf2L1, Pdia6, Calr, Prkcsh, Serpinh1, Olfm1	432	43	17763	6.69364	0.370536	0.109277	0.861908
UP_SEQ_FEATURE	short sequence motif:Prevents secretion from ER	8	1.75824	0.00116253	Hsp90B1, Sdf2L1, Pdia6, Calr, Prkcsh, Serpinh1, Olfm1, Fkbp2	444	59	16021	4.89266	0.746255	0.17792	1.8589
GOTERM_CC_FAT	GO:0005788~endoplasmic reticulum lumen	6	1.31868	0.0280905	Hsp90B1, Sdf2L1, Pdia6, Calr, Serpinh1, Olfm1	298	72	12504	3.49664	0.999945	0.23272	32.2052
GOTERM_CC_FAT	GO:0044432~endoplasmic reticulum part	9	1.97802	0.184856	Fkbp8, Hsp90B1, Sdf2L1, Pdia6, Dpm3, Calr, Prkcsh, Serpinh1, Olfm1	298	231	12504	1.63479	1	0.690202	93.8469
SP_PIR_KEYWORDS	endoplasmic reticulum	19	4.17582	0.402532	Mogat2, Cnbp, Hsd17B12, Pdia6, Tmem132A, Calr, Prkcsh, Ergic1, Serpinh1, Hsp90B1, Sdf2L1, Lrrc59, Trappc5, Dpm3, Asna1, Ahsa1, Olfm1, Fkbp2, Mest	443	678	17854	1.12942	1	0.836942	99.9075
GOTERM_CC_FAT	GO:0005783~endoplasmic reticulum	20	4.3956	0.618102	Mogat2, Cnbp, Fkbp8, Hsd17B12, Pdia6, Tmem132A, Calr, Prkcsh, Ergic1, Serpinh1, Hsp90B1, Sdf2L1, Bax, Emid2, Lrrc59, Trappc5, Dpm3, Ahsa1, Olfm1, Fkbp2	298	838	12504	1.00143	1	0.961087	99.9998
Annotation Cluster 33	Enrichment Score: 1.4981017505777976
Category	Term	Count	%	PValue	Genes	List Total	Pop Hits	Pop Total	Fold Enrichment	Bonferroni	Benjamini	FDR
GOTERM_MF_FAT	GO:0016667~oxidoreductase activity, acting on sulfur group of donors	7	1.53846	0.000203298	Glrx5, Nxn, Txn2, Dld, Gfer, Txnrd1, Sh3Bgrl3	354	33	13288	7.96234	0.0981311	0.00735043	0.293011
GOTERM_BP_FAT	GO:0045454~cell redox homeostasis	7	1.53846	0.00719434	Glrx5, Nxn, Txn2, Dld, Pdia6, Txnrd1, Sh3Bgrl3	377	62	13588	4.06931	0.999998	0.162337	11.5676
GOTERM_MF_FAT	GO:0016668~oxidoreductase activity, acting on sulfur group of donors, NAD or NADP as acceptor	3	0.659341	0.00983458	Nxn, Dld, Txnrd1	354	6	13288	18.7684	0.9934	0.212649	13.2934
GOTERM_MF_FAT	GO:0015035~protein disulfide oxidoreductase activity	3	0.659341	0.0330337	Glrx5, Txn2, Sh3Bgrl3	354	11	13288	10.2373	1	0.433806	38.4187
GOTERM_MF_FAT	GO:0015036~disulfide oxidoreductase activity	3	0.659341	0.0588359	Glrx5, Txn2, Sh3Bgrl3	354	15	13288	7.50734	1	0.565057	58.3203
SP_PIR_KEYWORDS	Redox-active center	4	0.879121	0.0715392	Txn2, Dld, Pdia6, Txnrd1	443	39	17854	4.13359	1	0.336009	63.46
INTERPRO	IPR012335:Thioredoxin fold	6	1.31868	0.115581	Sh3Bgrl, Glrx5, Nxn, Txn2, Pdia6, Sh3Bgrl3	432	106	17763	2.32744	1	0.873238	84.9331
INTERPRO	IPR017937:Thioredoxin, conserved site	3	0.659341	0.122346	Nxn, Txn2, Pdia6	432	25	17763	4.93417	1	0.883597	86.6146
GOTERM_MF_FAT	GO:0009055~electron carrier activity	9	1.97802	0.170077	Abce1, Glrx5, Txn2, Cyc1, Dld, Cyp26B1, Txnrd1, Sh3Bgrl3, Etfb	354	202	13288	1.67243	1	0.838168	93.2156
INTERPRO	IPR017936:Thioredoxin-like	3	0.659341	0.217189	Nxn, Txn2, Pdia6	432	36	17763	3.4265	1	0.974486	97.7023
Annotation Cluster 34	Enrichment Score: 1.4810523434589151
Category	Term	Count	%	PValue	Genes	List Total	Pop Hits	Pop Total	Fold Enrichment	Bonferroni	Benjamini	FDR
INTERPRO	IPR016021:MIF4-like, type 1/2/3	3	0.659341	0.0330085	Eif4G1, Eif4G2, Upf2	432	12	17763	10.2795	1	0.590245	40.3832
INTERPRO	IPR003890:MIF4G-like, type 3	3	0.659341	0.0330085	Eif4G1, Eif4G2, Upf2	432	12	17763	10.2795	1	0.590245	40.3832
SMART	SM00543:MIF4G	3	0.659341	0.0330819	Eif4G1, Eif4G2, Upf2	223	12	9131	10.2365	0.995983	0.458289	33.4975
Annotation Cluster 35	Enrichment Score: 1.4684706412767656
Category	Term	Count	%	PValue	Genes	List Total	Pop Hits	Pop Total	Fold Enrichment	Bonferroni	Benjamini	FDR
GOTERM_BP_FAT	GO:0007005~mitochondrion organization	8	1.75824	0.0179805	Akt1, Grpel1, Bax, Mrpl17, Tomm40, Timm50, Timm13, Myc	377	97	13588	2.97257	1	0.293734	26.5759
GOTERM_BP_FAT	GO:0008637~apoptotic mitochondrial changes	4	0.879121	0.0308015	Akt1, Bax, Timm50, Myc	377	25	13588	5.76679	1	0.381041	41.2962
GOTERM_BP_FAT	GO:0001836~release of cytochrome c from mitochondria	3	0.659341	0.0709926	Bax, Timm50, Myc	377	16	13588	6.75796	1	0.555741	71.4569
Annotation Cluster 36	Enrichment Score: 1.440751607989052
Category	Term	Count	%	PValue	Genes	List Total	Pop Hits	Pop Total	Fold Enrichment	Bonferroni	Benjamini	FDR
INTERPRO	IPR019782:WD40 repeat 2	13	2.85714	0.00615988	Fzr1, Rrp9, Llgl1, Wsb1, Phip, Fbxw8, Wdr18, Gnb2, Grwd1, Gnb1, Aamp, Gnb2L1, Bub3	432	214	17763	2.49783	0.993851	0.345764	9.08226
INTERPRO	IPR019781:WD40 repeat, subgroup	13	2.85714	0.0124882	Fzr1, Rrp9, Llgl1, Wsb1, Phip, Fbxw8, Wdr18, Gnb2, Grwd1, Gnb1, Aamp, Gnb2L1, Bub3	432	235	17763	2.27462	0.999968	0.404143	17.6054
INTERPRO	IPR017986:WD40 repeat, region	12	2.63736	0.0235343	Wsb1, Phip, Fzr1, Fbxw8, Wdr18, Gnb2, Gnb1, Grwd1, Aamp, Rrp9, Gnb2L1, Bub3	432	228	17763	2.16411	1	0.558542	30.7184
INTERPRO	IPR019775:WD40 repeat, conserved site	13	2.85714	0.0241159	Fzr1, Rrp9, Llgl1, Wsb1, Phip, Fbxw8, Wdr18, Gnb2, Grwd1, Gnb1, Aamp, Gnb2L1, Bub3	432	258	17763	2.07184	1	0.552735	31.3516
SMART	SM00320:WD40	13	2.85714	0.0242167	Fzr1, Rrp9, Llgl1, Wsb1, Phip, Fbxw8, Wdr18, Gnb2, Grwd1, Gnb1, Aamp, Gnb2L1, Bub3	223	259	9131	2.05521	0.982054	0.488327	25.715
INTERPRO	IPR001680:WD40 repeat	13	2.85714	0.0247397	Fzr1, Rrp9, Llgl1, Wsb1, Phip, Fbxw8, Wdr18, Gnb2, Grwd1, Gnb1, Aamp, Gnb2L1, Bub3	432	259	17763	2.06384	1	0.53444	32.0246
UP_SEQ_FEATURE	repeat:WD 5	12	2.63736	0.0249638	Wsb1, Phip, Fzr1, Fbxw8, Wdr18, Gnb2, Gnb1, Grwd1, Rrp9, Gnb2L1, Llgl1, Bub3	444	202	16021	2.14356	1	0.682216	33.4893
SP_PIR_KEYWORDS	wd repeat	13	2.85714	0.0308362	Fzr1, Rrp9, Llgl1, Wsb1, Phip, Fbxw8, Wdr18, Gnb2, Grwd1, Gnb1, Aamp, Gnb2L1, Bub3	443	263	17854	1.99214	0.999969	0.177669	34.6115
UP_SEQ_FEATURE	repeat:WD 4	12	2.63736	0.0401241	Wsb1, Phip, Fzr1, Fbxw8, Wdr18, Gnb2, Gnb1, Grwd1, Rrp9, Gnb2L1, Llgl1, Bub3	444	218	16021	1.98624	1	0.778824	48.3454
UP_SEQ_FEATURE	repeat:WD 3	12	2.63736	0.0564105	Wsb1, Phip, Fzr1, Fbxw8, Wdr18, Gnb2, Gnb1, Grwd1, Rrp9, Gnb2L1, Llgl1, Bub3	444	231	16021	1.87446	1	0.834951	60.8058
UP_SEQ_FEATURE	repeat:WD 2	12	2.63736	0.0615778	Wsb1, Phip, Fzr1, Fbxw8, Wdr18, Gnb2, Gnb1, Grwd1, Rrp9, Gnb2L1, Llgl1, Bub3	444	235	16021	1.84255	1	0.853587	64.1283
UP_SEQ_FEATURE	repeat:WD 1	12	2.63736	0.0615778	Wsb1, Phip, Fzr1, Fbxw8, Wdr18, Gnb2, Gnb1, Grwd1, Rrp9, Gnb2L1, Llgl1, Bub3	444	235	16021	1.84255	1	0.853587	64.1283
INTERPRO	IPR015943:WD40/YVTN repeat-like	13	2.85714	0.0687672	Fzr1, Rrp9, Llgl1, Wsb1, Phip, Fbxw8, Wdr18, Gnb2, Grwd1, Gnb1, Aamp, Gnb2L1, Bub3	432	305	17763	1.75257	1	0.744689	66.6421
UP_SEQ_FEATURE	repeat:WD 7	7	1.53846	0.129479	Phip, Fzr1, Gnb2, Gnb1, Rrp9, Gnb2L1, Llgl1	444	124	16021	2.03696	1	0.973562	89.32
UP_SEQ_FEATURE	repeat:WD 6	8	1.75824	0.159065	Phip, Fzr1, Wdr18, Gnb2, Gnb1, Rrp9, Gnb2L1, Llgl1	444	161	16021	1.79296	1	0.983177	93.8859
Annotation Cluster 37	Enrichment Score: 1.4328054204105107
Category	Term	Count	%	PValue	Genes	List Total	Pop Hits	Pop Total	Fold Enrichment	Bonferroni	Benjamini	FDR
GOTERM_MF_FAT	GO:0035258~steroid hormone receptor binding	3	0.659341	0.00983458	Ywhah, Fkbp4, Ddx54	354	6	13288	18.7684	0.9934	0.212649	13.2934
GOTERM_MF_FAT	GO:0035257~nuclear hormone receptor binding	4	0.879121	0.0606915	Ywhah, Nup62, Fkbp4, Ddx54	354	34	13288	4.41609	1	0.566999	59.4908
GOTERM_MF_FAT	GO:0051427~hormone receptor binding	4	0.879121	0.0842753	Ywhah, Nup62, Fkbp4, Ddx54	354	39	13288	3.84992	1	0.646579	71.9346
Annotation Cluster 38	Enrichment Score: 1.4314524350248234
Category	Term	Count	%	PValue	Genes	List Total	Pop Hits	Pop Total	Fold Enrichment	Bonferroni	Benjamini	FDR
GOTERM_BP_FAT	GO:0030199~collagen fibril organization	4	0.879121	0.0193126	Lmx1B, Tgfbr1, Col2A1, Serpinh1	377	21	13588	6.86523	1	0.306602	28.2533
GOTERM_BP_FAT	GO:0030198~extracellular matrix organization	8	1.75824	0.0219452	Lmx1B, Smoc1, Tgfbr1, Myf5, Hsd17B12, Col2A1, Serpinh1, Tgfb2	377	101	13588	2.85485	1	0.322161	31.4629
GOTERM_BP_FAT	GO:0043062~extracellular structure organization	8	1.75824	0.119802	Lmx1B, Smoc1, Tgfbr1, Myf5, Hsd17B12, Col2A1, Serpinh1, Tgfb2	377	149	13588	1.93516	1	0.642929	88.6122
Annotation Cluster 39	Enrichment Score: 1.3911726149655328
Category	Term	Count	%	PValue	Genes	List Total	Pop Hits	Pop Total	Fold Enrichment	Bonferroni	Benjamini	FDR
SMART	SM00213:UBQ	5	1.0989	0.0268379	Sumo3, Midn, Ubfd1, Nedd8, Sf3A1	223	47	9131	4.35598	0.988456	0.471316	28.0988
INTERPRO	IPR000626:Ubiquitin	5	1.0989	0.0268434	Sumo3, Midn, Ubfd1, Nedd8, Sf3A1	432	47	17763	4.37426	1	0.551013	34.2494
INTERPRO	IPR019955:Ubiquitin supergroup	5	1.0989	0.0327697	Sumo3, Midn, Ubfd1, Nedd8, Sf3A1	432	50	17763	4.11181	1	0.599545	40.156
UP_SEQ_FEATURE	domain:Ubiquitin-like	4	0.879121	0.115412	Sumo3, Midn, Ubfd1, Sf3A1	444	43	16021	3.35659	1	0.965349	86.1684
Annotation Cluster 40	Enrichment Score: 1.3853247681253638
Category	Term	Count	%	PValue	Genes	List Total	Pop Hits	Pop Total	Fold Enrichment	Bonferroni	Benjamini	FDR
GOTERM_BP_FAT	GO:0002053~positive regulation of mesenchymal cell proliferation	5	1.0989	0.00284285	Shox2, Arhgap5, Fgf9, Gas1, Tbx18	377	22	13588	8.19146	0.994691	0.0924488	4.73147
GOTERM_BP_FAT	GO:0010464~regulation of mesenchymal cell proliferation	5	1.0989	0.00336719	Shox2, Arhgap5, Fgf9, Gas1, Tbx18	377	23	13588	7.83531	0.997983	0.0952512	5.5808
GOTERM_BP_FAT	GO:0045880~positive regulation of smoothened signaling pathway	3	0.659341	0.0146259	Shox2, Fgf9, Gas1	377	7	13588	15.4468	1	0.252866	22.1866
GOTERM_BP_FAT	GO:0008589~regulation of smoothened signaling pathway	4	0.879121	0.0219131	Shox2, Fgf9, Gas1, Runx2	377	22	13588	6.55317	1	0.324298	31.4246
GOTERM_BP_FAT	GO:0050678~regulation of epithelial cell proliferation	6	1.31868	0.0299893	Fgf9, Phb2, Bax, Gas1, Tbx18, Etv4	377	63	13588	3.43261	1	0.383052	40.453
GOTERM_BP_FAT	GO:0050679~positive regulation of epithelial cell proliferation	3	0.659341	0.211293	Fgf9, Gas1, Tbx18	377	31	13588	3.48798	1	0.787484	98.2425
GOTERM_BP_FAT	GO:0010647~positive regulation of cell communication	6	1.31868	0.603191	Shox2, Fkbp8, Gria2, Nup62, Fgf9, Gas1	377	189	13588	1.1442	1	0.987089	100
GOTERM_BP_FAT	GO:0009967~positive regulation of signal transduction	5	1.0989	0.705096	Shox2, Fkbp8, Nup62, Fgf9, Gas1	377	172	13588	1.04775	1	0.995604	100
Annotation Cluster 41	Enrichment Score: 1.3845946779818643
Category	Term	Count	%	PValue	Genes	List Total	Pop Hits	Pop Total	Fold Enrichment	Bonferroni	Benjamini	FDR
GOTERM_BP_FAT	GO:0007059~chromosome segregation	7	1.53846	0.00838066	Nipbl, Usp9X, Incenp, Top2A, Stag2, Bub3, Smc4	377	64	13588	3.94214	1	0.175986	13.3496
GOTERM_BP_FAT	GO:0000070~mitotic sister chromatid segregation	3	0.659341	0.0873346	Nipbl, Bub3, Smc4	377	18	13588	6.00707	1	0.587286	78.9004
GOTERM_BP_FAT	GO:0000819~sister chromatid segregation	3	0.659341	0.0958852	Nipbl, Bub3, Smc4	377	19	13588	5.69091	1	0.593568	82.0249
Annotation Cluster 42	Enrichment Score: 1.373187280801713
Category	Term	Count	%	PValue	Genes	List Total	Pop Hits	Pop Total	Fold Enrichment	Bonferroni	Benjamini	FDR
SP_PIR_KEYWORDS	cell cycle control	5	1.0989	0.00131025	Cdkn1C, Ccnd1, Ccnd3, Ccnd2, Cdk4	443	20	17854	10.0756	0.352073	0.0143618	1.76257
INTERPRO	IPR015451:Cyclin D	3	0.659341	0.00173384	Ccnd1, Ccnd3, Ccnd2	432	3	17763	41.1181	0.760673	0.21205	2.63866
KEGG_PATHWAY	mmu04115:p53 signaling pathway	7	1.53846	0.0225782	Ccnd1, Ccnd3, Ccnd2, Bax, Chek1, Cdk4, Sesn3	185	69	5738	3.14657	0.950928	0.206961	23.4074
INTERPRO	IPR014400:Cyclin, A/B/D/E	3	0.659341	0.0232354	Ccnd1, Ccnd3, Ccnd2	432	10	17763	12.3354	1	0.569262	30.3908
PIR_SUPERFAMILY	PIRSF001771:cyclin, A/B/D/E types	3	0.659341	0.0261589	Ccnd1, Ccnd3, Ccnd2	236	9	8136	11.4915	0.999062	0.824978	29.3264
SP_PIR_KEYWORDS	cyclin	5	1.0989	0.0306308	Cdkn1C, Ccnd1, Ccnd3, Ccnd2, Cdk4	443	48	17854	4.19818	0.999966	0.179651	34.4233
PIR_SUPERFAMILY	PIRSF001771:Cyclin_A_B_D_E	3	0.659341	0.0320846	Ccnd1, Ccnd3, Ccnd2	236	10	8136	10.3424	0.999812	0.820093	34.7549
INTERPRO	IPR004367:Cyclin, C-terminal	3	0.659341	0.0500724	Ccnd1, Ccnd3, Ccnd2	432	15	17763	8.22361	1	0.652924	54.6874
BIOCARTA	m_cellcyclePathway:Cyclins and Cell Cycle Regulation	4	0.879121	0.0745745	Ccnd1, Ccnd3, Ccnd2, Cdk4	52	23	1171	3.91639	0.999816	0.98645	58.401
INTERPRO	IPR006671:Cyclin, N-terminal	3	0.659341	0.138794	Ccnd1, Ccnd3, Ccnd2	432	27	17763	4.56867	1	0.91056	89.9995
INTERPRO	IPR006670:Cyclin	3	0.659341	0.190479	Ccnd1, Ccnd3, Ccnd2	432	33	17763	3.73801	1	0.962571	96.1467
INTERPRO	IPR013763:Cyclin-related	3	0.659341	0.190479	Ccnd1, Ccnd3, Ccnd2	432	33	17763	3.73801	1	0.962571	96.1467
SMART	SM00385:CYCLIN	3	0.659341	0.190993	Ccnd1, Ccnd3, Ccnd2	223	33	9131	3.72238	1	0.870577	92.3467
KEGG_PATHWAY	mmu04630:Jak-STAT signaling pathway	6	1.31868	0.541789	Akt1, Ccnd1, Ccnd3, Ccnd2, Myc, Pik3R2	185	152	5738	1.22432	1	0.888288	99.989
Annotation Cluster 43	Enrichment Score: 1.347281549158996
Category	Term	Count	%	PValue	Genes	List Total	Pop Hits	Pop Total	Fold Enrichment	Bonferroni	Benjamini	FDR
GOTERM_MF_FAT	GO:0016564~transcription repressor activity	13	2.85714	0.0107911	Cops2, Ctbp1, Bclaf1, Ctbp2, Trim28, Msx1, Casp8Ap2, Drap1, Phb2, Trps1, Bcl11A, Ddx54, Sim2	354	211	13288	2.31269	0.995961	0.221612	14.4945
GOTERM_MF_FAT	GO:0003714~transcription corepressor activity	6	1.31868	0.0423532	Cops2, Ctbp2, Casp8Ap2, Drap1, Bcl11A, Ddx54	354	72	13288	3.12806	1	0.486339	46.4517
GOTERM_MF_FAT	GO:0008134~transcription factor binding	13	2.85714	0.0832415	Cops2, Ctbp1, Ctbp2, Pus1, Trim28, Casp8Ap2, Nup62, Drap1, Bcl11A, Rbm39, Id3, Ddx54, Tcf3	354	288	13288	1.69437	1	0.650486	71.4739
GOTERM_MF_FAT	GO:0003712~transcription cofactor activity	9	1.97802	0.107296	Cops2, Ctbp2, Casp8Ap2, Pus1, Drap1, Trim28, Bcl11A, Rbm39, Ddx54	354	180	13288	1.87684	1	0.722321	80.565
Annotation Cluster 44	Enrichment Score: 1.3377172407175695
Category	Term	Count	%	PValue	Genes	List Total	Pop Hits	Pop Total	Fold Enrichment	Bonferroni	Benjamini	FDR
GOTERM_MF_FAT	GO:0048407~platelet-derived growth factor binding	4	0.879121	0.00138608	Col1A2, Col2A1, Col1A1, Pdap1	354	9	13288	16.683	0.505703	0.0458884	1.98196
PIR_SUPERFAMILY	PIRSF002255:collagen alpha 1(I) chain	3	0.659341	0.00784248	Col1A2, Col2A1, Col1A1	236	5	8136	20.6847	0.873903	0.644898	9.79617
UP_SEQ_FEATURE	propeptide:N-terminal propeptide	3	0.659341	0.0106291	Col1A2, Col2A1, Col1A1	444	6	16021	18.0417	0.999997	0.467377	15.8339
GOTERM_CC_FAT	GO:0005583~fibrillar collagen	3	0.659341	0.0109121	Col1A2, Col2A1, Col1A1	298	7	12504	17.9827	0.977049	0.11822	13.9014
SP_PIR_KEYWORDS	triple helix	3	0.659341	0.0196184	Col1A2, Col2A1, Col1A1	443	9	17854	13.4342	0.998582	0.141456	23.5653
INTERPRO	IPR000885:Fibrillar collagen, C-terminal	3	0.659341	0.0279489	Col1A2, Col2A1, Col1A1	432	11	17763	11.214	1	0.55311	35.391
SMART	SM00038:COLFI	3	0.659341	0.0280103	Col1A2, Col2A1, Col1A1	223	11	9131	11.1671	0.990526	0.441447	29.1421
UP_SEQ_FEATURE	domain:Fibrillar collagen NC1	3	0.659341	0.0296383	Col1A2, Col2A1, Col1A1	444	10	16021	10.825	1	0.718283	38.4505
GOTERM_MF_FAT	GO:0019838~growth factor binding	6	1.31868	0.0423532	Tgfbr1, Col1A2, Col2A1, Col1A1, Ngfr, Pdap1	354	72	13288	3.12806	1	0.486339	46.4517
GOTERM_CC_FAT	GO:0044420~extracellular matrix part	6	1.31868	0.0678574	Smoc1, Col1A2, Col2A1, Sparc, Col1A1, Ntn1	298	92	12504	2.7365	1	0.415601	61.6567
GOTERM_CC_FAT	GO:0005581~collagen	3	0.659341	0.0737527	Col1A2, Col2A1, Col1A1	298	19	12504	6.62522	1	0.429219	64.8358
GOTERM_MF_FAT	GO:0005201~extracellular matrix structural constituent	3	0.659341	0.189005	Col1A2, Col2A1, Col1A1	354	30	13288	3.75367	1	0.860653	95.1371
SP_PIR_KEYWORDS	hydroxylation	4	0.879121	0.211048	Emid2, Col1A2, Col2A1, Col1A1	443	64	17854	2.51891	1	0.643854	95.9851
INTERPRO	IPR008160:Collagen triple helix repeat	4	0.879121	0.313786	Emid2, Col1A2, Col2A1, Col1A1	432	81	17763	2.03052	1	0.992158	99.6981
SP_PIR_KEYWORDS	collagen	4	0.879121	0.345132	Emid2, Col1A2, Col2A1, Col1A1	443	84	17854	1.91917	1	0.796537	99.679
KEGG_PATHWAY	mmu04512:ECM-receptor interaction	3	0.659341	0.75152	Col1A2, Col2A1, Col1A1	185	83	5738	1.12107	1	0.960224	100
Annotation Cluster 45	Enrichment Score: 1.3091220017621317
Category	Term	Count	%	PValue	Genes	List Total	Pop Hits	Pop Total	Fold Enrichment	Bonferroni	Benjamini	FDR
GOTERM_BP_FAT	GO:0001655~urogenital system development	10	2.1978	0.0202588	Irx3, Hoxc11, Osr1, Fkbp4, Bax, Tgfbr1, Hoxd13, Robo2, Sox9, Hoxd11	377	146	13588	2.46866	1	0.316408	29.4229
GOTERM_BP_FAT	GO:0001656~metanephros development	5	1.0989	0.0763541	Irx3, Hoxc11, Osr1, Robo2, Hoxd11	377	58	13588	3.10711	1	0.568251	74.1355
GOTERM_BP_FAT	GO:0001822~kidney development	7	1.53846	0.0764165	Irx3, Hoxc11, Osr1, Bax, Tgfbr1, Robo2, Hoxd11	377	107	13588	2.35792	1	0.566483	74.1652
Annotation Cluster 46	Enrichment Score: 1.2900698523906162
Category	Term	Count	%	PValue	Genes	List Total	Pop Hits	Pop Total	Fold Enrichment	Bonferroni	Benjamini	FDR
GOTERM_BP_FAT	GO:0014031~mesenchymal cell development	5	1.0989	0.0404807	Ednra, Aldh1A2, Trim28, Isl1, Sox9	377	47	13588	3.8343	1	0.445346	50.5176
GOTERM_BP_FAT	GO:0048762~mesenchymal cell differentiation	5	1.0989	0.0460899	Ednra, Aldh1A2, Trim28, Isl1, Sox9	377	49	13588	3.6778	1	0.474353	55.2185
GOTERM_BP_FAT	GO:0060485~mesenchyme development	5	1.0989	0.0490486	Ednra, Aldh1A2, Trim28, Isl1, Sox9	377	50	13588	3.60424	1	0.491077	57.5255
GOTERM_BP_FAT	GO:0014032~neural crest cell development	4	0.879121	0.0622423	Ednra, Aldh1A2, Isl1, Sox9	377	33	13588	4.36878	1	0.540643	66.5172
GOTERM_BP_FAT	GO:0014033~neural crest cell differentiation	4	0.879121	0.0622423	Ednra, Aldh1A2, Isl1, Sox9	377	33	13588	4.36878	1	0.540643	66.5172
Annotation Cluster 47	Enrichment Score: 1.2585596290467682
Category	Term	Count	%	PValue	Genes	List Total	Pop Hits	Pop Total	Fold Enrichment	Bonferroni	Benjamini	FDR
GOTERM_BP_FAT	GO:0006605~protein targeting	11	2.41758	0.00386234	Xpo1, Ywhag, Grpel1, Macf1, Ipo7, Fgf9, Tomm40, Timm13, Tpr, Kpna3, Ywhae	377	133	13588	2.98095	0.999192	0.10227	6.3763
GOTERM_BP_FAT	GO:0033365~protein localization in organelle	9	1.97802	0.00542032	Xpo1, Grpel1, Macf1, Ipo7, Fgf9, Tomm40, Timm13, Tpr, Kpna3	377	97	13588	3.34414	0.999955	0.134922	8.83838
GOTERM_BP_FAT	GO:0017038~protein import	8	1.75824	0.00754291	Xpo1, Grpel1, Ipo7, Fgf9, Tomm40, Timm13, Tpr, Kpna3	377	82	13588	3.51634	0.999999	0.165506	12.0948
GOTERM_BP_FAT	GO:0046907~intracellular transport	22	4.83516	0.00878004	Xpo1, Clta, Grpel1, Kif5B, Fgf9, Tomm40, Timm13, Ergic1, Ywhae, Ywhag, Ap1S1, Ywhah, Npc2, Macf1, Ipo7, Dynll2, Bax, Ranbp3, Rhob, Tpr, Ehd1, Kpna3	377	431	13588	1.83975	1	0.179536	13.9419
GOTERM_CC_FAT	GO:0046930~pore complex	6	1.31868	0.0295919	Xpo1, Nup62, Ipo7, Tomm40, Tpr, Kpna3	298	73	12504	3.44875	0.999967	0.238091	33.6201
GOTERM_BP_FAT	GO:0034613~cellular protein localization	15	3.2967	0.0389062	Xpo1, Grpel1, Clta, Fgf9, Tomm40, Timm13, Ywhae, Ap1S1, Ywhag, Ywhah, Macf1, Ipo7, Bax, Tpr, Kpna3	377	299	13588	1.80815	1	0.437261	49.1169
GOTERM_BP_FAT	GO:0070727~cellular macromolecule localization	15	3.2967	0.0408245	Xpo1, Grpel1, Clta, Fgf9, Tomm40, Timm13, Ywhae, Ap1S1, Ywhag, Ywhah, Macf1, Ipo7, Bax, Tpr, Kpna3	377	301	13588	1.79613	1	0.445645	50.8186
GOTERM_BP_FAT	GO:0006886~intracellular protein transport	14	3.07692	0.0438894	Xpo1, Grpel1, Clta, Fgf9, Tomm40, Timm13, Ywhae, Ap1S1, Ywhag, Ywhah, Macf1, Ipo7, Kpna3, Tpr	377	276	13588	1.82824	1	0.465072	53.4268
GOTERM_CC_FAT	GO:0005643~nuclear pore	5	1.0989	0.0512833	Xpo1, Nup62, Ipo7, Tpr, Kpna3	298	59	12504	3.55591	1	0.350263	51.2354
GOTERM_BP_FAT	GO:0008104~protein localization	29	6.37363	0.0682334	Xpo1, Clta, Grpel1, Chmp4B, Fgf9, Nedd8, Timm50, Timm13, Pfn1, Ap1S1, Macf1, Ranbp3, Rhob, Pex14, Tpr, Nasp, Tomm40, Ywhae, Ywhag, Ywhah, Gria2, Nup62, Arf1, Ipo7, Bax, Tmsb4X, Col1A1, Kpna3, Gnb2L1	377	753	13588	1.38809	1	0.55862	69.9787
GOTERM_BP_FAT	GO:0006606~protein import into nucleus	5	1.0989	0.0689317	Xpo1, Ipo7, Fgf9, Tpr, Kpna3	377	56	13588	3.21808	1	0.557918	70.3595
GOTERM_CC_FAT	GO:0005635~nuclear envelope	8	1.75824	0.0724949	Xpo1, Nup62, Lmnb1, Ipo7, Lmnb2, Tpr, Kpna3, Ccar1	298	153	12504	2.19397	1	0.430383	64.1787
GOTERM_BP_FAT	GO:0051170~nuclear import	5	1.0989	0.0763541	Xpo1, Ipo7, Fgf9, Tpr, Kpna3	377	58	13588	3.10711	1	0.568251	74.1355
GOTERM_BP_FAT	GO:0034504~protein localization in nucleus	5	1.0989	0.0882048	Xpo1, Ipo7, Fgf9, Tpr, Kpna3	377	61	13588	2.9543	1	0.581597	79.2404
GOTERM_BP_FAT	GO:0045184~establishment of protein localization	24	5.27473	0.144615	Xpo1, Clta, Grpel1, Chmp4B, Fgf9, Nasp, Tomm40, Timm50, Timm13, Ywhae, Ywhag, Ap1S1, Ywhah, Gria2, Arf1, Nup62, Macf1, Ipo7, Ranbp3, Rhob, Pex14, Col1A1, Tpr, Kpna3	377	656	13588	1.31863	1	0.695067	93.0016
GOTERM_BP_FAT	GO:0015031~protein transport	23	5.05495	0.194169	Xpo1, Clta, Grpel1, Chmp4B, Fgf9, Nasp, Tomm40, Timm50, Timm13, Ywhae, Ywhag, Ap1S1, Ywhah, Arf1, Nup62, Macf1, Ipo7, Ranbp3, Rhob, Pex14, Col1A1, Tpr, Kpna3	377	651	13588	1.27339	1	0.764122	97.4664
GOTERM_MF_FAT	GO:0008565~protein transporter activity	4	0.879121	0.255819	Xpo1, Ap1S1, Ipo7, Kpna3	354	66	13288	2.27495	1	0.900661	98.594
GOTERM_BP_FAT	GO:0006913~nucleocytoplasmic transport	5	1.0989	0.274959	Xpo1, Ipo7, Fgf9, Tpr, Kpna3	377	96	13588	1.87721	1	0.852599	99.5807
GOTERM_BP_FAT	GO:0051169~nuclear transport	5	1.0989	0.28734	Xpo1, Ipo7, Fgf9, Tpr, Kpna3	377	98	13588	1.8389	1	0.863493	99.6872
SP_PIR_KEYWORDS	protein transport	14	3.07692	0.352704	Xpo1, Chmp4B, Nasp, Tomm40, Timm50, Timm13, Ap1S1, Nup62, Arf1, Ipo7, Ranbp3, Rhob, Pex14, Kpna3	443	461	17854	1.22394	1	0.798033	99.7259
Annotation Cluster 48	Enrichment Score: 1.2429676360835873
Category	Term	Count	%	PValue	Genes	List Total	Pop Hits	Pop Total	Fold Enrichment	Bonferroni	Benjamini	FDR
KEGG_PATHWAY	mmu03030:DNA replication	6	1.31868	0.00476955	Pole4, Pold2, Mcm2, Fen1, Rnaseh2C, Mcm5	185	35	5738	5.31707	0.467987	0.0677188	5.42982
SP_PIR_KEYWORDS	dna replication	5	1.0989	0.159601	Nasp, Pold2, Supt16H, Mcm2, Mcm5	443	85	17854	2.37073	1	0.555416	90.5425
GOTERM_BP_FAT	GO:0006260~DNA replication	7	1.53846	0.245236	Top1, Nasp, Pold2, Supt16H, Mcm2, Fen1, Mcm5	377	152	13588	1.65985	1	0.825013	99.1689
Annotation Cluster 49	Enrichment Score: 1.2358159249029115
Category	Term	Count	%	PValue	Genes	List Total	Pop Hits	Pop Total	Fold Enrichment	Bonferroni	Benjamini	FDR
GOTERM_BP_FAT	GO:0001764~neuron migration	7	1.53846	0.0127755	Wnt2, Lmx1B, Bax, Top2B, Ywhae, Ntn1, Twist1	377	70	13588	3.60424	1	0.231159	19.6609
GOTERM_BP_FAT	GO:0006928~cell motion	18	3.95604	0.0268497	Lmx1B, Tgfbr1, Atp5B, Gas1, Isl1, Ntn1, Ywhae, Tgfb2, Wnt2, Nup62, Macf1, Lhx2, Bax, Robo2, Ngfr, Top2B, Etv4, Twist1	377	367	13588	1.76775	1	0.360541	37.0851
GOTERM_BP_FAT	GO:0016477~cell migration	12	2.63736	0.0704719	Wnt2, Lmx1B, Nup62, Atp5B, Bax, Tgfbr1, Isl1, Top2B, Ywhae, Ntn1, Tgfb2, Twist1	377	240	13588	1.80212	1	0.557331	71.1833
GOTERM_BP_FAT	GO:0051674~localization of cell	12	2.63736	0.165498	Wnt2, Lmx1B, Nup62, Atp5B, Bax, Tgfbr1, Isl1, Top2B, Ywhae, Ntn1, Tgfb2, Twist1	377	284	13588	1.52292	1	0.723434	95.4055
GOTERM_BP_FAT	GO:0048870~cell motility	12	2.63736	0.165498	Wnt2, Lmx1B, Nup62, Atp5B, Bax, Tgfbr1, Isl1, Top2B, Ywhae, Ntn1, Tgfb2, Twist1	377	284	13588	1.52292	1	0.723434	95.4055
Annotation Cluster 50	Enrichment Score: 1.2153203659811347
Category	Term	Count	%	PValue	Genes	List Total	Pop Hits	Pop Total	Fold Enrichment	Bonferroni	Benjamini	FDR
GOTERM_BP_FAT	GO:0006119~oxidative phosphorylation	7	1.53846	0.00436205	Atp5D, Uqcrc1, Atp5B, Ndufa7, Dld, Atp5A1, Atp5G3	377	56	13588	4.50531	0.999679	0.111562	7.17274
GOTERM_BP_FAT	GO:0015980~energy derivation by oxidation of organic compounds	7	1.53846	0.054419	Akt1, Ppp1Ca, Uqcrc1, Ndufa7, Dld, Ppp1Cb, Mdh2	377	98	13588	2.57446	1	0.513243	61.4298
GOTERM_BP_FAT	GO:0042773~ATP synthesis coupled electron transport	3	0.659341	0.0873346	Uqcrc1, Ndufa7, Dld	377	18	13588	6.00707	1	0.587286	78.9004
GOTERM_BP_FAT	GO:0022904~respiratory electron transport chain	3	0.659341	0.180919	Uqcrc1, Ndufa7, Dld	377	28	13588	3.86169	1	0.744646	96.6556
GOTERM_BP_FAT	GO:0045333~cellular respiration	4	0.879121	0.223504	Uqcrc1, Ndufa7, Dld, Mdh2	377	59	13588	2.44356	1	0.80134	98.6525
Annotation Cluster 51	Enrichment Score: 1.2126334630797395
Category	Term	Count	%	PValue	Genes	List Total	Pop Hits	Pop Total	Fold Enrichment	Bonferroni	Benjamini	FDR
SMART	SM00360:RRM	11	2.41758	0.0341552	Raly, Rbpms, Sfrs4, Tia1, Ptbp1, Sfrs9, Ssb, Rbm39, Ncl, Matr3, Sfrs2	223	212	9131	2.12457	0.996652	0.404362	34.3871
INTERPRO	IPR000504:RNA recognition motif, RNP-1	11	2.41758	0.0346109	Raly, Rbpms, Sfrs4, Tia1, Ptbp1, Sfrs9, Ssb, Rbm39, Ncl, Matr3, Sfrs2	432	212	17763	2.13348	1	0.585023	41.8875
UP_SEQ_FEATURE	domain:RRM 2	7	1.53846	0.0350549	Sfrs4, Tia1, Ptbp1, Sfrs9, Rbm39, Ncl, Matr3	444	88	16021	2.87027	1	0.753991	43.7647
UP_SEQ_FEATURE	domain:RRM 1	7	1.53846	0.0350549	Sfrs4, Tia1, Ptbp1, Sfrs9, Rbm39, Ncl, Matr3	444	88	16021	2.87027	1	0.753991	43.7647
INTERPRO	IPR012677:Nucleotide-binding, alpha-beta plait	11	2.41758	0.0354959	Raly, Rbpms, Sfrs4, Tia1, Ptbp1, Sfrs9, Ssb, Rbm39, Ncl, Matr3, Sfrs2	432	213	17763	2.12347	1	0.572956	42.7031
UP_SEQ_FEATURE	domain:RRM 3	4	0.879121	0.121456	Tia1, Ptbp1, Rbm39, Ncl	444	44	16021	3.2803	1	0.968875	87.6167
UP_SEQ_FEATURE	domain:RRM	4	0.879121	0.51856	Raly, Rbpms, Ssb, Sfrs2	444	99	16021	1.45791	1	0.999999	99.9992
Annotation Cluster 52	Enrichment Score: 1.2029581790123296
Category	Term	Count	%	PValue	Genes	List Total	Pop Hits	Pop Total	Fold Enrichment	Bonferroni	Benjamini	FDR
GOTERM_BP_FAT	GO:0007548~sex differentiation	10	2.1978	0.0101024	Tcf7, Osr1, Fgf9, Fkbp4, Phb2, Bax, Sf1, Hoxd13, Eif2B2, Sox9	377	130	13588	2.7725	1	0.193253	15.8758
GOTERM_BP_FAT	GO:0046661~male sex differentiation	6	1.31868	0.0204027	Fgf9, Fkbp4, Bax, Sf1, Hoxd13, Sox9	377	57	13588	3.79394	1	0.315654	29.5991
GOTERM_BP_FAT	GO:0030238~male sex determination	3	0.659341	0.0419646	Fgf9, Sf1, Sox9	377	12	13588	9.01061	1	0.452368	51.8045
GOTERM_BP_FAT	GO:0046546~development of primary male sexual characteristics	5	1.0989	0.058537	Fgf9, Bax, Sf1, Hoxd13, Sox9	377	53	13588	3.40023	1	0.527599	64.192
GOTERM_BP_FAT	GO:0045137~development of primary sexual characteristics	7	1.53846	0.0685965	Osr1, Fgf9, Bax, Sf1, Hoxd13, Eif2B2, Sox9	377	104	13588	2.42593	1	0.558343	70.1772
GOTERM_BP_FAT	GO:0048608~reproductive structure development	8	1.75824	0.0693235	Osr1, Fgf9, Fkbp4, Bax, Sf1, Hoxd13, Eif2B2, Sox9	377	130	13588	2.218	1	0.557803	70.5711
GOTERM_BP_FAT	GO:0007530~sex determination	3	0.659341	0.0790301	Fgf9, Sf1, Sox9	377	17	13588	6.36043	1	0.57099	75.3821
GOTERM_BP_FAT	GO:0008584~male gonad development	4	0.879121	0.0925708	Fgf9, Bax, Sf1, Sox9	377	39	13588	3.69666	1	0.590855	80.8694
GOTERM_BP_FAT	GO:0008406~gonad development	6	1.31868	0.0968267	Osr1, Fgf9, Bax, Sf1, Eif2B2, Sox9	377	88	13588	2.45744	1	0.59556	82.3409
GOTERM_BP_FAT	GO:0003006~reproductive developmental process	12	2.63736	0.116843	Akt1, Tcf7, Osr1, Fgf9, Fkbp4, Phb2, Bax, Dld, Sf1, Hoxd13, Eif2B2, Sox9	377	264	13588	1.63829	1	0.636366	87.9425
GOTERM_BP_FAT	GO:0030850~prostate gland development	3	0.659341	0.293759	Fkbp4, Hoxd13, Sox9	377	39	13588	2.7725	1	0.869718	99.7319
Annotation Cluster 53	Enrichment Score: 1.1856020091701227
Category	Term	Count	%	PValue	Genes	List Total	Pop Hits	Pop Total	Fold Enrichment	Bonferroni	Benjamini	FDR
INTERPRO	IPR000717:Proteasome component region PCI	3	0.659341	0.0563286	Cops2, Psmd13, Psmd3	432	16	17763	7.70964	1	0.68814	59.0742
SMART	SM00088:PINT	3	0.659341	0.0564604	Cops2, Psmd13, Psmd3	223	16	9131	7.67741	0.999927	0.519615	50.575
UP_SEQ_FEATURE	domain:PCI	3	0.659341	0.0872411	Cops2, Psmd13, Psmd3	444	18	16021	6.01389	1	0.922885	77.0651
Annotation Cluster 54	Enrichment Score: 1.1698358714294939
Category	Term	Count	%	PValue	Genes	List Total	Pop Hits	Pop Total	Fold Enrichment	Bonferroni	Benjamini	FDR
GOTERM_CC_FAT	GO:0000775~chromosome, centromeric region	8	1.75824	0.0165572	Spc24, Xpo1, Apitd1, Cenpb, Incenp, Bub1, Rangap1, Cenpk	298	111	12504	3.02412	0.996796	0.159737	20.3683
SP_PIR_KEYWORDS	kinetochore	6	1.31868	0.0173878	Spc24, Incenp, Bub1, Rangap1, Cenpk, Bub3	443	61	17854	3.96418	0.996991	0.129109	21.1727
GOTERM_CC_FAT	GO:0000776~kinetochore	5	1.0989	0.0595459	Spc24, Xpo1, Incenp, Bub1, Rangap1	298	62	12504	3.38385	1	0.388071	56.7206
GOTERM_CC_FAT	GO:0000777~condensed chromosome kinetochore	4	0.879121	0.131128	Spc24, Incenp, Bub1, Rangap1	298	53	12504	3.16677	1	0.598404	85.3019
GOTERM_CC_FAT	GO:0000779~condensed chromosome, centromeric region	4	0.879121	0.170544	Spc24, Incenp, Bub1, Rangap1	298	60	12504	2.79732	1	0.676472	92.1979
GOTERM_CC_FAT	GO:0000793~condensed chromosome	5	1.0989	0.249673	Spc24, Incenp, Bub1, Rangap1, Top2A	298	107	12504	1.96074	1	0.761185	98.0129
Annotation Cluster 55	Enrichment Score: 1.1636518072349813
Category	Term	Count	%	PValue	Genes	List Total	Pop Hits	Pop Total	Fold Enrichment	Bonferroni	Benjamini	FDR
GOTERM_BP_FAT	GO:0048729~tissue morphogenesis	15	3.2967	0.00656302	Tbx5, Tbx4, Hoxd13, Sox9, Hoxd11, Tgfb2, Aldh1A2, Pfn1, Macf1, Phb2, Txnrd1, Ngfr, Tbx18, Etv4, Twist1	377	238	13588	2.27158	0.999995	0.154878	10.6053
GOTERM_BP_FAT	GO:0035295~tube development	16	3.51648	0.00683233	Fgf9, Tbx5, Tbx4, Mycn, Hoxd11, Ednra, Wnt2, Aldh1A2, Pfn1, Ppp1Ca, Phb2, Sp3, Robo2, Etv4, Sim2, Twist1	377	264	13588	2.18439	0.999997	0.158697	11.017
GOTERM_BP_FAT	GO:0002009~morphogenesis of an epithelium	11	2.41758	0.0222072	Aldh1A2, Pfn1, Phb2, Tbx5, Tbx4, Hoxd13, Sox9, Tbx18, Etv4, Hoxd11, Twist1	377	173	13588	2.29172	1	0.322826	31.7748
GOTERM_BP_FAT	GO:0001763~morphogenesis of a branching structure	8	1.75824	0.0586366	Ednra, Ppp1Ca, Phb2, Hoxd13, Sox9, Etv4, Mycn, Hoxd11	377	125	13588	2.30672	1	0.525835	64.2564
GOTERM_BP_FAT	GO:0060429~epithelium development	13	2.85714	0.0760157	E2F4, Tbx5, Tbx4, Hoxd13, Sox9, Hoxd11, Pfn1, Aldh1A2, Phb2, Id3, Tbx18, Etv4, Twist1	377	271	13588	1.72897	1	0.568665	73.9737
GOTERM_BP_FAT	GO:0048754~branching morphogenesis of a tube	6	1.31868	0.115343	Ednra, Ppp1Ca, Phb2, Etv4, Mycn, Hoxd11	377	93	13588	2.32532	1	0.636225	87.5892
GOTERM_BP_FAT	GO:0060688~regulation of morphogenesis of a branching structure	3	0.659341	0.151306	Phb2, Hoxd13, Etv4	377	25	13588	4.32509	1	0.706855	93.8774
GOTERM_BP_FAT	GO:0035239~tube morphogenesis	8	1.75824	0.196141	Ednra, Pfn1, Ppp1Ca, Phb2, Etv4, Mycn, Hoxd11, Twist1	377	171	13588	1.6862	1	0.766726	97.57
GOTERM_BP_FAT	GO:0060562~epithelial tube morphogenesis	5	1.0989	0.369042	Pfn1, Phb2, Etv4, Hoxd11, Twist1	377	111	13588	1.62353	1	0.917272	99.9607
GOTERM_BP_FAT	GO:0022612~gland morphogenesis	4	0.879121	0.411865	Phb2, Hoxd13, Sox9, Etv4	377	84	13588	1.71631	1	0.938608	99.9881
Annotation Cluster 56	Enrichment Score: 1.1479862295088976
Category	Term	Count	%	PValue	Genes	List Total	Pop Hits	Pop Total	Fold Enrichment	Bonferroni	Benjamini	FDR
GOTERM_BP_FAT	GO:0009953~dorsal/ventral pattern formation	6	1.31868	0.0318205	Fkbp8, Gsc, Lmx1B, Lhx2, Gas1, Hoxd11	377	64	13588	3.37898	1	0.388444	42.3383
GOTERM_BP_FAT	GO:0021904~dorsal/ventral neural tube patterning	3	0.659341	0.0709926	Fkbp8, Gsc, Gas1	377	16	13588	6.75796	1	0.555741	71.4569
GOTERM_BP_FAT	GO:0021915~neural tube development	6	1.31868	0.0799597	Pfn1, Tcf7, Fkbp8, Gsc, Gas1, Twist1	377	83	13588	2.60548	1	0.567396	75.8018
GOTERM_BP_FAT	GO:0021532~neural tube patterning	3	0.659341	0.141665	Fkbp8, Gsc, Gas1	377	24	13588	4.50531	1	0.691511	92.5792
Annotation Cluster 57	Enrichment Score: 1.14326351044167
Category	Term	Count	%	PValue	Genes	List Total	Pop Hits	Pop Total	Fold Enrichment	Bonferroni	Benjamini	FDR
INTERPRO	IPR006649:Like-Sm ribonucleoprotein, eukaryotic and archaea-type, core	3	0.659341	0.0695923	Lsmd1, Snrpb, Lsm4	432	18	17763	6.85301	1	0.740978	67.0946
SMART	SM00651:Sm	3	0.659341	0.0697587	Lsmd1, Snrpb, Lsm4	223	18	9131	6.82436	0.999993	0.571333	58.3901
INTERPRO	IPR001163:Like-Sm ribonucleoprotein, core	3	0.659341	0.0765684	Lsmd1, Snrpb, Lsm4	432	19	17763	6.49232	1	0.767447	70.6978
Annotation Cluster 58	Enrichment Score: 1.1194004871373338
Category	Term	Count	%	PValue	Genes	List Total	Pop Hits	Pop Total	Fold Enrichment	Bonferroni	Benjamini	FDR
KEGG_PATHWAY	mmu00670:One carbon pool by folate	4	0.879121	0.0133497	Mthfd2, Shmt2, Atic, Mthfd1L	185	16	5738	7.75405	0.830351	0.148942	14.5241
SP_PIR_KEYWORDS	one-carbon metabolism	3	0.659341	0.0519083	Mthfd2, Shmt2, Mthfd1L	443	15	17854	8.0605	1	0.262287	51.4694
GOTERM_BP_FAT	GO:0006730~one-carbon metabolic process	4	0.879121	0.632545	Mthfd2, Shmt2, Prmt7, Mthfd1L	377	117	13588	1.23222	1	0.990116	100
Annotation Cluster 59	Enrichment Score: 1.109103085370233
Category	Term	Count	%	PValue	Genes	List Total	Pop Hits	Pop Total	Fold Enrichment	Bonferroni	Benjamini	FDR
UP_SEQ_FEATURE	domain:LIM zinc-binding 2	5	1.0989	0.0489895	Lmo1, Lmo2, Lmx1B, Lhx2, Isl1	444	50	16021	3.60833	1	0.815857	55.5263
UP_SEQ_FEATURE	domain:LIM zinc-binding 1	5	1.0989	0.0489895	Lmo1, Lmo2, Lmx1B, Lhx2, Isl1	444	50	16021	3.60833	1	0.815857	55.5263
INTERPRO	IPR001781:Zinc finger, LIM-type	5	1.0989	0.105193	Lmo1, Lmo2, Lmx1B, Lhx2, Isl1	432	74	17763	2.77825	1	0.857531	81.963
SMART	SM00132:LIM	5	1.0989	0.105381	Lmo1, Lmo2, Lmx1B, Lhx2, Isl1	223	74	9131	2.76663	1	0.680633	74.0837
SP_PIR_KEYWORDS	LIM domain	5	1.0989	0.107035	Lmo1, Lmo2, Lmx1B, Lhx2, Isl1	443	73	17854	2.76044	1	0.433205	78.4646
Annotation Cluster 60	Enrichment Score: 1.0842712541415256
Category	Term	Count	%	PValue	Genes	List Total	Pop Hits	Pop Total	Fold Enrichment	Bonferroni	Benjamini	FDR
GOTERM_BP_FAT	GO:0008286~insulin receptor signaling pathway	5	1.0989	0.00698459	Akt1, Phip, Eif4Ebp1, Eif4Ebp2, Pik3R2	377	28	13588	6.43615	0.999997	0.159939	11.249
GOTERM_BP_FAT	GO:0043434~response to peptide hormone stimulus	8	1.75824	0.0162005	Wnt2, Akt1, Phip, Eif4Ebp1, Eif4Ebp2, Col1A1, Eif2B2, Pik3R2	377	95	13588	3.03515	1	0.273642	24.2767
GOTERM_BP_FAT	GO:0032869~cellular response to insulin stimulus	5	1.0989	0.030496	Akt1, Phip, Eif4Ebp1, Eif4Ebp2, Pik3R2	377	43	13588	4.19098	1	0.383029	40.9804
KEGG_PATHWAY	mmu05221:Acute myeloid leukemia	6	1.31868	0.0350342	Akt1, Tcf7, Ccnd1, Eif4Ebp1, Myc, Pik3R2	185	57	5738	3.26486	0.990972	0.269357	34.0608
GOTERM_BP_FAT	GO:0009719~response to endogenous stimulus	10	2.1978	0.0700735	Wnt2, Akt1, Phip, Eif4Ebp1, Eif4Ebp2, Tgfbr1, Aars, Col1A1, Eif2B2, Pik3R2	377	184	13588	1.95883	1	0.55961	70.9723
GOTERM_BP_FAT	GO:0032870~cellular response to hormone stimulus	5	1.0989	0.0763541	Akt1, Phip, Eif4Ebp1, Eif4Ebp2, Pik3R2	377	58	13588	3.10711	1	0.568251	74.1355
GOTERM_BP_FAT	GO:0007167~enzyme linked receptor protein signaling pathway	13	2.85714	0.0774853	Fgf9, Tgfbr1, Usp9X, Stub1, Pdap1, Tgfb2, Phip, Akt1, Eif4Ebp1, Eif4Ebp2, Msx1, Dok4, Pik3R2	377	273	13588	1.71631	1	0.56966	74.6696
GOTERM_BP_FAT	GO:0032868~response to insulin stimulus	5	1.0989	0.0802099	Akt1, Phip, Eif4Ebp1, Eif4Ebp2, Pik3R2	377	59	13588	3.05444	1	0.566602	75.9136
GOTERM_BP_FAT	GO:0009725~response to hormone stimulus	9	1.97802	0.087914	Wnt2, Akt1, Phip, Eif4Ebp1, Eif4Ebp2, Tgfbr1, Col1A1, Eif2B2, Pik3R2	377	165	13588	1.96595	1	0.584095	79.1273
GOTERM_BP_FAT	GO:0010033~response to organic substance	20	4.3956	0.109119	Upf2, Tgfbr1, Aars, Nnat, Lin28B, B2M, Wnt2, Akt1, Phip, Ccnd1, Eif4Ebp1, Eif4Ebp2, Msx1, Eif4A2, Col1A1, Id3, Eif2B2, Myc, Tcf3, Pik3R2	377	505	13588	1.42742	1	0.627994	86.0157
KEGG_PATHWAY	mmu04150:mTOR signaling pathway	4	0.879121	0.249562	Akt1, Eif4Ebp1, Ddit4, Pik3R2	185	54	5738	2.2975	1	0.661344	96.5003
GOTERM_BP_FAT	GO:0007169~transmembrane receptor protein tyrosine kinase signaling pathway	8	1.75824	0.28285	Akt1, Phip, Eif4Ebp1, Eif4Ebp2, Dok4, Fgf9, Pdap1, Pik3R2	377	192	13588	1.50177	1	0.861012	99.6519
KEGG_PATHWAY	mmu04910:Insulin signaling pathway	6	1.31868	0.455898	Akt1, Ppp1Ca, Eif4Ebp1, Hk2, Ppp1Cb, Pik3R2	185	138	5738	1.34853	1	0.845617	99.9181
KEGG_PATHWAY	mmu04012:ErbB signaling pathway	4	0.879121	0.532604	Akt1, Eif4Ebp1, Myc, Pik3R2	185	87	5738	1.42603	1	0.887244	99.9861
Annotation Cluster 61	Enrichment Score: 1.0789519863251715
Category	Term	Count	%	PValue	Genes	List Total	Pop Hits	Pop Total	Fold Enrichment	Bonferroni	Benjamini	FDR
GOTERM_BP_FAT	GO:0007517~muscle organ development	12	2.63736	0.00989163	Hoxd9, Des, Gsc, Msx1, Meox2, Tbx5, Myf5, Hoxd10, Tcf15, Pitx1, Fxr1, Tgfb2	377	176	13588	2.45744	1	0.191592	15.5703
GOTERM_BP_FAT	GO:0035137~hindlimb morphogenesis	4	0.879121	0.0669208	Hoxd9, Hoxd10, Pitx1, Twist1	377	34	13588	4.24029	1	0.553641	69.2504
GOTERM_BP_FAT	GO:0007519~skeletal muscle tissue development	5	1.0989	0.138432	Hoxd9, Meox2, Myf5, Hoxd10, Pitx1	377	72	13588	2.50295	1	0.687048	92.0886
GOTERM_BP_FAT	GO:0014706~striated muscle tissue development	7	1.53846	0.140539	Hoxd9, Meox2, Tbx5, Myf5, Hoxd10, Pitx1, Tgfb2	377	127	13588	1.98659	1	0.689903	92.4116
GOTERM_BP_FAT	GO:0060538~skeletal muscle organ development	5	1.0989	0.14859	Hoxd9, Meox2, Myf5, Hoxd10, Pitx1	377	74	13588	2.4353	1	0.702712	93.5352
GOTERM_BP_FAT	GO:0060537~muscle tissue development	7	1.53846	0.175565	Hoxd9, Meox2, Tbx5, Myf5, Hoxd10, Pitx1, Tgfb2	377	136	13588	1.85513	1	0.736955	96.2632
Annotation Cluster 62	Enrichment Score: 1.0671886541845412
Category	Term	Count	%	PValue	Genes	List Total	Pop Hits	Pop Total	Fold Enrichment	Bonferroni	Benjamini	FDR
GOTERM_BP_FAT	GO:0007411~axon guidance	8	1.75824	0.0189203	Lhx2, Robo2, Gas1, Ngfr, Isl1, Ntn1, Etv4, Tgfb2	377	98	13588	2.94224	1	0.303954	27.7631
GOTERM_BP_FAT	GO:0006928~cell motion	18	3.95604	0.0268497	Lmx1B, Tgfbr1, Atp5B, Gas1, Isl1, Ntn1, Ywhae, Tgfb2, Wnt2, Nup62, Macf1, Lhx2, Bax, Robo2, Ngfr, Top2B, Etv4, Twist1	377	367	13588	1.76775	1	0.360541	37.0851
GOTERM_BP_FAT	GO:0030182~neuron differentiation	18	3.95604	0.0525144	Lmx1B, Tgfbr1, Gas1, Isl1, Ntn1, Hoxd10, Tgfb2, Cdkn1C, Hoxd9, Hoxc10, Aldh1A2, Lhx2, Nr2F6, Robo2, Id3, Ngfr, Top2B, Etv4	377	399	13588	1.62597	1	0.505369	60.0855
GOTERM_BP_FAT	GO:0048666~neuron development	14	3.07692	0.0629506	Lmx1B, Gas1, Isl1, Ntn1, Hoxd10, Tgfb2, Hoxd9, Cdkn1C, Lhx2, Nr2F6, Robo2, Ngfr, Top2B, Etv4	377	292	13588	1.72806	1	0.542479	66.9452
GOTERM_BP_FAT	GO:0000904~cell morphogenesis involved in differentiation	11	2.41758	0.0706921	Lhx2, Trim28, Robo2, Gas1, Ngfr, Isl1, Top2B, Sox9, Ntn1, Etv4, Tgfb2	377	212	13588	1.87013	1	0.556319	71.2993
GOTERM_BP_FAT	GO:0032990~cell part morphogenesis	11	2.41758	0.0706921	E2F4, Bax, Lhx2, Robo2, Gas1, Ngfr, Isl1, Top2B, Ntn1, Etv4, Tgfb2	377	212	13588	1.87013	1	0.556319	71.2993
GOTERM_BP_FAT	GO:0007409~axonogenesis	9	1.97802	0.0833101	Lhx2, Robo2, Gas1, Ngfr, Isl1, Top2B, Ntn1, Etv4, Tgfb2	377	163	13588	1.99007	1	0.577052	77.2591
GOTERM_BP_FAT	GO:0000902~cell morphogenesis	14	3.07692	0.0886209	E2F4, Trim28, Gas1, Sox9, Isl1, Ntn1, Llgl1, Tgfb2, Macf1, Lhx2, Robo2, Ngfr, Top2B, Etv4	377	309	13588	1.63299	1	0.58153	79.4011
GOTERM_BP_FAT	GO:0048858~cell projection morphogenesis	10	2.1978	0.109027	E2F4, Lhx2, Robo2, Gas1, Ngfr, Isl1, Top2B, Ntn1, Etv4, Tgfb2	377	202	13588	1.78428	1	0.629381	85.9912
GOTERM_BP_FAT	GO:0032989~cellular component morphogenesis	15	3.2967	0.109658	E2F4, Trim28, Gas1, Sox9, Isl1, Ntn1, Llgl1, Tgfb2, Macf1, Lhx2, Bax, Robo2, Ngfr, Top2B, Etv4	377	351	13588	1.54028	1	0.626508	86.1589
GOTERM_BP_FAT	GO:0048812~neuron projection morphogenesis	9	1.97802	0.115813	Lhx2, Robo2, Gas1, Ngfr, Isl1, Top2B, Ntn1, Etv4, Tgfb2	377	176	13588	1.84308	1	0.634533	87.701
GOTERM_BP_FAT	GO:0048667~cell morphogenesis involved in neuron differentiation	9	1.97802	0.132822	Lhx2, Robo2, Gas1, Ngfr, Isl1, Top2B, Ntn1, Etv4, Tgfb2	377	182	13588	1.78232	1	0.67548	91.1642
GOTERM_BP_FAT	GO:0031175~neuron projection development	9	1.97802	0.257635	Lhx2, Robo2, Gas1, Ngfr, Isl1, Top2B, Ntn1, Etv4, Tgfb2	377	218	13588	1.48799	1	0.839138	99.3732
GOTERM_BP_FAT	GO:0030030~cell projection organization	11	2.41758	0.390509	Akt1, E2F4, Lhx2, Robo2, Gas1, Ngfr, Isl1, Top2B, Ntn1, Etv4, Tgfb2	377	319	13588	1.24284	1	0.928689	99.9782
Annotation Cluster 63	Enrichment Score: 1.0614518876817514
Category	Term	Count	%	PValue	Genes	List Total	Pop Hits	Pop Total	Fold Enrichment	Bonferroni	Benjamini	FDR
GOTERM_BP_FAT	GO:0034621~cellular macromolecular complex subunit organization	12	2.63736	0.0790288	Wnt2, H1F0, Xpo1, Prpf31, Prmt7, Ipo7, Nasp, Fkbp4, Tubb6, Mcm2, Calr, Tuba1B	377	245	13588	1.76534	1	0.573019	75.3816
GOTERM_BP_FAT	GO:0043623~cellular protein complex assembly	7	1.53846	0.079131	Wnt2, Xpo1, Ipo7, Fkbp4, Tubb6, Calr, Tuba1B	377	108	13588	2.33608	1	0.569451	75.428
GOTERM_BP_FAT	GO:0034622~cellular macromolecular complex assembly	11	2.41758	0.0797625	Wnt2, H1F0, Xpo1, Prpf31, Prmt7, Ipo7, Fkbp4, Tubb6, Mcm2, Calr, Tuba1B	377	217	13588	1.82704	1	0.570448	75.7133
GOTERM_BP_FAT	GO:0043933~macromolecular complex subunit organization	16	3.51648	0.0859379	H1F0, Prpf31, Xpo1, Fkbp4, Nasp, Scube1, Mcm2, Calr, Wnt2, Prmt7, Ipo7, Bax, Tubb6, Myc, Tuba1B, Olfm1	377	367	13588	1.57133	1	0.583053	78.3439
GOTERM_BP_FAT	GO:0065003~macromolecular complex assembly	15	3.2967	0.0873811	H1F0, Prpf31, Xpo1, Fkbp4, Scube1, Mcm2, Calr, Wnt2, Prmt7, Ipo7, Bax, Tubb6, Myc, Tuba1B, Olfm1	377	338	13588	1.59952	1	0.585573	78.9187
GOTERM_BP_FAT	GO:0006461~protein complex assembly	11	2.41758	0.0995754	Wnt2, Xpo1, Ipo7, Fkbp4, Bax, Scube1, Tubb6, Calr, Myc, Tuba1B, Olfm1	377	227	13588	1.74655	1	0.601093	83.234
GOTERM_BP_FAT	GO:0070271~protein complex biogenesis	11	2.41758	0.0995754	Wnt2, Xpo1, Ipo7, Fkbp4, Bax, Scube1, Tubb6, Calr, Myc, Tuba1B, Olfm1	377	227	13588	1.74655	1	0.601093	83.234
Annotation Cluster 64	Enrichment Score: 1.0475901396919205
Category	Term	Count	%	PValue	Genes	List Total	Pop Hits	Pop Total	Fold Enrichment	Bonferroni	Benjamini	FDR
GOTERM_BP_FAT	GO:0022405~hair cycle process	5	1.0989	0.0490486	Akt1, Aars, Ngfr, Sox9, Tgfb2	377	50	13588	3.60424	1	0.491077	57.5255
GOTERM_BP_FAT	GO:0022404~molting cycle process	5	1.0989	0.0490486	Akt1, Aars, Ngfr, Sox9, Tgfb2	377	50	13588	3.60424	1	0.491077	57.5255
GOTERM_BP_FAT	GO:0001942~hair follicle development	5	1.0989	0.0490486	Akt1, Aars, Ngfr, Sox9, Tgfb2	377	50	13588	3.60424	1	0.491077	57.5255
GOTERM_BP_FAT	GO:0043588~skin development	4	0.879121	0.0491752	Aars, Col1A1, Ngfr, Tcf15	377	30	13588	4.80566	1	0.489487	57.6216
GOTERM_BP_FAT	GO:0042633~hair cycle	5	1.0989	0.0552726	Akt1, Aars, Ngfr, Sox9, Tgfb2	377	52	13588	3.46562	1	0.516416	62.0184
GOTERM_BP_FAT	GO:0042303~molting cycle	5	1.0989	0.0552726	Akt1, Aars, Ngfr, Sox9, Tgfb2	377	52	13588	3.46562	1	0.516416	62.0184
GOTERM_BP_FAT	GO:0008544~epidermis development	7	1.53846	0.133238	Akt1, Aars, Col1A1, Ngfr, Sox9, Tcf15, Tgfb2	377	125	13588	2.01838	1	0.675143	91.2361
GOTERM_BP_FAT	GO:0007398~ectoderm development	7	1.53846	0.163511	Akt1, Aars, Col1A1, Ngfr, Sox9, Tcf15, Tgfb2	377	133	13588	1.89697	1	0.721484	95.2157
GOTERM_BP_FAT	GO:0009611~response to wounding	6	1.31868	0.965759	Akt1, Bax, Ngfr, Id3, Mdk, Tgfb2	377	347	13588	0.623212	1	0.999998	100
Annotation Cluster 65	Enrichment Score: 1.0273972406066005
Category	Term	Count	%	PValue	Genes	List Total	Pop Hits	Pop Total	Fold Enrichment	Bonferroni	Benjamini	FDR
SP_PIR_KEYWORDS	nad	10	2.1978	0.0250591	Mthfd2, Aldh1A2, Ctbp1, Isyna1, Ctbp2, Nxn, Dld, Parp1, Impdh1, Mdh2	443	169	17854	2.38476	0.999775	0.157544	29.1223
UP_SEQ_FEATURE	nucleotide phosphate-binding region:NAD	6	1.31868	0.0513779	Aldh1A2, Ctbp1, Ctbp2, Dld, Impdh1, Mdh2	444	73	16021	2.96575	1	0.813758	57.2942
UP_SEQ_FEATURE	binding site:NAD	4	0.879121	0.133882	Ctbp1, Ctbp2, Dld, Mdh2	444	46	16021	3.13768	1	0.974877	90.1588
SP_PIR_KEYWORDS	oxidoreductase	16	3.51648	0.450763	Ctbp1, Ctbp2, Hsd17B12, Pgd, Qdpr, Gfer, Cox4I1, Cdo1, Aldh1A2, Mthfd2, Nxn, Dohh, Dld, Txnrd1, Impdh1, Mdh2	443	572	17854	1.12734	1	0.862404	99.9705
Annotation Cluster 66	Enrichment Score: 1.0253219980477655
Category	Term	Count	%	PValue	Genes	List Total	Pop Hits	Pop Total	Fold Enrichment	Bonferroni	Benjamini	FDR
GOTERM_BP_FAT	GO:0007423~sensory organ development	14	3.07692	0.0268794	Fzr1, Fkbp8, Gsc, Lmx1B, Fgf9, Col2A1, Gas1, Tgfb2, Aldh1A2, Bax, Sp3, Myc, Mab21L2, Tcf15	377	257	13588	1.9634	1	0.358324	37.1177
GOTERM_BP_FAT	GO:0043010~camera-type eye development	8	1.75824	0.0693235	Aldh1A2, Fkbp8, Fzr1, Lmx1B, Sp3, Bax, Gas1, Mab21L2	377	130	13588	2.218	1	0.557803	70.5711
GOTERM_BP_FAT	GO:0001654~eye development	9	1.97802	0.0703744	Aldh1A2, Fkbp8, Fzr1, Lmx1B, Sp3, Bax, Gas1, Mab21L2, Tgfb2	377	157	13588	2.06613	1	0.559006	71.1318
GOTERM_BP_FAT	GO:0048592~eye morphogenesis	3	0.659341	0.603946	Sp3, Bax, Gas1	377	73	13588	1.4812	1	0.987061	100
Annotation Cluster 67	Enrichment Score: 0.9770388200548631
Category	Term	Count	%	PValue	Genes	List Total	Pop Hits	Pop Total	Fold Enrichment	Bonferroni	Benjamini	FDR
GOTERM_BP_FAT	GO:0070227~lymphocyte apoptosis	4	0.879121	0.00383937	Akt1, Bax, Myc, Tgfb2	377	12	13588	12.0141	0.999157	0.103174	6.33954
KEGG_PATHWAY	mmu05210:Colorectal cancer	8	1.75824	0.0198307	Akt1, Tcf7, Ccnd1, Bax, Tgfbr1, Myc, Pik3R2, Tgfb2	185	86	5738	2.88523	0.92892	0.197745	20.8553
GOTERM_BP_FAT	GO:0043029~T cell homeostasis	3	0.659341	0.0873346	Akt1, Bax, Tgfb2	377	18	13588	6.00707	1	0.587286	78.9004
GOTERM_BP_FAT	GO:0002260~lymphocyte homeostasis	3	0.659341	0.201104	Akt1, Bax, Tgfb2	377	30	13588	3.60424	1	0.774949	97.8132
GOTERM_BP_FAT	GO:0001776~leukocyte homeostasis	3	0.659341	0.293759	Akt1, Bax, Tgfb2	377	39	13588	2.7725	1	0.869718	99.7319
GOTERM_BP_FAT	GO:0048872~homeostasis of number of cells	5	1.0989	0.381648	Akt1, Maea, Sp3, Bax, Tgfb2	377	113	13588	1.5948	1	0.924695	99.9721
GOTERM_BP_FAT	GO:0009611~response to wounding	6	1.31868	0.965759	Akt1, Bax, Ngfr, Id3, Mdk, Tgfb2	377	347	13588	0.623212	1	0.999998	100
Annotation Cluster 68	Enrichment Score: 0.9687721283669982
Category	Term	Count	%	PValue	Genes	List Total	Pop Hits	Pop Total	Fold Enrichment	Bonferroni	Benjamini	FDR
SP_PIR_KEYWORDS	protein biosynthesis	10	2.1978	0.00779389	Eif4G1, Eif4G2, Yars, Eif4A2, Aars, Eprs, Eif2B2, Kars, Rps3, Mars	443	139	17854	2.89946	0.924971	0.0713252	10.0688
SP_PIR_KEYWORDS	Initiation factor	4	0.879121	0.155127	Eif4G1, Eif4G2, Eif4A2, Eif2B2	443	55	17854	2.93109	1	0.549362	89.8363
GOTERM_MF_FAT	GO:0003743~translation initiation factor activity	4	0.879121	0.227365	Eif4G1, Eif4G2, Eif4A2, Eif2B2	354	62	13288	2.42172	1	0.891497	97.5835
GOTERM_MF_FAT	GO:0008135~translation factor activity, nucleic acid binding	4	0.879121	0.485004	Eif4G1, Eif4G2, Eif4A2, Eif2B2	354	98	13288	1.53211	1	0.982777	99.9931
Annotation Cluster 69	Enrichment Score: 0.9658365574032611
Category	Term	Count	%	PValue	Genes	List Total	Pop Hits	Pop Total	Fold Enrichment	Bonferroni	Benjamini	FDR
GOTERM_BP_FAT	GO:0051329~interphase of mitotic cell cycle	5	1.0989	0.0460899	Ccnd1, E2F4, Ccnd2, Chek1, Tcf3	377	49	13588	3.6778	1	0.474353	55.2185
GOTERM_BP_FAT	GO:0051325~interphase	5	1.0989	0.0521096	Ccnd1, E2F4, Ccnd2, Chek1, Tcf3	377	51	13588	3.53357	1	0.50508	59.7942
GOTERM_MF_FAT	GO:0019900~kinase binding	6	1.31868	0.0756239	Wnt2, Ccnd1, Ywhag, Ccnd2, Chek1, Gnb2L1	354	85	13288	2.64965	1	0.622552	67.8553
GOTERM_MF_FAT	GO:0019901~protein kinase binding	5	1.0989	0.119851	Ccnd1, Ywhag, Ccnd2, Chek1, Gnb2L1	354	71	13288	2.64343	1	0.748387	84.1583
GOTERM_BP_FAT	GO:0000082~G1/S transition of mitotic cell cycle	3	0.659341	0.180919	Ccnd1, E2F4, Ccnd2	377	28	13588	3.86169	1	0.744646	96.6556
GOTERM_MF_FAT	GO:0019899~enzyme binding	8	1.75824	0.407071	Wnt2, Pfn1, Ccnd1, Ywhag, Ccnd2, Chek1, Cotl1, Gnb2L1	354	229	13288	1.31133	1	0.969612	99.9471
Annotation Cluster 70	Enrichment Score: 0.9460973362829223
Category	Term	Count	%	PValue	Genes	List Total	Pop Hits	Pop Total	Fold Enrichment	Bonferroni	Benjamini	FDR
GOTERM_BP_FAT	GO:0010810~regulation of cell-substrate adhesion	5	1.0989	0.0240778	Smoc1, Myf5, Emid2, Hsd17B12, Col1A1	377	40	13588	4.50531	1	0.339814	33.9633
GOTERM_BP_FAT	GO:0030155~regulation of cell adhesion	6	1.31868	0.119236	Atp5B, Smoc1, Myf5, Emid2, Hsd17B12, Col1A1	377	94	13588	2.30058	1	0.642689	88.487
GOTERM_BP_FAT	GO:0010811~positive regulation of cell-substrate adhesion	3	0.659341	0.170946	Smoc1, Emid2, Hsd17B12	377	27	13588	4.00472	1	0.730606	95.8904
GOTERM_BP_FAT	GO:0045785~positive regulation of cell adhesion	3	0.659341	0.334755	Smoc1, Emid2, Hsd17B12	377	43	13588	2.51459	1	0.89909	99.9031
Annotation Cluster 71	Enrichment Score: 0.9106666231300105
Category	Term	Count	%	PValue	Genes	List Total	Pop Hits	Pop Total	Fold Enrichment	Bonferroni	Benjamini	FDR
GOTERM_BP_FAT	GO:0031346~positive regulation of cell projection organization	4	0.879121	0.024695	Metrn, Tgfbr1, Robo2, Ntn1	377	23	13588	6.26825	1	0.344333	34.6707
GOTERM_BP_FAT	GO:0051094~positive regulation of developmental process	12	2.63736	0.0360204	Irx3, Metrn, Fgf9, Bax, Tbx5, Rhob, Robo2, Ngfr, Runx2, Ntn1, Hoxd11, Tgfb2	377	214	13588	2.02107	1	0.417255	46.4521
GOTERM_BP_FAT	GO:0050772~positive regulation of axonogenesis	3	0.659341	0.063244	Metrn, Robo2, Ntn1	377	15	13588	7.20849	1	0.541867	67.121
GOTERM_BP_FAT	GO:0045664~regulation of neuron differentiation	7	1.53846	0.0636538	Irx3, Ywhag, Metrn, Ywhah, Robo2, Isl1, Ntn1	377	102	13588	2.4735	1	0.541939	67.365
GOTERM_BP_FAT	GO:0031344~regulation of cell projection organization	5	1.0989	0.0725943	Metrn, Ywhah, Tgfbr1, Robo2, Ntn1	377	57	13588	3.16162	1	0.559803	72.2833
GOTERM_BP_FAT	GO:0060284~regulation of cell development	9	1.97802	0.0745401	Irx3, Ywhag, Metrn, Ywhah, Bax, Robo2, Isl1, Ntn1, Hoxd11	377	159	13588	2.04014	1	0.563379	73.2569
GOTERM_BP_FAT	GO:0051130~positive regulation of cellular component organization	7	1.53846	0.122637	Wnt2, Metrn, Tgfbr1, Mfge8, Robo2, Calr, Ntn1	377	122	13588	2.06801	1	0.6505	89.221
GOTERM_BP_FAT	GO:0010975~regulation of neuron projection development	4	0.879121	0.140429	Metrn, Ywhah, Robo2, Ntn1	377	47	13588	3.06744	1	0.691124	92.395
GOTERM_BP_FAT	GO:0010720~positive regulation of cell development	4	0.879121	0.140429	Metrn, Robo2, Ntn1, Hoxd11	377	47	13588	3.06744	1	0.691124	92.395
GOTERM_BP_FAT	GO:0050767~regulation of neurogenesis	7	1.53846	0.159575	Irx3, Ywhag, Metrn, Ywhah, Robo2, Isl1, Ntn1	377	132	13588	1.91134	1	0.71899	94.8176
GOTERM_BP_FAT	GO:0010769~regulation of cell morphogenesis involved in differentiation	4	0.879121	0.160149	Metrn, Ywhah, Robo2, Ntn1	377	50	13588	2.8834	1	0.718977	94.8775
GOTERM_BP_FAT	GO:0045597~positive regulation of cell differentiation	8	1.75824	0.211753	Irx3, Metrn, Tbx5, Robo2, Runx2, Ntn1, Hoxd11, Tgfb2	377	175	13588	1.64765	1	0.787127	98.2598
GOTERM_BP_FAT	GO:0051960~regulation of nervous system development	7	1.53846	0.227068	Irx3, Ywhag, Metrn, Ywhah, Robo2, Isl1, Ntn1	377	148	13588	1.70471	1	0.805992	98.754
GOTERM_BP_FAT	GO:0050770~regulation of axonogenesis	3	0.659341	0.293759	Metrn, Robo2, Ntn1	377	39	13588	2.7725	1	0.869718	99.7319
GOTERM_BP_FAT	GO:0050769~positive regulation of neurogenesis	3	0.659341	0.314324	Metrn, Robo2, Ntn1	377	41	13588	2.63725	1	0.885021	99.8379
GOTERM_BP_FAT	GO:0022604~regulation of cell morphogenesis	4	0.879121	0.505429	Metrn, Ywhah, Robo2, Ntn1	377	97	13588	1.48629	1	0.969556	99.9994
Annotation Cluster 72	Enrichment Score: 0.908521411406553
Category	Term	Count	%	PValue	Genes	List Total	Pop Hits	Pop Total	Fold Enrichment	Bonferroni	Benjamini	FDR
GOTERM_BP_FAT	GO:0006119~oxidative phosphorylation	7	1.53846	0.00436205	Atp5D, Uqcrc1, Atp5B, Ndufa7, Dld, Atp5A1, Atp5G3	377	56	13588	4.50531	0.999679	0.111562	7.17274
SP_PIR_KEYWORDS	cf(1)	3	0.659341	0.00581933	Atp5D, Atp5B, Atp5A1	443	5	17854	24.1815	0.855116	0.0568596	7.61075
GOTERM_CC_FAT	GO:0045261~proton-transporting ATP synthase complex, catalytic core F(1)	3	0.659341	0.00791795	Atp5D, Atp5B, Atp5A1	298	6	12504	20.9799	0.935081	0.0930472	10.2771
GOTERM_CC_FAT	GO:0045259~proton-transporting ATP synthase complex	4	0.879121	0.0096956	Atp5D, Atp5B, Atp5A1, Atp5G3	298	19	12504	8.83363	0.96497	0.109143	12.4455
GOTERM_BP_FAT	GO:0044271~nitrogen compound biosynthetic process	16	3.51648	0.0211485	Bcat1, Atp5D, Dctd, Atp5B, Qdpr, Asns, Cad, Atp5G3, Mthfd1L, Tgfb2, Umps, Nme1, Atic, Atp5A1, Psat1, Impdh1	377	302	13588	1.90953	1	0.319954	30.5062
GOTERM_MF_FAT	GO:0015078~hydrogen ion transmembrane transporter activity	7	1.53846	0.0217713	Atp5D, Atp5B, Cox6B1, Cox4I1, Atp5A1, Atp5G3, Uqcrq	354	82	13288	3.20435	0.999986	0.34954	27.2169
GOTERM_MF_FAT	GO:0019829~cation-transporting ATPase activity	4	0.879121	0.027738	Atp5D, Atp5B, Atp5A1, Asna1	354	25	13288	6.00588	0.999999	0.399719	33.3681
GOTERM_MF_FAT	GO:0015077~monovalent inorganic cation transmembrane transporter activity	7	1.53846	0.0281623	Atp5D, Atp5B, Cox6B1, Cox4I1, Atp5A1, Atp5G3, Uqcrq	354	87	13288	3.0202	1	0.393716	33.7866
SP_PIR_KEYWORDS	atp synthesis	3	0.659341	0.0290107	Atp5D, Atp5B, Atp5A1	443	11	17854	10.9916	0.999941	0.177076	32.921
GOTERM_MF_FAT	GO:0046933~hydrogen ion transporting ATP synthase activity, rotational mechanism	3	0.659341	0.0330337	Atp5D, Atp5B, Atp5A1	354	11	13288	10.2373	1	0.433806	38.4187
GOTERM_MF_FAT	GO:0046961~proton-transporting ATPase activity, rotational mechanism	3	0.659341	0.0588359	Atp5D, Atp5B, Atp5A1	354	15	13288	7.50734	1	0.565057	58.3203
GOTERM_CC_FAT	GO:0033178~proton-transporting two-sector ATPase complex, catalytic domain	3	0.659341	0.0604875	Atp5D, Atp5B, Atp5A1	298	17	12504	7.40466	1	0.38603	57.308
GOTERM_BP_FAT	GO:0034654~nucleobase, nucleoside, nucleotide and nucleic acid biosynthetic process	10	2.1978	0.0611114	Dctd, Atp5D, Umps, Atic, Nme1, Atp5B, Cad, Atp5A1, Impdh1, Atp5G3	377	179	13588	2.01354	1	0.538612	65.8231
GOTERM_BP_FAT	GO:0034404~nucleobase, nucleoside and nucleotide biosynthetic process	10	2.1978	0.0611114	Dctd, Atp5D, Umps, Atic, Nme1, Atp5B, Cad, Atp5A1, Impdh1, Atp5G3	377	179	13588	2.01354	1	0.538612	65.8231
GOTERM_BP_FAT	GO:0009152~purine ribonucleotide biosynthetic process	7	1.53846	0.0764165	Atp5D, Atic, Nme1, Atp5B, Atp5A1, Impdh1, Atp5G3	377	107	13588	2.35792	1	0.566483	74.1652
GOTERM_CC_FAT	GO:0016469~proton-transporting two-sector ATPase complex	4	0.879121	0.0773146	Atp5D, Atp5B, Atp5A1, Atp5G3	298	42	12504	3.99616	1	0.43824	66.6363
GOTERM_BP_FAT	GO:0015985~energy coupled proton transport, down electrochemical gradient	4	0.879121	0.081875	Atp5D, Atp5B, Atp5A1, Atp5G3	377	37	13588	3.89648	1	0.572414	76.6453
GOTERM_BP_FAT	GO:0015986~ATP synthesis coupled proton transport	4	0.879121	0.081875	Atp5D, Atp5B, Atp5A1, Atp5G3	377	37	13588	3.89648	1	0.572414	76.6453
GOTERM_BP_FAT	GO:0009260~ribonucleotide biosynthetic process	7	1.53846	0.0875955	Atp5D, Atic, Nme1, Atp5B, Atp5A1, Impdh1, Atp5G3	377	111	13588	2.27295	1	0.584604	79.0029
SP_PIR_KEYWORDS	Hydrogen ion transport	4	0.879121	0.0999049	Atp5D, Atp5B, Atp5A1, Atp5G3	443	45	17854	3.58244	1	0.41491	76.0116
GOTERM_BP_FAT	GO:0034220~ion transmembrane transport	4	0.879121	0.109621	Atp5D, Atp5B, Atp5A1, Atp5G3	377	42	13588	3.43261	1	0.628077	86.1493
GOTERM_BP_FAT	GO:0009165~nucleotide biosynthetic process	9	1.97802	0.11042	Dctd, Atp5D, Umps, Atic, Nme1, Atp5B, Atp5A1, Impdh1, Atp5G3	377	174	13588	1.86426	1	0.627521	86.3594
GOTERM_BP_FAT	GO:0009150~purine ribonucleotide metabolic process	7	1.53846	0.112473	Atp5D, Atic, Nme1, Atp5B, Atp5A1, Impdh1, Atp5G3	377	119	13588	2.12014	1	0.629685	86.8855
GOTERM_MF_FAT	GO:0022890~inorganic cation transmembrane transporter activity	7	1.53846	0.122428	Atp5D, Atp5B, Cox6B1, Cox4I1, Atp5A1, Atp5G3, Uqcrq	354	127	13288	2.06895	1	0.748961	84.8147
GOTERM_BP_FAT	GO:0009259~ribonucleotide metabolic process	7	1.53846	0.133238	Atp5D, Atic, Nme1, Atp5B, Atp5A1, Impdh1, Atp5G3	377	125	13588	2.01838	1	0.675143	91.2361
GOTERM_BP_FAT	GO:0006163~purine nucleotide metabolic process	8	1.75824	0.155798	Atp5D, Atic, Nme1, Atp5B, Atp5A1, Impdh1, Guk1, Atp5G3	377	160	13588	1.80212	1	0.712496	94.4064
GOTERM_BP_FAT	GO:0015992~proton transport	4	0.879121	0.173736	Atp5D, Atp5B, Atp5A1, Atp5G3	377	52	13588	2.7725	1	0.735551	96.1196
GOTERM_BP_FAT	GO:0006164~purine nucleotide biosynthetic process	7	1.53846	0.179661	Atp5D, Atic, Nme1, Atp5B, Atp5A1, Impdh1, Atp5G3	377	137	13588	1.84158	1	0.744557	96.5671
GOTERM_BP_FAT	GO:0006818~hydrogen transport	4	0.879121	0.180648	Atp5D, Atp5B, Atp5A1, Atp5G3	377	53	13588	2.72018	1	0.745366	96.6367
GOTERM_BP_FAT	GO:0009141~nucleoside triphosphate metabolic process	6	1.31868	0.213522	Atp5D, Nme1, Atp5B, Atp5A1, Atp5G3, Dut	377	115	13588	1.88048	1	0.789057	98.3251
GOTERM_BP_FAT	GO:0009206~purine ribonucleoside triphosphate biosynthetic process	5	1.0989	0.256568	Atp5D, Nme1, Atp5B, Atp5A1, Atp5G3	377	93	13588	1.93777	1	0.838698	99.3576
GOTERM_BP_FAT	GO:0009201~ribonucleoside triphosphate biosynthetic process	5	1.0989	0.256568	Atp5D, Nme1, Atp5B, Atp5A1, Atp5G3	377	93	13588	1.93777	1	0.838698	99.3576
GOTERM_BP_FAT	GO:0009145~purine nucleoside triphosphate biosynthetic process	5	1.0989	0.262672	Atp5D, Nme1, Atp5B, Atp5A1, Atp5G3	377	94	13588	1.91715	1	0.844755	99.4418
GOTERM_BP_FAT	GO:0009142~nucleoside triphosphate biosynthetic process	5	1.0989	0.268803	Atp5D, Nme1, Atp5B, Atp5A1, Atp5G3	377	95	13588	1.89697	1	0.848731	99.5157
GOTERM_MF_FAT	GO:0042625~ATPase activity, coupled to transmembrane movement of ions	4	0.879121	0.277469	Atp5D, Atp5B, Atp5A1, Asna1	354	69	13288	2.17604	1	0.914918	99.0818
GOTERM_BP_FAT	GO:0009205~purine ribonucleoside triphosphate metabolic process	5	1.0989	0.306053	Atp5D, Nme1, Atp5B, Atp5A1, Atp5G3	377	101	13588	1.78428	1	0.880052	99.8012
GOTERM_BP_FAT	GO:0009199~ribonucleoside triphosphate metabolic process	5	1.0989	0.31232	Atp5D, Nme1, Atp5B, Atp5A1, Atp5G3	377	102	13588	1.76679	1	0.883863	99.8296
GOTERM_BP_FAT	GO:0009144~purine nucleoside triphosphate metabolic process	5	1.0989	0.337489	Atp5D, Nme1, Atp5B, Atp5A1, Atp5G3	377	106	13588	1.70012	1	0.900003	99.9097
GOTERM_BP_FAT	GO:0006754~ATP biosynthetic process	4	0.879121	0.396934	Atp5D, Atp5B, Atp5A1, Atp5G3	377	82	13588	1.75817	1	0.931551	99.9818
GOTERM_BP_FAT	GO:0046034~ATP metabolic process	4	0.879121	0.455897	Atp5D, Atp5B, Atp5A1, Atp5G3	377	90	13588	1.60189	1	0.954658	99.9968
GOTERM_MF_FAT	GO:0043492~ATPase activity, coupled to movement of substances	4	0.879121	0.478215	Atp5D, Atp5B, Atp5A1, Asna1	354	97	13288	1.54791	1	0.983087	99.9916
GOTERM_MF_FAT	GO:0042626~ATPase activity, coupled to transmembrane movement of substances	4	0.879121	0.478215	Atp5D, Atp5B, Atp5A1, Asna1	354	97	13288	1.54791	1	0.983087	99.9916
GOTERM_MF_FAT	GO:0016820~hydrolase activity, acting on acid anhydrides, catalyzing transmembrane movement of substances	4	0.879121	0.478215	Atp5D, Atp5B, Atp5A1, Asna1	354	97	13288	1.54791	1	0.983087	99.9916
GOTERM_MF_FAT	GO:0015405~P-P-bond-hydrolysis-driven transmembrane transporter activity	4	0.879121	0.544073	Atp5D, Atp5B, Atp5A1, Asna1	354	107	13288	1.40324	1	0.99085	99.9988
GOTERM_MF_FAT	GO:0015399~primary active transmembrane transporter activity	4	0.879121	0.550392	Atp5D, Atp5B, Atp5A1, Asna1	354	108	13288	1.39025	1	0.991102	99.999
GOTERM_BP_FAT	GO:0015672~monovalent inorganic cation transport	5	1.0989	0.970356	Atp5D, Atp5B, Atp5A1, Atp5G3, Kctd12	377	303	13588	0.59476	1	0.999999	100
SP_PIR_KEYWORDS	ion transport	7	1.53846	0.993156	Atp5D, Gria2, Trpm7, Atp5B, Tomm40, Atp5A1, Atp5G3	443	543	17854	0.519553	1	0.999989	100
GOTERM_BP_FAT	GO:0006811~ion transport	11	2.41758	0.995423	Wnt2, Atp5D, Gria2, Slc25A4, Trpm7, Atp5B, Fkbp4, Tomm40, Atp5A1, Atp5G3, Kctd12	377	712	13588	0.556835	1	1	100
GOTERM_BP_FAT	GO:0006812~cation transport	7	1.53846	0.996232	Atp5D, Trpm7, Atp5B, Fkbp4, Atp5A1, Atp5G3, Kctd12	377	515	13588	0.489897	1	1	100
Annotation Cluster 73	Enrichment Score: 0.8884304476350423
Category	Term	Count	%	PValue	Genes	List Total	Pop Hits	Pop Total	Fold Enrichment	Bonferroni	Benjamini	FDR
GOTERM_BP_FAT	GO:0001568~blood vessel development	13	2.85714	0.039195	Fgf9, Tgfbr1, Tbx4, Tgfb2, Ednra, Akt1, Wnt2, Aldh1A2, Fbxw8, Meox2, Bax, Rhob, Col1A1	377	244	13588	1.92029	1	0.437164	49.3766
GOTERM_BP_FAT	GO:0001944~vasculature development	13	2.85714	0.0457085	Fgf9, Tgfbr1, Tbx4, Tgfb2, Ednra, Akt1, Wnt2, Aldh1A2, Fbxw8, Meox2, Bax, Rhob, Col1A1	377	250	13588	1.87421	1	0.47399	54.9127
GOTERM_BP_FAT	GO:0048514~blood vessel morphogenesis	8	1.75824	0.309219	Ednra, Meox2, Fgf9, Bax, Tgfbr1, Tbx4, Rhob, Tgfb2	377	198	13588	1.45626	1	0.881611	99.8161
GOTERM_BP_FAT	GO:0001525~angiogenesis	5	1.0989	0.504411	Ednra, Meox2, Fgf9, Tbx4, Rhob	377	133	13588	1.35498	1	0.969532	99.9994
Annotation Cluster 74	Enrichment Score: 0.8688126465875572
Category	Term	Count	%	PValue	Genes	List Total	Pop Hits	Pop Total	Fold Enrichment	Bonferroni	Benjamini	FDR
GOTERM_BP_FAT	GO:0048663~neuron fate commitment	5	1.0989	0.0404807	Hoxc10, Tgfbr1, Isl1, Hoxd10, Tgfb2	377	47	13588	3.8343	1	0.445346	50.5176
GOTERM_BP_FAT	GO:0021522~spinal cord motor neuron differentiation	3	0.659341	0.104662	Hoxc10, Isl1, Hoxd10	377	20	13588	5.40637	1	0.615196	84.7756
GOTERM_BP_FAT	GO:0021517~ventral spinal cord development	3	0.659341	0.132165	Hoxc10, Isl1, Hoxd10	377	23	13588	4.70119	1	0.675104	91.0495
GOTERM_BP_FAT	GO:0021515~cell differentiation in spinal cord	3	0.659341	0.221531	Hoxc10, Isl1, Hoxd10	377	32	13588	3.37898	1	0.799215	98.593
GOTERM_BP_FAT	GO:0021510~spinal cord development	3	0.659341	0.365047	Hoxc10, Isl1, Hoxd10	377	46	13588	2.35059	1	0.915634	99.9562
Annotation Cluster 75	Enrichment Score: 0.8686006646429411
Category	Term	Count	%	PValue	Genes	List Total	Pop Hits	Pop Total	Fold Enrichment	Bonferroni	Benjamini	FDR
GOTERM_BP_FAT	GO:0016265~death	21	4.61538	0.0854274	Fkbp8, Lmx1B, Tbrg4, Timm50, Gas1, Ntn1, Tgfb2, Ddit4, Akt1, Trim35, Nup62, Casp8Ap2, Tia1, Bax, Rhob, Ngfrap1, Ngfr, Myc, Tcf15, Twist1, Ccar1	377	519	13588	1.45836	1	0.582715	78.1371
GOTERM_BP_FAT	GO:0008219~cell death	20	4.3956	0.112158	Fkbp8, Lmx1B, Tbrg4, Timm50, Gas1, Ntn1, Tgfb2, Ddit4, Akt1, Trim35, Nup62, Casp8Ap2, Tia1, Bax, Rhob, Ngfrap1, Ngfr, Myc, Ccar1, Twist1	377	507	13588	1.42179	1	0.630259	86.8061
SP_PIR_KEYWORDS	Apoptosis	13	2.85714	0.131966	Fkbp8, Ntn1, Ddit4, Akt1, Trim35, Casp8Ap2, Bax, Tia1, Bub1, Rhob, Ngfrap1, Ngfr, Ccar1	443	337	17854	1.5547	1	0.492829	85.3325
GOTERM_BP_FAT	GO:0012501~programmed cell death	18	3.95604	0.164105	Fkbp8, Tbrg4, Timm50, Gas1, Ntn1, Tgfb2, Ddit4, Akt1, Trim35, Casp8Ap2, Tia1, Bax, Rhob, Ngfrap1, Ngfr, Myc, Ccar1, Twist1	377	473	13588	1.37159	1	0.721515	95.2732
GOTERM_BP_FAT	GO:0006915~apoptosis	17	3.73626	0.218768	Fkbp8, Tbrg4, Timm50, Ntn1, Tgfb2, Ddit4, Akt1, Trim35, Casp8Ap2, Tia1, Bax, Rhob, Ngfrap1, Ngfr, Myc, Ccar1, Twist1	377	465	13588	1.31768	1	0.795735	98.5055
Annotation Cluster 76	Enrichment Score: 0.8308377433221327
Category	Term	Count	%	PValue	Genes	List Total	Pop Hits	Pop Total	Fold Enrichment	Bonferroni	Benjamini	FDR
GOTERM_BP_FAT	GO:0043065~positive regulation of apoptosis	12	2.63736	0.0844757	Trim35, Bclaf1, Casp8Ap2, Bax, Tgfbr1, Tbx5, Ngfrap1, Ngfr, Id3, Myc, Ccar1, Tgfb2	377	248	13588	1.74399	1	0.580388	77.7465
GOTERM_BP_FAT	GO:0043068~positive regulation of programmed cell death	12	2.63736	0.0879193	Trim35, Bclaf1, Casp8Ap2, Bax, Tgfbr1, Tbx5, Ngfrap1, Ngfr, Id3, Myc, Ccar1, Tgfb2	377	250	13588	1.73004	1	0.582233	79.1294
GOTERM_BP_FAT	GO:0042981~regulation of apoptosis	22	4.83516	0.0887452	Bclaf1, Tcf7, Tbx5, Tgfbr1, Aars, Ints1, Col2A1, Gas1, Sox9, Tgfb2, Akt1, Trim35, Ywhah, Msx1, Nup62, Casp8Ap2, Bax, Ngfrap1, Id3, Ngfr, Myc, Ccar1	377	553	13588	1.43388	1	0.58021	79.4488
GOTERM_BP_FAT	GO:0010942~positive regulation of cell death	12	2.63736	0.0917009	Trim35, Bclaf1, Casp8Ap2, Bax, Tgfbr1, Tbx5, Ngfrap1, Ngfr, Id3, Myc, Ccar1, Tgfb2	377	252	13588	1.71631	1	0.589064	80.5547
GOTERM_BP_FAT	GO:0012502~induction of programmed cell death	9	1.97802	0.0926633	Trim35, Casp8Ap2, Bax, Tgfbr1, Tbx5, Ngfrap1, Ngfr, Myc, Tgfb2	377	167	13588	1.94241	1	0.589415	80.9026
GOTERM_BP_FAT	GO:0006917~induction of apoptosis	9	1.97802	0.0926633	Trim35, Casp8Ap2, Bax, Tgfbr1, Tbx5, Ngfrap1, Ngfr, Myc, Tgfb2	377	167	13588	1.94241	1	0.589415	80.9026
GOTERM_BP_FAT	GO:0043067~regulation of programmed cell death	22	4.83516	0.0976831	Bclaf1, Tcf7, Tbx5, Tgfbr1, Aars, Ints1, Col2A1, Gas1, Sox9, Tgfb2, Akt1, Trim35, Ywhah, Msx1, Nup62, Casp8Ap2, Bax, Ngfrap1, Id3, Ngfr, Myc, Ccar1	377	560	13588	1.41595	1	0.595434	82.6239
GOTERM_BP_FAT	GO:0010941~regulation of cell death	22	4.83516	0.101884	Bclaf1, Tcf7, Tbx5, Tgfbr1, Aars, Ints1, Col2A1, Gas1, Sox9, Tgfb2, Akt1, Trim35, Ywhah, Msx1, Nup62, Casp8Ap2, Bax, Ngfrap1, Id3, Ngfr, Myc, Ccar1	377	563	13588	1.40841	1	0.608219	83.9509
GOTERM_BP_FAT	GO:0008624~induction of apoptosis by extracellular signals	3	0.659341	0.151306	Casp8Ap2, Bax, Ngfrap1	377	25	13588	4.32509	1	0.706855	93.8774
GOTERM_BP_FAT	GO:0012501~programmed cell death	18	3.95604	0.164105	Fkbp8, Tbrg4, Timm50, Gas1, Ntn1, Tgfb2, Ddit4, Akt1, Trim35, Casp8Ap2, Tia1, Bax, Rhob, Ngfrap1, Ngfr, Myc, Ccar1, Twist1	377	473	13588	1.37159	1	0.721515	95.2732
GOTERM_BP_FAT	GO:0043066~negative regulation of apoptosis	10	2.1978	0.218105	Akt1, Ywhah, Msx1, Nup62, Bax, Tgfbr1, Aars, Ints1, Col2A1, Myc	377	239	13588	1.50805	1	0.795756	98.4838
GOTERM_BP_FAT	GO:0006915~apoptosis	17	3.73626	0.218768	Fkbp8, Tbrg4, Timm50, Ntn1, Tgfb2, Ddit4, Akt1, Trim35, Casp8Ap2, Tia1, Bax, Rhob, Ngfrap1, Ngfr, Myc, Ccar1, Twist1	377	465	13588	1.31768	1	0.795735	98.5055
GOTERM_BP_FAT	GO:0043069~negative regulation of programmed cell death	10	2.1978	0.235661	Akt1, Ywhah, Msx1, Nup62, Bax, Tgfbr1, Aars, Ints1, Col2A1, Myc	377	244	13588	1.47715	1	0.815051	98.97
GOTERM_BP_FAT	GO:0060548~negative regulation of cell death	10	2.1978	0.239693	Akt1, Ywhah, Msx1, Nup62, Bax, Tgfbr1, Aars, Ints1, Col2A1, Myc	377	245	13588	1.47112	1	0.818994	99.0587
KEGG_PATHWAY	mmu04060:Cytokine-cytokine receptor interaction	3	0.659341	0.997212	Tgfbr1, Ngfr, Tgfb2	185	244	5738	0.381347	1	0.999989	100
Annotation Cluster 77	Enrichment Score: 0.8012153834960462
Category	Term	Count	%	PValue	Genes	List Total	Pop Hits	Pop Total	Fold Enrichment	Bonferroni	Benjamini	FDR
KEGG_PATHWAY	mmu05220:Chronic myeloid leukemia	9	1.97802	0.00280621	Akt1, Ccnd1, Ctbp1, Ctbp2, Tgfbr1, Cdk4, Myc, Pik3R2, Tgfb2	185	76	5738	3.67297	0.309915	0.0453089	3.2282
KEGG_PATHWAY	mmu05210:Colorectal cancer	8	1.75824	0.0198307	Akt1, Tcf7, Ccnd1, Bax, Tgfbr1, Myc, Pik3R2, Tgfb2	185	86	5738	2.88523	0.92892	0.197745	20.8553
KEGG_PATHWAY	mmu05221:Acute myeloid leukemia	6	1.31868	0.0350342	Akt1, Tcf7, Ccnd1, Eif4Ebp1, Myc, Pik3R2	185	57	5738	3.26486	0.990972	0.269357	34.0608
KEGG_PATHWAY	mmu05216:Thyroid cancer	4	0.879121	0.0643997	Tcf7, Ccnd1, Tpr, Myc	185	29	5738	4.2781	0.999847	0.355539	54.036
KEGG_PATHWAY	mmu05212:Pancreatic cancer	6	1.31868	0.0802635	Akt1, Ccnd1, Tgfbr1, Cdk4, Pik3R2, Tgfb2	185	72	5738	2.58468	0.999984	0.394686	62.3563
KEGG_PATHWAY	mmu05213:Endometrial cancer	5	1.0989	0.0842967	Akt1, Tcf7, Ccnd1, Myc, Pik3R2	185	52	5738	2.98233	0.999991	0.396739	64.2394
KEGG_PATHWAY	mmu05200:Pathways in cancer	15	3.2967	0.153194	Ctbp1, Tcf7, Ctbp2, Fgf9, Tgfbr1, Cdk4, Tgfb2, Wnt2, Akt1, Hsp90B1, Ccnd1, Bax, Tpr, Myc, Pik3R2	185	323	5738	1.44038	1	0.530871	85.6543
KEGG_PATHWAY	mmu05218:Melanoma	5	1.0989	0.192562	Akt1, Ccnd1, Fgf9, Cdk4, Pik3R2	185	71	5738	2.18424	1	0.609806	91.7719
KEGG_PATHWAY	mmu05223:Non-small cell lung cancer	4	0.879121	0.249562	Akt1, Ccnd1, Cdk4, Pik3R2	185	54	5738	2.2975	1	0.661344	96.5003
BIOCARTA	m_RacCycDPathway:Influence of Ras and Rho proteins on G1 to S Transition	3	0.659341	0.281197	Akt1, Ccnd1, Cdk4	52	24	1171	2.8149	1	0.989756	97.6164
KEGG_PATHWAY	mmu05222:Small cell lung cancer	5	1.0989	0.290042	Akt1, Ccnd1, Cdk4, Myc, Pik3R2	185	85	5738	1.82448	1	0.70538	98.1684
KEGG_PATHWAY	mmu05215:Prostate cancer	5	1.0989	0.326544	Akt1, Tcf7, Ccnd1, Hsp90B1, Pik3R2	185	90	5738	1.72312	1	0.737643	99.0111
KEGG_PATHWAY	mmu05214:Glioma	4	0.879121	0.33771	Akt1, Ccnd1, Cdk4, Pik3R2	185	64	5738	1.93851	1	0.734623	99.1865
KEGG_PATHWAY	mmu05219:Bladder cancer	3	0.659341	0.392051	Ccnd1, Cdk4, Myc	185	42	5738	2.21544	1	0.790721	99.7006
KEGG_PATHWAY	mmu04012:ErbB signaling pathway	4	0.879121	0.532604	Akt1, Eif4Ebp1, Myc, Pik3R2	185	87	5738	1.42603	1	0.887244	99.9861
KEGG_PATHWAY	mmu04630:Jak-STAT signaling pathway	6	1.31868	0.541789	Akt1, Ccnd1, Ccnd3, Ccnd2, Myc, Pik3R2	185	152	5738	1.22432	1	0.888288	99.989
KEGG_PATHWAY	mmu05211:Renal cell carcinoma	3	0.659341	0.662804	Akt1, Pik3R2, Tgfb2	185	70	5738	1.32927	1	0.940014	99.9997
KEGG_PATHWAY	mmu04660:T cell receptor signaling pathway	3	0.659341	0.897531	Akt1, Cdk4, Pik3R2	185	118	5738	0.788548	1	0.990211	100
Annotation Cluster 78	Enrichment Score: 0.7712879752411257
Category	Term	Count	%	PValue	Genes	List Total	Pop Hits	Pop Total	Fold Enrichment	Bonferroni	Benjamini	FDR
GOTERM_BP_FAT	GO:0009968~negative regulation of signal transduction	9	1.97802	0.102596	Ccnd1, Gsc, Nup62, Fgf9, Phb2, Gas1, Ngfr, Runx2, Ddit4	377	171	13588	1.89697	1	0.609183	84.1661
GOTERM_BP_FAT	GO:0030178~negative regulation of Wnt receptor signaling pathway	3	0.659341	0.161071	Ccnd1, Gsc, Fgf9	377	26	13588	4.15874	1	0.718404	94.9724
GOTERM_BP_FAT	GO:0030111~regulation of Wnt receptor signaling pathway	3	0.659341	0.293759	Ccnd1, Gsc, Fgf9	377	39	13588	2.7725	1	0.869718	99.7319
Annotation Cluster 79	Enrichment Score: 0.7633608879471202
Category	Term	Count	%	PValue	Genes	List Total	Pop Hits	Pop Total	Fold Enrichment	Bonferroni	Benjamini	FDR
GOTERM_BP_FAT	GO:0060716~labyrinthine layer blood vessel development	3	0.659341	0.055807	Wnt2, Akt1, Fbxw8	377	14	13588	7.72338	1	0.517464	62.3825
GOTERM_BP_FAT	GO:0060674~placenta blood vessel development	3	0.659341	0.0873346	Wnt2, Akt1, Fbxw8	377	18	13588	6.00707	1	0.587286	78.9004
GOTERM_BP_FAT	GO:0001701~in utero embryonic development	11	2.41758	0.206684	Wnt2, Akt1, Ednra, Fbxw8, Sall4, Msx1, Psmc3, Nasp, Sp3, Tgfbr1, Ints1	377	267	13588	1.48489	1	0.781617	98.0591
GOTERM_BP_FAT	GO:0001892~embryonic placenta development	4	0.879121	0.238216	Wnt2, Akt1, Fbxw8, Sp3	377	61	13588	2.36344	1	0.817843	99.027
GOTERM_BP_FAT	GO:0060711~labyrinthine layer development	3	0.659341	0.252438	Wnt2, Akt1, Fbxw8	377	35	13588	3.08935	1	0.834105	99.2941
GOTERM_BP_FAT	GO:0001890~placenta development	4	0.879121	0.434038	Wnt2, Akt1, Fbxw8, Sp3	377	87	13588	1.65712	1	0.946807	99.9938
Annotation Cluster 80	Enrichment Score: 0.7448867758112558
Category	Term	Count	%	PValue	Genes	List Total	Pop Hits	Pop Total	Fold Enrichment	Bonferroni	Benjamini	FDR
GOTERM_BP_FAT	GO:0032535~regulation of cellular component size	9	1.97802	0.0788521	Akt1, Pfn1, E2F4, Arhgap5, Ccdc85B, Tmsb4X, Cdk4, Ntn1, Tgfb2	377	161	13588	2.01479	1	0.574218	75.301
GOTERM_BP_FAT	GO:0008361~regulation of cell size	7	1.53846	0.079131	Akt1, E2F4, Arhgap5, Ccdc85B, Cdk4, Ntn1, Tgfb2	377	108	13588	2.33608	1	0.569451	75.428
GOTERM_BP_FAT	GO:0045793~positive regulation of cell size	3	0.659341	0.0958852	Cdk4, Ntn1, Tgfb2	377	19	13588	5.69091	1	0.593568	82.0249
GOTERM_BP_FAT	GO:0045792~negative regulation of cell size	3	0.659341	0.433437	Akt1, Ccdc85B, Ntn1	377	53	13588	2.04014	1	0.946954	99.9937
GOTERM_BP_FAT	GO:0001558~regulation of cell growth	3	0.659341	0.727326	Ccdc85B, Ntn1, Tgfb2	377	92	13588	1.1753	1	0.996721	100
Annotation Cluster 81	Enrichment Score: 0.7067458707299146
Category	Term	Count	%	PValue	Genes	List Total	Pop Hits	Pop Total	Fold Enrichment	Bonferroni	Benjamini	FDR
GOTERM_BP_FAT	GO:0015980~energy derivation by oxidation of organic compounds	7	1.53846	0.054419	Akt1, Ppp1Ca, Uqcrc1, Ndufa7, Dld, Ppp1Cb, Mdh2	377	98	13588	2.57446	1	0.513243	61.4298
SP_PIR_KEYWORDS	glycogen metabolism	3	0.659341	0.0792763	Akt1, Ppp1Ca, Ppp1Cb	443	19	17854	6.36355	1	0.361211	67.3805
GOTERM_BP_FAT	GO:0006006~glucose metabolic process	8	1.75824	0.0939667	Akt1, Ppp1Ca, Pgls, Pgd, Hk2, Ppp1Cb, Myc, Mdh2	377	140	13588	2.05957	1	0.589364	81.3643
GOTERM_BP_FAT	GO:0019318~hexose metabolic process	9	1.97802	0.0975575	Akt1, Galk1, Ppp1Ca, Pgls, Pgd, Hk2, Ppp1Cb, Myc, Mdh2	377	169	13588	1.91942	1	0.596694	82.5826
GOTERM_BP_FAT	GO:0005996~monosaccharide metabolic process	9	1.97802	0.160666	Akt1, Galk1, Ppp1Ca, Pgls, Pgd, Hk2, Ppp1Cb, Myc, Mdh2	377	191	13588	1.69833	1	0.718825	94.9309
GOTERM_BP_FAT	GO:0044042~glucan metabolic process	3	0.659341	0.231808	Akt1, Ppp1Ca, Ppp1Cb	377	33	13588	3.27659	1	0.810197	98.8779
GOTERM_BP_FAT	GO:0006073~cellular glucan metabolic process	3	0.659341	0.231808	Akt1, Ppp1Ca, Ppp1Cb	377	33	13588	3.27659	1	0.810197	98.8779
GOTERM_BP_FAT	GO:0005977~glycogen metabolic process	3	0.659341	0.231808	Akt1, Ppp1Ca, Ppp1Cb	377	33	13588	3.27659	1	0.810197	98.8779
SP_PIR_KEYWORDS	carbohydrate metabolism	4	0.879121	0.270523	Akt1, Galk1, Ppp1Ca, Ppp1Cb	443	73	17854	2.20836	1	0.728849	98.6133
GOTERM_BP_FAT	GO:0006112~energy reserve metabolic process	3	0.659341	0.27311	Akt1, Ppp1Ca, Ppp1Cb	377	37	13588	2.92236	1	0.853107	99.5621
GOTERM_BP_FAT	GO:0044264~cellular polysaccharide metabolic process	3	0.659341	0.334755	Akt1, Ppp1Ca, Ppp1Cb	377	43	13588	2.51459	1	0.89909	99.9031
KEGG_PATHWAY	mmu04910:Insulin signaling pathway	6	1.31868	0.455898	Akt1, Ppp1Ca, Eif4Ebp1, Hk2, Ppp1Cb, Pik3R2	185	138	5738	1.34853	1	0.845617	99.9181
GOTERM_BP_FAT	GO:0005976~polysaccharide metabolic process	3	0.659341	0.727326	Akt1, Ppp1Ca, Ppp1Cb	377	92	13588	1.1753	1	0.996721	100
Annotation Cluster 82	Enrichment Score: 0.706006337646624
Category	Term	Count	%	PValue	Genes	List Total	Pop Hits	Pop Total	Fold Enrichment	Bonferroni	Benjamini	FDR
GOTERM_BP_FAT	GO:0030522~intracellular receptor-mediated signaling pathway	4	0.879121	0.0577229	Aldh1A2, Ywhah, Fkbp4, Cyp26B1	377	32	13588	4.50531	1	0.524891	63.6612
GOTERM_BP_FAT	GO:0042573~retinoic acid metabolic process	3	0.659341	0.0790301	Aldh1A2, Crabp2, Cyp26B1	377	17	13588	6.36043	1	0.57099	75.3821
GOTERM_BP_FAT	GO:0019748~secondary metabolic process	5	1.0989	0.12375	Aldh1A2, Pgls, Crabp2, Pgd, Cyp26B1	377	69	13588	2.61177	1	0.650851	89.4514
GOTERM_BP_FAT	GO:0006720~isoprenoid metabolic process	4	0.879121	0.153483	Aldh1A2, Mvd, Crabp2, Cyp26B1	377	49	13588	2.94224	1	0.70953	94.1395
GOTERM_BP_FAT	GO:0006776~vitamin A metabolic process	3	0.659341	0.161071	Aldh1A2, Crabp2, Cyp26B1	377	26	13588	4.15874	1	0.718404	94.9724
GOTERM_BP_FAT	GO:0034754~cellular hormone metabolic process	4	0.879121	0.173736	Aldh1A2, Ywhah, Crabp2, Cyp26B1	377	52	13588	2.7725	1	0.735551	96.1196
GOTERM_BP_FAT	GO:0001523~retinoid metabolic process	3	0.659341	0.180919	Aldh1A2, Crabp2, Cyp26B1	377	28	13588	3.86169	1	0.744646	96.6556
GOTERM_BP_FAT	GO:0016101~diterpenoid metabolic process	3	0.659341	0.180919	Aldh1A2, Crabp2, Cyp26B1	377	28	13588	3.86169	1	0.744646	96.6556
GOTERM_BP_FAT	GO:0006721~terpenoid metabolic process	3	0.659341	0.190976	Aldh1A2, Crabp2, Cyp26B1	377	29	13588	3.72853	1	0.7603	97.29
GOTERM_BP_FAT	GO:0006775~fat-soluble vitamin metabolic process	3	0.659341	0.242113	Aldh1A2, Crabp2, Cyp26B1	377	34	13588	3.18022	1	0.821518	99.1084
GOTERM_BP_FAT	GO:0042445~hormone metabolic process	4	0.879121	0.455897	Aldh1A2, Ywhah, Crabp2, Cyp26B1	377	90	13588	1.60189	1	0.954658	99.9968
GOTERM_BP_FAT	GO:0006766~vitamin metabolic process	3	0.659341	0.573152	Aldh1A2, Crabp2, Cyp26B1	377	69	13588	1.56706	1	0.982719	99.9999
GOTERM_BP_FAT	GO:0010817~regulation of hormone levels	4	0.879121	0.692085	Aldh1A2, Ywhah, Crabp2, Cyp26B1	377	128	13588	1.12633	1	0.995069	100
Annotation Cluster 83	Enrichment Score: 0.7045924815713638
Category	Term	Count	%	PValue	Genes	List Total	Pop Hits	Pop Total	Fold Enrichment	Bonferroni	Benjamini	FDR
GOTERM_CC_FAT	GO:0015630~microtubule cytoskeleton	21	4.61538	0.00542245	Kif11, Kif5B, Ckap5, Ccdc85B, Kif15, Smek2, Pcm1, Dctn2, Arl3, Akt1, Tbcb, Macf1, Dynll2, Nme1, Incenp, Tubb6, Myc, Ssna1, Tuba1B, Nudc, Map3K11	298	450	12504	1.95812	0.845938	0.0749739	7.14884
SP_PIR_KEYWORDS	microtubule	10	2.1978	0.098233	Kif11, Tbcb, Kif5B, Dynll2, Incenp, Kif15, Tubb6, Tuba1B, Nudc, Dctn2	443	221	17854	1.82364	1	0.414195	75.4001
GOTERM_CC_FAT	GO:0044430~cytoskeletal part	25	5.49451	0.109024	Lmnb1, Ccdc85B, Lmnb2, Akt1, Des, Homer3, Dynll2, Incenp, Tubb6, Tuba1B, Myc, Nudc, Kif11, Kif5B, Kif15, Smek2, Actn1, Pcm1, Dctn2, Arl3, Tbcb, Gria2, Nme1, Ssna1, Map3K11	298	774	12504	1.35529	1	0.548063	79.2943
GOTERM_CC_FAT	GO:0005874~microtubule	10	2.1978	0.11875	Kif11, Tbcb, Kif5B, Dynll2, Incenp, Kif15, Tubb6, Tuba1B, Nudc, Dctn2	298	240	12504	1.74832	1	0.566679	82.1736
GOTERM_BP_FAT	GO:0007017~microtubule-based process	9	1.97802	0.228945	Wnt2, Kif11, Kif5B, Ckap5, Dynll2, Kif15, Tubb6, Tuba1B, Dctn2	377	211	13588	1.53736	1	0.807879	98.8045
UP_SEQ_FEATURE	domain:Kinesin-motor	3	0.659341	0.252178	Kif11, Kif5B, Kif15	444	35	16021	3.09286	1	0.998624	99.0791
INTERPRO	IPR019821:Kinesin, motor region, conserved site	3	0.659341	0.271328	Kif11, Kif5B, Kif15	432	42	17763	2.937	1	0.988857	99.2385
INTERPRO	IPR001752:Kinesin, motor region	3	0.659341	0.289405	Kif11, Kif5B, Kif15	432	44	17763	2.8035	1	0.990832	99.4829
SMART	SM00129:KISc	3	0.659341	0.290225	Kif11, Kif5B, Kif15	223	44	9131	2.79179	1	0.939856	98.4343
GOTERM_BP_FAT	GO:0007018~microtubule-based movement	5	1.0989	0.306053	Kif11, Kif5B, Kif15, Tubb6, Tuba1B	377	101	13588	1.78428	1	0.880052	99.8012
GOTERM_MF_FAT	GO:0003777~microtubule motor activity	4	0.879121	0.306584	Kif11, Kif5B, Dynll2, Kif15	354	73	13288	2.05681	1	0.935117	99.4929
GOTERM_MF_FAT	GO:0003774~motor activity	5	1.0989	0.501325	Kif11, Kif5B, Dynll2, Kif15, Dctn2	354	138	13288	1.36003	1	0.985123	99.9956
GOTERM_CC_FAT	GO:0005875~microtubule associated complex	3	0.659341	0.542293	Kif5B, Dynll2, Dctn2	298	76	12504	1.65631	1	0.937438	99.9977
SP_PIR_KEYWORDS	motor protein	4	0.879121	0.590503	Kif11, Kif5B, Dynll2, Kif15	443	123	17854	1.31065	1	0.931887	99.9994
Annotation Cluster 84	Enrichment Score: 0.7002253092073933
Category	Term	Count	%	PValue	Genes	List Total	Pop Hits	Pop Total	Fold Enrichment	Bonferroni	Benjamini	FDR
GOTERM_MF_FAT	GO:0003779~actin binding	13	2.85714	0.0832415	Maea, Trpm7, Fscn1, Actn1, Cotl1, Pfn1, Ywhag, Ywhah, Macf1, Tmsb4X, Dbn1, Pls3, Parvb	354	288	13288	1.69437	1	0.650486	71.4739
SP_PIR_KEYWORDS	actin-binding	10	2.1978	0.109061	Pfn1, Maea, Macf1, Fscn1, Actn1, Tmsb4X, Cotl1, Dbn1, Parvb, Pls3	443	226	17854	1.7833	1	0.43476	79.118
GOTERM_MF_FAT	GO:0008092~cytoskeletal protein binding	16	3.51648	0.139375	Maea, Kif5B, Ckap5, Trpm7, Fscn1, Actn1, Cotl1, Pfn1, Ywhag, Ywhah, Macf1, Nme1, Tmsb4X, Dbn1, Pls3, Parvb	354	414	13288	1.45069	1	0.782375	88.5396
GOTERM_BP_FAT	GO:0007010~cytoskeleton organization	13	2.85714	0.194078	Maea, Kif11, Trpm7, Ckap5, Actn1, Calr, Wnt2, Pfn1, Ywhah, Tmsb4X, Dbn1, Tuba1B, Pls3	377	326	13588	1.43728	1	0.765185	97.4616
GOTERM_BP_FAT	GO:0030036~actin cytoskeleton organization	7	1.53846	0.306786	Pfn1, Trpm7, Actn1, Tmsb4X, Calr, Dbn1, Pls3	377	165	13588	1.52907	1	0.879986	99.8047
GOTERM_BP_FAT	GO:0030029~actin filament-based process	7	1.53846	0.360755	Pfn1, Trpm7, Actn1, Tmsb4X, Calr, Dbn1, Pls3	377	176	13588	1.43351	1	0.913742	99.9509
GOTERM_BP_FAT	GO:0007015~actin filament organization	3	0.659341	0.461533	Actn1, Dbn1, Pls3	377	56	13588	1.93085	1	0.956621	99.9974
Annotation Cluster 85	Enrichment Score: 0.6960113367188396
Category	Term	Count	%	PValue	Genes	List Total	Pop Hits	Pop Total	Fold Enrichment	Bonferroni	Benjamini	FDR
GOTERM_CC_FAT	GO:0044427~chromosomal part	14	3.07692	0.0399754	H1F0, Xpo1, Arid4B, Trim28, Chek1, Rangap1, Mcm2, Cenpk, Spc24, Apitd1, Incenp, Cenpb, Bub1, Tcf3	298	318	12504	1.84728	0.999999	0.302215	42.6804
GOTERM_CC_FAT	GO:0044454~nuclear chromosome part	5	1.0989	0.229113	Incenp, Trim28, Bub1, Mcm2, Tcf3	298	103	12504	2.03688	1	0.737111	97.1268
GOTERM_CC_FAT	GO:0000228~nuclear chromosome	5	1.0989	0.324055	Incenp, Trim28, Bub1, Mcm2, Tcf3	298	121	12504	1.73387	1	0.834095	99.5217
GOTERM_CC_FAT	GO:0000785~chromatin	5	1.0989	0.553979	H1F0, Incenp, Arid4B, Trim28, Tcf3	298	165	12504	1.27151	1	0.941229	99.9984
Annotation Cluster 86	Enrichment Score: 0.6404347020981421
Category	Term	Count	%	PValue	Genes	List Total	Pop Hits	Pop Total	Fold Enrichment	Bonferroni	Benjamini	FDR
GOTERM_BP_FAT	GO:0006259~DNA metabolic process	19	4.17582	0.0449751	Nasp, Smc5, Smc6, Chek1, Mcm2, Esco2, Mcm5, Obfc2B, Top1, Prmt7, Pold2, Supt16H, Ruvbl2, Parp1, Top2B, Tcf3, Myc, Top2A, Fen1	377	421	13588	1.62662	1	0.470932	54.3191
GOTERM_BP_FAT	GO:0006310~DNA recombination	5	1.0989	0.153774	Obfc2B, Smc5, Smc6, Ruvbl2, Tcf3	377	75	13588	2.40283	1	0.708823	94.1736
SP_PIR_KEYWORDS	dna recombination	3	0.659341	0.19639	Smc5, Smc6, Ruvbl2	443	33	17854	3.66386	1	0.618993	94.8465
GOTERM_BP_FAT	GO:0006281~DNA repair	9	1.97802	0.273577	Obfc2B, Smc5, Supt16H, Smc6, Ruvbl2, Chek1, Parp1, Esco2, Fen1	377	222	13588	1.46118	1	0.852755	99.5668
GOTERM_BP_FAT	GO:0006974~response to DNA damage stimulus	11	2.41758	0.274219	Obfc2B, Ccnd1, Bax, Smc5, Supt16H, Smc6, Ruvbl2, Chek1, Parp1, Esco2, Fen1	377	287	13588	1.38142	1	0.852617	99.5733
GOTERM_BP_FAT	GO:0033554~cellular response to stress	14	3.07692	0.331859	Dhx9, Aars, Smc5, Smc6, Chek1, Esco2, Obfc2B, Ccnd1, Bax, Supt16H, Txnrd1, Ruvbl2, Parp1, Fen1	377	404	13588	1.249	1	0.897311	99.8957
SP_PIR_KEYWORDS	dna repair	6	1.31868	0.427171	Obfc2B, Smc5, Supt16H, Smc6, Chek1, Parp1	443	173	17854	1.39777	1	0.850621	99.9478
SP_PIR_KEYWORDS	DNA damage	6	1.31868	0.520972	Obfc2B, Smc5, Supt16H, Smc6, Chek1, Parp1	443	194	17854	1.24647	1	0.897385	99.9954
Annotation Cluster 87	Enrichment Score: 0.6344296508133794
Category	Term	Count	%	PValue	Genes	List Total	Pop Hits	Pop Total	Fold Enrichment	Bonferroni	Benjamini	FDR
GOTERM_BP_FAT	GO:0010035~response to inorganic substance	6	1.31868	0.111512	Ccnd1, Gria2, Txnrd1, Col1A1, Asna1, Park7	377	92	13588	2.35059	1	0.629679	86.6417
GOTERM_BP_FAT	GO:0042542~response to hydrogen peroxide	3	0.659341	0.141665	Txnrd1, Col1A1, Park7	377	24	13588	4.50531	1	0.691511	92.5792
GOTERM_BP_FAT	GO:0000302~response to reactive oxygen species	3	0.659341	0.262773	Txnrd1, Col1A1, Park7	377	36	13588	3.00354	1	0.843926	99.4431
GOTERM_BP_FAT	GO:0006979~response to oxidative stress	3	0.659341	0.698415	Txnrd1, Col1A1, Park7	377	87	13588	1.24284	1	0.995268	100
Annotation Cluster 88	Enrichment Score: 0.6311461850070087
Category	Term	Count	%	PValue	Genes	List Total	Pop Hits	Pop Total	Fold Enrichment	Bonferroni	Benjamini	FDR
KEGG_PATHWAY	mmu00630:Glyoxylate and dicarboxylate metabolism	3	0.659341	0.0914644	Mthfd2, Mthfd1L, Mdh2	185	16	5738	5.81554	0.999997	0.409961	67.3748
GOTERM_BP_FAT	GO:0006006~glucose metabolic process	8	1.75824	0.0939667	Akt1, Ppp1Ca, Pgls, Pgd, Hk2, Ppp1Cb, Myc, Mdh2	377	140	13588	2.05957	1	0.589364	81.3643
GOTERM_BP_FAT	GO:0019318~hexose metabolic process	9	1.97802	0.0975575	Akt1, Galk1, Ppp1Ca, Pgls, Pgd, Hk2, Ppp1Cb, Myc, Mdh2	377	169	13588	1.91942	1	0.596694	82.5826
GOTERM_BP_FAT	GO:0005996~monosaccharide metabolic process	9	1.97802	0.160666	Akt1, Galk1, Ppp1Ca, Pgls, Pgd, Hk2, Ppp1Cb, Myc, Mdh2	377	191	13588	1.69833	1	0.718825	94.9309
GOTERM_BP_FAT	GO:0006007~glucose catabolic process	4	0.879121	0.173736	Pgls, Pgd, Hk2, Mdh2	377	52	13588	2.7725	1	0.735551	96.1196
GOTERM_BP_FAT	GO:0019320~hexose catabolic process	4	0.879121	0.173736	Pgls, Pgd, Hk2, Mdh2	377	52	13588	2.7725	1	0.735551	96.1196
GOTERM_BP_FAT	GO:0046365~monosaccharide catabolic process	4	0.879121	0.187633	Pgls, Pgd, Hk2, Mdh2	377	54	13588	2.66981	1	0.754812	97.0929
GOTERM_BP_FAT	GO:0044275~cellular carbohydrate catabolic process	4	0.879121	0.230838	Pgls, Pgd, Hk2, Mdh2	377	60	13588	2.40283	1	0.809766	98.8535
GOTERM_BP_FAT	GO:0046164~alcohol catabolic process	4	0.879121	0.268085	Pgls, Pgd, Hk2, Mdh2	377	65	13588	2.218	1	0.848773	99.5076
GOTERM_BP_FAT	GO:0006732~coenzyme metabolic process	6	1.31868	0.362559	Mthfd2, Pgls, Pgd, Mthfd1L, Mdh2, Dcakd	377	143	13588	1.51227	1	0.914444	99.9532
GOTERM_BP_FAT	GO:0016052~carbohydrate catabolic process	4	0.879121	0.38943	Pgls, Pgd, Hk2, Mdh2	377	81	13588	1.77987	1	0.928561	99.9775
GOTERM_BP_FAT	GO:0009108~coenzyme biosynthetic process	3	0.659341	0.532269	Mthfd2, Mthfd1L, Dcakd	377	64	13588	1.68949	1	0.975247	99.9998
GOTERM_BP_FAT	GO:0051186~cofactor metabolic process	6	1.31868	0.569575	Mthfd2, Pgls, Pgd, Mthfd1L, Mdh2, Dcakd	377	182	13588	1.18821	1	0.98239	99.9999
GOTERM_BP_FAT	GO:0051188~cofactor biosynthetic process	3	0.659341	0.721738	Mthfd2, Mthfd1L, Dcakd	377	91	13588	1.18821	1	0.996463	100
Annotation Cluster 89	Enrichment Score: 0.6277947120145144
Category	Term	Count	%	PValue	Genes	List Total	Pop Hits	Pop Total	Fold Enrichment	Bonferroni	Benjamini	FDR
SP_PIR_KEYWORDS	heterotrimer	4	0.879121	0.0207364	Gnai2, Gnb1, Gna11, Col1A1	443	24	17854	6.71708	0.999028	0.139964	24.7392
GOTERM_CC_FAT	GO:0019897~extrinsic to plasma membrane	5	1.0989	0.041316	Gnai3, Gnb2, Gnb1, Gna11, Mfge8	298	55	12504	3.81452	1	0.304321	43.7628
GOTERM_CC_FAT	GO:0005834~heterotrimeric G-protein complex	4	0.879121	0.0496591	Gnai3, Gnb2, Gnb1, Gna11	298	35	12504	4.7954	1	0.347767	50.0841
SP_PIR_KEYWORDS	signal transduction	3	0.659341	0.0519083	Gnai2, Gnb1, Gna11	443	15	17854	8.0605	1	0.262287	51.4694
GOTERM_MF_FAT	GO:0003924~GTPase activity	8	1.75824	0.0544901	Gnai3, Gnai2, Gnb2, Gnb1, Gna11, Tubb6, Ehd1, Tuba1B	354	128	13288	2.34605	1	0.556585	55.455
INTERPRO	IPR001019:Guanine nucleotide binding protein (G-protein), alpha subunit	3	0.659341	0.0563286	Gnai3, Gnai2, Gna11	432	16	17763	7.70964	1	0.68814	59.0742
PIR_SUPERFAMILY	PIRSF002400:GTP-binding regulatory protein Gs alpha chain	3	0.659341	0.0601722	Gnai3, Gnai2, Gna11	236	14	8136	7.38741	1	0.934141	55.631
KEGG_PATHWAY	mmu04730:Long-term depression	5	1.0989	0.199168	Ppp2R1A, Gnai3, Gria2, Gnai2, Gna11	185	72	5738	2.1539	1	0.611605	92.5245
SP_PIR_KEYWORDS	GTP binding	3	0.659341	0.214582	Gnai2, Gnb1, Gna11	443	35	17854	3.4545	1	0.645946	96.2223
GOTERM_MF_FAT	GO:0005525~GTP binding	13	2.85714	0.232855	Gnai3, Gnai2, Gna11, Fkbp4, Arl3, Rasl11B, Arhgap5, Arf1, Rhob, Tubb6, Ehd1, Eif2B2, Tuba1B	354	354	13288	1.37847	1	0.894002	97.8198
GOTERM_MF_FAT	GO:0032561~guanyl ribonucleotide binding	13	2.85714	0.26	Gnai3, Gnai2, Gna11, Fkbp4, Arl3, Rasl11B, Arhgap5, Arf1, Rhob, Tubb6, Ehd1, Eif2B2, Tuba1B	354	363	13288	1.34429	1	0.90149	98.7038
GOTERM_MF_FAT	GO:0019001~guanyl nucleotide binding	13	2.85714	0.26	Gnai3, Gnai2, Gna11, Fkbp4, Arl3, Rasl11B, Arhgap5, Arf1, Rhob, Tubb6, Ehd1, Eif2B2, Tuba1B	354	363	13288	1.34429	1	0.90149	98.7038
KEGG_PATHWAY	mmu04540:Gap junction	5	1.0989	0.297303	Gnai3, Gnai2, Gna11, Tubb6, Tuba1B	185	86	5738	1.80327	1	0.706424	98.3756
UP_SEQ_FEATURE	nucleotide phosphate-binding region:GTP	9	1.97802	0.483618	Rasl11B, Gnai3, Gnai2, Arf1, Gna11, Rhob, Tubb6, Tuba1B, Arl3	444	274	16021	1.18522	1	0.999997	99.9977
SP_PIR_KEYWORDS	gtp-binding	9	1.97802	0.509295	Rasl11B, Gnai3, Gnai2, Arf1, Gna11, Rhob, Tubb6, Tuba1B, Arl3	443	313	17854	1.15886	1	0.89399	99.9936
GOTERM_BP_FAT	GO:0019932~second-messenger-mediated signaling	4	0.879121	0.638272	Eif4Ebp2, Gnai2, Gnb1, Gna11	377	118	13588	1.22178	1	0.990589	100
KEGG_PATHWAY	mmu04062:Chemokine signaling pathway	6	1.31868	0.700799	Akt1, Gnai3, Gnai2, Gnb2, Gnb1, Pik3R2	185	182	5738	1.02251	1	0.950472	99.9999
GOTERM_BP_FAT	GO:0043085~positive regulation of catalytic activity	7	1.53846	0.733067	Serinc2, Gnai2, Casp8Ap2, Gnb1, Bax, Gna11, Myc	377	261	13588	0.966655	1	0.996845	100
INTERPRO	IPR005225:Small GTP-binding protein	4	0.879121	0.763787	Rasl11B, Arf1, Rhob, Arl3	432	164	17763	1.00288	1	1	100
GOTERM_BP_FAT	GO:0007264~small GTPase mediated signal transduction	6	1.31868	0.845656	Rasl11B, Arhgap5, Arf1, Rhob, Arhgdia, Arl3	377	258	13588	0.838196	1	0.999527	100
GOTERM_BP_FAT	GO:0044093~positive regulation of molecular function	7	1.53846	0.854605	Serinc2, Gnai2, Casp8Ap2, Gnb1, Bax, Gna11, Myc	377	306	13588	0.8245	1	0.999624	100
SP_PIR_KEYWORDS	transducer	6	1.31868	1	Ednra, Gnai3, Gnai2, Gnb2, Gnb1, Gna11	443	1467	17854	0.164836	1	1	100
GOTERM_BP_FAT	GO:0007186~G-protein coupled receptor protein signaling pathway	7	1.53846	1	Ednra, Gnai3, Gnai2, Gnb2, Homer3, Gnb1, Gna11	377	1877	13588	0.134415	1	1	100
Annotation Cluster 90	Enrichment Score: 0.6246698305887757
Category	Term	Count	%	PValue	Genes	List Total	Pop Hits	Pop Total	Fold Enrichment	Bonferroni	Benjamini	FDR
SP_PIR_KEYWORDS	ribonucleoprotein	15	3.2967	0.00665823	Mrpl53, Raly, Prpf31, Rrp9, Rps5, Rps3, Pcbp4, Pcbp1, Mrpl17, Pcbp2, Rpl8, Snrpb, Lsm4, Imp4, Mrpl43	443	266	17854	2.2727	0.890436	0.0629668	8.66255
GOTERM_CC_FAT	GO:0033279~ribosomal subunit	4	0.879121	0.206651	Mrpl17, Rps5, Mrpl43, Rps3	298	66	12504	2.54301	1	0.717483	95.7486
SP_PIR_KEYWORDS	ribosomal protein	6	1.31868	0.446599	Mrpl53, Mrpl17, Rpl8, Rps5, Mrpl43, Rps3	443	177	17854	1.36619	1	0.861685	99.9673
GOTERM_CC_FAT	GO:0005840~ribosome	6	1.31868	0.481334	Mrpl53, Mrpl17, Rpl8, Rps5, Mrpl43, Rps3	298	192	12504	1.31124	1	0.90719	99.9871
GOTERM_MF_FAT	GO:0003735~structural constituent of ribosome	4	0.879121	0.769155	Mrpl17, Rpl8, Rps5, Rps3	354	151	13288	0.99435	1	0.999459	100
KEGG_PATHWAY	mmu03010:Ribosome	3	0.659341	0.78525	Rpl8, Rps5, Rps3	185	89	5738	1.04549	1	0.966096	100
Annotation Cluster 91	Enrichment Score: 0.6134844159237823
Category	Term	Count	%	PValue	Genes	List Total	Pop Hits	Pop Total	Fold Enrichment	Bonferroni	Benjamini	FDR
GOTERM_BP_FAT	GO:0034470~ncRNA processing	8	1.75824	0.148912	Pus1, Exosc7, Exosc4, Aars, Ints1, Rrp9, Imp4, Lin28B	377	158	13588	1.82493	1	0.702083	93.5766
SP_PIR_KEYWORDS	rrna processing	4	0.879121	0.179402	Exosc7, Exosc4, Rrp9, Imp4	443	59	17854	2.73237	1	0.58704	93.1557
GOTERM_BP_FAT	GO:0022613~ribonucleoprotein complex biogenesis	7	1.53846	0.179661	Prpf31, Prmt7, Exosc7, Exosc4, Rrs1, Rrp9, Imp4	377	137	13588	1.84158	1	0.744557	96.5671
GOTERM_BP_FAT	GO:0006364~rRNA processing	4	0.879121	0.336409	Exosc7, Exosc4, Rrp9, Imp4	377	74	13588	1.94824	1	0.899791	99.9072
GOTERM_BP_FAT	GO:0016072~rRNA metabolic process	4	0.879121	0.344018	Exosc7, Exosc4, Rrp9, Imp4	377	75	13588	1.92226	1	0.904034	99.9237
GOTERM_BP_FAT	GO:0042254~ribosome biogenesis	5	1.0989	0.375348	Exosc7, Exosc4, Rrs1, Rrp9, Imp4	377	112	13588	1.60904	1	0.921062	99.9668
Annotation Cluster 92	Enrichment Score: 0.5683783671442388
Category	Term	Count	%	PValue	Genes	List Total	Pop Hits	Pop Total	Fold Enrichment	Bonferroni	Benjamini	FDR
GOTERM_CC_FAT	GO:0044433~cytoplasmic vesicle part	7	1.53846	0.0255118	Wnt2, Clta, Ap1S1, Gria2, Dld, Actn1, Tmsb4X	298	95	12504	3.09177	0.999862	0.218815	29.7099
GOTERM_CC_FAT	GO:0030659~cytoplasmic vesicle membrane	5	1.0989	0.152327	Wnt2, Clta, Ap1S1, Gria2, Actn1	298	87	12504	2.41148	1	0.637658	89.5065
GOTERM_CC_FAT	GO:0012506~vesicle membrane	5	1.0989	0.199162	Wnt2, Clta, Ap1S1, Gria2, Actn1	298	97	12504	2.16287	1	0.714205	95.1673
GOTERM_CC_FAT	GO:0030665~clathrin coated vesicle membrane	3	0.659341	0.210384	Clta, Ap1S1, Gria2	298	36	12504	3.49664	1	0.71352	96.0135
GOTERM_CC_FAT	GO:0016023~cytoplasmic membrane-bounded vesicle	13	2.85714	0.28133	Clta, Pdia6, Actn1, Ywhae, Wnt2, Lamp1, Hsp90B1, Ap1S1, Gria2, Fnbp1L, Dld, Tmsb4X, Ehd1	298	414	12504	1.31758	1	0.793686	98.8964
GOTERM_CC_FAT	GO:0031988~membrane-bounded vesicle	13	2.85714	0.297224	Clta, Pdia6, Actn1, Ywhae, Wnt2, Lamp1, Hsp90B1, Ap1S1, Gria2, Fnbp1L, Dld, Tmsb4X, Ehd1	298	420	12504	1.29875	1	0.805953	99.1865
GOTERM_CC_FAT	GO:0030662~coated vesicle membrane	3	0.659341	0.359826	Clta, Ap1S1, Gria2	298	53	12504	2.37508	1	0.846044	99.7722
GOTERM_CC_FAT	GO:0031410~cytoplasmic vesicle	14	3.07692	0.43733	Clta, Pdia6, Actn1, Ywhae, Wnt2, Lamp1, Hsp90B1, Ap1S1, Gria2, Fnbp1L, Dld, Vamp3, Tmsb4X, Ehd1	298	508	12504	1.15637	1	0.886263	99.9608
GOTERM_CC_FAT	GO:0031982~vesicle	14	3.07692	0.460177	Clta, Pdia6, Actn1, Ywhae, Wnt2, Lamp1, Hsp90B1, Ap1S1, Gria2, Fnbp1L, Dld, Vamp3, Tmsb4X, Ehd1	298	519	12504	1.13186	1	0.900264	99.9777
GOTERM_CC_FAT	GO:0030136~clathrin-coated vesicle	3	0.659341	0.7115	Clta, Ap1S1, Gria2	298	104	12504	1.21038	1	0.982965	100
GOTERM_CC_FAT	GO:0030135~coated vesicle	3	0.659341	0.797626	Clta, Ap1S1, Gria2	298	124	12504	1.01515	1	0.992277	100
Annotation Cluster 93	Enrichment Score: 0.5597847134030007
Category	Term	Count	%	PValue	Genes	List Total	Pop Hits	Pop Total	Fold Enrichment	Bonferroni	Benjamini	FDR
GOTERM_MF_FAT	GO:0050662~coenzyme binding	7	1.53846	0.252663	Ctbp1, Ctbp2, Ndufa9, Pgd, Dld, Txnrd1, Parp1	354	160	13288	1.64223	1	0.904479	98.5054
GOTERM_MF_FAT	GO:0048037~cofactor binding	9	1.97802	0.253258	Ctbp1, Shmt2, Ctbp2, Ndufa9, Pgd, Dld, Txnrd1, Psat1, Parp1	354	226	13288	1.49483	1	0.901533	98.5225
GOTERM_MF_FAT	GO:0051287~NAD or NADH binding	3	0.659341	0.326994	Ctbp1, Ctbp2, Parp1	354	44	13288	2.55932	1	0.945822	99.6705
Annotation Cluster 94	Enrichment Score: 0.5494664579451976
Category	Term	Count	%	PValue	Genes	List Total	Pop Hits	Pop Total	Fold Enrichment	Bonferroni	Benjamini	FDR
GOTERM_BP_FAT	GO:0021549~cerebellum development	3	0.659341	0.252438	Lmx1B, Aars, Gas1	377	35	13588	3.08935	1	0.834105	99.2941
GOTERM_BP_FAT	GO:0030902~hindbrain development	4	0.879121	0.283183	Aldh1A2, Lmx1B, Aars, Gas1	377	67	13588	2.15179	1	0.860512	99.6547
GOTERM_BP_FAT	GO:0022037~metencephalon development	3	0.659341	0.314324	Lmx1B, Aars, Gas1	377	41	13588	2.63725	1	0.885021	99.8379
Annotation Cluster 95	Enrichment Score: 0.5294302955602886
Category	Term	Count	%	PValue	Genes	List Total	Pop Hits	Pop Total	Fold Enrichment	Bonferroni	Benjamini	FDR
GOTERM_BP_FAT	GO:0043281~regulation of caspase activity	4	0.879121	0.160149	Casp8Ap2, Bax, Ints1, Myc	377	50	13588	2.8834	1	0.718977	94.8775
GOTERM_BP_FAT	GO:0052548~regulation of endopeptidase activity	4	0.879121	0.160149	Casp8Ap2, Bax, Ints1, Myc	377	50	13588	2.8834	1	0.718977	94.8775
GOTERM_BP_FAT	GO:0052547~regulation of peptidase activity	4	0.879121	0.166902	Casp8Ap2, Bax, Ints1, Myc	377	51	13588	2.82686	1	0.725354	95.5353
GOTERM_BP_FAT	GO:0051345~positive regulation of hydrolase activity	5	1.0989	0.18622	Casp8Ap2, Gnb1, Bax, Gna11, Myc	377	81	13588	2.22484	1	0.753184	97.0056
GOTERM_BP_FAT	GO:0006919~activation of caspase activity	3	0.659341	0.231808	Casp8Ap2, Bax, Myc	377	33	13588	3.27659	1	0.810197	98.8779
GOTERM_BP_FAT	GO:0043280~positive regulation of caspase activity	3	0.659341	0.262773	Casp8Ap2, Bax, Myc	377	36	13588	3.00354	1	0.843926	99.4431
GOTERM_BP_FAT	GO:0010952~positive regulation of peptidase activity	3	0.659341	0.262773	Casp8Ap2, Bax, Myc	377	36	13588	3.00354	1	0.843926	99.4431
GOTERM_BP_FAT	GO:0051336~regulation of hydrolase activity	6	1.31868	0.635271	Casp8Ap2, Gnb1, Bax, Gna11, Ints1, Myc	377	196	13588	1.10334	1	0.990338	100
GOTERM_BP_FAT	GO:0043085~positive regulation of catalytic activity	7	1.53846	0.733067	Serinc2, Gnai2, Casp8Ap2, Gnb1, Bax, Gna11, Myc	377	261	13588	0.966655	1	0.996845	100
GOTERM_BP_FAT	GO:0044093~positive regulation of molecular function	7	1.53846	0.854605	Serinc2, Gnai2, Casp8Ap2, Gnb1, Bax, Gna11, Myc	377	306	13588	0.8245	1	0.999624	100
Annotation Cluster 96	Enrichment Score: 0.524208500794621
Category	Term	Count	%	PValue	Genes	List Total	Pop Hits	Pop Total	Fold Enrichment	Bonferroni	Benjamini	FDR
GOTERM_CC_FAT	GO:0043005~neuron projection	9	1.97802	0.228027	Ppp1Ca, Gria2, Kif5B, Crmp1, Robo2, Basp1, Myc, Dctn2, Tgfb2	298	245	12504	1.54138	1	0.740482	97.0711
GOTERM_CC_FAT	GO:0030427~site of polarized growth	3	0.659341	0.342526	Gria2, Basp1, Dctn2	298	51	12504	2.46822	1	0.831521	99.6722
GOTERM_CC_FAT	GO:0030426~growth cone	3	0.659341	0.342526	Gria2, Basp1, Dctn2	298	51	12504	2.46822	1	0.831521	99.6722
Annotation Cluster 97	Enrichment Score: 0.508192813840458
Category	Term	Count	%	PValue	Genes	List Total	Pop Hits	Pop Total	Fold Enrichment	Bonferroni	Benjamini	FDR
GOTERM_MF_FAT	GO:0004722~protein serine/threonine phosphatase activity	4	0.879121	0.0606915	Ppm1G, Ppp1Ca, Timm50, Ppp1Cb	354	34	13288	4.41609	1	0.566999	59.4908
GOTERM_BP_FAT	GO:0006470~protein amino acid dephosphorylation	6	1.31868	0.20857	Ppm1G, Ppp1Ca, Timm50, Dusp9, Ppp1Cb, Dusp6	377	114	13588	1.89697	1	0.783828	98.1362
GOTERM_MF_FAT	GO:0004721~phosphoprotein phosphatase activity	7	1.53846	0.217851	Ppm1G, Ppp1Ca, Timm50, Dusp9, Ppp1Cb, Phpt1, Dusp6	354	152	13288	1.72866	1	0.883758	97.1167
SP_PIR_KEYWORDS	protein phosphatase	5	1.0989	0.346081	Ppm1G, Ppp1Ca, Ppp1Cb, Phpt1, Dusp6	443	120	17854	1.67927	1	0.793978	99.6853
GOTERM_BP_FAT	GO:0016311~dephosphorylation	6	1.31868	0.351546	Ppm1G, Ppp1Ca, Timm50, Dusp9, Ppp1Cb, Dusp6	377	141	13588	1.53372	1	0.90803	99.9373
GOTERM_MF_FAT	GO:0030145~manganese ion binding	6	1.31868	0.357516	Lap3, Ppm1G, Ppp1Ca, Tgfbr1, Ppp1Cb, Fen1	354	148	13288	1.52176	1	0.957804	99.8314
SP_PIR_KEYWORDS	manganese	5	1.0989	0.484656	Lap3, Ppm1G, Ppp1Ca, Tgfbr1, Ppp1Cb	443	145	17854	1.38974	1	0.878747	99.9876
GOTERM_MF_FAT	GO:0016791~phosphatase activity	7	1.53846	0.609135	Ppm1G, Ppp1Ca, Timm50, Dusp9, Ppp1Cb, Phpt1, Dusp6	354	238	13288	1.10402	1	0.99502	99.9999
GOTERM_MF_FAT	GO:0004725~protein tyrosine phosphatase activity	3	0.659341	0.753567	Timm50, Dusp9, Dusp6	354	101	13288	1.11495	1	0.999396	100
Annotation Cluster 98	Enrichment Score: 0.5064701576998096
Category	Term	Count	%	PValue	Genes	List Total	Pop Hits	Pop Total	Fold Enrichment	Bonferroni	Benjamini	FDR
GOTERM_MF_FAT	GO:0003887~DNA-directed DNA polymerase activity	3	0.659341	0.189005	Pole4, Pold2, Esco2	354	30	13288	3.75367	1	0.860653	95.1371
GOTERM_MF_FAT	GO:0034061~DNA polymerase activity	3	0.659341	0.365816	Pole4, Pold2, Esco2	354	48	13288	2.34605	1	0.957963	99.8602
GOTERM_MF_FAT	GO:0016779~nucleotidyltransferase activity	5	1.0989	0.437374	Pole4, Polr2F, Pold2, Polr2I, Esco2	354	127	13288	1.47782	1	0.976383	99.9752
Annotation Cluster 99	Enrichment Score: 0.4987921453051666
Category	Term	Count	%	PValue	Genes	List Total	Pop Hits	Pop Total	Fold Enrichment	Bonferroni	Benjamini	FDR
BIOCARTA	m_caspasePathway:Caspase Cascade in Apoptosis	3	0.659341	0.231646	Lmnb1, Lmnb2, Parp1	52	21	1171	3.21703	1	0.984677	94.9314
BIOCARTA	m_fasPathway:FAS signaling pathway ( CD95 )	3	0.659341	0.363088	Lmnb1, Lmnb2, Parp1	52	29	1171	2.32958	1	0.993312	99.3936
BIOCARTA	m_tnfr1Pathway:TNFR1 Signaling Pathway	3	0.659341	0.379129	Lmnb1, Lmnb2, Parp1	52	30	1171	2.25192	1	0.991849	99.5457
Annotation Cluster 100	Enrichment Score: 0.4947501154218314
Category	Term	Count	%	PValue	Genes	List Total	Pop Hits	Pop Total	Fold Enrichment	Bonferroni	Benjamini	FDR
UP_SEQ_FEATURE	domain:CH 1	4	0.879121	0.0192902	Macf1, Actn1, Parvb, Pls3	444	21	16021	6.87302	1	0.600929	26.9637
UP_SEQ_FEATURE	domain:CH 2	4	0.879121	0.0192902	Macf1, Actn1, Parvb, Pls3	444	21	16021	6.87302	1	0.600929	26.9637
INTERPRO	IPR001589:Actinin-type, actin-binding, conserved site	4	0.879121	0.0243879	Macf1, Actn1, Ints1, Pls3	432	26	17763	6.32585	1	0.542734	31.6458
INTERPRO	IPR001715:Calponin-like actin-binding	4	0.879121	0.228289	Macf1, Actn1, Parvb, Pls3	432	68	17763	2.41871	1	0.977921	98.1562
SMART	SM00033:CH	4	0.879121	0.228987	Macf1, Actn1, Parvb, Pls3	223	68	9131	2.4086	1	0.906459	95.729
INTERPRO	IPR018247:EF-HAND 1	7	1.53846	0.405288	Macf1, Smoc1, Actn1, Sparc, Ehd1, Prkcsh, Pls3	432	211	17763	1.36411	1	0.998479	99.9667
UP_SEQ_FEATURE	calcium-binding region:1	5	1.0989	0.424888	Macf1, Smoc1, Actn1, Prkcsh, Pls3	444	120	16021	1.50347	1	0.999981	99.9867
UP_SEQ_FEATURE	calcium-binding region:2	4	0.879121	0.590084	Macf1, Smoc1, Actn1, Pls3	444	110	16021	1.31212	1	1	99.9999
INTERPRO	IPR011992:EF-Hand type	6	1.31868	0.648096	Macf1, Smoc1, Actn1, Sparc, Ehd1, Pls3	432	227	17763	1.08682	1	0.999992	100
UP_SEQ_FEATURE	domain:EF-hand 2	5	1.0989	0.649437	Macf1, Smoc1, Actn1, Prkcsh, Pls3	444	160	16021	1.1276	1	1	100
UP_SEQ_FEATURE	domain:EF-hand 1	5	1.0989	0.654254	Macf1, Smoc1, Actn1, Prkcsh, Pls3	444	161	16021	1.1206	1	1	100
SP_PIR_KEYWORDS	calcium	17	3.73626	0.72892	Clta, Fkbp8, Trpm7, Scube1, Actn1, Tkt, Sparc, Calr, Prkcsh, Hsp90B1, Macf1, Smoc1, Vcan, Mfap4, Ehd1, Pls3, Cdh11	443	731	17854	0.937267	1	0.974308	100
INTERPRO	IPR018249:EF-HAND 2	5	1.0989	0.736373	Macf1, Actn1, Ehd1, Prkcsh, Pls3	432	205	17763	1.00288	1	0.999999	100
INTERPRO	IPR018248:EF hand	3	0.659341	0.833731	Macf1, Actn1, Pls3	432	132	17763	0.934501	1	1	100
INTERPRO	IPR002048:Calcium-binding EF-hand	3	0.659341	0.848779	Macf1, Actn1, Pls3	432	137	17763	0.900395	1	1	100
SMART	SM00054:EFh	3	0.659341	0.850585	Macf1, Actn1, Pls3	223	137	9131	0.896632	1	0.999996	100
GOTERM_MF_FAT	GO:0005509~calcium ion binding	18	3.95604	0.905551	Clta, Fkbp8, Trpm7, Scube1, Actn1, Tkt, Dlk1, Sparc, Calr, Prkcsh, Hsp90B1, Macf1, Smoc1, Vcan, Ehd1, Mfap4, Pls3, Cdh11	354	840	13288	0.804358	1	0.999983	100
Annotation Cluster 101	Enrichment Score: 0.48546204734804366
Category	Term	Count	%	PValue	Genes	List Total	Pop Hits	Pop Total	Fold Enrichment	Bonferroni	Benjamini	FDR
INTERPRO	IPR001440:Tetratricopeptide TPR-1	5	1.0989	0.199528	Fkbp8, Ttc14, Nasp, Fkbp4, Stub1	432	95	17763	2.16411	1	0.966493	96.7596
GOTERM_MF_FAT	GO:0031072~heat shock protein binding	4	0.879121	0.206454	Nasp, Fkbp4, Stub1, Cdc37	354	59	13288	2.54486	1	0.881856	96.4472
INTERPRO	IPR019734:Tetratricopeptide repeat	5	1.0989	0.288782	Fkbp8, Ttc14, Nasp, Fkbp4, Stub1	432	112	17763	1.83563	1	0.991429	99.4759
SMART	SM00028:TPR	5	1.0989	0.289802	Fkbp8, Ttc14, Nasp, Fkbp4, Stub1	223	112	9131	1.82795	1	0.94786	98.4229
INTERPRO	IPR013026:Tetratricopeptide region	5	1.0989	0.299686	Fkbp8, Ttc14, Nasp, Fkbp4, Stub1	432	114	17763	1.80342	1	0.991868	99.5869
INTERPRO	IPR011990:Tetratricopeptide-like helical	6	1.31868	0.299963	Fkbp8, Ttc14, Nasp, Fkbp4, Prpf39, Stub1	432	150	17763	1.64472	1	0.991258	99.5895
UP_SEQ_FEATURE	repeat:TPR 3	5	1.0989	0.412444	Fkbp8, Ttc14, Nasp, Fkbp4, Stub1	444	118	16021	1.52895	1	0.999976	99.9812
SP_PIR_KEYWORDS	tpr repeat	5	1.0989	0.463078	Fkbp8, Ttc14, Nasp, Fkbp4, Stub1	443	141	17854	1.42917	1	0.869726	99.9783
UP_SEQ_FEATURE	repeat:TPR 2	5	1.0989	0.485919	Fkbp8, Ttc14, Nasp, Fkbp4, Stub1	444	130	16021	1.38782	1	0.999996	99.9978
UP_SEQ_FEATURE	repeat:TPR 1	5	1.0989	0.485919	Fkbp8, Ttc14, Nasp, Fkbp4, Stub1	444	130	16021	1.38782	1	0.999996	99.9978
Annotation Cluster 102	Enrichment Score: 0.4514221075762382
Category	Term	Count	%	PValue	Genes	List Total	Pop Hits	Pop Total	Fold Enrichment	Bonferroni	Benjamini	FDR
GOTERM_BP_FAT	GO:0006796~phosphate metabolic process	35	7.69231	0.0248183	Atp5D, Prpf4B, Uqcrc1, Mvd, Gnai2, Atp5B, Hk2, Chek1, Cad, Timm50, Clk1, Atp5G3, Tgfb2, Wnt2, Akt1, Galk1, Bub1, Trpm7, Csnk1G2, Tgfbr1, Trim28, Ndufa7, Pim3, Cdk4, Ppp1Cb, Ppa1, Ppm1G, Ppp1Ca, Ccnd1, Nme1, Dld, Atp5A1, Dusp9, Dusp6, Map3K11	377	866	13588	1.45668	1	0.343204	34.8113
GOTERM_BP_FAT	GO:0006793~phosphorus metabolic process	35	7.69231	0.0248183	Atp5D, Prpf4B, Uqcrc1, Mvd, Gnai2, Atp5B, Hk2, Chek1, Cad, Timm50, Clk1, Atp5G3, Tgfb2, Wnt2, Akt1, Galk1, Bub1, Trpm7, Csnk1G2, Tgfbr1, Trim28, Ndufa7, Pim3, Cdk4, Ppp1Cb, Ppa1, Ppm1G, Ppp1Ca, Ccnd1, Nme1, Dld, Atp5A1, Dusp9, Dusp6, Map3K11	377	866	13588	1.45668	1	0.343204	34.8113
GOTERM_BP_FAT	GO:0016310~phosphorylation	28	6.15385	0.0656061	Atp5D, Uqcrc1, Prpf4B, Gnai2, Mvd, Atp5B, Hk2, Cad, Chek1, Clk1, Atp5G3, Tgfb2, Wnt2, Akt1, Galk1, Bub1, Trpm7, Csnk1G2, Tgfbr1, Trim28, Ndufa7, Pim3, Cdk4, Ccnd1, Nme1, Dld, Atp5A1, Map3K11	377	718	13588	1.40555	1	0.550836	68.5044
GOTERM_MF_FAT	GO:0004672~protein kinase activity	20	4.3956	0.209038	Polr2F, Prpf4B, Trpm7, Csnk1G2, Tgfbr1, Trim28, Polr2I, Tbrg4, Cad, Pim3, Chek1, Clk1, Cdk4, Wnt2, Akt1, Ednra, Ccnd1, Ccnd3, Bub1, Map3K11	354	583	13288	1.28771	1	0.880841	96.6106
UP_SEQ_FEATURE	binding site:ATP	19	4.17582	0.250795	Prpf4B, Trpm7, Csnk1G2, Tgfbr1, Eprs, Pim3, Chek1, Clk1, Cdk4, Akt1, Hsp90B1, Nme1, Bub1, Uck2, Asna1, Ehd1, Top2A, Map3K11, Mars	444	545	16021	1.25795	1	0.998738	99.0512
SP_PIR_KEYWORDS	kinase	21	4.61538	0.298402	Prpf4B, Trpm7, Csnk1G2, Tgfbr1, Pkig, Hk2, Pim3, Chek1, Clk1, Cdk4, Prkcsh, Akt1, Cdkn1C, Galk1, Nme1, Bub1, Uck2, Dusp9, Guk1, Pik3R2, Map3K11	443	707	17854	1.1971	1	0.756663	99.1826
SP_PIR_KEYWORDS	serine/threonine-protein kinase	11	2.41758	0.473246	Akt1, Prpf4B, Csnk1G2, Trpm7, Tgfbr1, Bub1, Pim3, Chek1, Clk1, Cdk4, Map3K11	443	384	17854	1.1545	1	0.872544	99.9832
INTERPRO	IPR008271:Serine/threonine protein kinase, active site	10	2.1978	0.511172	Akt1, Prpf4B, Csnk1G2, Tgfbr1, Bub1, Pim3, Chek1, Clk1, Cdk4, Map3K11	432	360	17763	1.14217	1	0.999781	99.9984
UP_SEQ_FEATURE	active site:Proton acceptor	19	4.17582	0.56385	Prpf4B, Trpm7, Csnk1G2, Tgfbr1, Hsd17B12, Qdpr, Chek1, Pim3, Clk1, Cdk4, Akt1, Aldh1A2, Atic, Dld, Bub1, Txnrd1, Phpt1, Mdh2, Map3K11	444	662	16021	1.03562	1	0.999999	99.9998
GOTERM_MF_FAT	GO:0004674~protein serine/threonine kinase activity	12	2.63736	0.565977	Akt1, Prpf4B, Ccnd3, Csnk1G2, Trpm7, Tgfbr1, Bub1, Pim3, Chek1, Clk1, Cdk4, Map3K11	354	421	13288	1.06993	1	0.991919	99.9994
INTERPRO	IPR017442:Serine/threonine protein kinase-related	9	1.97802	0.690256	Akt1, Prpf4B, Csnk1G2, Tgfbr1, Pim3, Chek1, Clk1, Cdk4, Map3K11	432	374	17763	0.989472	1	0.999997	100
GOTERM_BP_FAT	GO:0006468~protein amino acid phosphorylation	17	3.73626	0.698533	Prpf4B, Gnai2, Trpm7, Csnk1G2, Tgfbr1, Trim28, Cad, Pim3, Chek1, Clk1, Cdk4, Tgfb2, Wnt2, Akt1, Ccnd1, Bub1, Map3K11	377	640	13588	0.957377	1	0.995215	100
INTERPRO	IPR002290:Serine/threonine protein kinase	6	1.31868	0.773897	Akt1, Prpf4B, Pim3, Chek1, Clk1, Cdk4	432	265	17763	0.930975	1	1	100
SMART	SM00220:S_TKc	6	1.31868	0.777388	Akt1, Prpf4B, Pim3, Chek1, Clk1, Cdk4	223	265	9131	0.927084	1	0.999965	100
INTERPRO	IPR017441:Protein kinase, ATP binding site	10	2.1978	0.802977	Akt1, Prpf4B, Csnk1G2, Tgfbr1, Bub1, Pim3, Chek1, Clk1, Cdk4, Map3K11	432	467	17763	0.880472	1	1	100
INTERPRO	IPR000719:Protein kinase, core	10	2.1978	0.846122	Akt1, Prpf4B, Csnk1G2, Tgfbr1, Bub1, Pim3, Chek1, Clk1, Cdk4, Map3K11	432	491	17763	0.837435	1	1	100
SP_PIR_KEYWORDS	transferase	30	6.59341	0.852043	Bcat1, Prpf4B, Hk2, Cad, Chek1, Clk1, Akt1, Galk1, Pole4, Prmt7, B3Gnt5, Atic, Bub1, Uck2, Mogat2, Shmt2, Trpm7, Csnk1G2, Tgfbr1, Tkt, Pim3, Cdk4, Esco2, Umps, Nme1, Pold2, Parp1, Psat1, Guk1, Map3K11	443	1385	17854	0.872978	1	0.994155	100
UP_SEQ_FEATURE	domain:Protein kinase	10	2.1978	0.913766	Akt1, Prpf4B, Csnk1G2, Tgfbr1, Bub1, Pim3, Chek1, Clk1, Cdk4, Map3K11	444	476	16021	0.758053	1	1	100
Annotation Cluster 103	Enrichment Score: 0.43203841871855236
Category	Term	Count	%	PValue	Genes	List Total	Pop Hits	Pop Total	Fold Enrichment	Bonferroni	Benjamini	FDR
GOTERM_CC_FAT	GO:0005741~mitochondrial outer membrane	4	0.879121	0.295883	Slc25A4, Bax, Tomm40, Cyb5B	298	80	12504	2.09799	1	0.808551	99.1651
GOTERM_CC_FAT	GO:0031968~organelle outer membrane	4	0.879121	0.34155	Slc25A4, Bax, Tomm40, Cyb5B	298	87	12504	1.92918	1	0.834176	99.6655
GOTERM_CC_FAT	GO:0019867~outer membrane	4	0.879121	0.36109	Slc25A4, Bax, Tomm40, Cyb5B	298	90	12504	1.86488	1	0.840328	99.7782
SP_PIR_KEYWORDS	mitochondrion outer membrane	3	0.659341	0.512456	Bax, Tomm40, Cyb5B	443	69	17854	1.75228	1	0.893885	99.9941
Annotation Cluster 104	Enrichment Score: 0.42340973816571487
Category	Term	Count	%	PValue	Genes	List Total	Pop Hits	Pop Total	Fold Enrichment	Bonferroni	Benjamini	FDR
SP_PIR_KEYWORDS	mitogen	3	0.659341	0.214582	Fgf9, Mdk, Tgfb2	443	35	17854	3.4545	1	0.645946	96.2223
GOTERM_BP_FAT	GO:0051781~positive regulation of cell division	3	0.659341	0.262773	Fgf9, Mdk, Tgfb2	377	36	13588	3.00354	1	0.843926	99.4431
GOTERM_BP_FAT	GO:0051302~regulation of cell division	3	0.659341	0.304055	Fgf9, Mdk, Tgfb2	377	40	13588	2.70318	1	0.878843	99.7912
SP_PIR_KEYWORDS	growth factor	4	0.879121	0.612217	Fgf9, Hdgf, Mdk, Tgfb2	443	127	17854	1.26937	1	0.940683	99.9997
GOTERM_MF_FAT	GO:0008083~growth factor activity	4	0.879121	0.727643	Fgf9, Hdgf, Mdk, Tgfb2	354	141	13288	1.06487	1	0.99924	100
Annotation Cluster 105	Enrichment Score: 0.41346802069221084
Category	Term	Count	%	PValue	Genes	List Total	Pop Hits	Pop Total	Fold Enrichment	Bonferroni	Benjamini	FDR
INTERPRO	IPR003959:ATPase, AAA-type, core	3	0.659341	0.307428	Psmc3, Yme1L1, Ruvbl2	432	46	17763	2.68161	1	0.991808	99.652
INTERPRO	IPR003593:ATPase, AAA+ type, core	5	1.0989	0.431551	Abce1, Psmc3, Atp5B, Yme1L1, Ruvbl2	432	138	17763	1.48978	1	0.999038	99.9834
SMART	SM00382:AAA	5	1.0989	0.433331	Abce1, Psmc3, Atp5B, Yme1L1, Ruvbl2	223	138	9131	1.48356	1	0.985506	99.8979
Annotation Cluster 106	Enrichment Score: 0.4114574349762995
Category	Term	Count	%	PValue	Genes	List Total	Pop Hits	Pop Total	Fold Enrichment	Bonferroni	Benjamini	FDR
SP_PIR_KEYWORDS	amino-acid biosynthesis	3	0.659341	0.0942996	Bcat1, Asns, Psat1	443	21	17854	5.7575	1	0.410678	73.9042
GOTERM_BP_FAT	GO:0009309~amine biosynthetic process	4	0.879121	0.328794	Bcat1, Asns, Psat1, Tgfb2	377	73	13588	1.97493	1	0.896077	99.8873
GOTERM_BP_FAT	GO:0008652~cellular amino acid biosynthetic process	3	0.659341	0.344905	Bcat1, Asns, Psat1	377	44	13588	2.45744	1	0.904076	99.9255
GOTERM_BP_FAT	GO:0046394~carboxylic acid biosynthetic process	3	0.659341	0.905294	Bcat1, Asns, Psat1	377	141	13588	0.76686	1	0.999918	100
GOTERM_BP_FAT	GO:0016053~organic acid biosynthetic process	3	0.659341	0.905294	Bcat1, Asns, Psat1	377	141	13588	0.76686	1	0.999918	100
Annotation Cluster 107	Enrichment Score: 0.4091234208940161
Category	Term	Count	%	PValue	Genes	List Total	Pop Hits	Pop Total	Fold Enrichment	Bonferroni	Benjamini	FDR
GOTERM_MF_FAT	GO:0042802~identical protein binding	11	2.41758	0.242776	Cct7, Grpel1, Casp8Ap2, Bax, Cldn5, Actn1, Robo2, Ssna1, Tcf3, Stub1, Tgfb2	354	290	13288	1.42381	1	0.901327	98.1932
GOTERM_MF_FAT	GO:0046983~protein dimerization activity	11	2.41758	0.416764	Grpel1, Bax, Scube1, Tgfbr1, Actn1, Robo2, Tcf3, Stub1, Sim2, Tgfb2, Smc4	354	340	13288	1.21442	1	0.971478	99.9583
GOTERM_MF_FAT	GO:0042803~protein homodimerization activity	6	1.31868	0.58551	Grpel1, Bax, Actn1, Tcf3, Stub1, Tgfb2	354	193	13288	1.16694	1	0.993441	99.9997
Annotation Cluster 108	Enrichment Score: 0.3896655736787779
Category	Term	Count	%	PValue	Genes	List Total	Pop Hits	Pop Total	Fold Enrichment	Bonferroni	Benjamini	FDR
GOTERM_CC_FAT	GO:0044449~contractile fiber part	4	0.879121	0.335025	Des, Arf1, Actn1, Fxr1	298	86	12504	1.95162	1	0.830793	99.6174
GOTERM_CC_FAT	GO:0030016~myofibril	4	0.879121	0.367587	Des, Arf1, Actn1, Fxr1	298	91	12504	1.84438	1	0.843455	99.8071
GOTERM_CC_FAT	GO:0043292~contractile fiber	4	0.879121	0.393442	Des, Arf1, Actn1, Fxr1	298	95	12504	1.76673	1	0.858347	99.8909
GOTERM_CC_FAT	GO:0030017~sarcomere	3	0.659341	0.57019	Des, Arf1, Actn1	298	80	12504	1.57349	1	0.943641	99.999
Annotation Cluster 109	Enrichment Score: 0.37855083458011896
Category	Term	Count	%	PValue	Genes	List Total	Pop Hits	Pop Total	Fold Enrichment	Bonferroni	Benjamini	FDR
GOTERM_BP_FAT	GO:0016044~membrane organization	10	2.1978	0.338384	Ap1S1, Gria2, Nme1, Fnbp1L, Bax, Mfge8, Timm50, Timm13, Ehd1, Epn1	377	272	13588	1.32509	1	0.900059	99.9118
SP_PIR_KEYWORDS	Endocytosis	4	0.879121	0.405775	Ap1S1, Nme1, Fnbp1L, Epn1	443	93	17854	1.73344	1	0.836921	99.9141
GOTERM_BP_FAT	GO:0006897~endocytosis	7	1.53846	0.42018	Ap1S1, Gria2, Nme1, Fnbp1L, Mfge8, Ehd1, Epn1	377	188	13588	1.34201	1	0.941632	99.9907
GOTERM_BP_FAT	GO:0010324~membrane invagination	7	1.53846	0.42018	Ap1S1, Gria2, Nme1, Fnbp1L, Mfge8, Ehd1, Epn1	377	188	13588	1.34201	1	0.941632	99.9907
GOTERM_BP_FAT	GO:0016192~vesicle-mediated transport	14	3.07692	0.528056	Clta, Mfge8, Ergic1, Llgl1, Ap1S1, Gria2, Arf1, Fnbp1L, Nme1, Trappc5, Rhob, Vamp3, Ehd1, Epn1	377	466	13588	1.08282	1	0.974392	99.9997
Annotation Cluster 110	Enrichment Score: 0.3760453867122664
Category	Term	Count	%	PValue	Genes	List Total	Pop Hits	Pop Total	Fold Enrichment	Bonferroni	Benjamini	FDR
GOTERM_BP_FAT	GO:0070647~protein modification by small protein conjugation or removal	6	1.31868	0.161372	Akt1, Sumo3, Usp9X, Ube2M, Nedd8, Stub1	377	104	13588	2.07937	1	0.717736	95.003
GOTERM_BP_FAT	GO:0032446~protein modification by small protein conjugation	5	1.0989	0.175163	Akt1, Sumo3, Ube2M, Nedd8, Stub1	377	79	13588	2.28117	1	0.73739	96.2321
GOTERM_MF_FAT	GO:0016879~ligase activity, forming carbon-nitrogen bonds	6	1.31868	0.58551	Sumo3, Ube2M, Asns, Cad, Stub1, Mthfd1L	354	193	13288	1.16694	1	0.993441	99.9997
GOTERM_MF_FAT	GO:0019787~small conjugating protein ligase activity	3	0.659341	0.848923	Sumo3, Ube2M, Stub1	354	125	13288	0.900881	1	0.999883	100
GOTERM_MF_FAT	GO:0016881~acid-amino acid ligase activity	3	0.659341	0.937781	Sumo3, Ube2M, Stub1	354	166	13288	0.678375	1	0.999997	100
Annotation Cluster 111	Enrichment Score: 0.3604624588203686
Category	Term	Count	%	PValue	Genes	List Total	Pop Hits	Pop Total	Fold Enrichment	Bonferroni	Benjamini	FDR
SP_PIR_KEYWORDS	extracellular matrix	11	2.41758	0.0394918	Wnt2, Lgals1, Smoc1, Emid2, Col1A2, Vcan, Col2A1, Sparc, Col1A1, Mfap4, Ntn1	443	213	17854	2.08135	0.999998	0.211922	42.1028
GOTERM_CC_FAT	GO:0044420~extracellular matrix part	6	1.31868	0.0678574	Smoc1, Col1A2, Col2A1, Sparc, Col1A1, Ntn1	298	92	12504	2.7365	1	0.415601	61.6567
GOTERM_CC_FAT	GO:0031012~extracellular matrix	12	2.63736	0.118455	Wnt2, Lgals1, Smoc1, Emid2, Hsd17B12, Col1A2, Vcan, Col2A1, Sparc, Col1A1, Mfap4, Ntn1	298	309	12504	1.6295	1	0.572762	82.092
GOTERM_CC_FAT	GO:0005578~proteinaceous extracellular matrix	11	2.41758	0.17055	Wnt2, Lgals1, Smoc1, Emid2, Col1A2, Vcan, Col2A1, Sparc, Col1A1, Mfap4, Ntn1	298	297	12504	1.55406	1	0.670131	92.1987
GOTERM_CC_FAT	GO:0005604~basement membrane	4	0.879121	0.25066	Smoc1, Col2A1, Sparc, Ntn1	298	73	12504	2.29916	1	0.757822	98.0483
GOTERM_CC_FAT	GO:0044421~extracellular region part	21	4.61538	0.380973	Fgf9, Lgals1, Hsd17B12, Hdgf, Col2A1, Mfge8, Sparc, Calr, Ntn1, Pdap1, Tgfb2, Wnt2, Metrn, Smoc1, Emid2, Fjx1, Col1A2, Vcan, Col1A1, Mfap4, Olfm1	298	774	12504	1.13844	1	0.849888	99.8559
GOTERM_CC_FAT	GO:0005615~extracellular space	11	2.41758	0.778098	Metrn, Fgf9, Lgals1, Hdgf, Fjx1, Mfge8, Col2A1, Calr, Pdap1, Olfm1, Tgfb2	298	511	12504	0.903243	1	0.990588	100
GOTERM_CC_FAT	GO:0005576~extracellular region	30	6.59341	0.978872	Fgf9, Hsd17B12, Hdgf, Col2A1, Calr, Mdk, Pdap1, B2M, Tgfb2, Wnt2, Islr, Pfn1, Metrn, Smoc1, Emid2, Cpa2, Olfm1, Scube1, Lgals1, Mfge8, Sparc, Ntn1, Npc2, Sfrp2, Col1A2, Fjx1, Tmsb4X, Vcan, Col1A1, Mfap4	298	1680	12504	0.749281	1	0.999963	100
SP_PIR_KEYWORDS	Secreted	23	5.05495	0.994983	Fgf9, Lgals1, Scube1, Col2A1, Mfge8, Sparc, Ntn1, Mdk, B2M, Tgfb2, Wnt2, Islr, Metrn, Npc2, Sfrp2, Smoc1, Emid2, Fjx1, Col1A2, Cpa2, Vcan, Col1A1, Mfap4	443	1420	17854	0.652787	1	0.999993	100
SP_PIR_KEYWORDS	disulfide bond	32	7.03297	0.999998	Txn2, Gfer, Pdia6, Timm13, Dlk1, Calr, Mdk, Slc7A5, B2M, Tgfb2, Ednra, Islr, Smoc1, Emid2, Cox6B1, Cpa2, Robo2, Olfm1, Ndufa2, Scube1, Tgfbr1, Mfge8, Sparc, Ntn1, Lamp1, Hsp90B1, Npc2, Sfrp2, Dld, Txnrd1, Vcan, Ngfr	443	2469	17854	0.522349	1	1	100
SP_PIR_KEYWORDS	signal	39	8.57143	1	Pdia6, Col2A1, Dlk1, Calr, Prkcsh, Serpinh1, Mdk, B2M, Tgfb2, Wnt2, Ednra, Islr, Metrn, Smoc1, Emid2, Cpa2, Robo2, Olfm1, Scube1, Tgfbr1, Tmem132A, Mfge8, Sparc, Gas1, Ntn1, Lamp1, Hsp90B1, Npc2, Gria2, Sfrp2, Sdf2L1, Fjx1, Col1A2, Vcan, Ngfr, Col1A1, Mfap4, Cdh11, Fkbp2	443	2970	17854	0.529225	1	1	100
UP_SEQ_FEATURE	disulfide bond	31	6.81319	1	Txn2, Gfer, Pdia6, Timm13, Dlk1, Calr, Mdk, B2M, Tgfb2, Ednra, Islr, Smoc1, Emid2, Cox6B1, Cpa2, Robo2, Olfm1, Ndufa2, Scube1, Tgfbr1, Mfge8, Sparc, Ntn1, Lamp1, Hsp90B1, Npc2, Sfrp2, Dld, Txnrd1, Vcan, Ngfr	444	2379	16021	0.470191	1	1	100
UP_SEQ_FEATURE	signal peptide	39	8.57143	1	Pdia6, Col2A1, Dlk1, Calr, Prkcsh, Serpinh1, Mdk, B2M, Tgfb2, Wnt2, Ednra, Islr, Metrn, Smoc1, Emid2, Cpa2, Robo2, Olfm1, Scube1, Tgfbr1, Tmem132A, Mfge8, Sparc, Gas1, Ntn1, Lamp1, Hsp90B1, Npc2, Gria2, Sfrp2, Sdf2L1, Fjx1, Col1A2, Vcan, Ngfr, Col1A1, Mfap4, Cdh11, Fkbp2	444	2963	16021	0.474941	1	1	100
SP_PIR_KEYWORDS	glycoprotein	39	8.57143	1	Fgf9, Tspan7, Col2A1, Dlk1, Prkcsh, Serpinh1, Slc7A5, Tgfb2, Wnt2, Ednra, Islr, B3Gnt5, Smoc1, Emid2, Robo2, Myc, Olfm1, Mest, Scube1, Tgfbr1, Tmem132A, Mfge8, Gas1, Sparc, Ntn1, Ergic1, Lamp1, Hsp90B1, Npc2, Gria2, Nup62, Slc6A6, Fjx1, Col1A2, Vcan, Col1A1, Ngfr, Mfap4, Cdh11	443	3600	17854	0.43661	1	1	100
UP_SEQ_FEATURE	glycosylation site:N-linked (GlcNAc...)	36	7.91209	1	Fgf9, Tspan7, Dlk1, Prkcsh, Serpinh1, Slc7A5, Tgfb2, Wnt2, Ednra, Islr, B3Gnt5, Smoc1, Emid2, Robo2, Olfm1, Mest, Scube1, Tgfbr1, Tmem132A, Mfge8, Gas1, Sparc, Ergic1, Ntn1, Lamp1, Hsp90B1, Npc2, Gria2, Slc6A6, Fjx1, Col1A2, Vcan, Col1A1, Ngfr, Mfap4, Cdh11	444	3444	16021	0.377178	1	1	100
Annotation Cluster 112	Enrichment Score: 0.35051481207281737
Category	Term	Count	%	PValue	Genes	List Total	Pop Hits	Pop Total	Fold Enrichment	Bonferroni	Benjamini	FDR
GOTERM_BP_FAT	GO:0051327~M phase of meiotic cell cycle	4	0.879121	0.441361	Ppp1Ca, Psmd13, Cyp26B1, Stag2	377	88	13588	1.63829	1	0.949842	99.995
GOTERM_BP_FAT	GO:0007126~meiosis	4	0.879121	0.441361	Ppp1Ca, Psmd13, Cyp26B1, Stag2	377	88	13588	1.63829	1	0.949842	99.995
GOTERM_BP_FAT	GO:0051321~meiotic cell cycle	4	0.879121	0.455897	Ppp1Ca, Psmd13, Cyp26B1, Stag2	377	90	13588	1.60189	1	0.954658	99.9968
Annotation Cluster 113	Enrichment Score: 0.3461976124815091
Category	Term	Count	%	PValue	Genes	List Total	Pop Hits	Pop Total	Fold Enrichment	Bonferroni	Benjamini	FDR
UP_SEQ_FEATURE	region of interest:Linker 2	3	0.659341	0.0419195	Des, Lmnb1, Lmnb2	444	12	16021	9.02083	1	0.783457	49.8821
INTERPRO	IPR018039:Intermediate filament protein, conserved site	4	0.879121	0.254234	Des, Lmnb1, Lmnb2, Lix1	432	72	17763	2.28434	1	0.985601	98.9114
PIR_SUPERFAMILY	PIRSF002282:cytoskeletal keratin	3	0.659341	0.455573	Des, Lmnb1, Lmnb2	236	53	8136	1.95139	1	1	99.9651
INTERPRO	IPR016044:Filament	3	0.659341	0.509366	Des, Lmnb1, Lmnb2	432	70	17763	1.7622	1	0.999797	99.9983
INTERPRO	IPR001664:Intermediate filament protein	3	0.659341	0.524457	Des, Lmnb1, Lmnb2	432	72	17763	1.71325	1	0.999821	99.9989
UP_SEQ_FEATURE	region of interest:Coil 1B	3	0.659341	0.540172	Des, Lmnb1, Lmnb2	444	65	16021	1.66538	1	0.999999	99.9996
UP_SEQ_FEATURE	region of interest:Linker 1	3	0.659341	0.540172	Des, Lmnb1, Lmnb2	444	65	16021	1.66538	1	0.999999	99.9996
UP_SEQ_FEATURE	region of interest:Coil 1A	3	0.659341	0.540172	Des, Lmnb1, Lmnb2	444	65	16021	1.66538	1	0.999999	99.9996
UP_SEQ_FEATURE	region of interest:Rod	3	0.659341	0.54845	Des, Lmnb1, Lmnb2	444	66	16021	1.64015	1	0.999999	99.9997
SP_PIR_KEYWORDS	Intermediate filament	3	0.659341	0.550165	Des, Lmnb1, Lmnb2	443	74	17854	1.63388	1	0.913569	99.998
UP_SEQ_FEATURE	region of interest:Head	3	0.659341	0.556623	Des, Lmnb1, Lmnb2	444	67	16021	1.61567	1	0.999999	99.9998
UP_SEQ_FEATURE	region of interest:Tail	3	0.659341	0.580507	Des, Lmnb1, Lmnb2	444	70	16021	1.54643	1	1	99.9999
GOTERM_CC_FAT	GO:0005882~intermediate filament	3	0.659341	0.840652	Des, Lmnb1, Lmnb2	298	137	12504	0.918826	1	0.995689	100
GOTERM_CC_FAT	GO:0045111~intermediate filament cytoskeleton	3	0.659341	0.849329	Des, Lmnb1, Lmnb2	298	140	12504	0.899137	1	0.995984	100
Annotation Cluster 114	Enrichment Score: 0.3290909186777904
Category	Term	Count	%	PValue	Genes	List Total	Pop Hits	Pop Total	Fold Enrichment	Bonferroni	Benjamini	FDR
SP_PIR_KEYWORDS	myristate	5	1.0989	0.28449	Gnai3, Gnai2, Arf1, Basp1, Arl3	443	109	17854	1.84874	1	0.741092	98.9331
UP_SEQ_FEATURE	lipid moiety-binding region:N-myristoyl glycine	5	1.0989	0.337013	Gnai3, Gnai2, Arf1, Basp1, Arl3	444	106	16021	1.70204	1	0.999873	99.868
UP_SEQ_FEATURE	nucleotide phosphate-binding region:GTP	9	1.97802	0.483618	Rasl11B, Gnai3, Gnai2, Arf1, Gna11, Rhob, Tubb6, Tuba1B, Arl3	444	274	16021	1.18522	1	0.999997	99.9977
SP_PIR_KEYWORDS	gtp-binding	9	1.97802	0.509295	Rasl11B, Gnai3, Gnai2, Arf1, Gna11, Rhob, Tubb6, Tuba1B, Arl3	443	313	17854	1.15886	1	0.89399	99.9936
SP_PIR_KEYWORDS	lipoprotein	10	2.1978	0.957989	Gnai3, Gria2, Gnai2, Arf1, Lmnb1, Lmnb2, Rhob, Gas1, Basp1, Arl3	443	589	17854	0.684253	1	0.999444	100
Annotation Cluster 115	Enrichment Score: 0.32376278825731053
Category	Term	Count	%	PValue	Genes	List Total	Pop Hits	Pop Total	Fold Enrichment	Bonferroni	Benjamini	FDR
GOTERM_BP_FAT	GO:0009582~detection of abiotic stimulus	4	0.879121	0.173736	Gnb1, Nr2F6, Ngfr, Myc	377	52	13588	2.7725	1	0.735551	96.1196
GOTERM_BP_FAT	GO:0009581~detection of external stimulus	4	0.879121	0.230838	Gnb1, Nr2F6, Ngfr, Myc	377	60	13588	2.40283	1	0.809766	98.8535
BIOCARTA	m_erkPathway:Erk1/Erk2 Mapk Signaling pathway	3	0.659341	0.395012	Gnb1, Ngfr, Myc	52	31	1171	2.17928	1	0.990425	99.6611
GOTERM_BP_FAT	GO:0009628~response to abiotic stimulus	9	1.97802	0.396054	Obfc2B, Dhx9, Gnb1, Bax, Nr2F6, Col1A1, Ngfr, Eif2B2, Myc	377	251	13588	1.29236	1	0.931551	99.9813
GOTERM_BP_FAT	GO:0051606~detection of stimulus	4	0.879121	0.455897	Gnb1, Nr2F6, Ngfr, Myc	377	90	13588	1.60189	1	0.954658	99.9968
GOTERM_BP_FAT	GO:0009314~response to radiation	5	1.0989	0.561728	Obfc2B, Gnb1, Bax, Nr2F6, Myc	377	143	13588	1.26023	1	0.980995	99.9999
GOTERM_BP_FAT	GO:0009416~response to light stimulus	3	0.659341	0.758892	Gnb1, Bax, Nr2F6	377	98	13588	1.10334	1	0.997823	100
GOTERM_BP_FAT	GO:0050890~cognition	3	0.659341	1	Gnb1, Nr2F6, Myc	377	1480	13588	0.073059	1	1	100
GOTERM_BP_FAT	GO:0007600~sensory perception	3	0.659341	1	Gnb1, Nr2F6, Myc	377	1402	13588	0.0771236	1	1	100
Annotation Cluster 116	Enrichment Score: 0.31895101512540014
Category	Term	Count	%	PValue	Genes	List Total	Pop Hits	Pop Total	Fold Enrichment	Bonferroni	Benjamini	FDR
GOTERM_BP_FAT	GO:0045936~negative regulation of phosphate metabolic process	3	0.659341	0.190976	Cdkn1C, Bax, Ywhae	377	29	13588	3.72853	1	0.7603	97.29
GOTERM_BP_FAT	GO:0010563~negative regulation of phosphorus metabolic process	3	0.659341	0.190976	Cdkn1C, Bax, Ywhae	377	29	13588	3.72853	1	0.7603	97.29
GOTERM_BP_FAT	GO:0044092~negative regulation of molecular function	6	1.31868	0.302338	Gnai2, Nup62, Pkig, Ints1, Dusp9, Myc	377	132	13588	1.63829	1	0.877908	99.7823
GOTERM_BP_FAT	GO:0043086~negative regulation of catalytic activity	5	1.0989	0.306053	Gnai2, Nup62, Pkig, Ints1, Dusp9	377	101	13588	1.78428	1	0.880052	99.8012
GOTERM_BP_FAT	GO:0033673~negative regulation of kinase activity	3	0.659341	0.414276	Nup62, Pkig, Dusp9	377	51	13588	2.12014	1	0.939437	99.9889
GOTERM_BP_FAT	GO:0006469~negative regulation of protein kinase activity	3	0.659341	0.414276	Nup62, Pkig, Dusp9	377	51	13588	2.12014	1	0.939437	99.9889
GOTERM_BP_FAT	GO:0051348~negative regulation of transferase activity	3	0.659341	0.433437	Nup62, Pkig, Dusp9	377	53	13588	2.04014	1	0.946954	99.9937
GOTERM_BP_FAT	GO:0051174~regulation of phosphorus metabolic process	8	1.75824	0.731722	Cdkn1C, Gnai2, Nup62, Bax, Pkig, Dusp9, Ywhae, Pik3R2	377	301	13588	0.957939	1	0.996862	100
GOTERM_BP_FAT	GO:0019220~regulation of phosphate metabolic process	8	1.75824	0.731722	Cdkn1C, Gnai2, Nup62, Bax, Pkig, Dusp9, Ywhae, Pik3R2	377	301	13588	0.957939	1	0.996862	100
GOTERM_BP_FAT	GO:0051338~regulation of transferase activity	5	1.0989	0.805083	Serinc2, Gnai2, Nup62, Pkig, Dusp9	377	199	13588	0.905589	1	0.999025	100
GOTERM_BP_FAT	GO:0042325~regulation of phosphorylation	7	1.53846	0.817796	Cdkn1C, Gnai2, Nup62, Bax, Pkig, Dusp9, Pik3R2	377	290	13588	0.86999	1	0.999204	100
GOTERM_BP_FAT	GO:0045859~regulation of protein kinase activity	4	0.879121	0.892202	Gnai2, Nup62, Pkig, Dusp9	377	186	13588	0.775106	1	0.999875	100
GOTERM_BP_FAT	GO:0043549~regulation of kinase activity	4	0.879121	0.904158	Gnai2, Nup62, Pkig, Dusp9	377	192	13588	0.750884	1	0.999916	100
Annotation Cluster 117	Enrichment Score: 0.3018290380736668
Category	Term	Count	%	PValue	Genes	List Total	Pop Hits	Pop Total	Fold Enrichment	Bonferroni	Benjamini	FDR
GOTERM_MF_FAT	GO:0005539~glycosaminoglycan binding	5	1.0989	0.359215	Fgf9, Hsd17B12, Hdgf, Vcan, Mdk	354	114	13288	1.64635	1	0.956724	99.8377
SP_PIR_KEYWORDS	heparin-binding	3	0.659341	0.378981	Fgf9, Hdgf, Mdk	443	53	17854	2.28127	1	0.823215	99.8437
GOTERM_MF_FAT	GO:0008201~heparin binding	4	0.879121	0.379487	Fgf9, Hsd17B12, Hdgf, Mdk	354	83	13288	1.809	1	0.96222	99.8979
GOTERM_MF_FAT	GO:0001871~pattern binding	5	1.0989	0.443296	Fgf9, Hsd17B12, Hdgf, Vcan, Mdk	354	128	13288	1.46628	1	0.976865	99.9787
GOTERM_MF_FAT	GO:0030247~polysaccharide binding	5	1.0989	0.443296	Fgf9, Hsd17B12, Hdgf, Vcan, Mdk	354	128	13288	1.46628	1	0.976865	99.9787
SP_PIR_KEYWORDS	growth factor	4	0.879121	0.612217	Fgf9, Hdgf, Mdk, Tgfb2	443	127	17854	1.26937	1	0.940683	99.9997
GOTERM_MF_FAT	GO:0008083~growth factor activity	4	0.879121	0.727643	Fgf9, Hdgf, Mdk, Tgfb2	354	141	13288	1.06487	1	0.99924	100
GOTERM_MF_FAT	GO:0030246~carbohydrate binding	7	1.53846	0.851113	Fgf9, Lgals1, Hsd17B12, Hdgf, Vcan, Calr, Mdk	354	317	13288	0.828887	1	0.999882	100
Annotation Cluster 118	Enrichment Score: 0.30172359033515533
Category	Term	Count	%	PValue	Genes	List Total	Pop Hits	Pop Total	Fold Enrichment	Bonferroni	Benjamini	FDR
GOTERM_BP_FAT	GO:0015931~nucleobase, nucleoside, nucleotide and nucleic acid transport	4	0.879121	0.336409	Xpo1, Slc25A4, Nup62, Ckap5	377	74	13588	1.94824	1	0.899791	99.9072
GOTERM_BP_FAT	GO:0051236~establishment of RNA localization	3	0.659341	0.548938	Xpo1, Nup62, Ckap5	377	66	13588	1.63829	1	0.978827	99.9999
GOTERM_BP_FAT	GO:0050658~RNA transport	3	0.659341	0.548938	Xpo1, Nup62, Ckap5	377	66	13588	1.63829	1	0.978827	99.9999
[truncated: 251 more rows]

## Sheet: Table S3 Novel TARs
id	chr	start	stop	MM_FL1	MM_FL2	MM_HL1	MM_HL2	log2FC	LRT-stat	rawP	bonP	BHP
[truncated: 2,334 more rows]

[truncated: 15 more sheets: Table_S4_Limb_novel_splice.txt, Table_S5_E10.5_H3K27AC_regions, Table_S6_E10.5_H3K27ME3_regions, Table_S7_E11.5_H3K27AC_regions, Table_S8_E10.5_H3K27AC_DM, Table_S9_Limb VS MES DE, Table_S10_Limb VS NPC DE, Table_S11_H3K27AC clustering, Table_S12_Txn_Motif_#, Table_S13_Limb Txn Motif GO, Table_S14_E10.5_E11.5_FL_DM, Table_S15_E10.5_E11.5_HL_DM, Table_S16_Primers, Table_S17_Sequencing Stats, Table_S18_nTAR_blastx]
